# Supplementary material
Source: PubMed Central journal article supplement (PMC5023504)
Supplement: NIHMS812547-supplement-Supporting_Information.pdf [file NIHMS812547-supplement-Supporting_Information.pdf]

# ***Accessing Both Retention and Inversion Pathways in Stereospecific, Nickel-Catalyzed Miyaura Borylations of Allylic Pivalates***

Qi Zhou, Harathi D. Srinivas, Songnan Zhang, Mary P. Watson\*

Department of Chemistry and Biochemistry, University of Delaware, Newark, DE 19716

[mpwatson@udel.edu](mailto:mpwatson@udel.edu)

## **Supporting Information**

|                                                                                                                                          |             |
|------------------------------------------------------------------------------------------------------------------------------------------|-------------|
| <b>General Information</b> .....                                                                                                         | <b>S2</b>   |
| <b>Leaving Group Effects</b> .....                                                                                                       | <b>S3</b>   |
| <b>Borylation of Allylic Pivalates</b> .....                                                                                             | <b>S4</b>   |
| General Procedure A: Borylation with Retention of Configuration .....                                                                    | S4          |
| General Procedure B: Borylation with Inversion of Configuration.....                                                                     | S5          |
| General Procedure C: Oxidation of Allylic Boronates to Allylic Alcohols for<br>Determination of Enantiomeric Excess (ee). .....          | S6          |
| <b>Use of Other Diboron Reagents</b> .....                                                                                               | <b>S26</b>  |
| Bis(neopentyl glycolato)diboron.....                                                                                                     | S26         |
| Bis(hexylene glycolato)diboron.....                                                                                                      | S27         |
| <b>Preparation of Potassium Trifluoroborate Salt 4q</b> .....                                                                            | <b>S27</b>  |
| <b>Preparation of Potassium Trifluoroborate Salt (R)-7</b> .....                                                                         | <b>S29</b>  |
| <b>Mechanistic Experiments</b> .....                                                                                                     | <b>S31</b>  |
| Solvent Effect .....                                                                                                                     | S31         |
| Leaving Group Effect: Hammett Correlation.....                                                                                           | S33         |
| Addition of Benzonitriles: Hammett Correlation .....                                                                                     | S34         |
| <b>Preparation of Allylic Pivalates</b> .....                                                                                            | <b>S36</b>  |
| General Procedure D: Preparation of ( <i>S,E</i> )-4-(3-methoxyphenyl)but-3-en-2-yl<br>pivalate (( <i>S</i> )-1f).....                   | S36         |
| <b>Preparation of Allylic Alcohols</b> .....                                                                                             | <b>S42</b>  |
| General Procedure E: Preparation of ( <i>R,E</i> )-4-(4-(methylthio)phenyl)but-3-en-2-ol<br>(( <i>R</i> )-3c) via CBS Reduction .....    | S42         |
| General Procedure F: Preparation of ( <i>S,E</i> )-4-(4-isopropylphenyl)but-3-en-2-ol (( <i>S</i> )-<br>3b) via Kinetic Resolution ..... | S43         |
| Preparation of Allylic Alcohols .....                                                                                                    | S44         |
| Preparation of ( <i>S,E</i> )-1-phenylhept-2-en-1-ol (( <i>S</i> )-3r). .....                                                            | S45         |
| <b>NMR Spectra</b> .....                                                                                                                 | <b>S47</b>  |
| <b>HPLC Traces</b> .....                                                                                                                 | <b>S135</b> |

## General Information

Reactions were performed in oven-dried vials with Teflon-lined caps or in oven-dried round-bottomed flasks unless otherwise noted. Flasks were fitted with rubber septa, and reactions were conducted under a positive pressure of N<sub>2</sub>. Stainless steel syringes or cannulae were used to transfer air- and moisture-sensitive liquids. Flash chromatography was performed on silica gel 60 (40-63 μm, 60Å) unless otherwise noted. Commercial reagents were purchased from Sigma Aldrich, Acros, Fisher, Strem, TCI, Combi Blocks, Alfa Aesar, or Cambridge Isotopes Laboratories and used as received with the following exceptions: Potassium phosphate and bis(pinacolato)diboron were purchased from Sigma Aldrich and immediately placed in a N<sub>2</sub>-atmosphere glovebox for storage. Pivaloyl chloride was purchased from Acros and distilled before use. PhMe, CH<sub>2</sub>Cl<sub>2</sub>, MeCN, and THF were dried by passing through drying columns.<sup>1</sup> PhMe and MeCN were then degassed by sparging with N<sub>2</sub> and stored over activated 4Å MS in a N<sub>2</sub>-atmosphere glovebox. Enantioenriched allylic alcohols are obtained via either CBS reduction of ketones or kinetic resolution of racemic allylic alcohols according to procedures reported in the literature.<sup>2</sup> Oven-dried potassium carbonate was added into CDCl<sub>3</sub> to remove trace amount of acid. Proton nuclear magnetic resonance (<sup>1</sup>H NMR) spectra and carbon nuclear magnetic resonance (<sup>13</sup>C NMR) spectra were recorded on both 400 MHz and 600 MHz spectrometers. Chemical shifts for protons are reported in parts per million downfield from tetramethylsilane and are referenced to residual protium in the NMR solvent (CHCl<sub>3</sub> = δ 7.26). Chemical shifts for carbon are reported in parts per million downfield from tetramethylsilane and are referenced to the carbon resonances of the solvent (CDCl<sub>3</sub> = δ 77.2). Data are represented as follows: chemical shift, multiplicity (br = broad, s = singlet, d = doublet, t = triplet, q = quartet, p = pentet, m = multiplet, dd = doublet of doublets, h = heptet), coupling constants in Hertz (Hz), integration. Infrared (IR) spectra

<sup>1</sup> Pangborn, A. B.; Giardello, M. A.; Grubbs, R. H.; Rosen, R. K.; Timmers, F. J. *Organometallics* **1996**.

<sup>2</sup> CBS reduction of ketones, see: (a) Corey, E. J.; Bakshi, R. K. *Tetrahedron Lett.* **1990**, *31*, 611. (b) Corey, E. J.; Helal, C. J. *Tetrahedron Lett.* **1995**, *36*, 9153. Kinetic resolution of allylic alcohols, see: (c) Sasaki, M.; Ikemoto, H.; Kawahata, M.; Yamaguchi, K.; Takeda, K. *Chem. Eur. J.* **2009**, *15*, 4663.

were obtained using FTIR spectrophotometers with material loaded onto a NaCl plate. The mass spectral data were obtained at the University of Delaware mass spectrometry facility. Optical rotations were measured using a 2.5 mL cell with a 0.1 dm path length. Melting points were taken on a Stuart SMP10 instrument.

## Leaving Group Effects

The effect of various leaving groups was examined under stereoinvertive and stereoretentive conditions. Please note that these conditions are not the final optimized conditions.

**Table S1. Leaving Group Effects Under Inversion Conditions.**

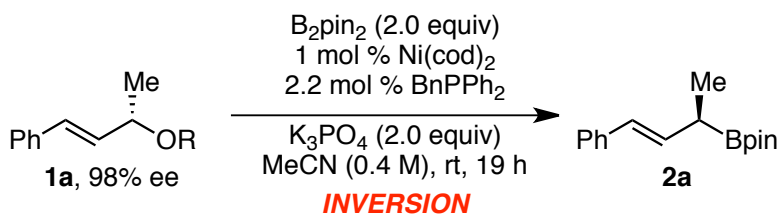

| Entry | R                                 | Conversion (%) <sup>a</sup> | Yield (%) <sup>a</sup> | ee (%) <sup>b</sup> |
|-------|-----------------------------------|-----------------------------|------------------------|---------------------|
| 1     | Piv                               | >99                         | 88                     | 95                  |
| 2     | Ac                                | 56                          | 53                     | 95                  |
| 3     |                                   | 88                          | 69                     | 92                  |
| 4     | Boc                               | 86                          | 44                     | 95                  |
| 5     | C(O)NMe <sub>2</sub>              | >99                         | 71                     | 92                  |
| 6     | C(O)C <sub>6</sub> F <sub>5</sub> | 38                          | 13                     | 80                  |

<sup>a</sup> Determined by <sup>1</sup>H NMR analysis using 1,3,5-trimethoxybenzene as internal standard. <sup>b</sup> ee's of the subsequent alcohol (**3a**), formed via oxidation with H<sub>2</sub>O<sub>2</sub> and NaOH. Determined by HPLC analysis using a chiral stationary phase.

**Table S2. Leaving Group Effects Under Retention Conditions.**

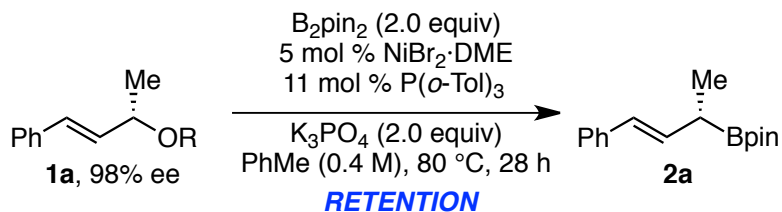

| Entry | R            | Conversion (%) <sup>a</sup> | Yield (%) <sup>a</sup> | ee (%) <sup>b</sup> |
|-------|--------------|-----------------------------|------------------------|---------------------|
| 1     | Piv          | 91                          | 85                     | 97                  |
| 2     | Ac           | 65                          | 55                     | 96                  |
| 3     |              | 48                          | 40                     | 95                  |
| 4     | Boc          | >99                         | 71                     | 72                  |
| 5     | $C(O)NMe_2$  | >99                         | 75                     | 94                  |
| 6     | $C(O)C_6F_5$ | 36                          | 26                     | 46                  |

<sup>a</sup> Determined by  $^1H$  NMR analysis using 1,3,5-trimethoxybenzene as internal standard. <sup>b</sup> ee's of the subsequent alcohol (**3a**), formed via oxidation with  $H_2O_2$  and NaOH. Determined by HPLC analysis using a chiral stationary phase.

## Borylation of Allylic Pivalates

### General Procedure A: Borylation with Retention of Configuration

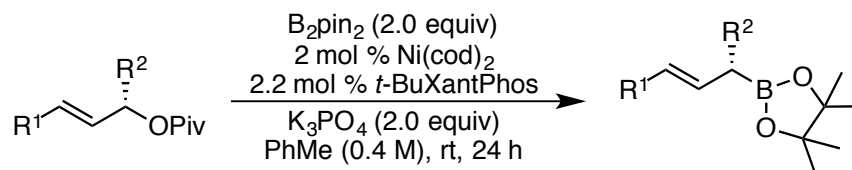

In a  $N_2$ -atmosphere glovebox,  $Ni(cod)_2$  (2.2 mg, 0.0080 mmol, 2 mol %),  $t-BuXantPhos$  (4.4 mg, 0.0088 mmol, 2.2 mol %) and  $K_3PO_4$  (169.7 mg, 0.8 mmol, 2.0 equiv) were weighed into a 2-dram vial fitted with a magnetic stir bar.  $B_2pin_2$  (203 mg, 0.80 mmol, 2.0 equiv) and allylic pivalate (0.40 mmol, 1.0 equiv) were added, followed by

PhMe (1.0 mL, 0.4 M). The vial was capped with a Teflon-lined cap and removed from the glovebox. The mixture was stirred at room temperature for 24 h. The reaction mixture was then diluted with Et<sub>2</sub>O (2.5 mL) and quickly filtered through a plug of silica gel and Celite<sup>®</sup>, which was then rinsed with Et<sub>2</sub>O (~ 15 mL). The filtrate was concentrated and then purified by silica gel chromatography to give the allylic boronate product. The  $\alpha:\gamma$  ratios reported below are of isolated allylic boronates. The allylic boronate was then converted to the corresponding allylic alcohol via oxidation (see General Procedure C below) to determine the enantiomeric excess (ee).

### General Procedure B: Borylation with Inversion of Configuration

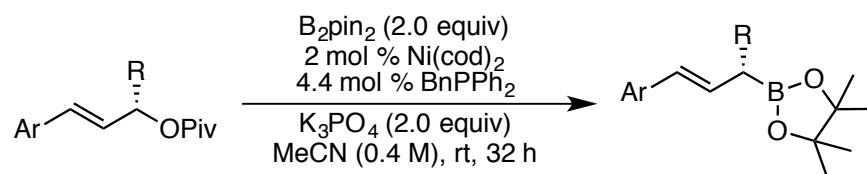

In a N<sub>2</sub>-atmosphere glovebox, Ni(cod)<sub>2</sub> (2.2 mg, 0.0080 mmol, 2 mol %), BnPPH<sub>2</sub> (4.9 mg, 0.0176 mmol, 4.4 mol %) and K<sub>3</sub>PO<sub>4</sub> (169.7 mg, 0.80 mmol, 2.0 equiv) were weighed into a 2-dram vial fitted with a magnetic stir bar. B<sub>2</sub>pin<sub>2</sub> (203 mg, 0.80 mmol, 2.0 equiv) and allylic pivalate (0.40 mmol, 1.0 equiv) were added, followed by MeCN (1.0 mL, 0.4 M). The vial was capped with a Teflon-lined cap and removed from the glovebox. The mixture was stirred at room temperature for 32 h. The reaction mixture was then diluted with Et<sub>2</sub>O (2.5 mL) and quickly filtered through a plug of silica gel and Celite<sup>®</sup>, which was then rinsed with Et<sub>2</sub>O (~15 mL). The filtrate was concentrated and then purified by silica gel chromatography to give the allylic boronate product. The  $\alpha:\gamma$  ratios reported below are of isolated allylic boronates. The allylic boronate was then converted to the corresponding allylic alcohol via oxidation (see General Procedure C below) to determine the enantiomeric excess (ee).

## General Procedure C: Oxidation of Allylic Boronates to Allylic Alcohols for Determination of Enantiomeric Excess (ee).

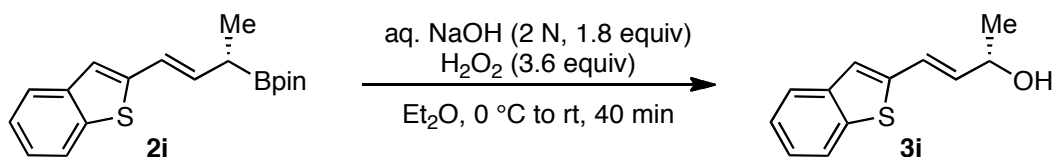

A solution of (*S,E*)-2-(4-(benzothiophen-2-yl)but-3-en-2-yl)-4,4,5,5-tetramethyl-1,3,2-dioxaborolane ((*S*)-**2i**, 10 mg, 0.0318 mmol, 1.0 equiv) and Et<sub>2</sub>O (0.08 mL, 0.4M) was cooled to 0 °C. Aqueous NaOH (2 N, 0.029 mL, 0.058 mmol, 1.8 equiv) was added, followed by H<sub>2</sub>O<sub>2</sub> (0.013 mL, 0.116 mmol, 3.6 equiv). The mixture was stirred at 0 °C for 10 min and then at room temperature for an additional 30 min. The reaction mixture was diluted with H<sub>2</sub>O, and extracted with Et<sub>2</sub>O. The organic layer was dried (MgSO<sub>4</sub>), filtered, and concentrated to give (*S*)-**3i** (6.45 mg, 99%) with sufficient purity for HPLC analysis using a chiral stationary phase without further purification. The oxidations of other boronates were performed with different amounts of starting material.

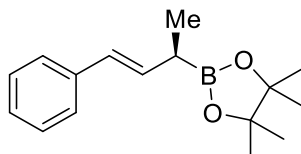

### (*R,E*)-4,4,5,5-Tetramethyl-2-(4-phenylbut-3-en-2-yl)-1,3,2-dioxaborolane ((*R*)-**2a**).

Prepared via General Procedure A using pivalate **1a** (prepared in 98% ee). The crude mixture was purified by silica gel chromatography (0–2% Et<sub>2</sub>O/hexanes) to give (*R*)-**2a** (run 1: 78.4 mg,  $\alpha:\gamma=20:1$ , 76%; run 2: 77.2 mg,  $\alpha:\gamma=20:1$ , 75%) as colorless oil.  $[\alpha]_D^{24} = +15.9$  (c 0.69, MeOH): <sup>1</sup>H NMR (600 MHz, CDCl<sub>3</sub>)  $\delta$  7.37 – 7.33 (m, 2H), 7.30 – 7.26 (m, 2H), 7.19 – 7.14 (m, 1H), 6.37 – 6.32 (m, 2H), 2.15 – 2.0 (m, 1H), 1.24 (s, 12H), 1.19 (d,  $J = 7.3$  Hz, 3H); <sup>13</sup>C NMR (151 MHz, CDCl<sub>3</sub>)  $\delta$  138.3, 133.3, 128.4, 127.6, 126.5, 125.9, 83.3, 24.7, 24.6, 14.8;<sup>3</sup> <sup>11</sup>B NMR (193 MHz, CDCl<sub>3</sub>)  $\delta$  33.2; FTIR (NaCl/thin film) 2977, 1457, 1379, 1352, 1322, 1143, 965, 750, 695 cm<sup>-1</sup>; HRMS (LIFDI)  $[M]^+$  calculated for C<sub>16</sub>H<sub>22</sub>BO<sub>2</sub>: 257.1713, found: 257.1734.

<sup>3</sup> In some cases, the allylic carbon is not observed due to quadrupolar broadening caused by <sup>11</sup>B.

Boronate (*R*)-**2a** was oxidized to alcohol (*R*)-**3a** via General Procedure C. The enantiomeric excess was determined to be 97% (run 1: 96% ee; run 2: 97% ee) by chiral HPLC analysis (CHIRALPAK IB, 1.0 mL/min, 3% *i*-PrOH/hexanes,  $\lambda=254$  nm);  $t_R(\text{major}) = 15.323$  min,  $t_R(\text{minor}) = 23.090$  min. The spectral data of this alcohol matched that of alcohol **3a** as prepared via General Procedure E (see below).

The borylation of pivalate **1a** was also performed on 5-mmol scale, following General Procedure A. In a N<sub>2</sub>-atmosphere glovebox, pivalate **1a** (116.1 mg, 5.0 mmol, 1.0 equiv), Ni(cod)<sub>2</sub> (27.5 mg, 0.10 mmol, 2 mol %), *t*-Bu-XantPhos (55 mg, 0.11 mmol, 2.2 mol %) and K<sub>3</sub>PO<sub>4</sub> (2.12 g, 10 mmol, 2.0 equiv) were weighed into a heavy wall pressure vessel. B<sub>2</sub>pin<sub>2</sub> (2.54 g, 10 mmol, 2.0 equiv) and pivalate **1a** (1.16 g, 5 mmol, 1.0 equiv) were added, followed by PhMe (12.5 mL, 0.4 M). The vessel was sealed, and removed from the glovebox. The mixture was stirred at room temperature for 24 h, then diluted with Et<sub>2</sub>O (25 mL), and filtered through a plug of silica gel and Celite<sup>®</sup>. The filter cake was rinsed with Et<sub>2</sub>O (50 mL). The filtrate was concentrated and then purified by silica gel chromatography (0–2% Et<sub>2</sub>O/hexanes) to give the (*R*)-**2a** (938 mg, 73%,  $\alpha:\gamma=20:1$ ). Boronate (*R*)-**2a** was then oxidized to alcohol (*R*)-**3a** via General Procedure C. The enantiomeric excess was determined to be 93%.

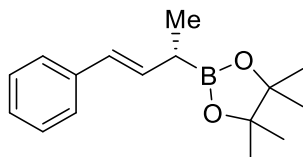

**(*S,E*)-4,4,5,5-Tetramethyl-2-(4-phenylbut-3-en-2-yl)-1,3,2-dioxaborolane ((*S*)-**2a**).** Prepared via General Procedure B using pivalate **1a** (prepared in 98% ee). The crude mixture was purified by silica gel chromatography (0–2% Et<sub>2</sub>O/hexanes) to give (*S*)-**2a** (run 1: 88.2 mg,  $\alpha:\gamma=7:1$ , 85%; run 2: 83.0 mg,  $\alpha:\gamma=9:1$ , 80%) as colorless oil.  $[\alpha]_D^{24} = -27.8$  (c 0.72, CHCl<sub>3</sub>). The spectral data of this compound matches that described above.

Boronate (*S*)-**2a** was oxidized to alcohol (*S*)-**3a** via General Procedure C. The enantiomeric excess was determined to be 87% (run 1: 86% ee; run 2: 87% ee) by chiral HPLC analysis (CHIRALPAK IB, 1.0 mL/min, 3% *i*-PrOH/hexanes,  $\lambda=254$  nm);  $t_R(\text{major}) = 22.980$  min,  $t_R(\text{minor}) = 15.249$  min. The spectral data of this alcohol matched that of alcohol **3a** as prepared via General Procedure E (see below).

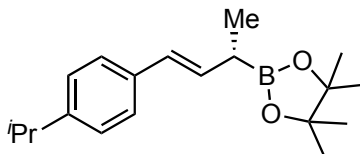

**(*S,E*)-2-(4-(4-isopropylphenyl)but-3-en-2-yl)-4,4,5,5-tetramethyl-1,3,2-dioxaborolane ((*S*)-2b).** Prepared via General Procedure A using pivalate **1b** (prepared in 92% ee). The crude mixture was purified by silica gel chromatography (0–4% Et<sub>2</sub>O/hexanes) to give (*S*)-**2b** (run 1: 93.8 mg, 78%,  $\alpha:\gamma > 20:1$ ; run 2: 96.8 mg, 81%,  $\alpha:\gamma > 20:1$ ) as colorless oil.  $[\alpha]_D^{24} = +6.0$  (c 2.6, CHCl<sub>3</sub>): <sup>1</sup>H NMR (600 MHz, CDCl<sub>3</sub>)  $\delta$  7.28 (d,  $J = 8.1$  Hz, 2H), 7.14 (d,  $J = 8.2$  Hz, 2H), 6.37 – 6.22 (m, 2H), 2.87 (h,  $J = 6.9$  Hz, 1H), 2.04 (p,  $J = 7.2$  Hz, 1H), 1.25 – 1.22 (m, 18H), 1.18 (d,  $J = 7.3$  Hz, 3H); <sup>13</sup>C NMR (151 MHz, CDCl<sub>3</sub>)  $\delta$  147.4, 136.1, 132.5, 127.6, 126.6, 126.0, 83.4, 33.9, 24.9, 24.8, 24.1, 15.1;<sup>3</sup> <sup>11</sup>B NMR (193 MHz, CDCl<sub>3</sub>)  $\delta$  33.2; FTIR (NaCl/thin film) 2961, 2872, 1653, 1558, 1507, 1457, 1379, 1325, 1143, 966, 855 cm<sup>-1</sup>; HRMS (LIFDI) [M]<sup>+</sup> calculated for C<sub>19</sub>H<sub>29</sub>BO<sub>2</sub>: 300.2261, found: 300.2273.

Boronate (*S*)-**2b** was oxidized to alcohol (*S*)-**3b** via General Procedure C. The enantiomeric excess was determined to be 84% (run 1: 84% ee; run 2: 84% ee) by chiral HPLC analysis (CHIRALPAK IB, 1 mL/min, 4% *i*-PrOH/hexanes,  $\lambda = 254$  nm);  $t_R$ (major) = 8.743 min,  $t_R$ (minor) = 9.345 min. The spectral data of this alcohol matched that of alcohol **3b** as prepared via General Procedure F (see below).

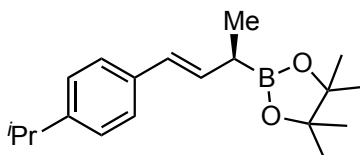

**(*R,E*)-2-(4-(4-isopropylphenyl)but-3-en-2-yl)-4,4,5,5-tetramethyl-1,3,2-dioxaborolane ((*R*)-2b).** Prepared via General Procedure B using pivalate **1b** (prepared in 92% ee). The crude mixture was purified by silica gel chromatography (0–4% Et<sub>2</sub>O/hexanes) to give (*R*)-**2b** (run 1: 90.1 mg,  $\alpha:\gamma = 10:1$ , 75%; run 2: 97.5 mg, 81%,  $\alpha:\gamma = 10:1$ ) as a colorless oil.  $[\alpha]_D^{24} = -12.4$  (c 2.6, CHCl<sub>3</sub>). The spectral data of this compound matches that described above.



Boronate (*R*)-**2b** was oxidized to alcohol (*R*)-**3b** via General Procedure C. The enantiomeric excess was determined to be 84% (run 1: 84% ee; run 2: 83% ee) by chiral HPLC analysis (CHIRALPAK IB, 1 mL/min, 4% *i*-PrOH/hexanes,  $\lambda=254$  nm);  $t_R(\text{major}) = 9.363$  min,  $t_R(\text{minor}) = 8.748$  min. The spectral data of this alcohol matched that of alcohol **3b** as prepared via General Procedure F (see below).

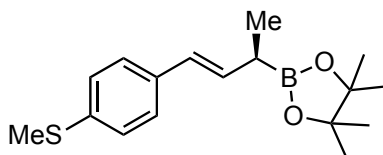

**(*R,E*)-4,4,5,5-tetramethyl-2-(4-(4-(methylthio)phenyl)but-3-en-2-yl)-1,3,2-dioxaborolane ((*R*)-**2c**).** Prepared via General Procedure A using pivalate **1c** (prepared in 93% ee). The crude mixture was purified by silica gel chromatography (0–2% Et<sub>2</sub>O/hexanes) to give (*R*)-**2c** (run 1: 75.6 mg,  $\alpha:\gamma=20:1$ , 62%; run 2: 78 mg,  $\alpha:\gamma=15:1$  64%) as pale yellow, waxy solid.  $[\alpha]_D^{24} = +10.9$  (c 2.84, CHCl<sub>3</sub>); <sup>1</sup>H NMR (600 MHz, CDCl<sub>3</sub>)  $\delta$  7.27 (d,  $J = 8.4$  Hz, 2H), 7.20 – 7.17 (m, 2H), 6.33 – 6.26 (m, 2H), 2.47 (s, 3H), 2.08 – 2.01 (m, 1H), 1.24 (s, 12H), 1.18 (d,  $J = 7.3$  Hz, 3H); <sup>13</sup>C NMR (151 MHz, CDCl<sub>3</sub>)  $\delta$  136.2, 135.7, 133.1, 127.2, 127.1, 126.5, 83.4, 24.9, 24.8, 16.4, 15.0;<sup>3</sup> <sup>11</sup>B NMR (193 MHz, CDCl<sub>3</sub>)  $\delta$  33.2. FTIR (NaCl/thin film) 2976, 2924, 2871, 1652, 1558, 1493, 1373, 1321, 1143, 966 cm<sup>-1</sup>; HRMS (LIFDI) [M]<sup>+</sup> calculated for C<sub>17</sub>H<sub>25</sub>BO<sub>2</sub>S: 304.1668, found: 304.1680.

Boronate (*R*)-**2c** was oxidized to alcohol (*R*)-**3c** via General Procedure C. The enantiomeric excess was determined to be 88% (run 1: 88% ee; run 2: 88% ee) by chiral HPLC analysis (CHIRALPAK IC, 1 mL/min, 6% *i*-PrOH/hexanes,  $\lambda=254$  nm);  $t_R(\text{major}) = 13.108$  min,  $t_R(\text{minor}) = 15.130$  min. The spectral data of this alcohol matched that of alcohol **3c** as prepared via General Procedure F (see below).

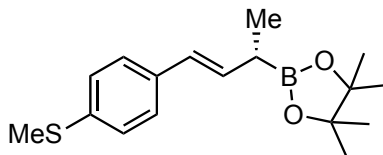

**(*S,E*)-4,4,5,5-tetramethyl-2-(4-(4-(methylthio)phenyl)but-3-en-2-yl)-1,3,2-dioxaborolane ((*S*)-**2c**).** Prepared via General Procedure B using pivalate **1c** (prepared in

93% ee). The crude mixture was purified by silica gel chromatography (0–2% Et<sub>2</sub>O/hexanes) to give (*S*)-**2c** (run 1: 76.8 mg,  $\alpha$ : $\gamma$ =6:1, 63%; run 2: 70.7 mg,  $\alpha$ : $\gamma$ =7:1, 58%) as pale yellow, waxy solid.  $[\alpha]_D^{24} = -10.4$  (c 2.30, CHCl<sub>3</sub>). The spectral data of this compound matches that described above.

Boronate (*S*)-**2c** was oxidized to alcohol (*S*)-**3c** via General Procedure C. The enantiomeric excess was determined to be 86% (run 1: 87% ee; run 2: 84% ee) by chiral HPLC analysis (CHIRALPAK IC, 1 mL/min, 6% *i*-PrOH/hexanes,  $\lambda$ =254 nm);  $t_R$ (major) = 15.145 min,  $t_R$ (minor) = 13.127 min. The spectral data of this alcohol matched that of alcohol **3c** as prepared via General Procedure F (see below).

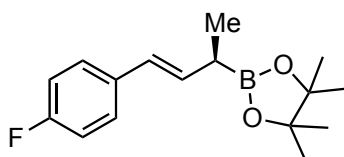

**(*R,E*)-2-(4-(4-fluorophenyl)but-3-en-2-yl)-4,4,5,5-tetramethyl-1,3,2-dioxaborolane ((*R*)-**2d**)**. Prepared via General Procedure A using pivalate **1d** (prepared in 97% ee). The crude mixture was purified by silica gel chromatography (0–2% Et<sub>2</sub>O/hexanes) to give (*R*)-**2d** (run 1: 77.5 mg, 70%,  $\alpha$ : $\gamma$ =20:1; run 2: 88.8 mg,  $\alpha$ : $\gamma$ >20:1, 80%) as pale yellow oil.  $[\alpha]_D^{24} = +7.4$  (c 2.4, CHCl<sub>3</sub>); <sup>1</sup>H NMR (600 MHz, CDCl<sub>3</sub>)  $\delta$  7.33 – 7.27 (m, 2H), 6.99 – 6.94 (m, 2H), 6.31 (d,  $J = 15.9$  Hz, 1H), 6.24 (dd,  $J = 15.9, 7.3$  Hz, 1H), 2.07 – 2.01 (m, 1H), 1.24 (s, 12H), 1.18 (d,  $J = 7.2$  Hz, 3H); <sup>13</sup>C NMR (151 MHz, CDCl<sub>3</sub>)  $\delta$  161.8 (d,  $J_{C-F} = 245.1$  Hz), 134.6 (d,  $J_{C-F} = 3.2$  Hz), 133.2 (d,  $J_{C-F} = 2.2$  Hz, olefin carbon), 127.4 (d,  $J_{C-F} = 7.8$  Hz), 126.6, 115.3 (d,  $J_{C-F} = 21.3$  Hz), 83.5, 24.87, 24.81, 15.0;<sup>3</sup> <sup>11</sup>B NMR (193 MHz, CDCl<sub>3</sub>)  $\delta$  33.1; FTIR (NaCl/thin film) 2979, 2923, 1652, 159, 1507, 1456, 1373, 1226, 1145, 982, 851, 699 cm<sup>-1</sup>; HRMS (LIFDI) [M]<sup>+</sup> calculated for C<sub>16</sub>H<sub>22</sub>BFO<sub>2</sub>: 276.1697, found: 276.1674.

Boronate (*R*)-**2d** was oxidized to alcohol (*R*)-**3d** via General Procedure C. The enantiomeric excess was determined to be 95% (run 1: 95% ee; run 2: 94% ee) by chiral HPLC analysis (CHIRALPAK IA, 0.7 mL/min, 2% *i*-PrOH/hexanes,  $\lambda$ =254 nm);  $t_R$ (major) = 29.973 min,  $t_R$ (minor) = 28.727 min. The spectral data of this alcohol matched that of alcohol **3d** as prepared via General Procedure E (see below).

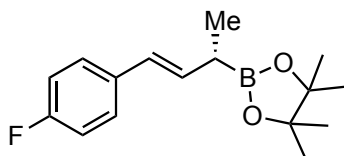

**(*S,E*)-2-(4-(4-fluorophenyl)but-3-en-2-yl)-4,4,5,5-tetramethyl-1,3,2-dioxaborolane**

**((*S*)-2d).** Prepared via General Procedure B using pivalate **1d** (prepared in 97% ee). The crude mixture was purified by silica gel chromatography (0–2% Et<sub>2</sub>O/hexanes) to give (*S*)-**2d** (run 1: 82.2 mg,  $\alpha$ : $\gamma$ =7:1, 74%; run 2: 70.7 mg,  $\alpha$ : $\gamma$ =6:1, 67%) as pale yellow oil.  $[\alpha]_D^{24} = -8.5$  (c 2.35, CHCl<sub>3</sub>). The spectral data of this compound matches that described above.

Boronate (*S*)-**2d** was oxidized to alcohol (*S*)-**3d** via General Procedure C. The enantiomeric excess was determined to be 89% (run 1: 89% ee; run 2: 88% ee) by chiral HPLC analysis (CHIRALPAK IA, 0.7 mL/min, 2% *i*-PrOH/hexanes,  $\lambda$ =254 nm);  $t_R$ (major) = 28.547 min,  $t_R$ (minor) = 29.818 min. The spectral data of this alcohol matched that of alcohol **3d** as prepared via General Procedure E (see below).

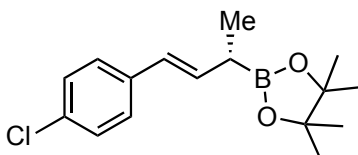

**(*S,E*)-2-(4-(4-chlorophenyl)but-3-en-2-yl)-4,4,5,5-tetramethyl-1,3,2-dioxaborolane**

**((*S*)-2e).** Prepared via General Procedure A using pivalate **1e** (prepared in 96% ee). The crude mixture was purified by silica gel chromatography (0–2% Et<sub>2</sub>O/hexanes) to give (*S*)-**2e** (run 1: 78 mg, 67%,  $\alpha$ : $\gamma$ >20:1; run 2: 75.6 mg,  $\alpha$ : $\gamma$ >20:1, 65%) as pale yellow, waxy solid.  $[\alpha]_D^{24} = -5.9$  (c 2.52, CHCl<sub>3</sub>): <sup>1</sup>H NMR (600 MHz, CDCl<sub>3</sub>)  $\delta$  7.29 – 7.25 (m, 2H), 7.25 – 7.21 (m, 2H), 6.35 – 6.26 (m, 2H), 2.08 – 2.02 (m, 1H) 1.24 (s, 12H), 1.18 (d,  $J = 7.3$  Hz, 3H); <sup>13</sup>C NMR (151 MHz, CDCl<sub>3</sub>)  $\delta$  136.9, 134.3, 132.1, 128.6, 127.2, 126.6, 83.5, 24.9, 24.8, 14.9;<sup>3</sup> <sup>11</sup>B NMR (193 MHz, CDCl<sub>3</sub>)  $\delta$  33.1; FTIR (NaCl/thin film) 2978, 2931, 2874, 1653, 1490, 1373, 1324, 1143, 1090, 854, 807 cm<sup>-1</sup>; HRMS (LIFDI) [M]<sup>+</sup> calculated for C<sub>16</sub>H<sub>22</sub>BClO<sub>2</sub>: 292.1401, found: 292.1376.

Boronate (*S*)-**2e** was oxidized to alcohol (*S*)-**3e** via General Procedure C. The enantiomeric excess was determined to be 87% (run 1: 88% ee; run 2: 86% ee) by chiral

HPLC analysis (CHIRALPAK IA, 1 mL/min, 2% *i*-PrOH/hexanes,  $\lambda=254$  nm);  $t_R(\text{major}) = 22.413$  min,  $t_R(\text{minor}) = 25.711$  min. The spectral data of this alcohol matched that of alcohol **3e** as prepared via General Procedure E (see below).

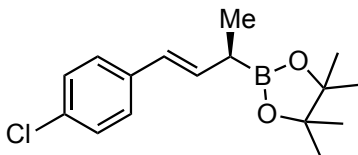

**(*R,E*)-2-(4-(4-chlorophenyl)but-3-en-2-yl)-4,4,5,5-tetramethyl-1,3,2-dioxaborolane**

**((*R*)-**2e**).** Prepared via General Procedure B using pivalate **1e** (prepared in 97% ee) except with 5 mol% Ni(cod)<sub>2</sub> and 11 mol % BnPPH<sub>2</sub> for 29 h. The crude mixture was purified by silica gel chromatography (0–2% Et<sub>2</sub>O/hexanes) to give (*R*)-**2e** (run 1: 60.7 mg,  $\alpha:\gamma=8:1$ , 52%; run 2: 59 mg,  $\alpha:\gamma=5:1$ , 50%) as pale yellow oil.  $[\alpha]_D^{24} = +6.7$  (c 1.92, CHCl<sub>3</sub>). The spectral data of this compound matches that described above.

Boronate (*R*)-**2e** was oxidized to alcohol (*R*)-**3e** via General Procedure C. The enantiomeric excess was determined to be 82% (run 1: 82% ee; run 2: 81% ee) by chiral HPLC analysis (CHIRALPAK IA, 1 mL/min, 2% *i*-PrOH/hexanes,  $\lambda=254$  nm);  $t_R(\text{major}) = 25.679$  min,  $t_R(\text{minor}) = 22.319$  min. The spectral data of this alcohol matched that of alcohol **3e** as prepared via General Procedure E (see below).

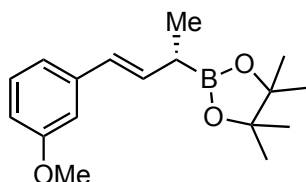

**(*S,E*)-2-(4-(3-methoxyphenyl)but-3-en-2-yl)-4,4,5,5-tetramethyl-1,3,2-dioxaborolane**

**((*S*)-**2f**).** Prepared via General Procedure A using pivalate **1f** (prepared in 98% ee). The crude mixture was purified by silica gel chromatography (2–5% Et<sub>2</sub>O/hexanes) to give (*S*)-**2f** (run 1: 76.1 mg, 66%,  $\alpha:\gamma=14:1$ ; run 2: 81 mg,  $\alpha:\gamma=13:1$ , 70%) as a colorless oil.  $[\alpha]_D^{24} = +8.5$  (c 1.63, CHCl<sub>3</sub>): <sup>1</sup>H NMR (600 MHz, CDCl<sub>3</sub>)  $\delta$  7.22 – 7.17 (m, 1H), 6.94 (d,  $J = 7.7$  Hz, 1H), 6.91 – 6.88 (m, 1H), 6.73 (dd,  $J = 8.2, 2.5$  Hz, 1H), 6.38 – 6.29 (m, 2H), 3.81 (s, 3H), 2.08 – 2.02 (m, 1H), 1.24 (s, 12H), 1.19 (d,  $J = 7.3$  Hz, 3H); <sup>13</sup>C NMR (151 MHz, CDCl<sub>3</sub>)  $\delta$  159.9, 139.9, 133.8, 129.5, 127.7, 118.8, 112.3, 111.3, 83.4, 55.3,

24.9, 24.8, 15.0;<sup>3</sup> <sup>11</sup>B NMR (193 MHz, CDCl<sub>3</sub>) δ 33.1; FTIR (NaCl/thin film) 2977, 1653, 1558, 1506, 1456, 1147, 980, 668 cm<sup>-1</sup>; HRMS (LIFDI) [M]<sup>+</sup> calculated for C<sub>17</sub>H<sub>25</sub>BO<sub>3</sub>: 288.1897, found: 288.1915.

Boronate (*S*)-**2f** was oxidized to alcohol (*S*)-**3f** via General Procedure C. The enantiomeric excess was determined to be 95% (run 1: 95% ee; run 2: 94% ee) by chiral HPLC analysis (CHIRALPAK IC, 1 mL/min, 5% *i*-PrOH/hexanes, λ=254 nm); t<sub>R</sub>(major) = 17.987 min, t<sub>R</sub>(minor) = 20.193 min. The spectral data of this alcohol matched that of alcohol **3f** as prepared via General Procedure F (see below).

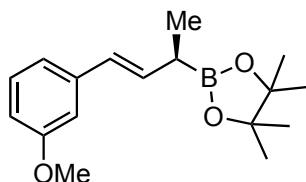

**(*R,E*)-2-(4-(3-methoxyphenyl)but-3-en-2-yl)-4,4,5,5-tetramethyl-1,3,2-dioxaborolane ((*R*)-**2f**)**. Prepared via General Procedure B using pivalate **1f** (prepared in 98% ee). The crude mixture was purified by silica gel chromatography (2–5% Et<sub>2</sub>O/hexanes) to give (*R*)-**2f** (run 1: 82.7 mg, α:γ=6:1, 72%; run 2: 78 mg, α:γ=6:1, 68%) as a colorless oil. [α]<sub>D</sub><sup>24</sup> = -5.3 (c 2.05, CHCl<sub>3</sub>). The spectral data of this compound matches that described above.

Boronate (*R*)-**2f** was oxidized to alcohol (*R*)-**3f** via General Procedure C. The enantiomeric excess was determined to be 90% (run 1: 90% ee; run 2: 89% ee) by chiral HPLC analysis (CHIRALPAK IC, 1 mL/min, 5% *i*-PrOH/hexanes, λ=254 nm); t<sub>R</sub>(major) = 20.030 min, t<sub>R</sub>(minor) = 17.856 min. The spectral data of this alcohol matched that of alcohol **3f** as prepared via General Procedure F (see below).

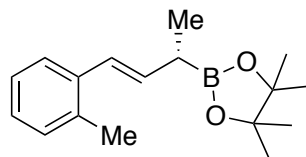

**(*S,E*)-4,4,5,5-Tetramethyl-2-(4-(*o*-tolyl)but-3-en-2-yl)-1,3,2-dioxaborolane ((*S*)-**2g**)**. Prepared via General Procedure A using pivalate **1g** (prepared in 94% ee), except with 5 mol % Ni(cod)<sub>2</sub> and 5.5 mol % *t*-BuXantPhos. The crude mixture was purified by silica

gel chromatography (0–2% Et<sub>2</sub>O/hexanes) to give (*S*)-**2g** (run 1: 80.4 mg,  $\alpha:\gamma=10:1$ , 74%; run 2: 77.4 mg,  $\alpha:\gamma=15:1$ , 71%) as a colorless oil.  $[\alpha]_D^{24} = +18.2$  (c 0.95, MeOH): <sup>1</sup>H NMR (600 MHz, CDCl<sub>3</sub>)  $\delta$  7.34 (d,  $J = 7.4$  Hz, 1H), 7.06 – 7.02 (m, 3H), 6.46 (d,  $J = 15.8$  Hz, 1H), 6.12 (dd,  $J = 15.7, 7.7$  Hz, 1H), 2.25 (s, 3H), 2.07 – 1.95 (m, 1H), 1.18 (s, 12H), 1.13 (d,  $J = 7.3$  Hz, 3H); <sup>13</sup>C NMR (151 MHz, CDCl<sub>3</sub>)  $\delta$  137.4, 134.8, 134.7, 130.1, 126.5, 125.9, 125.5, 125.4, 83.2, 27.2, 24.74, 24.70, 19.9, 15.0; <sup>11</sup>B NMR (193 MHz, CDCl<sub>3</sub>)  $\delta$  33.3; FTIR (NaCl/thin film) 2976, 1457, 1321, 1143, 966, 749 cm<sup>-1</sup>; HRMS (LIFDI) [M]<sup>+</sup> calculated for C<sub>17</sub>H<sub>24</sub>BO<sub>2</sub>: 271.1869, found: 271.1873.

Boronate (*S*)-**2g** was oxidized to alcohol (*S*)-**3g** via General Procedure C. The enantiomeric excess was determined to be 93% (run 1: 93% ee; run 2: 92% ee) by chiral HPLC analysis (CHIRALPAK IB, 1.0 mL/min, 3% *i*-PrOH/hexanes,  $\lambda=254$  nm);  $t_R(\text{major}) = 16.057$  min,  $t_R(\text{minor}) = 24.458$  min. The spectral data of this alcohol matched that of alcohol **3g** as prepared via General Procedure F (see below).

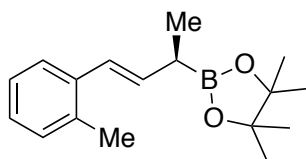

**(*R,E*)-4,4,5,5-Tetramethyl-2-(4-(*o*-tolyl)but-3-en-2-yl)-1,3,2-dioxaborolane ((*R*)-**2g**).**

Prepared via General Procedure B using pivalate **1g** (prepared in 94% ee) except using 5 mol % Ni(cod)<sub>2</sub> and 11 mol % BnPPH<sub>2</sub>. The crude mixture was purified by silica gel chromatography (0–2% Et<sub>2</sub>O/hexanes) to give (*R*)-**2g** (run 1: 83.4 mg,  $\alpha:\gamma=10:1$ , 78%; run 2: 80.2 mg,  $\alpha:\gamma=13:1$ , 75%) as a colorless oil.  $[\alpha]_D^{24} = -22.6$  (c 0.83, CHCl<sub>3</sub>). The spectral data of this compound matches that described above.

Boronate (*R*)-**2g** was oxidized to alcohol (*R*)-**3g** via General Procedure C. The enantiomeric excess was determined to be 84% (run 1: 83% ee; run 2: 84% ee) by chiral HPLC analysis (CHIRALPAK IB, 1.0 mL/min, 3% *i*-PrOH/hexanes,  $\lambda=254$  nm);  $t_R(\text{major}) = 24.786$  min,  $t_R(\text{minor}) = 16.280$  min. The spectral data of this alcohol matched that of alcohol **3g** as prepared via General Procedure F (see below).

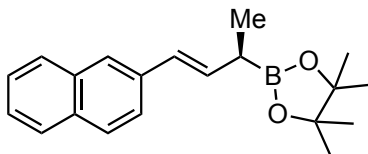

**(*R,E*)-4,4,5,5-tetramethyl-2-(4-(naphthalen-2-yl)but-3-en-2-yl)-1,3,2-dioxaborolane ((*R*)-2h).** Prepared via General Procedure A using pivalate **1h** (prepared in 97% ee). The crude mixture was purified by silica gel chromatography (0–3% Et<sub>2</sub>O/hexanes) to give (*R*)-**2h** (run 1: 108.5 mg, 88%,  $\alpha:\gamma > 20:1$ ; run 2: 99.7 mg,  $\alpha:\gamma > 20:1$ , 81%) as off-white solid (mp 78–81°C).  $[\alpha]_D^{24} = +10.8$  (c 1.58, CHCl<sub>3</sub>): <sup>1</sup>H NMR (600 MHz, CDCl<sub>3</sub>)  $\delta$  7.77 – 7.73 (m, 3H), 7.67 (s, 1H), 7.59 (dd,  $J = 8.5, 1.6$  Hz, 1H), 7.45 – 7.37 (m, 2H), 6.55 – 6.44 (m, 2H), 2.16 – 2.10 (m, 1H), 1.26 (s, 12H), 1.24 (d,  $J = 7.3$  Hz, 3H); <sup>13</sup>C NMR (151 MHz, CDCl<sub>3</sub>)  $\delta$  135.9, 134.0, 133.9, 132.7, 128.0, 127.93, 127.91, 127.7, 126.2, 125.4, 125.2, 123.9, 83.5, 24.9, 24.8, 15.0;<sup>3</sup> <sup>11</sup>B NMR (193 MHz, CDCl<sub>3</sub>)  $\delta$  33.3; FTIR (NaCl/thin film) 2980, 2920, 1683, 1635, 1558, 1506, 1456, 1142, 667 cm<sup>-1</sup>; HRMS (LIFDI) [M]<sup>+</sup> calculated for C<sub>20</sub>H<sub>25</sub>BO<sub>2</sub>: 308.1948, found: 308.1947.

Boronate (*R*)-**2h** was oxidized to alcohol (*R*)-**3h** via General Procedure C. The enantiomeric excess was determined to be 91% (run 1: 91% ee; run 2: 90% ee) by chiral HPLC analysis (CHIRALPAK IC, 1 mL/min, 3% *i*-PrOH/hexanes,  $\lambda = 254$  nm);  $t_R$ (major) = 21.293 min,  $t_R$ (minor) = 23.576 min. The spectral data of this alcohol matched that of alcohol **3h** as prepared via General Procedure E (see below).

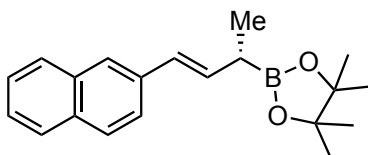

**(*S,E*)-4,4,5,5-tetramethyl-2-(4-(naphthalen-2-yl)but-3-en-2-yl)-1,3,2-dioxaborolane ((*S*)-2h).** Prepared via General Procedure B using pivalate **1h** (prepared in 97% ee). The crude mixture was purified by silica gel chromatography (0–3% Et<sub>2</sub>O/hexanes) to give (*S*)-**2h** (run 1: 64.1 mg,  $\alpha:\gamma = 9:1$ , 52%; run 2: 67.8 mg,  $\alpha:\gamma = 7:1$ , 55%) as off-white solid (mp 78–81°C).  $[\alpha]_D^{24} = -9.1$  (c 3.08, CHCl<sub>3</sub>). The spectral data of this compound matches that described above.

Boronate (*S*)-**2h** was oxidized to alcohol (*S*)-**3h** via General Procedure C. The enantiomeric excess was determined to be 88% (run 1: 88% ee; run 2: 87% ee) by chiral HPLC analysis (CHIRALPAK IC, 1 mL/min, 3% *i*-PrOH/hexanes,  $\lambda=254$  nm);  $t_R$ (major) = 23.494 min,  $t_R$ (minor) = 21.244 min. The spectral data of this alcohol matched that of alcohol **3h** as prepared via General Procedure E (see below).

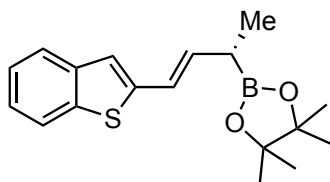

**(*S,E*)-2-(4-(benzothiophen-2-yl)but-3-en-2-yl)-4,4,5,5-tetramethyl-1,3,2-dioxaborolane ((*S*)-**2i**).** Prepared via General Procedure A using pivalate **1i** (prepared in 70% ee) except on a 0.30 mmol scale. The crude mixture was purified by silica gel chromatography (0–4% Et<sub>2</sub>O/hexanes) to give (*S*)-**2i** (60 mg, 64%,  $\alpha$ : $\gamma$ >20:1) as a pale yellow, waxy solid.  $[\alpha]_D^{24} = +10.7$  (c 1.9, CHCl<sub>3</sub>): <sup>1</sup>H NMR (600 MHz, CDCl<sub>3</sub>)  $\delta$  7.72 (d,  $J = 7.9$  Hz, 1H), 7.63 (d,  $J = 7.6$  Hz, 1H), 7.28 (dd,  $J = 7.2, 0.9$  Hz, 1H), 7.25 – 7.22 (m, 1H), 7.03 (s, 1H), 6.61 – 6.55 (m, 1H), 6.29 (dd,  $J = 15.6, 7.6$  Hz, 1H), 2.11 – 2.06 (m, 1H), 1.25 (s, 12H), 1.21 (d,  $J = 7.2$  Hz, 3H); <sup>13</sup>C NMR (151 MHz, CDCl<sub>3</sub>)  $\delta$  144.0, 140.5, 138.6, 136.5, 124.3, 124.2, 123.2, 122.2, 121.9, 120.8, 83.6, 24.9, 24.8, 14.7;<sup>3</sup> <sup>11</sup>B NMR (193 MHz, CDCl<sub>3</sub>)  $\delta$  33.2; FTIR (NaCl/thin film) 2978, 1652, 1558, 1457, 1373, 1144, 981, 851 cm<sup>-1</sup>; HRMS (CI<sup>+</sup>) [M]<sup>+</sup>+H calculated for C<sub>18</sub>H<sub>24</sub>BO<sub>2</sub>S: 315.1590, found: 315.1591.

Boronate (*S*)-**2i** was oxidized to alcohol (*S*)-**3i** via General Procedure C. The enantiomeric excess was determined to be 68% by chiral HPLC analysis (CHIRALPAK IC, 1 mL/min, 3% *i*-PrOH/hexanes,  $\lambda=254$  nm);  $t_R$ (major) = 21.095 min,  $t_R$ (minor) = 23.755 min. The spectral data of this alcohol matched that of alcohol **3i** as prepared via General Procedure F (see below).

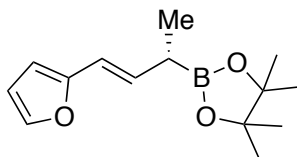



**(*S,E*)-2-(4-(Furan-2-yl)but-3-en-2-yl)-4,4,5,5-tetramethyl-1,3,2-dioxaborolane ((*S*)-**2j**).** Prepared via General Procedure A using pivalate **1j** (prepared in 99% ee). The crude mixture was purified by silica gel chromatography (0–2% Et<sub>2</sub>O/hexanes) to give (*S*)-**2j** (run 1: 39.1 mg,  $\alpha:\gamma > 20:1$ , 39%; run 2: 48.7 mg,  $\alpha:\gamma > 20:1$ , 48%) as colorless oil.  $[\alpha]_D^{24} = +24.0$  (c 0.71, MeOH): <sup>1</sup>H NMR (600 MHz, CDCl<sub>3</sub>)  $\delta$  7.29 (m, 1H), 6.33 – 6.26 (m, 2H), 6.18 (dd,  $J = 16.0, 1.4$  Hz, 1H), 6.10 (d,  $J = 3.2$  Hz, 1H), 2.05 – 1.99 (m, 1H), 1.24 (s, 12H), 1.17 (d,  $J = 7.3$  Hz, 3H); <sup>13</sup>C NMR (151 MHz, CDCl<sub>3</sub>)  $\delta$  153.8, 140.9, 132.4, 116.5, 111.0, 105.4, 83.3, 24.7, 24.7, 14.6;<sup>3</sup> <sup>11</sup>B NMR (193 MHz, CDCl<sub>3</sub>)  $\delta$  33.3; FTIR (NaCl/thin film) 2977, 1457, 1373, 1351, 1323, 1143, 1011, 964, 728 cm<sup>-1</sup>; HRMS (LIFDI) [M]<sup>+</sup> calculated for C<sub>14</sub>H<sub>21</sub>BO<sub>3</sub>: 248.1584, found: 248.1577.

Boronate (*S*)-**2j** was oxidized to alcohol (*S*)-**3j** via General Procedure C. The enantiomeric excess was determined to be 92% (run 1: 91% ee; run 2: 92% ee) by chiral HPLC analysis (CHIRALCEL OD–H, 1.0 mL/min, 2% *i*-PrOH/hexanes,  $\lambda=254$  nm);  $t_R(\text{major}) = 22.253$  min,  $t_R(\text{minor}) = 25.273$  min. The spectral data of this alcohol matched that of alcohol **3j** as prepared via General Procedure F (see below).

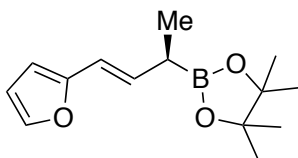

**(*R,E*)-2-(4-(Furan-2-yl)but-3-en-2-yl)-4,4,5,5-tetramethyl-1,3,2-dioxaborolane ((*R*)-**2j**).** Prepared via General Procedure B using pivalate **1j** (prepared in 99% ee). The crude mixture was purified by silica gel chromatography (0–2% Et<sub>2</sub>O/hexanes) to give (*R*)-**2j** (run 1: 29.2 mg,  $\alpha:\gamma=11:1$ , 30%; run 2: 31.6 mg,  $\alpha:\gamma=14:1$ , 31%) as a colorless oil.  $[\alpha]_D^{24} = -26.8$  (c 0.6, CHCl<sub>3</sub>). The spectral data of this compound matches that described above.

Boronate (*R*)-**2j** was oxidized to alcohol (*R*)-**3j** via General Procedure C. The enantiomeric excess was determined to be 77% (run 1: 77% ee; run 2: 76% ee) by chiral HPLC analysis (CHIRALCEL OD–H, 1.0 mL/min, 2% *i*-PrOH/hexanes,  $\lambda=254$  nm);  $t_R(\text{major}) = 24.874$  min,  $t_R(\text{minor}) = 22.002$  min. The spectral data of this alcohol matched that of alcohol **3j** as prepared via General Procedure F (see below).

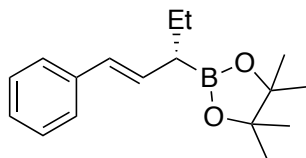

**(*S,E*)-4,4,5,5-Tetramethyl-2-(1-phenylpent-1-en-3-yl)-1,3,2-dioxaborolane ((*S*)-2k).**

Prepared via General Procedure A using pivalate **1k** (prepared in 99% ee). The crude mixture was purified by silica gel chromatography (0–2% Et<sub>2</sub>O/hexanes) to give (*S*)-**2k** (run 1: 94.0 mg,  $\alpha$ : $\gamma$ =10:1, 86%; run 2: 93.6 mg,  $\alpha$ : $\gamma$ =8:1, 86%) as colorless oil.  $[\alpha]_D^{24} = +26.8$  (c 0.87, MeOH): <sup>1</sup>H NMR (600 MHz, CDCl<sub>3</sub>)  $\delta$  7.35 – 7.33 (m, 2H), 7.29 – 7.27 (m, 2H), 7.18 – 7.15 (m, 1H), 6.36 (d,  $J = 15.7$  Hz, 1H), 6.22 (dd,  $J = 15.8, 9.0$  Hz, 1H), 1.93 – 1.89 (m, 1H), 1.72 – 1.65 (m, 1H), 1.58 – 1.51 (m, 1H), 1.25 (s, 6H), 1.24 (s, 6H), 0.95 (t,  $J = 7.4$  Hz, 3H); <sup>13</sup>C NMR (151 MHz, CDCl<sub>3</sub>)  $\delta$  138.3, 131.9, 129.1, 128.4, 126.5, 125.9, 83.2, 24.8, 24.6, 24.0, 13.7;<sup>3</sup> <sup>11</sup>B NMR (193 MHz, CDCl<sub>3</sub>)  $\delta$  33.0; FTIR (NaCl/thin film) 2977, 1371, 1321, 1143, 967, 749, 694 cm<sup>-1</sup>; HRMS (LIFDI) [M]<sup>+</sup> calculated for C<sub>17</sub>H<sub>25</sub>BO<sub>2</sub>: 272.1948, found: 272.1924.

Boronate (*S*)-**2k** was oxidized to alcohol (*S*)-**3k** via General Procedure C. The enantiomeric excess was determined to be 98% (run 1: 98% ee; run 2: 98% ee) by chiral HPLC analysis (CHIRALPAK IB, 1.0 mL/min, 2% *i*-PrOH/hexanes,  $\lambda$ =254 nm);  $t_R$ (major) = 17.361 min,  $t_R$ (minor) = 28.554 min. The spectral data of this alcohol matched that of alcohol **3k** as prepared via General Procedure F (see below).

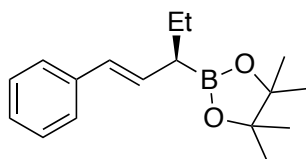

**(*R,E*)-4,4,5,5-Tetramethyl-2-(1-phenylpent-1-en-3-yl)-1,3,2-dioxaborolane ((*R*)-2k).**

Prepared via General Procedure B using pivalate **1k** (prepared in 99% ee). The crude mixture was purified by silica gel chromatography (0–2% Et<sub>2</sub>O/hexanes) to give (*R*)-**2k** (run 1: 95.0 mg,  $\alpha$ : $\gamma$ =8:1, 87%; run 2: 93.9 mg,  $\alpha$ : $\gamma$ =8:1, 86%) as colorless oil.  $[\alpha]_D^{24} = -22.1$  (c 0.95, CHCl<sub>3</sub>). The spectral data of this compound matches that described above.

Boronate (*R*)-**2k** was oxidized to alcohol (*R*)-**3k** via General Procedure C. The enantiomeric excess was determined to be 91% (run 1: 91% ee; run 2: 90% ee) by chiral

HPLC analysis (CHIRALPAK IB, 1.0 mL/min, 2% *i*-PrOH/hexanes,  $\lambda=254$  nm);  $t_R(\text{major}) = 28.625$  min,  $t_R(\text{minor}) = 17.498$  min. The spectral data of this alcohol matched that of alcohol **3k** as prepared via General Procedure F (see below).

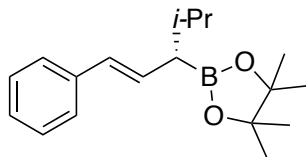

**(*S,E*)-4,4,5,5-Tetramethyl-2-(4-methyl-1-phenylpent-1-en-3-yl)-1,3,2-dioxaborolane ((*S*)-2I).** Prepared via General Procedure A using pivalate **11** (prepared in 99% ee), except using 5 mol % Ni(cod)<sub>2</sub> and 5.5 mol % *t*-BuXantPhos at 40 °C. The crude mixture was purified by silica gel chromatography (0–2% Et<sub>2</sub>O/hexanes) to give (*S*)-**2I** (run 1: 89.8 mg,  $\alpha:\gamma=2:1$ , 78%; run 2: 91.0 mg,  $\alpha:\gamma=2:1$ , 79%) as colorless oil.  $[\alpha]_D^{24} = +15.7$  (c 0.36, MeOH): <sup>1</sup>H NMR (600 MHz, CDCl<sub>3</sub>,  $\alpha$ -isomer)  $\delta$  7.35 – 7.34 (m, 2H), 7.29 – 7.27 (m, 2H), 7.18 – 7.17 (m, 1H), 6.35 (d,  $J = 15.8$  Hz, 1H), 6.19 (dd,  $J = 15.8, 9.9$  Hz, 1H), 1.95 – 1.93 (m, 1H), 1.74 (t,  $J = 9.3$  Hz, 1H), 1.25 (s, 6H), 1.24 (s, 6H), 1.00 – 0.97 (m, 6H); <sup>13</sup>C NMR (151 MHz, CDCl<sub>3</sub>,  $\alpha$  and  $\gamma$  mixture)  $\delta$  142.3, 138.3, 131.1, 130.0, 128.42, 128.37, 128.3, 128.2, 126.7, 126.5, 125.9, 125.2, 83.4, 83.2, 31.2, 30.0, 24.74, 24.66, 24.5, 22.7, 22.6, 22.1; <sup>11</sup>B NMR (193 MHz, CDCl<sub>3</sub>)  $\delta$  32.6; FTIR (NaCl/thin film) 2977, 1371, 1320, 1142, 970, 853, 750, 695 cm<sup>-1</sup>; HRMS (LIFDI) [M]<sup>+</sup> calculated for C<sub>18</sub>H<sub>27</sub>BO<sub>2</sub>: 286.2104, found: 286.2131.

Boronate (*S*)-**2I** was oxidized to alcohol (*S*)-**3I** via General Procedure C. The enantiomeric excess was determined to be 98% (run 1: 97% ee; run 2: 98% ee) by chiral HPLC analysis (CHIRALPAK IB, 1.0 mL/min, 2% *i*-PrOH/hexanes,  $\lambda=254$  nm);  $t_R(\text{major}) = 14.739$  min,  $t_R(\text{minor}) = 22.980$  min. The spectral data of this alcohol matched that of alcohol **3I** as prepared via the General Procedure F (see below).

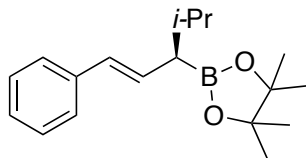

**(*R,E*)-4,4,5,5-Tetramethyl-2-(4-methyl-1-phenylpent-1-en-3-yl)-1,3,2-dioxaborolane ((*R*)-**2l**)**. Prepared via General Procedure B using pivalate **1l** (prepared in 99% ee), except using 5 mol % Ni(cod)<sub>2</sub> and 11 mol % *t*-BuXantPhos at 40 °C. The crude mixture was purified by silica gel chromatography (0–2% Et<sub>2</sub>O/hexanes) to give (*R*)-**2l** (run 1: 94.0 mg,  $\alpha:\gamma=3:2$ , 83%; run 2: 91.7 mg,  $\alpha:\gamma=7:5$ , 81%) as colorless oil.  $[\alpha]_D^{24} = -11.6$  (c 0.9, CHCl<sub>3</sub>). The spectral data of this compound matches that described above.

Boronate (*R*)-**2l** was oxidized to alcohol (*R*)-**3l** via General Procedure C. The enantiomeric excess was determined to be 80% (run 1: 79% ee; run 2: 80% ee) by chiral HPLC analysis (CHIRALPAK IB, 1.0 mL/min, 2% *i*-PrOH/hexanes,  $\lambda=254$  nm);  $t_R(\text{major}) = 22.643$  min,  $t_R(\text{minor}) = 14.374$  min. The spectral data of this alcohol matched that of alcohol **3l** General Procedure F (see below).

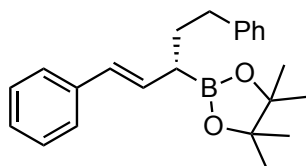

**(*S,E*)-2-(1,5-diphenylpent-1-en-3-yl)-4,4,5,5-tetramethyl-1,3,2-dioxaborolane ((*S*)-**2m**)**. Prepared via General Procedure A using pivalate **1m** (prepared in 99% ee). The crude mixture was purified by silica gel chromatography (0–2% Et<sub>2</sub>O/hexanes) to give (*S*)-**2f** (run 1: 104.7 mg, 75%,  $\alpha:\gamma=14:1$ ; run 2: 109.2 mg,  $\alpha:\gamma=14:1$ , 78%) as a white solid (mp 87–90 °C).  $[\alpha]_D^{24} = -20.4$  (c 4.4, CHCl<sub>3</sub>): <sup>1</sup>H NMR (600 MHz, CDCl<sub>3</sub>)  $\delta$  7.36 – 7.30 (m, 2H), 7.31 – 7.26 (m, 4H), 7.21 – 7.16 (m, 4H), 6.39 (d,  $J = 15.8$  Hz, 1H), 6.24 (dd,  $J = 15.8, 9.0$  Hz, 1H), 2.74 – 2.65 (m, 1H), 2.64 – 2.56 (m, 1H), 2.09 – 2.01 (m, 1H), 2.00 – 1.92 (m, 1H), 1.89 – 1.78 (m, 1H), 1.25 (s, 6H), 1.24 (s, 6H); <sup>13</sup>C NMR (151 MHz, CDCl<sub>3</sub>)  $\delta$  142.7, 138.3, 131.6, 129.7, 128.7, 128.6, 128.4, 126.8, 126.1, 125.8, 83.5, 35.6, 32.8, 24.9, 24.8;<sup>3</sup> <sup>11</sup>B NMR (193 MHz, CDCl<sub>3</sub>)  $\delta$  32.9; FTIR (NaCl/thin film) 3024, 2977, 2928, 1653, 1495, 1456, 1370, 1323, 1142, 967, 750 cm<sup>-1</sup>; HRMS (LIFDI) [M]<sup>+</sup> calculated for C<sub>23</sub>H<sub>29</sub>BO<sub>2</sub>: 348.2261, found: 348.2287.

Boronate (*S*)-**2m** was oxidized to alcohol (*S*)-**3m** via General Procedure C. The enantiomeric excess was determined to be 96% (run 1: 96% ee; run 2: 95% ee) by chiral HPLC analysis (CHIRALPAK IC, 1 mL/min, 2% *i*-PrOH/hexanes,  $\lambda=254$  nm);  $t_R(\text{major})$

= 22.971 min,  $t_R(\text{minor}) = 27.376$  min. The spectral data of this alcohol matched that of alcohol **3m** as prepared via General Procedure F (see below).

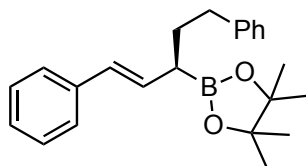

**(*R,E*)-2-(1,5-diphenylpent-1-en-3-yl)-4,4,5,5-tetramethyl-1,3,2-dioxaborolane ((*R*)-2m)**. Prepared via General Procedure B using pivalate **1m** (prepared in 99% ee). The crude mixture was purified by silica gel chromatography (0–2% Et<sub>2</sub>O/hexanes) to give (*R*)-**2m** (run 1: 107.6 mg,  $\alpha:\gamma=14:1$ , 77%; run 2: 112.3 mg,  $\alpha:\gamma=12:1$ , 81%) as a white solid (mp 87–90 °C).  $[\alpha]_D^{24} = +20.7$  (c 3.46, CHCl<sub>3</sub>). The spectral data of this compound matches that described above.

Boronate (*R*)-**2m** was oxidized to alcohol (*R*)-**3m** via General Procedure C. The enantiomeric excess was determined to be 92% (run 1: 92% ee; run 2: 92% ee) by chiral HPLC analysis (CHIRALPAK IC, 1 mL/min, 2% *i*-PrOH/hexanes,  $\lambda=254$  nm);  $t_R(\text{major}) = 27.197$  min,  $t_R(\text{minor}) = 22.849$  min. The spectral data of this alcohol matched that of alcohol **3m** as prepared via General Procedure F (see below).

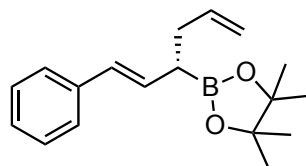

**(*S,E*)-4,4,5,5-tetramethyl-2-(1-phenylhexa-1,5-dien-3-yl)-1,3,2-dioxaborolane ((*S*)-2n)**. Prepared via General Procedure A using pivalate **1n** (prepared in 99% ee). The crude mixture was purified by silica gel chromatography (0–2% Et<sub>2</sub>O/hexanes) to give (*S*)-**2n** (run 1: 100 mg,  $\alpha:\gamma>20:1$ , 88%; run 2: 91.4 mg,  $\alpha:\gamma=18:1$ , 80%) as a pale yellow solid (mp 57–60 °C).  $[\alpha]_D^{24} = -2.8$  (c 3.19, CHCl<sub>3</sub>): <sup>1</sup>H NMR (600 MHz, CDCl<sub>3</sub>)  $\delta$  7.36 – 7.32 (m, 2H), 7.29 – 7.25 (m, 2H), 7.19 – 7.15 (m, 1H), 6.39 (d,  $J = 15.9$  Hz, 1H), 6.23 (dd,  $J = 15.9, 8.7$  Hz, 1H), 5.90 – 5.82 (m, 1H), 5.09 – 5.04 (m, 1H), 4.97 (dd,  $J = 10.2, 1.9$  Hz, 1H), 2.45 – 2.37 (m, 1H), 2.34 – 2.27 (m, 1H), 2.12 – 2.07 (m, 1H), 1.242 (s, 6H), 1.236 (s, 6H); <sup>13</sup>C NMR (151 MHz, CDCl<sub>3</sub>)  $\delta$  138.3, 138.1, 131.2, 129.4, 128.5, 126.7, 126.1,

115.3, 83.5, 35.2, 24.9, 24.8;<sup>3</sup> <sup>11</sup>B NMR (193 MHz, CDCl<sub>3</sub>) δ 32.8; FTIR (NaCl/thin film) 3024, 2977, 2928, 1653, 1495, 1456, 1370, 1323, 1142, 967, 750 cm<sup>-1</sup>; HRMS (LIFDI) [M]<sup>+</sup> calculated for C<sub>23</sub>H<sub>29</sub>BO<sub>2</sub>: 348.2261, found: 348.2287.

Boronate (*S*)-**2n** was oxidized to alcohol (*S*)-**3n** via General Procedure C. The enantiomeric excess was determined to be 77% (run 1: 75% ee; run 2: 79% ee) by chiral HPLC analysis (CHIRALPAK IC, 1 mL/min, 2% *i*-PrOH/hexanes, λ=254 nm); t<sub>R</sub>(major) = 15.203 min, t<sub>R</sub>(minor) = 17.382 min. The spectral data of this alcohol matched that of alcohol **3n** as prepared via General Procedure F (see below).

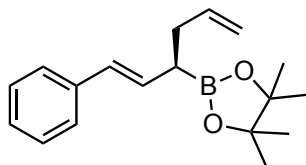

**(*R,E*)-4,4,5,5-tetramethyl-2-(1-phenylhexa-1,5-dien-3-yl)-1,3,2-dioxaborolane ((*R*)-**2n**)**. Prepared via General Procedure B using pivalate **1n** (prepared in 99% ee). The crude mixture was purified by silica gel chromatography (0–2% Et<sub>2</sub>O/hexanes) to give (*R*)-**2n** (run 1: 81.5 mg, α:γ=16:1, 72%; run 2: 80.5 mg, α:γ=20:1, 71%) as a white solid (mp 57–60 °C). [α]<sub>D</sub><sup>24</sup> = +13.6 (c 2.6, CHCl<sub>3</sub>). The spectral data of this compound matches that described above.

Boronate (*R*)-**2n** was oxidized to alcohol (*R*)-**3n** via General Procedure C. The enantiomeric excess was determined to be 88% (run 1: 89% ee; run 2: 87% ee) by chiral HPLC analysis (CHIRALPAK IC, 1 mL/min, 2% *i*-PrOH/hexanes, λ=254 nm); t<sub>R</sub>(major) = 17.361 min, t<sub>R</sub>(minor) = 15.181 min. The spectral data of this alcohol matched that of alcohol **3n** as prepared via General Procedure F (see below).

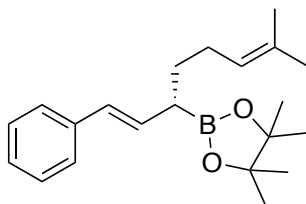

**(*S,E*)-4,4,5,5-Tetramethyl-2-(7-methyl-1-phenylocta-1,6-dien-3-yl)-1,3,2-dioxaborolane ((*S*)-**2o**)**. Prepared via General Procedure A using pivalate **1o** (prepared in 78% ee). The crude mixture was purified by silica gel chromatography (0–2%

Et<sub>2</sub>O/hexanes) to give (*S*)-**2o** (run 1: 122.8 mg,  $\alpha:\gamma=10:1$ , 94%; run 2: 119.9 mg,  $\alpha:\gamma=10:1$ , 92%) as colorless oil.  $[\alpha]_D^{24} = +21.2$  (c 1.18, MeOH); <sup>1</sup>H NMR (600 MHz, CDCl<sub>3</sub>)  $\delta$  7.34 – 7.33 (m, 2H), 7.29 – 7.27 (m, 2H), 7.18 – 7.15 (m, 1H), 6.36 (d,  $J = 15.8$  Hz, 1H), 6.21 (dd,  $J = 15.9, 9.0$  Hz, 1H), 5.14 – 5.12 (m, 1H), 2.05 – 1.98 (m, 3H), 1.68 (s, 3H), 1.67 – 1.64 (m, 1H), 1.59 (s, 3H), 1.57 – 1.53 (m, 1H), 1.244 (s, 6H), 1.240 (s, 6H); <sup>13</sup>C NMR (151 MHz, CDCl<sub>3</sub>)  $\delta$  138.3, 131.8, 131.6, 129.1, 128.4, 126.5, 125.9, 124.5, 83.2, 30.9, 27.6, 25.7, 24.8, 24.6, 17.7;<sup>3</sup> <sup>11</sup>B NMR (193 MHz, CDCl<sub>3</sub>)  $\delta$  32.1; FTIR (NaCl/thin film) 2977, 2927, 1448, 1371, 1321, 1143, 966, 854, 750, 695 cm<sup>-1</sup>; HRMS (LIFDI) [M]<sup>+</sup> calculated for C<sub>21</sub>H<sub>31</sub>BO<sub>2</sub>: 326.2417, found: 326.2429.

Boronate (*S*)-**2o** was oxidized to alcohol (*S*)-**3o** via General Procedure C. The enantiomeric excess was determined to be 76% (run 1: 76% ee; run 2: 76% ee) by chiral HPLC analysis (CHIRALPAK IC, 1.0 mL/min, 3% *i*-PrOH/hexanes,  $\lambda=254$  nm);  $t_R(\text{major}) = 10.883$  min,  $t_R(\text{minor}) = 13.071$  min. The spectral data of this alcohol matched that of alcohol **3o** as prepared via General Procedure F (see below).

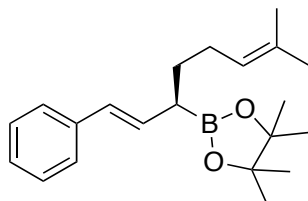

**(*R,E*)-4,4,5,5-Tetramethyl-2-(7-methyl-1-phenylocta-1,6-dien-3-yl)-1,3,2-dioxaborolane ((*R*)-**2o**).** Prepared via General Procedure B using pivalate **1o** (prepared in 78% ee). The crude mixture was purified by silica gel chromatography (0–2% Et<sub>2</sub>O/hexanes) to give (*R*)-**2o** (run 1: 109.3 mg,  $\alpha:\gamma=10:1$ , 84%; run 2: 102.4 mg,  $\alpha:\gamma=10:1$ , 78%) as colorless oil.  $[\alpha]_D^{24} = -17.0$  (c 1.0, CHCl<sub>3</sub>). The spectral data of this compound matches that described above.

Boronate (*R*)-**2o** was oxidized to alcohol (*R*)-**3o** via General Procedure C. The enantiomeric excess was determined to be 70% (run 1: 71% ee; run 2: 69% ee) by chiral HPLC analysis (CHIRALPAK IC, 1.0 mL/min, 3% *i*-PrOH/hexanes,  $\lambda=254$  nm);  $t_R(\text{major}) = 13.055$  min,  $t_R(\text{minor}) = 10.880$  min. The spectral data of this alcohol matches that of alcohol **3o** as prepared via General Procedure F (see below).

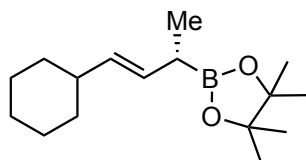

**(*S,E*)-2-(4-cyclohexylbut-3-en-2-yl)-4,4,5,5-tetramethyl-1,3,2-dioxaborolane ((*S*)-2p).**

Prepared via General Procedure A using pivalate **1p** (prepared in 99% ee) except using 5 mol % Ni(cod)<sub>2</sub> and 5.5 mol % *t*-BuXantPhos at 40 °C for 24 h. The crude mixture was purified by silica gel chromatography (0–2% Et<sub>2</sub>O/hexanes) to give (*S*)-**2p** (run 1: 96 mg, 91%; run 2: 94 mg, 89%) as a colorless oil. The α:γ ratio was determined after oxidation to alcohol (*S*)-**3p** (see below). [ $\alpha$ ]<sub>D</sub><sup>24</sup> = –4.5 (c 2.2, CHCl<sub>3</sub>): <sup>1</sup>H NMR (600 MHz, C(O)(CD<sub>3</sub>)<sub>2</sub>) δ 5.43 (ddd, *J* = 15.7, 7.4, 1.2 Hz, 1H), 5.28 (ddd, *J* = 15.6, 6.9, 1.4 Hz, 1H), 1.89 (dt, *J* = 11.2, 3.9 Hz, 1H), 1.72 – 1.65 (m, 4H), 1.62 – 1.60 (m, 1H), 1.31 – 1.22 (m, 3H), 1.20 (s, 12H), 1.15 – 1.01 (m, 3H), 1.00 (d, *J* = 7.3 Hz, 3H); <sup>13</sup>C NMR (151 MHz, C(O)(CD<sub>3</sub>)<sub>2</sub>) δ 134.8, 131.1, 83.8, 41.9, 34.4, 27.1, 26.9, 25.2, 25.1, 15.8;<sup>3</sup> <sup>11</sup>B NMR (193 MHz, C(O)(CD<sub>3</sub>)<sub>2</sub>) δ 33.4; FTIR (NaCl/thin film) 2977, 924, 2851, 1378, 1353, 1144, 965 cm<sup>–1</sup>; HRMS (CI+) [M]+H calculated for C<sub>16</sub>H<sub>30</sub>BO<sub>2</sub>: 265.2339, found: 265.2344.

Boronate (*S*)-**2p** was oxidized to alcohol (*S*)-**3p** via General Procedure C to determine the α:γ ratio (run 1: α:γ=14:1; run 2: α:γ=12:1).

The enantiomeric excess of (*S*)-**2p** was determined by conversion first to alcohol (*S*)-**3p** and then to ester (*S*)-**8p**, as described below. The use of *p*-nitrobenzoate (*S*)-**8p** has been previously described to determine the ee of alcohol **3p**.<sup>4</sup>

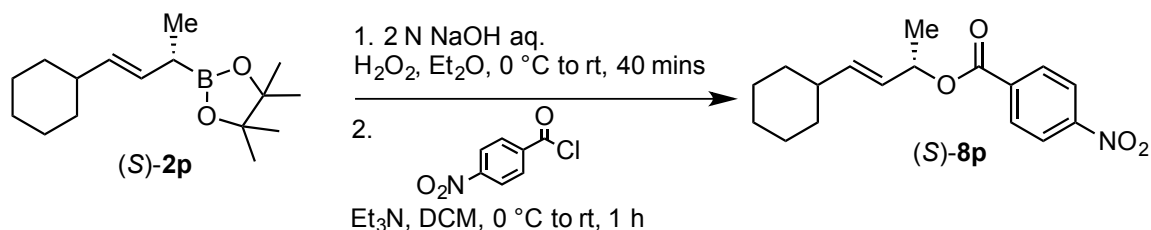

Boronate (*S*)-**2p** (33.4 mg, 0.126 mmol, 1.0 equiv) was oxidized to alcohol (*S*)-**3p** via General Procedure C in quantitative yield. The obtained alcohol (*S*)-**3p** was dissolved in CH<sub>2</sub>Cl<sub>2</sub> (1 mL) and treated with Et<sub>3</sub>N (35 μL, 0.252 mmol, 2.0 equiv) and 4-

<sup>4</sup> Ye, J.; Zhao, J.; Xu, J.; Mao, Y.; Zhang, Y. *J. Chem. Commun.* **2013**, 49, 9761.



nitrobenzoyl chloride (28 mg, 0.15 mmol, 1.2 equiv) at 0 °C. The solution was allowed to stir at rt for an additional 1h. The reaction was quenched with H<sub>2</sub>O (2 mL), and the product was extracted with CH<sub>2</sub>Cl<sub>2</sub> (2 x 1 mL). The organic layers were washed with sat. NaCl, dried (MgSO<sub>4</sub>), filtered, and concentrated. The crude mixture was purified via silica gel chromatography (3–5% Et<sub>2</sub>O/hexanes) to afford ester (*S*)-**8p** as a sticky yellow oil (33.2 mg, 87%). The enantiomeric excess of (*S*)-**8p** was determined to be 91% (run 1: 92% ee; run 2: 90% ee) by chiral HPLC analysis (CHIRALPAK IC, 1 mL/min, 1% *i*-PrOH/hexanes, λ=254 nm); t<sub>R</sub>(major) = 14.953 min, t<sub>R</sub>(minor) = 17.280 min. <sup>1</sup>H NMR (600 MHz, CDCl<sub>3</sub>) δ 8.24 – 8.17 (m, 2H), 8.16 – 8.10 (m, 2H), 5.72 – 5.65 (m, 1H), 5.54 – 5.49 (m, 1H), 5.47 – 5.43 (m, 1H), 1.95 – 1.85 (m, 1H), 1.70 – 1.60 (m, 4H), 1.60 – 1.55 (m, 1H), 1.37 (d, *J* = 6.4 Hz, 3H), 1.25 – 1.13 (m, 2H), 1.13 – 0.90 (m, 3H); <sup>13</sup>C NMR (151 MHz, CDCl<sub>3</sub>) δ 163.9, 150.4, 140.0, 136.3, 130.7, 126.3, 123.4, 73.4, 40.2, 32.60, 32.56, 26.1, 26.0, 25.9, 20.5.

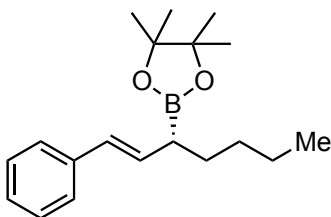

**(*R,E*)-4,4,5,5-tetramethyl-2-(1-phenylhept-1-en-3-yl)-1,3,2-dioxaborolane ((*R*)-**2r**).**

Prepared via General Procedure B using pivalate **1r** (prepared in 94% ee). The crude mixture was purified by silica gel chromatography (0–2% Et<sub>2</sub>O/hexanes) to give (*R*)-**2r** (102.2 mg, α:γ=9:1, 85%) as a colorless oil. [α]<sub>D</sub><sup>24</sup> = +6.9 (c 2.6, CHCl<sub>3</sub>): <sup>1</sup>H NMR (600 MHz, CDCl<sub>3</sub>) δ 7.34 (d, *J* = 7.3 Hz, 2H), 7.28 (d, *J* = 7.5 Hz, 2H), 7.16 (t, *J* = 7.3 Hz, 1H), 6.35 (d, *J* = 15.8 Hz, 1H), 6.21 (dd, *J* = 15.8, 9.1 Hz, 1H), 1.97 (q, *J* = 8.0 Hz, 1H), 1.64 (ddt, *J* = 13.1, 9.6, 6.4 Hz, 1H), 1.51 (td, *J* = 8.1, 3.4 Hz, 1H), 1.39 – 1.25 (m, 4H), 1.243 (s, 6H), 1.239 (s, 6H), 0.88 (t, *J* = 6.9 Hz, 3H); <sup>13</sup>C NMR (151 MHz, CDCl<sub>3</sub>) δ 138.4, 132.3, 129.1, 128.5, 126.6, 126.0, 83.4, 31.6, 30.7, 24.9, 24.8, 22.9, 14.2;<sup>3</sup> <sup>11</sup>B NMR (193 MHz, CDCl<sub>3</sub>) δ 33.0; FTIR (NaCl/thin film) 2929, 1652, 1558, 1456, 1373, 1143, 967, 852 cm<sup>-1</sup>; HRMS (CI<sup>+</sup>) [M]<sup>+</sup>+H calculated for C<sub>19</sub>H<sub>29</sub>BO<sub>2</sub>: 301.2339, found: 301.2336.

Boronate (*R*)-**2r** was oxidized to alcohol (*R*)-**3r** via General Procedure C. The enantiomeric excess was determined to be 70% by chiral HPLC analysis (CHIRALPAK IB, 1 mL/min, 3% *i*-PrOH/hexanes,  $\lambda=254$  nm);  $t_{\text{R}}(\text{major}) = 12.018$  min,  $t_{\text{R}}(\text{minor}) = 19.733$  min. The spectral data of this alcohol matched that of alcohol **3r** reported in the literature.<sup>5</sup>

## Use of Other Diboron Reagents

### Bis(neopentyl glycolato)diboron

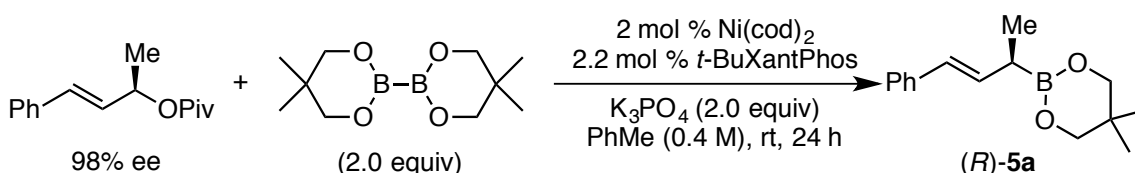

*Retention Conditions:* (*R*)-**5a** was prepared on 0.2-mmol scale following General Procedure A, except using bis(neopentyl glycolato)diboron (90.4 mg, 0.4 mmol, 2.0 equiv). Because (*R*)-**5a** was unstable to silica gel chromatography, the yield (77%,  $\alpha:\gamma=18:1$ ) was determined via <sup>1</sup>H NMR analysis of the crude reaction mixture with 1,3,5-trimethoxybenzene (16.8 mg, 0.1 mmol, 0.5 equiv) as internal standard. The enantiomeric excess (ee) was determined to be 93% after oxidation following General Procedure C.

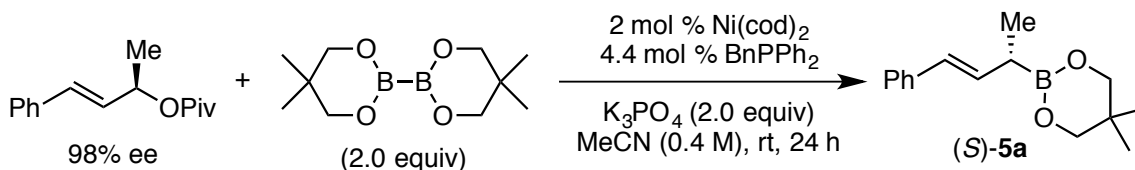

*Inversion Conditions:* (*S*)-**5a** was prepared on 0.2-mmol scale following General Procedure B except using bis(neopentyl glycolato)diboron (90.4 mg, 0.4 mmol, 2.0 equiv). Because (*S*)-**5a** was unstable to silica gel chromatography, the yield (95%,  $\alpha:\gamma=5:1$ ) was determined via <sup>1</sup>H NMR analysis of the crude reaction mixture with 1,3,5-trimethoxybenzene (16.8 mg, 0.1 mmol, 0.5 equiv) as internal standard. The enantiomeric excess (ee) was determined to be 81% after oxidation following General Procedure C.

<sup>5</sup> Stevens, B.D.; Bungard, C.J.; Nelson, S. *J. Org. Chem.* **2006**, *71*, 6397.

## Bis(hexylene glycolato)diboron

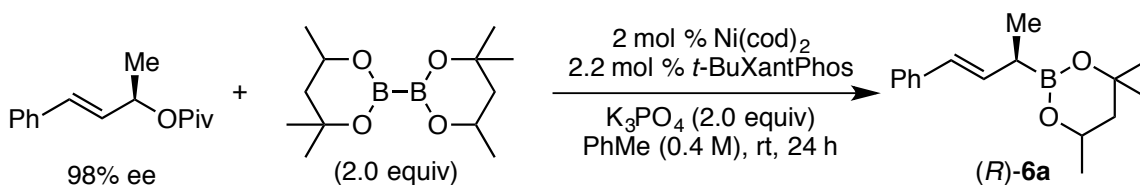

*Retention Conditions:* **(R)-6a** was prepared on 0.2-mmol scale following General Procedure A except using bis(hexylene glycolato)diboron (101.6 mg, 0.4 mmol, 2.0 equiv). Because **(R)-6a** was unstable to silica gel chromatography, the yield (81%,  $\alpha:\gamma=11:1$ ) was determined via <sup>1</sup>H NMR analysis of the crude reaction mixture with 1,3,5-trimethoxybenzene (16.8 mg, 0.1 mmol, 0.5 equiv) as internal standard. The enantiomeric excess (ee) was determined to be 90% after oxidation following General Procedure C.

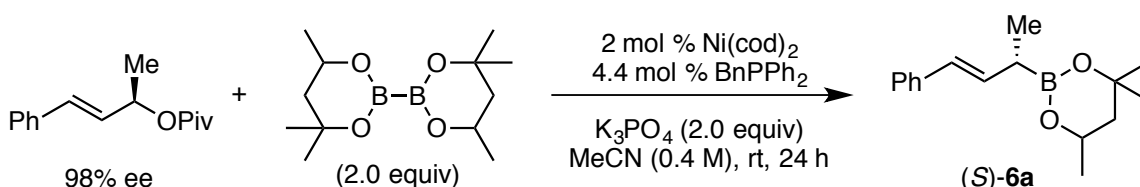

*Inversion Conditions:* **(S)-6a** was prepared on 0.2-mmol scale following General Procedure B except using bis(hexylene glycolato)diboron (101.6 mg, 0.4 mmol, 2.0 equiv). Because **(S)-6a** was unstable to silica gel chromatography, the yield (20%,  $\alpha:\gamma<10:1$ ) was determined via <sup>1</sup>H NMR analysis of the crude reaction mixture with 1,3,5-trimethoxybenzene (16.8 mg, 0.1 mmol, 0.5 equiv) as internal standard. The enantiomeric excess (ee) was determined to be 85% after oxidation following General Procedure C.

## Preparation of Potassium Trifluoroborate Salt 4q

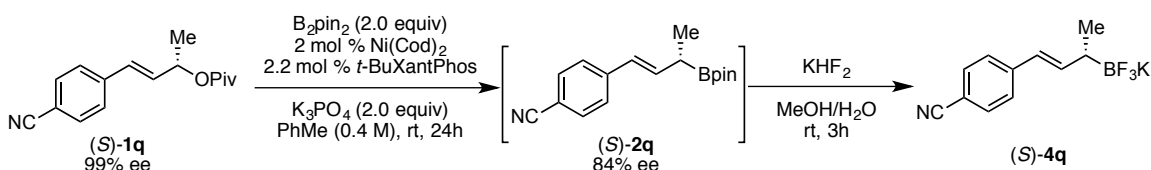

**(S,E)-4,4,5,5-Tetramethyl-2-(4-(4-cyanophenyl)-but-3-en-2-yl)-1,3,2-dioxaborolane ((S)-4q).** *Retention Conditions:* **(S)-4q** was prepared using General

Procedure A using pivalate (*S*)-**1q** (108.5 mg, 0.4 mmol, prepared in 99% ee). Since (*S*)-**2q** was not stable on silica gel, the crude mixture was directly used in next step.

To a solution of crude boronate (*S*)-**2q** in methanol (3 mL) was added aq. KHF<sub>2</sub> (0.27 M, 3 mL, 0.8 mmol). The resulting mixture was stirred for 3 h at room temperature. The reaction mixture was concentrated, washed with Et<sub>2</sub>O/hexane (v/v = 1:10, 10 mL). Then the solid residue was extracted with acetone (10 mL) and filtered. The filtrate was concentrated to afford potassium trifluoroborate salt (*S*)-**4q** (run 1: 88.5 mg, α:γ>20:1, 84%, run 2: 87.0 mg, α:γ>20:1, 83%) as a white solid (m.p 131–133 °C). [α]<sub>D</sub><sup>24</sup> = +11.6 (c 1.7, MeOH); <sup>1</sup>H NMR (600 MHz, CD<sub>3</sub>CN) δ 7.58 (d, *J* = 8.5 Hz, 2H), 7.46 (d, *J* = 8.4 Hz, 2H), 6.84 (dd, *J* = 16.0, 7.2 Hz, 1H), 6.16 (dd, *J* = 16.0, 1.6 Hz, 1H), 1.43 – 1.41 (m, 1H), 1.00 (d, *J* = 6.9 Hz, 3H); <sup>13</sup>C NMR (151 MHz, CD<sub>3</sub>CN) δ 148.8, 145.8, 133.2, 126.4, 121.7, 120.3, 108.5, 14.7;<sup>3</sup> <sup>19</sup>F NMR (565 MHz, CD<sub>3</sub>CN) δ –145.5; <sup>11</sup>B NMR (193 MHz, CD<sub>3</sub>CN) δ 3.98 (q, *J* = 60.1 Hz); FTIR (NaCl/thin film) 2976, 1854, 1599, 1181, 695.

Trifluoroborate salt (*S*)-**4q** was oxidized to alcohol (*S*)-**3q** via a literature procedure.<sup>6</sup> The enantiomeric excess was determined to be 81% (run 1: 81% ee; run 2: 81% ee) by chiral HPLC analysis (CHIRALPAK IA, 1.0 mL/min, 6% *i*-PrOH/hexanes, λ=254 nm); t<sub>R</sub>(major) = 20.539 min, t<sub>R</sub>(minor) = 18.421 min. The spectral data of this alcohol matched that of alcohol **3q** reported in the literature.<sup>4</sup>

In a separate experiment, crude boronate (*S*)-**2q** was oxidized to alcohol (*S*)-**3q** via General Procedure C. The enantiomeric excess was determined to be 84% by chiral HPLC analysis (CHIRALPAK IA, 1.0 mL/min, 6% *i*-PrOH/hexanes, λ=254 nm); t<sub>R</sub>(major) = 20.638 min, t<sub>R</sub>(minor) = 18.477 min.

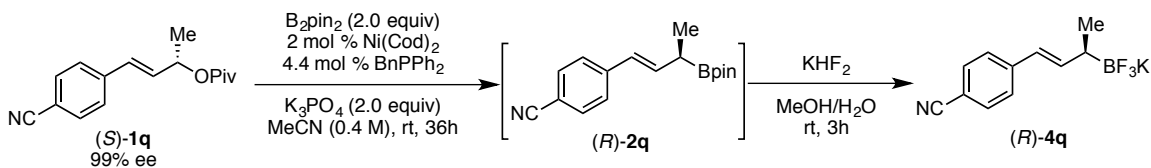

<sup>6</sup> Molander, G. A.; Cavalcanti, L. N. *J. Org. Chem.* **2011**, *76*, 623.

**(*R,E*)-4,4,5,5-Tetramethyl-2-4-(4-cyanophenyl)-but-3-en-2-yl)-1,3,2-dioxaborolane ((*R*)-4q).** *Inversion Conditions:* (*R*)-4q was prepared via General Procedure B using pivalate (*S*)-1q (108.5 mg, 0.4 mmol, prepared in 99% ee). The crude mixture was used directly in the next step. To a solution of crude boronate (*R*)-2q in methanol (3 mL) was added aq. KHF<sub>2</sub> (0.27 M, 3 mL, 0.8 mmol). The resulting mixture was stirred for 3 h at room temperature. The reaction mixture was concentrated, washed with Et<sub>2</sub>O/hexane (v/v = 1:10, 10 mL). Then the solid residue was extracted with acetone (10 mL), and the filtered extract was concentrated to afford trifluoroborate salt (*R*)-4q (run 1: 86.0 mg,  $\alpha:\gamma > 20:1$ , 83%, run 2: 88.1 mg,  $\alpha:\gamma > 20:1$ , 83%) as a white solid (mp 130–133 °C).  $[\alpha]_D^{24} = -8.2$  (0.97, MeOH). The spectral data of this compound matched that described above.

Trifluoroborate salt (*R*)-4q was oxidized to alcohol (*R*)-3q via a literature procedure.<sup>6</sup> The enantiomeric excess was determined to be 78% (run 1: 77% ee; run 2: 79% ee) by chiral HPLC analysis (CHIRALPAK IA, 1.0 mL/min, 6% *i*-PrOH/hexanes,  $\lambda = 254$  nm);  $t_R(\text{major}) = 18.626$  min,  $t_R(\text{minor}) = 20.767$  min. The spectral data of this alcohol matched that of alcohol 3q prepared above.

### Preparation of Potassium Trifluoroborate Salt (*R*)-7

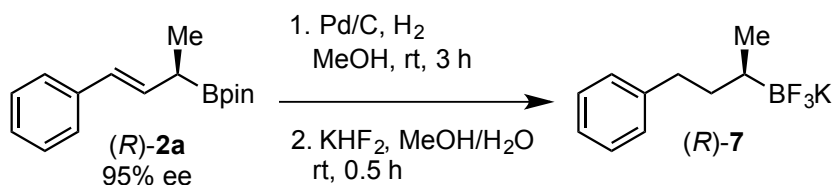

In an oven-dried, round-bottomed flask, (*R*)-2a (163 mg, 0.63 mmol, 1.0 equiv), Pd/C (10% w, 34 mg, 0.0315 mmol, 0.05 equiv), and MeOH (3.1 mL, 0.2 M) were combined at room temperature. The flask was evacuated and refilled with H<sub>2</sub> three times. Under a H<sub>2</sub> balloon, the reaction mixture was stirred at room temperature for 3 h, after which analysis by <sup>1</sup>H NMR of the crude material showed full conversion. The solids were removed via filtration through a plug of Celite<sup>®</sup>. The filtrate was concentrated to give pale yellow oil (154.3 mg, 94%), which was dissolved in MeOH (0.4 mL) and slowly added to a solution of KHF<sub>2</sub> (166.3 mg, 2.13 mmol) in degassed H<sub>2</sub>O (0.8 mL) at room



## Mechanistic Experiments

### Solvent Effect

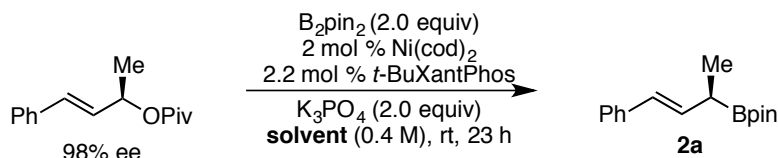

The borylation of pivalate **1a** was performed using General Procedure A, except on a 0.2-mmol scale and using the solvents indicated in Table S3. The reaction mixture was diluted with Et<sub>2</sub>O and filtered through a plug of silica gel, which was then rinsed with additional Et<sub>2</sub>O. After concentration of the filtrate, 1,3,5-trimethoxybenzene was added as an internal standard. The yield and  $\alpha:\gamma$  ratio was determined by <sup>1</sup>H NMR analysis of the crude reaction mixture. Boronate **2a** was then oxidized to alcohol **3a** via General Procedure C, and the ee of alcohol **3a** was determined via HPLC analysis using a chiral stationary phase.

**Table S3.** Effect of solvent on stereospecificity.<sup>a</sup>

| entry | Solvents                        | $E_T^{Nb}$ | $\epsilon_r^c$ | $(\epsilon_r-1)/(2\epsilon_r+1)^d$ | yield(%) <sup>e</sup> | $\alpha:\gamma^f$ | ee(%) <sup>g</sup> | er <sup>h</sup> | log(er) |
|-------|---------------------------------|------------|----------------|------------------------------------|-----------------------|-------------------|--------------------|-----------------|---------|
| 1     | Hexanes                         | 0.009      | 1.88           | 0.1848                             | 92                    | >20:1             | 97                 | 65.67           | 1.82    |
| 2     | Benzene                         | 0.111      | 2.27           | 0.2292                             | 99                    | >20:1             | 95                 | 21.22           | 1.33    |
| 3     | PhMe                            | 0.099      | 2.38           | 0.2396                             | 96                    | >20:1             | 91                 | 39.00           | 1.59    |
| 4     | EtOAc                           | 0.228      | 6.02           | 0.385                              | 94                    | >20:1             | 92                 | 15.67           | 1.19    |
| 5     | THF                             | 0.207      | 7.58           | 0.472                              | 94                    | >20:1             | 88                 | 24.00           | 1.38    |
| 6     | CH <sub>2</sub> Cl <sub>2</sub> | 0.309      | 8.93           | 0.4205                             | 24                    | >20:1             | 39                 | 2.28            | 0.36    |
| 7     | DMF                             | 0.386      | 36.71          | 0.4798                             | 60                    | >20:1             | 26                 | 1.70            | 0.23    |
| 8     | MeCN                            | 0.46       | 35.94          | 0.4794                             | 72                    | >20:1             | -85                | 0.08            | -0.19   |

<sup>a</sup> Conditions: pivalate **1a** (0.2 mmol, 1 equiv), Ni(cod)<sub>2</sub> (2 mol%), *t*-BuXantPhos (2.2 mol %), K<sub>3</sub>PO<sub>4</sub> (2 equiv), solvent (1 mL, 0.4 M), rt, 24 h. <sup>b</sup> Empirical polarity parameter. <sup>c</sup> Relative permittivity value. <sup>d</sup> Kirkwood function. <sup>e</sup> Determined by <sup>1</sup>H NMR analysis using 1,3,5-trimethoxybenzene as internal standard. <sup>f</sup> Determined by <sup>1</sup>H NMR analysis of crude mixture. <sup>g</sup> Determined by HPLC analysis using a chiral stationary phase of the subsequent alcohol (**3a**), formed via General Procedure C. A negative number indicates that the opposite major enantiomer is formed (stereoinversion). <sup>h</sup> er = ratio of enantiomers (*R/S*).

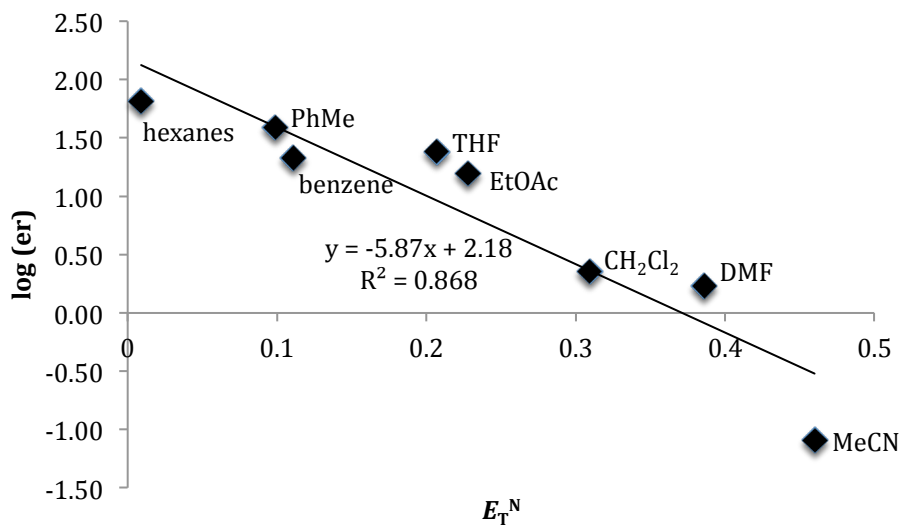

**Figure S1.** Plot of  $\log(\epsilon_r)$  vs.  $E_T^N$ .

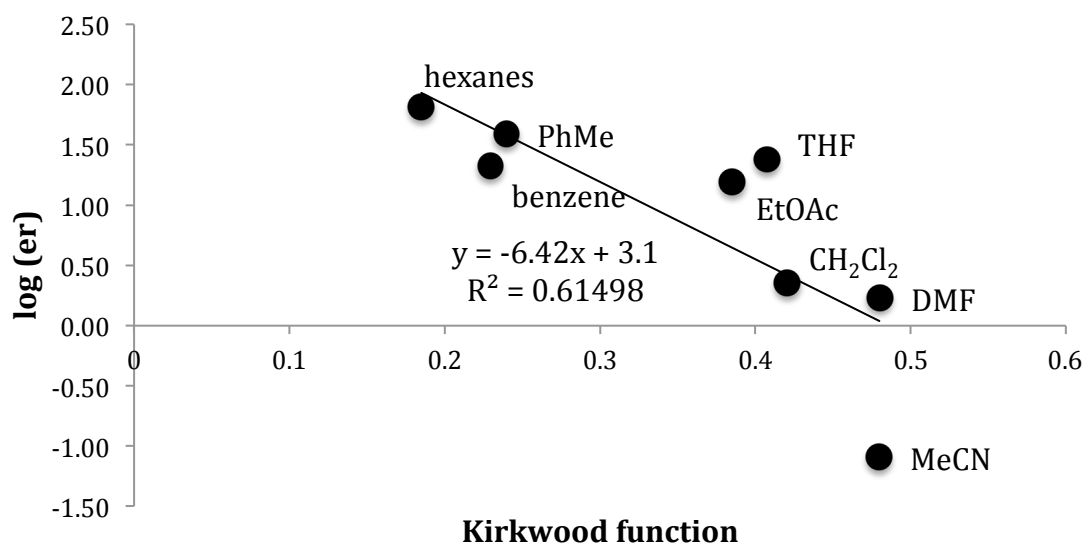

**Figure S2.** Plot of  $\log(\epsilon_r)$  vs. the Kirkwood function.

$$\text{Kirkwood function} = \frac{(\epsilon_r - 1)}{(2\epsilon_r + 1)}$$



## Leaving Group Effect: Hammett Correlation

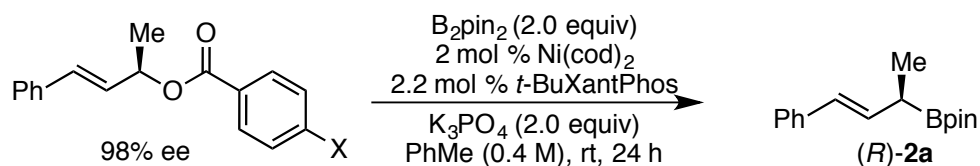

The borylation of the benzoates was performed using General Procedure A, except on a 0.2-mmol scale and using the benzoates indicated in Table S4. The reaction mixture was diluted with  $\text{Et}_2\text{O}$  and filtered through a plug of silica gel, which was then rinsed with additional  $\text{Et}_2\text{O}$ . After concentration of the filtrate, 1,3,5-trimethoxybenzene was added as an internal standard. The yield and  $\alpha:\gamma$  ratio was determined by  $^1\text{H}$  NMR analysis of the crude reaction mixture. Boronate **2a** was then oxidized to alcohol **3a** via General Procedure C, and the ee of alcohol **3a** was determined via HPLC analysis using a chiral stationary phase.

**Table S4.** Hammett correlation between carboxylate and enantiomeric ratio.<sup>a</sup>

| entry | X                | $\sigma$ | yield(%) <sup>b</sup> | $\alpha:\gamma$ <sup>c</sup> | ee(%) <sup>d</sup> | er <sup>e</sup> | log(er) |
|-------|------------------|----------|-----------------------|------------------------------|--------------------|-----------------|---------|
| 1     | OMe              | -0.268   | 76                    | >20:1                        | 82.7               | 10.55           | 1.023   |
| 2     | H                | 0        | 85                    | >20:1                        | 81.2               | 9.68            | 0.986   |
| 3     | F                | 0.062    | 50                    | >20:1                        | 85.2               | 12.54           | 1.098   |
| 4     | OCF <sub>3</sub> | 0.35     | 86                    | >20:1                        | 38.0               | 2.23            | 0.348   |
| 5     | CF <sub>3</sub>  | 0.54     | 80                    | >20:1                        | 41.2               | 2.4             | 0.38    |

<sup>a</sup> Conditions: Benzoate (0.2 mmol, 1.0 equiv),  $\text{Ni}(\text{cod})_2$  (2 mol %), *t*-BuXantPhos (2.2 mol %),  $\text{K}_3\text{PO}_4$  (2.0 equiv), PhMe (1.0 mL, 0.4 M), rt, 24 h. <sup>b</sup> Determined by  $^1\text{H}$  NMR analysis using 1,3,5-trimethoxybenzene as internal standard. <sup>c</sup> Determined by  $^1\text{H}$  NMR analysis of crude mixture. <sup>d</sup> Determined by HPLC analysis using a chiral stationary phase of the subsequent alcohol (**3a**), formed via General Procedure C. <sup>e</sup> er = ratio of enantiomers (*R/S*).

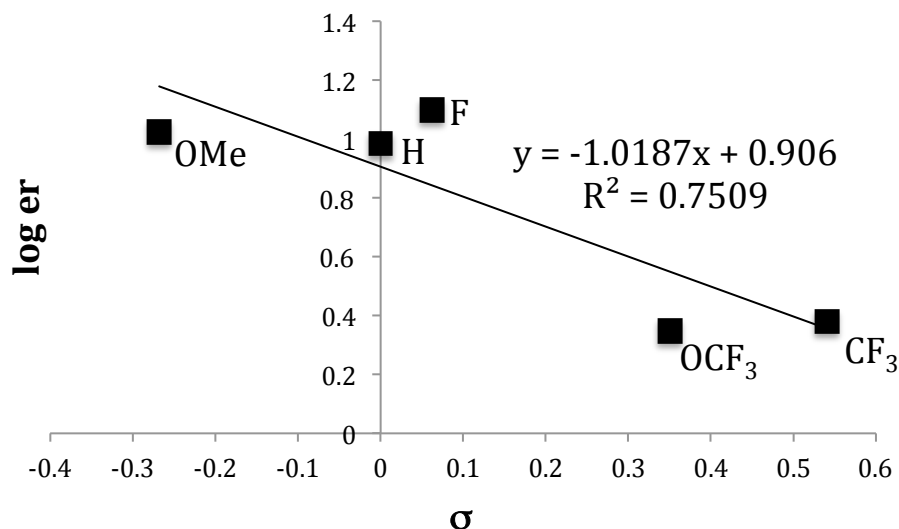

**Figure S3.** Hammett correlation between carboxylate and enantiomeric ratio.

#### Addition of Benzonitriles: Hammett Correlation

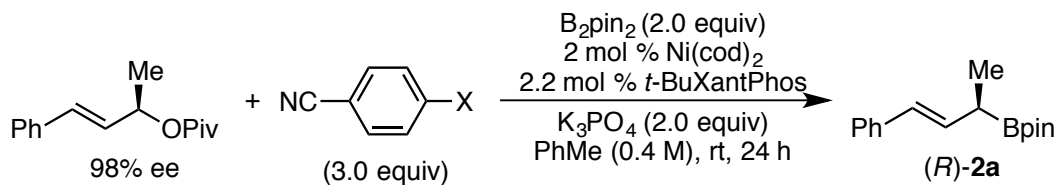

The borylation of pivalate **1a** was performed using General Procedure A, except on a 0.2-mmol scale and with the addition of the benzonitriles (3.0 equiv) listed in Table S5. Solid nitriles were added along with the other solid reagents. Liquid nitriles were added last, after the solvent. The reaction mixture was diluted with Et<sub>2</sub>O and filtered through a plug of silica gel, which was then rinsed with additional Et<sub>2</sub>O. After concentration of the filtrate, 1,3,5-trimethoxybenzene was added as an internal standard. The yield and  $\alpha:\gamma$  ratio was determined by <sup>1</sup>H NMR analysis of the crude reaction mixture. Boronate **2a** was then oxidized to alcohol **3a** via General Procedure C, and the ee of alcohol **3a** was determined via HPLC analysis using a chiral stationary phase.

**Table S5.** Hammett correlation between benzonitriles and enantiomeric ratio.<sup>a</sup>

| entry | X               | $\sigma$ | yield(%) <sup>b</sup> | $\alpha:\gamma$ <sup>c</sup> | ee(%) <sup>d</sup> | er <sup>e</sup> | log(er) |
|-------|-----------------|----------|-----------------------|------------------------------|--------------------|-----------------|---------|
| 1     | H               | 0        | 79                    | 11:1                         | 33.4               | 2               | 0.301   |
| 2     | F               | 0.062    | 84                    | 11:1                         | 37.7               | 2.21            | 0.344   |
| 3     | CH <sub>3</sub> | -0.17    | 65                    | 11:1                         | 15.1               | 1.36            | 0.134   |
| 4     | Cl              | 0.227    | 82                    | 11:1                         | 55.4               | 3.48            | 0.542   |
| 5     | CF <sub>3</sub> | 0.54     | 89                    | 11:1                         | 70.5               | 5.78            | 0.762   |

<sup>a</sup> Conditions: pivalate **1a** (0.2 mmol, 1 equiv), Ni(cod)<sub>2</sub> (2 mol%), *t*-BuXantPhos (2.2 mol %), K<sub>3</sub>PO<sub>4</sub> (2 equiv), nitrile (3 equiv), PhMe (1 mL, 0.4 M), rt, 24 h. <sup>b</sup> Determined by <sup>1</sup>H NMR analysis using 1,3,5-trimethoxybenzene as internal standard. <sup>c</sup> Determined by <sup>1</sup>H NMR analysis of crude mixture. <sup>d</sup> Determined by HPLC analysis using a chiral stationary phase of the subsequent alcohol (**3a**), formed via General Procedure C. A negative number indicates that the opposite major enantiomer is formed (stereoinversion). <sup>e</sup> er = ratio of enantiomers (*R/S*).

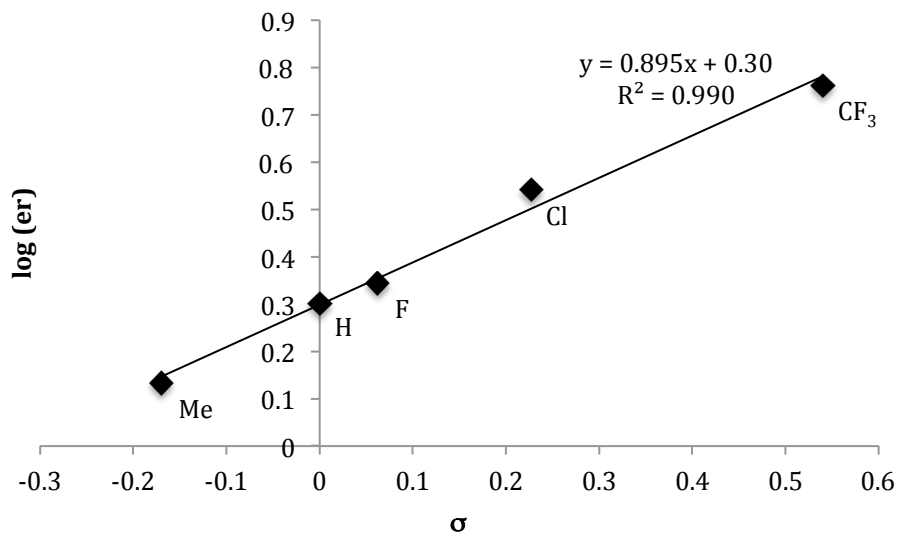**Figure S4.** Hammett correlation between benzonitrile and enantiomeric ratio.

## Preparation of Allylic Pivalates

### General Procedure D: Preparation of (*S,E*)-4-(3-methoxyphenyl)but-3-en-2-yl pivalate ((*S*)-1f)

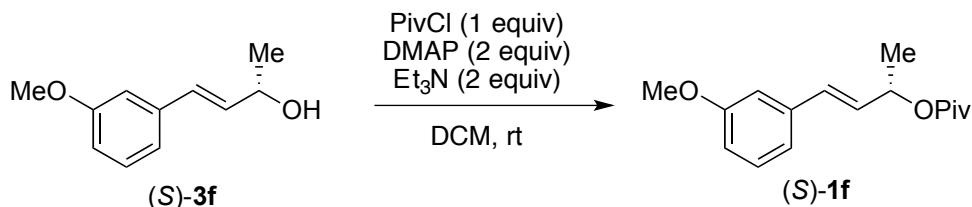

(*S,E*)-4-(3-Methoxyphenyl)but-3-en-2-ol ((*S*)-**3f**, 1.26 g, 7.08 mmol, 1.0 equiv, 99% ee), DMAP (173 mg, 1.42 mmol, 0.20 equiv), and CH<sub>2</sub>Cl<sub>2</sub> (21 mL, 0.3 M) were combined. Et<sub>3</sub>N (1.97 mL, 14.2 mmol, 2.0 equiv) and pivaloyl chloride (0.85 mL, 7.08 mmol, 1.0 equiv) were then added. The reaction mixture was stirred for 14 h at room temperature. H<sub>2</sub>O (30 mL) was added. The mixture was extracted with CH<sub>2</sub>Cl<sub>2</sub> (2 x 30 mL). The combined organic layers were washed with aq. KOH (2.0 M, 30 mL), dried (MgSO<sub>4</sub>), filtered and concentrated. The resulting residue was purified by silica gel chromatography (5–40% EtOAc/hexanes) to give compound (*S*)-**1f** (1.36 g, 75%) as a colorless oil. The enantiomeric excess was determined to be 98% by chiral HPLC analysis (CHIRALPAK IA, 1 mL/min, 1% *i*-PrOH/hexane, λ=254 nm); t<sub>R</sub>(major) = 5.555 min, t<sub>R</sub>(minor) = 7.792 min. [α]<sub>D</sub><sup>24</sup> = +94.4 (c 1.14, CHCl<sub>3</sub>): <sup>1</sup>H NMR (400 MHz, CDCl<sub>3</sub>) δ 7.23 (t, *J* = 7.9 Hz, 1H), 7.01 – 6.95 (m, 1H), 6.93 – 6.29 (m, 1H), 6.83 – 6.77 (m, 1H), 6.60 – 6.52 (m, 1H), 6.18 (dd, *J* = 15.9, 6.4 Hz, 1H), 5.54 – 5.45 (m, 1H), 3.82 (s, 3H), 1.39 (d, *J* = 6.5 Hz, 3H), 1.21 (s, 9H); <sup>13</sup>C NMR (151 MHz, CDCl<sub>3</sub>) δ 177.9, 159.9, 138.0, 131.0, 129.7, 129.6, 119.3, 113.6, 111.9, 70.6, 55.4, 38.9, 27.3, 20.4; FTIR (NaCl/thin film) 2976, 2934, 2872, 2835, 1724, 1599, 1480, 1280, 1157, 1041, 968, 773 cm<sup>-1</sup>; HRMS (EI+) [M]<sup>+</sup> calculated for C<sub>16</sub>H<sub>22</sub>O<sub>3</sub>: 262.1569, found: 262.1570.

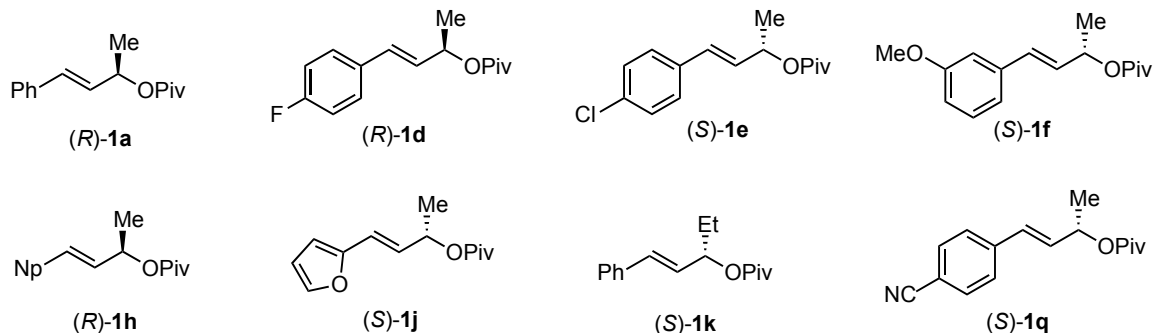

Allylic Pivalates (*R*)-1a, (*R*)-1d, (*S*)-1e, (*S*)-1f, (*R*)-1h, (*S*)-1j, (*S*)-1k and (*S*)-1q were prepared via General Procedure D and the spectral of these compounds match that reported by our group.<sup>10</sup>

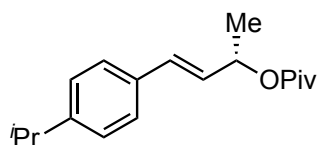

**(*S,E*)-4-(4-isopropylphenyl)but-3-en-2-yl pivalate (1b).** Prepared as a colorless oil via General Procedure D using (*S*)-3b (92% ee). The enantiomeric excess was determined to be 92% by chiral HPLC analysis (CHIRALPAK IA, 1 mL/min, 0.5% *i*-PrOH/hexane,  $\lambda=254$  nm);  $t_R(\text{major}) = 4.722$  min,  $t_R(\text{minor}) = 5.304$  min.  $[\alpha]_D^{24} = +101.5$  (c 1.13,  $\text{CHCl}_3$ );  $^1\text{H NMR}$  (400 MHz,  $\text{CDCl}_3$ )  $\delta$  7.34 – 7.29 (m, 2H), 7.20 – 7.15 (m, 2H), 6.60 – 6.53 (m, 1H), 6.14 (dd,  $J = 15.9, 6.6$  Hz, 1H), 5.53 – 5.49 (m, 1H), 2.96 – 2.82 (m, 1H), 1.38 (d,  $J = 6.5$  Hz, 3H), 1.24 (d,  $J = 6.9$  Hz, 6H), 1.21 (s, 9H);  $^{13}\text{C NMR}$  (101 MHz,  $\text{CDCl}_3$ )  $\delta$  177.9, 148.9, 134.2, 131.2, 128.3, 126.8, 126.7, 70.8, 38.9, 34.0, 27.3, 24.1, 20.5; FTIR (NaCl/thin film) 2961, 2932, 2871, 1726, 1479, 1457, 1280, 1162, 1040, 967  $\text{cm}^{-1}$ ; HRMS (EI+)  $[M]^+$  calculated for:  $\text{C}_{18}\text{H}_{26}\text{O}_2$ : 274.1933, found: 274.1952.

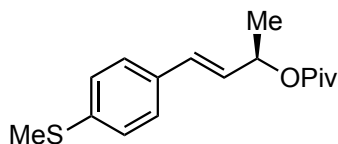

**(*R,E*)-4-(4-(methylthio)phenyl)but-3-en-2-yl pivalate (1c).** Prepared as a colorless oil via General Procedure D using (*R*)-3c (93% ee). The enantiomeric excess was determined

<sup>10</sup> Srinivas, H. D.; Zhou, Q.; Watson, M.P. *Org. Lett.* **2014**, *16*, 3596.

to be 93% by chiral HPLC analysis (CHIRALPAK IA, 0.8 mL/min, 1% *i*-PrOH/hexane,  $\lambda=254$  nm);  $t_R(\text{major}) = 7.922$  min,  $t_R(\text{minor}) = 8.812$  min.  $[\alpha]_D^{24} = +100.9$  (c 2.84,  $\text{CHCl}_3$ ):  $^1\text{H NMR}$  (400 MHz,  $\text{CDCl}_3$ )  $\delta$  7.33 – 7.27 (m, 2H), 7.24 – 7.16 (m, 2H), 6.57 – 6.48 (m, 1H), 6.14 (dd,  $J = 16.0, 6.5$  Hz, 1H), 5.54 – 5.42 (m, 1H), 2.48 (s, 3H), 1.38 (d,  $J = 6.5$  Hz, 3H), 1.21 (s, 9H);  $^{13}\text{C NMR}$  (101 MHz,  $\text{CDCl}_3$ )  $\delta$  177.9, 138.2, 133.5, 130.6, 128.6, 127.1, 126.6, 70.7, 38.9, 27.3, 20.5, 15.9; FTIR (NaCl/thin film) 2976, 2923, 1723, 1700, 1652, 1558, 1162, 976  $\text{cm}^{-1}$ ; HRMS (CI+)  $[\text{M}]+\text{H}$  calculated for  $\text{C}_{16}\text{H}_{23}\text{O}_2\text{S}$ : 279.1419, found: 279.1430.

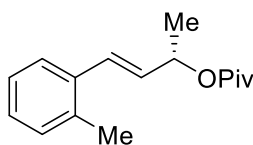

**(*S,E*)-4-(*o*-Tolyl)but-3-en-2-yl pivalate (1g).** Prepared as a colorless oil via General Procedure D using (*S*)-**3g** (94% ee). The enantiomeric excess was determined to be 94% by chiral HPLC analysis (CHIRALPAK IC, 1 mL/min, 1% *i*-PrOH/hexane,  $\lambda=254$  nm);  $t_R(\text{major}) = 4.614$  min,  $t_R(\text{minor}) = 4.300$  min.  $[\alpha]_D^{24} = +41.9$  (c 0.6, MeOH):  $^1\text{H NMR}$  (400 MHz,  $\text{C}(\text{O})(\text{CD}_3)_2$ )  $\delta$  7.52 – 7.42 (m, 1H), 7.21 – 7.13 (m, 3H), 6.86 (dd,  $J = 15.9, 1.3$  Hz, 1H), 6.18 (dd,  $J = 15.9, 6.0$  Hz, 1H), 5.55 – 5.45 (m, 1H), 2.33 (s, 3H), 1.39 (d,  $J = 6.5$  Hz, 3H), 1.21 (s, 9H);  $^{13}\text{C NMR}$  (101 MHz,  $\text{C}(\text{O})(\text{CD}_3)_2$ )  $\delta$  177.5, 136.5, 136.4, 131.6, 131.2, 129.1, 128.6, 127.1, 126.4, 71.2, 39.3, 27.5, 20.8, 19.9; FTIR (NaCl/thin film) 2976, 1727, 1281, 1161, 1040, 966, 749; HRMS (LIFDI)  $[\text{M}]+$  calculated for  $\text{C}_{16}\text{H}_{22}\text{O}_2$ : 246.1620, found: 246.1639.

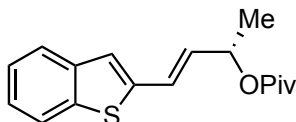

**(*S,E*)-4-(benzothiophen-2-yl)but-3-en-2-yl pivalate (1i).** Prepared as an off-white solid (mp 98–100 °C) via General Procedure D using (*S*)-**3i** (70% ee). The enantiomeric excess was determined to be 70% by chiral HPLC analysis (CHIRALPAK IC, 1 mL/min, 1% *i*-PrOH/hexane,  $\lambda=254$  nm);  $t_R(\text{major}) = 7.816$  min,  $t_R(\text{minor}) = 9.201$  min.  $[\alpha]_D^{24} = +82.1$  (c 1.16,  $\text{CHCl}_3$ ):  $^1\text{H NMR}$  (600 MHz,  $\text{CDCl}_3$ )  $\delta$  7.78 – 7.73 (m, 1H), 7.71 – 7.66 (m, 1H),

7.42 – 7.30 (m, 2H), 7.16 (s, 1H), 6.83 – 6.78 (d,  $J = 15.6$ , 1H), 6.10 (dd,  $J = 15.7$ , 6.2 Hz, 1H), 5.56 – 5.45 (m, 1H), 1.41 (d,  $J = 6.5$  Hz, 3H), 1.23 (s, 9H);  $^{13}\text{C}$  NMR (151 MHz,  $\text{CDCl}_3$ )  $\delta$  177.8, 141.8, 140.1, 139.1, 131.5, 125.0, 124.9, 124.6, 123.64, 123.60, 122.3, 70.1, 39.0, 27.3, 20.3; FTIR (NaCl/thin film) 2973, 2933, 2870, 1723, 1478, 1279, 1152, 1036, 956, 743  $\text{cm}^{-1}$ ; HRMS (EI+)  $[\text{M}]^+$  calculated for  $\text{C}_{17}\text{H}_{20}\text{O}_2\text{S}$ : 288.1184, found: 288.1185.

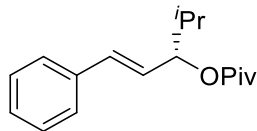

**(*S,E*)-4-Methyl-1-phenylpent-1-en-3-yl pivalate (11).** Prepared as a colorless oil via General Procedure D using (*S*)-**3l** (99% ee). The enantiomeric excess was determined to be 99% by chiral HPLC analysis (CHIRALPAK IB, 1.0 mL/min, 1.0% *i*-PrOH/hexane,  $\lambda=254$  nm);  $t_{\text{R}}(\text{major}) = 4.747$  min,  $t_{\text{R}}(\text{minor}) = 4.149$  min.  $[\alpha]_{\text{D}}^{24} = +69.2$  (c 0.24, MeOH):  $^1\text{H}$  NMR (400 MHz,  $\text{CDCl}_3$ )  $\delta$  7.41 – 7.36 (m, 2H), 7.34 – 7.29 (m, 2H), 7.28 – 7.21 (m, 1H), 6.58 (d,  $J = 15.9$  Hz, 1H), 6.13 (dd,  $J = 15.9$ , 7.2 Hz, 1H), 5.21 (ddd,  $J = 7.3$ , 6.1, 1.2 Hz, 1H), 1.97 (dq,  $J = 13.4$ , 6.7 Hz, 1H), 1.24 (s, 9H), 0.97 (dd,  $J = 8.7$ , 6.8 Hz, 6H);  $^{13}\text{C}$  NMR (151 MHz,  $\text{CDCl}_3$ )  $\delta$  177.6, 136.6, 132.7, 127.7, 126.5, 126.5, 78.7, 39.0, 32.5, 27.2, 27.2, 18.3, 18.0; FTIR (NaCl/thin film) 3027, 2967, 2933, 2873, 1728, 1480, 1280, 1161, 967, 747, 693  $\text{cm}^{-1}$ ; HRMS (CI)  $[\text{M}]^+$  calculated for  $\text{C}_{17}\text{H}_{24}\text{O}_2$ : 260.1776, found: 260.1758.

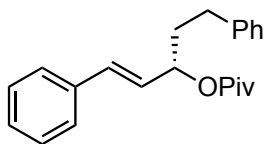

**(*S,E*)-1,5-diphenylpent-1-en-3-yl pivalate (1m).** Prepared as a pale yellow oil via General Procedure D using (*S*)-**3m** (99% ee). The enantiomeric excess was determined to be 99% by chiral HPLC analysis (CHIRALPAK IA, 1 mL/min, 1% *i*-PrOH/hexane,  $\lambda=254$  nm);  $t_{\text{R}}(\text{major}) = 6.342$  min,  $t_{\text{R}}(\text{minor}) = 10.752$  min.  $[\alpha]_{\text{D}}^{24} = +20.6$  (c 0.87,  $\text{CHCl}_3$ ):  $^1\text{H}$  NMR (600 MHz,  $\text{CDCl}_3$ )  $\delta$  7.39 – 7.35 (m, 2H), 7.34 – 7.27 (m, 4H), 7.26 – 7.23 (m, 2H), 7.22 – 7.16 (m, 3H), 6.61 (d,  $J = 15.9$  Hz, 1H), 6.16 (dd,  $J = 15.9$ , 7.0 Hz, 1H), 5.48 – 5.38 (m, 1H), 2.77 – 2.60 (m, 2H), 2.13 – 2.03 (m, 1H), 2.03 – 1.93 (m, 1H),

1.25 (s, 9H);  $^{13}\text{C}$  NMR (151 MHz,  $\text{CDCl}_3$ )  $\delta$  177.8, 141.5, 136.6, 132.4, 128.7, 128.6, 128.5, 128.0, 127.8, 126.7, 126.1, 73.8, 39.1, 36.5, 31.7, 27.4; FTIR (NaCl/thin film) 3026, 2971, 2870, 1732, 1653, 1558, 1280, 1153, 965, 747, 694  $\text{cm}^{-1}$ ; HRMS (EI+)  $[\text{M}]^+$  calculated for  $\text{C}_{22}\text{H}_{26}\text{O}_2$ : 322.1933, found: 322.1935.

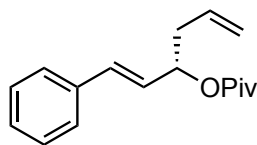

**(*S,E*)-1-phenylhexa-1,5-dien-3-yl pivalate (1n).** Prepared as a colorless oil via General Procedure D using (*S*)-**3n** (99% ee). The enantiomeric excess was determined to be 99% by chiral HPLC analysis (CHIRALPAK IC, 0.8 mL/min, 1% *i*-PrOH/hexane,  $\lambda=254$  nm);  $t_{\text{R}}(\text{major}) = 6.560$  min,  $t_{\text{R}}(\text{minor}) = 7.178$  min.  $[\alpha]_{\text{D}}^{24} = +59.1$  (c 1.13,  $\text{CHCl}_3$ );  $^1\text{H}$  NMR (600 MHz,  $\text{CDCl}_3$ )  $\delta$  7.41 – 7.33 (m, 2H), 7.33 – 7.28 (m, 2H), 7.26 – 7.22 (m, 1H), 6.60 (d,  $J = 15.9$  Hz, 1H), 6.16 (dd,  $J = 16.0, 6.8$  Hz, 1H), 5.83 – 5.77 (m, 1H), 5.52 – 5.45 (m, 1H), 5.14 – 5.06 (m, 2H), 2.53 – 2.47 (m, 2H), 1.22 (s, 9H);  $^{13}\text{C}$  NMR (151 MHz,  $\text{CDCl}_3$ )  $\delta$  177.8, 136.6, 133.4, 132.2, 128.7, 128.0, 127.5, 126.7, 118.2, 73.3, 39.4, 39.0, 27.3; FTIR (NaCl/thin film) 2973, 2932, 2871, 1723, 1478, 1278, 1153, 1035, 956, 743  $\text{cm}^{-1}$ ; HRMS (EI+)  $[\text{M}]^+$  calculated for 258.1620, found: 258.1615.

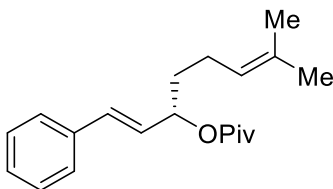

**(*S,E*)-7-methyl-1-phenylocta-1,6-dien-3-yl pivalate (1o).** Prepared as a colorless oil via General Procedure D using (*S*)-**3o** (80% ee). The enantiomeric excess was determined to be 78% by chiral HPLC analysis (CHIRALPAK IB, 1.0 mL/min, 0.5% *i*-PrOH/hexane,  $\lambda=254$  nm);  $t_{\text{R}}(\text{major}) = 6.508$  min,  $t_{\text{R}}(\text{minor}) = 4.705$  min.  $[\alpha]_{\text{D}}^{24} = +47.6$  (c 0.59, MeOH);  $^1\text{H}$  NMR (400 MHz,  $\text{CDCl}_3$ )  $\delta$  7.31–7.29 (m, 2H), 7.25 – 7.23 (m, 2H), 7.19 – 7.15 (m, 1H), 6.51 (d,  $J = 15.9$  Hz, 1H), 6.06 (dd,  $J = 16.0, 7.0$  Hz, 1H), 5.36 – 5.28 (m, 1H), 5.07 – 5.04 (m, 1H), 2.05 – 1.91 (m,  $J = 7.0$  Hz, 2H), 1.77 – 1.66 (m, 1H), 1.66 – 1.58 (m, 4H), 1.52 (s, 3H), 1.15 (s, 9H);  $^{13}\text{C}$  NMR (151 MHz,  $\text{CDCl}_3$ )  $\delta$  177.7, 136.6, 132.3, 131.9, 128.5, 128.0, 127.8, 126.5, 123.4, 73.8, 38.9, 34.7, 27.2, 25.7, 23.8, 17.7;



FTIR (NaCl/thin film) 2970, 1728, 1280, 1153, 965, 748, 693; HRMS (LIFDI) [M]<sup>+</sup> calculated for C<sub>20</sub>H<sub>28</sub>O<sub>2</sub>: 300.2089, found: 300.2089.

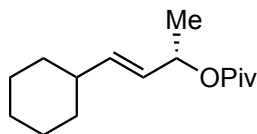

**(*S,E*)-4-cyclohexylbut-3-en-2-yl pivalate (1p).** Prepared as a colorless oil via General Procedure D using (*S*)-**3p** (99% ee). The enantiomeric excess was considered to be 99% based on the ee of precursor alcohol (*S*)-**3p**.  $[\alpha]_D^{24} = +59.1$  (c 1.35, CHCl<sub>3</sub>): <sup>1</sup>H NMR (600 MHz, CDCl<sub>3</sub>)  $\delta$  5.61 (dd, *J* = 15.6, 6.5 Hz, 1H), 5.39 (dd, *J* = 15.6, 6.6 Hz, 1H), 5.34 – 5.23 (m, 1H), 1.97 – 1.88 (m, 1H), 1.75 – 1.60 (m, 5H), 1.30 – 1.24 (m, 5H), 1.18 (s, 9H), 1.17 – 1.10 (m, 1H), 1.10 – 1.00 (m, 2H); <sup>13</sup>C NMR (151 MHz, CDCl<sub>3</sub>)  $\delta$  177.9, 138.5, 127.3, 70.8, 40.3, 32.9, 32.8, 27.3, 26.3, 26.1, 20.5; FTIR (NaCl/thin film) 2976, 2926, 2852, 1728, 1449, 1281, 1162, 1043, 967 cm<sup>-1</sup>; HRMS (CI<sup>+</sup>) [M]<sup>+</sup>+H calculated for C<sub>15</sub>H<sub>27</sub>O<sub>2</sub>: 239.2011, found: 239.2022.

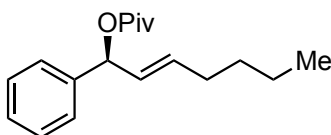

**(*S,E*)-1-phenylhept-2-en-1-yl pivalate (1r).** Prepared as a colorless oil via General Procedure D using (*S*)-**3r** (94% ee). The enantiomeric excess was considered to be 94% based on the ee of precursor alcohol (*S*)-**3r**.  $[\alpha]_D^{24} = +8.0$  (c 1.12, CHCl<sub>3</sub>): <sup>1</sup>H NMR (600 MHz, CDCl<sub>3</sub>)  $\delta$  7.36 – 7.31 (m, 4H), 7.29 – 7.29 (m, 1H), 6.20 (d, *J* = 6.8 Hz, 1H), 5.73 (dd, *J* = 14.9, 6.8 Hz, 1H), 5.60 (dd, *J* = 15.4, 6.9 Hz, 1H), 2.10 – 2.00 (m, 2H), 1.39 – 1.26 (m, 4H), 1.22 (s, 9H), 0.88 (t, *J* = 7.2 Hz, 3H); <sup>13</sup>C NMR (151 MHz, CDCl<sub>3</sub>)  $\delta$  177.5, 140.4, 134.6, 128.6, 128.5, 127.8, 126.7, 76.0, 39.0, 32.0, 31.2, 27.3, 22.3, 14.0; FTIR (NaCl/thin film) 2958, 2930, 2872, 1732, 1479, 1278, 1150, 967, 698 cm<sup>-1</sup>; HRMS (EI<sup>+</sup>) [M]<sup>+</sup> calculated for C<sub>18</sub>H<sub>26</sub>O<sub>2</sub>: 274.1933, found: 274.1938.

## Preparation of Allylic Alcohols

### General Procedure E: Preparation of (*R,E*)-4-(4-(methylthio)phenyl)but-3-en-2-ol ((*R*)-**3c**) via CBS Reduction

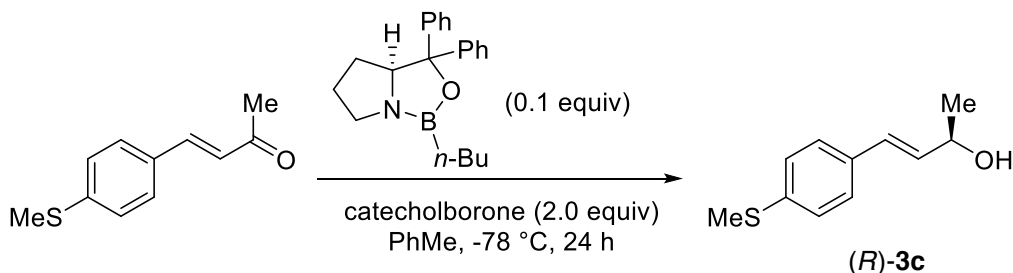

This procedure was adapted from that in the literature.<sup>2</sup> In an oven-dried round-bottomed flask, (*E*)-4-(4-isopropylphenyl)but-3-en-2-ol (1.08 g, 5.84 mmol, 1.0 equiv) was dissolved in 12 mL PhMe. Under a N<sub>2</sub> atmosphere, (*S*)-(-)-2-butyl-CBS-oxazaborolidine (0.58 mL, 0.58 mmol, 1.0 M in PhMe, 0.1 equiv) was added. After stirring at room temperature for 15 min, the mixture was cooled to -78 °C, and catecholborane (1.24 mL, 11.68 mmol, 2.0 equiv) was added slowly. The mixture was stirred at -78 °C for additional 24 h. The reaction was quenched with sat. NaHCO<sub>3</sub> (10 mL). The crude product was extracted with EtOAc (3 x 20 mL). The combined organic layers were washed with aq. NaOH (1.5 M) until the color of the solution was light yellow, indicating the full removal of residual catecholborane. The organic layers were then treated with sat. NaCl, dried (MgSO<sub>4</sub>), filtered, and concentrated. The resulting residue was purified by silica gel chromatography (50% Et<sub>2</sub>O/hexanes) to give compound (*R*)-**3c** (920mg, 92%) as pale yellow solid (mp 97–99 °C). The enantiomeric excess was determined to be 92% by chiral HPLC analysis (CHIRALPAK IC, 1 mL/min, 6% *i*-PrOH/hexanes, λ=254 nm); t<sub>R</sub>(major) = 13.164 min, t<sub>R</sub>(minor) = 15.211 min. [α]<sub>24</sub><sup>D</sup> = +39.7 (c 2.46, CHCl<sub>3</sub>): <sup>1</sup>H NMR (600 MHz, CDCl<sub>3</sub>) δ 7.30 (d, *J* = 8.3 Hz, 2H), 7.20 (d, *J* = 8.3 Hz, 2H), 6.52 (d, *J* = 15.9 Hz, 1H), 6.22 (dd, *J* = 15.9, 6.4 Hz, 1H), 4.52 – 4.43 (pd, *J* = 6.4, 1.2 Hz, 1H), 2.48 (s, 3H), 1.59 (s, 1H), 1.37 (d, *J* = 6.3 Hz, 3H); <sup>13</sup>C NMR (151 MHz, CDCl<sub>3</sub>) δ 138.0, 133.8, 133.1, 129.0, 127.0, 126.8, 69.1, 23.6, 16.0; FTIR (NaCl/thin film) 3317(brs), 2977, 2884, 1653, 1418, 1124, 970, 803 cm<sup>-1</sup>; HRMS (CI+) [M]<sup>+</sup>+H calculated for: C<sub>11</sub>H<sub>15</sub>OS: 195.0844, found: 195.0837.

## General Procedure F: Preparation of (*S,E*)-4-(4-isopropylphenyl)but-3-en-2-ol ((*S*)-**3b**) via Kinetic Resolution

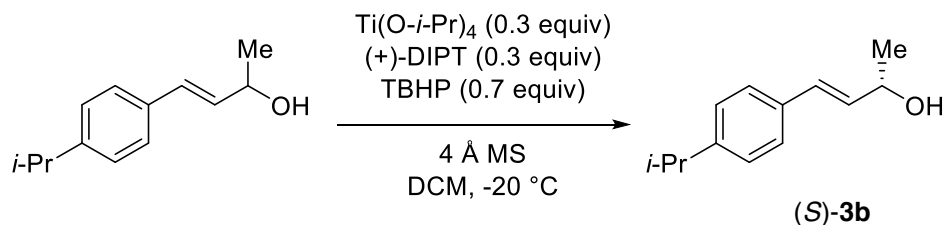

This procedure was adapted from that reported in the literature.<sup>2</sup> In an oven-dried, 100-mL round-bottomed flask, L-(+)-DIPT (0.74 mL, 3.54 mmol, 0.3 equiv) was added to a suspension of (*E*)-4-(4-isopropylphenyl)but-3-en-2-ol (1.76g, 11.8 mmol, 1.0 equiv), 4 Å MS (0.85 g, finely ground before use), and CH<sub>2</sub>Cl<sub>2</sub> (47 mL). The suspension was then cooled to -20 °C, and Ti(O-*i*Pr)<sub>4</sub> (1.06 mL, 3.54 mmol, 0.3 equiv) and TBHP (1.5 mL, 8.25 mmol, 5.5 M in decane, 0.7 equiv) were added. The mixture was stirred for 3 h at -20 °C. FeSO<sub>4</sub>·7H<sub>2</sub>O (6.5 g) and H<sub>2</sub>O (40 mL) were then added, followed by tartaric acid (2.2 g), H<sub>2</sub>O (20 mL), and aq. HCl (1.0 M, 30 mL) to dissolve the precipitate. The layers were separated. The organic layer was then washed with sat. NaCl, dried (Na<sub>2</sub>SO<sub>4</sub>), filtered, and concentrated. The resulting residue was purified by silica gel chromatography (15% Et<sub>2</sub>O/hexanes) to give compound (*S*)-**3b** (240 mg, 27%) as colorless oil. The enantiomeric excess was determined to be 92% by chiral HPLC analysis (CHIRALPAK IB, 1 mL/min, 4% *i*-PrOH/hexanes, λ=254 nm); t<sub>R</sub>(major) = 8.776 min, t<sub>R</sub>(minor) = 9.385 min. [α]<sub>24</sub><sup>D</sup> = +16.2 (c 0.33, CHCl<sub>3</sub>). The spectra data for this compound matches that reported in the literature.<sup>11</sup>

<sup>11</sup> Gładkowski, W.; Skrobiszewski, A.; Mazur, M.; Siepka, M.; Pawlak, A.; Obmińska-Mrukowicz, B.; Białońska, A.; Poradowski, D.; Drynda, A.; Urbaniak, M.; *Tetrahedron*, **2013**, 69, 10414.

## Preparation of Allylic Alcohols

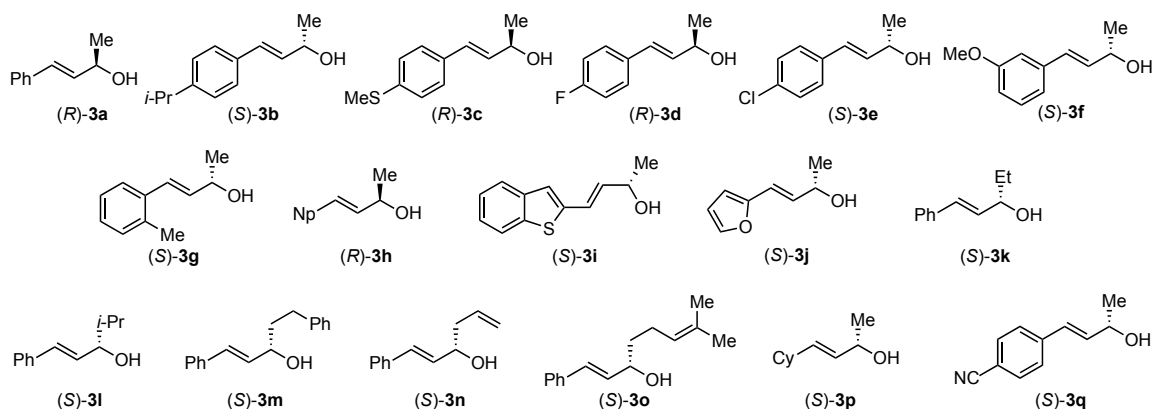

(*R*)-**3a**<sup>12</sup>, (*R*)-**3d**<sup>13</sup>, (*S*)-**3e**<sup>13</sup>, (*R*)-**3h**<sup>13</sup> were prepared via General Procedure E. (*S*)-**3b**<sup>14</sup>, (*R*)-**3c**<sup>15</sup>, (*S*)-**3f**<sup>13</sup>, (*S*)-**3g**<sup>15</sup>, (*S*)-**3i**, (*S*)-**3j**<sup>13</sup>, (*S*)-**3k**<sup>15</sup>, (*S*)-**3l**<sup>12</sup>, (*S*)-**3m**<sup>16</sup>, (*S*)-**3n**<sup>17</sup>, (*S*)-**3o**, (*S*)-**3p**<sup>18</sup>, and (*S*)-**3q**<sup>10</sup> were prepared via General Procedure F.

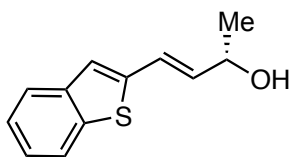

**((S)-3i)**. Prepared following General Procedure F. The enantiomeric excess was determined to be 70% by chiral HPLC analysis (CHIRALPAK IC, 1 mL/min, 3% *i*-PrOH/hexanes,  $\lambda=254$  nm);  $t_R(\text{major}) = 21.095$  min,  $t_R(\text{minor}) = 23.755$  min. <sup>1</sup>H NMR (600 MHz, CDCl<sub>3</sub>)  $\delta$  7.84 – 7.67 (m, 2H), 7.35 – 7.29 (m, 2H), 7.28 (s, 1H), 6.92 – 6.78 (m, 1H), 6.22 (dd,  $J = 15.6, 6.0$  Hz, 1H), 4.58 – 4.50 (m, 1H), 1.62 (s, 1H), 1.42 (d,  $J = 6.4$  Hz, 3H); <sup>13</sup>C NMR (151 MHz, CDCl<sub>3</sub>)  $\delta$  142.0, 140.1, 138.9, 135.8, 124.7, 124.4, 123.4, 123.2, 123.0, 122.2, 68.5, 23.4.

<sup>12</sup> Ohkuma, T.; Koizumi, M.; Doucet, H.; Pham, T.; Kozawa, M.; Murata, K.; Katayama, E.; Yokozawa, T.; Ikariya, T.; Noyori, R. *J. Am. Chem. Soc.* **1998**, *120*, 13529.

<sup>13</sup> He, P.; Liu, X.; Zheng, H.; Li, W.; Lin, L.; Feng, X. *Org. Lett.* **2012**, *14*, 5134.

<sup>14</sup> Gładkowski, W.; Skrobiszewski, A.; Mazur, M.; Siepka, M.; Pawlak, A.; Obmińska-Mrukowicz, B.; Białońska, A.; Poradowski, D.; Drynda, A.; Urbaniak, M. *Tetrahedron* **2013**, *69*, 10414.

<sup>15</sup> Li, X.; Li, L.; Tang, Y.; Zhong, L.; Cun, L.; Zhu, J.; Liao, J.; Deng, J. *J. Org. Chem.* **2010**, *75*, 2981.

<sup>16</sup> Hodgson, D. M.; Persaud, R. S. D. *Org. Biomol. Chem.* **2012**, *10*, 7949.

<sup>17</sup> Couto, T. R.; Freitas, J. C. R.; Cavalcanti, I. H.; Oliveira, R. A.; Menezes, P. H. *Tetrahedron* **2013**, *69*, 7006.

<sup>18</sup> Barker, G.; Johnson, D. G.; Young, P. C.; Macgregor, S. A.; Lee, A.-L. *Chem. Eur. J.* **2015**, *21*, 13748.

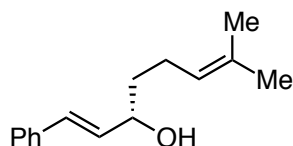

**((S)-30).** Prepared as a colorless oil following General Procedure F in 41% yield. The enantiomeric excess was determined to be 80% by chiral HPLC analysis (CHIRALPAK IC, 1.0 mL/min, 3% *i*-PrOH/hexanes,  $\lambda=254$  nm);  $t_R(\text{major}) = 10.883$  min,  $t_R(\text{minor}) = 13.071$  min.  $[\alpha]_{24}^D = +17.1$  (c 0.26, MeOH):  $^1\text{H NMR}$  (600 MHz,  $\text{CDCl}_3$ )  $\delta$  7.42 - 7.20 (m, 5H), 6.58 (d,  $J = 15.9$  Hz, 1H), 6.23 (dd,  $J = 15.9, 6.6$  Hz, 1H), 5.16 (t,  $J = 7.2$  Hz, 1H), 4.30 (q,  $J = 6.5$  Hz, 1H), 2.12 (q,  $J = 7.5$  Hz, 2H), 1.85 – 1.49 (m, 8H);  $^{13}\text{C NMR}$  (151 MHz,  $\text{CDCl}_3$ )  $\delta$  136.8, 132.5, 132.3, 130.2, 128.6, 127.6, 126.5, 123.9, 72.7, 37.3, 25.7, 24.1, 17.7; FTIR (NaCl/thin film) 3321, 2973, 2949, 2042, 1154, 776  $\text{cm}^{-1}$ ; HRMS (LIFDI)  $[\text{M}+\text{H}]$  calculated for:  $\text{C}_{15}\text{H}_{20}\text{O}$ : 216.1514, found: 216.1521.

#### Preparation of (*S,E*)-1-phenylhept-2-en-1-ol ((*S*)-3r).

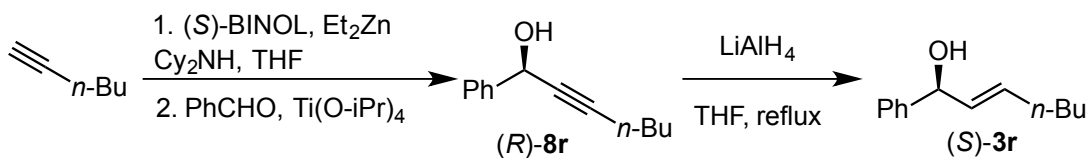

The following procedure was adapted from that reported in the literature.<sup>19</sup> In an oven-dried round-bottomed flask was placed (*S*)-BINOL (573 mg, 2 mmol, 0.4 equiv),  $\text{Cy}_2\text{NH}$  (50  $\mu\text{L}$ , 0.25 mmol, 0.05 equiv), and THF (20 mL). The mixture was cooled to 0  $^\circ\text{C}$ , before  $\text{Et}_2\text{Zn}$  (1.53 mL, 15 mmol, 3.0 equiv) was added. The mixture was then stirred at room temperature for 16 h. 1-Hexyne (1.73 mL, 15 mmol, 3.0 equiv) was added, and the mixture was stirred at room temperature for additional 8 h. The mixture was cooled to 0  $^\circ\text{C}$ , before  $\text{Ti}(\text{O}i\text{-Pr})_4$  (1.49 mL, 5 mmol, 1.0 equiv) and then benzaldehyde (0.5 mL, 5 mmol, 1.0 equiv) were added. The mixture was stirred at room temperature for another 16 h. The reaction was quenched with sat.  $\text{NH}_4\text{Cl}$  and extracted with EtOAc. The organic layer was washed with sat. NaCl, dried ( $\text{MgSO}_4$ ), filtered, and concentrated. The crude mixture was purified on silica gel chromatography (0–40% EtOAc/hexanes) to give (*R*)-

<sup>19</sup> Chen, W.; Tay, J.H.; Ying, J.; Yu, X.Q.; Pu, L. *J. Org. Chem.* **2013**, 78, 2256.

**8r** (787mg, 84%) as a yellow oil. The enantiomeric excess was determined to be 94% by chiral HPLC analysis (CHIRALPAK IB, 1.0 mL/min, 3.0% *i*-PrOH/hexane,  $\lambda = 210$  nm);  $t_R(\text{major}) = 12.39$  min,  $t_R(\text{minor}) = 9.24$  min. The spectral data of this compound matches of that reported in the literature.<sup>5</sup>

In a round-bottomed flask equipped with a condenser was placed LiAlH<sub>4</sub> (174 mg, 4.6 mmol, 1.5 equiv) and THF (5 mL). A solution of (*R*)-**8r** (577 mg, 3.06 mmol, 1.0 equiv, 94% ee) and THF (10.3 mL) was added at room temperature. Then the mixture was refluxed for 1.5 h. The mixture was cooled in an ice-water bath, before the reaction was carefully quenched with sat. NH<sub>4</sub>Cl. The product was extracted with Et<sub>2</sub>O. The organic layer was washed with sat. NaCl, dried (MgSO<sub>4</sub>), filtered, and concentrated. The crude mixture was purified on silica gel chromatography (5–10% Et<sub>2</sub>O/hexanes) to give (*S*)-**3r** (400 mg, 69%) as a colorless oil. The spectra data of (*S*)-**3r** matches that reported in the literature.<sup>20</sup> The enantiomeric excess was considered to be 94% based on the precursor (*R*)-**8r**.

---

<sup>20</sup> Lurain, A. E.; Carroll, P. J.; Walsh, P. J. *J. Org. Chem.* **2005**, *70*, 1262.

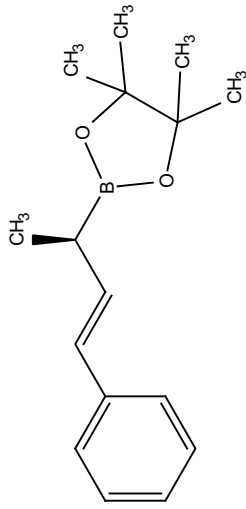

**(R)-2a**  
via General Procedure A

7.354  
7.352  
7.340  
7.338  
7.286  
7.274  
7.260  
7.177  
7.175  
7.173  
7.166  
7.163  
7.160  
7.151  
6.347  
6.344  
6.340

6.35  
6.34  
6.34  
6.34

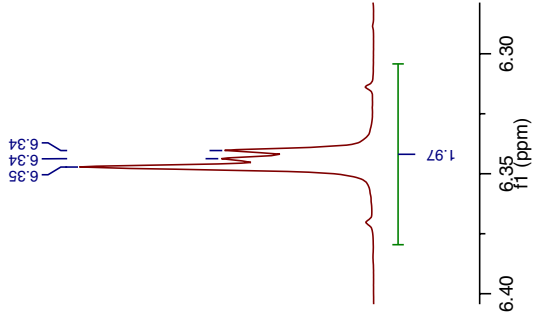

3.17  
3.16

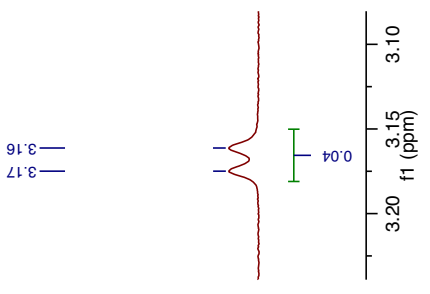

1.244  
1.198  
1.186

12.07  
3.01

0.97

0.04

0.05

0.05

1.97

1.96  
2.08  
1.00

7.282  
7.280  
7.266  
7.214  
7.201  
7.188  
7.105  
7.103  
7.101  
7.094  
7.091  
7.088  
7.081  
7.079  
7.076

6.275  
6.272  
6.268

1.172  
1.126  
1.114

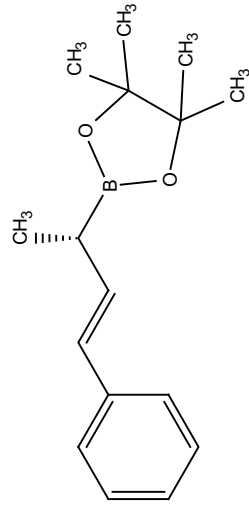

(S)-2a

via General Procedure B

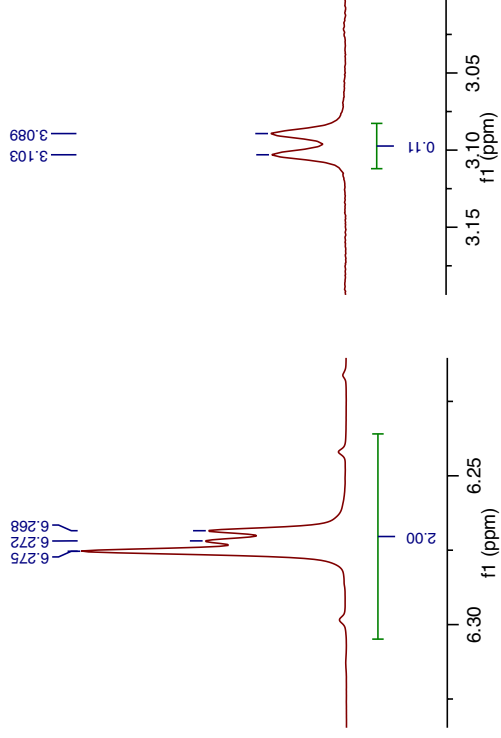

3.103  
3.089

6.275  
6.272  
6.268

12.18  
3.05

0.97

0.11

0.12

0.12

2.00

2.00  
1.99  
1.04

S48



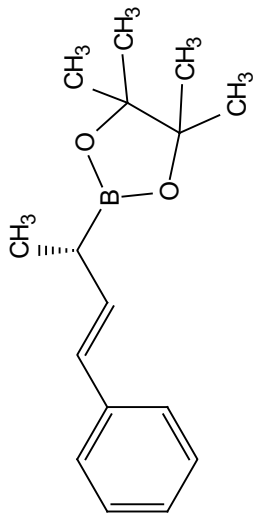

(S)-2a  
via General Procedure B

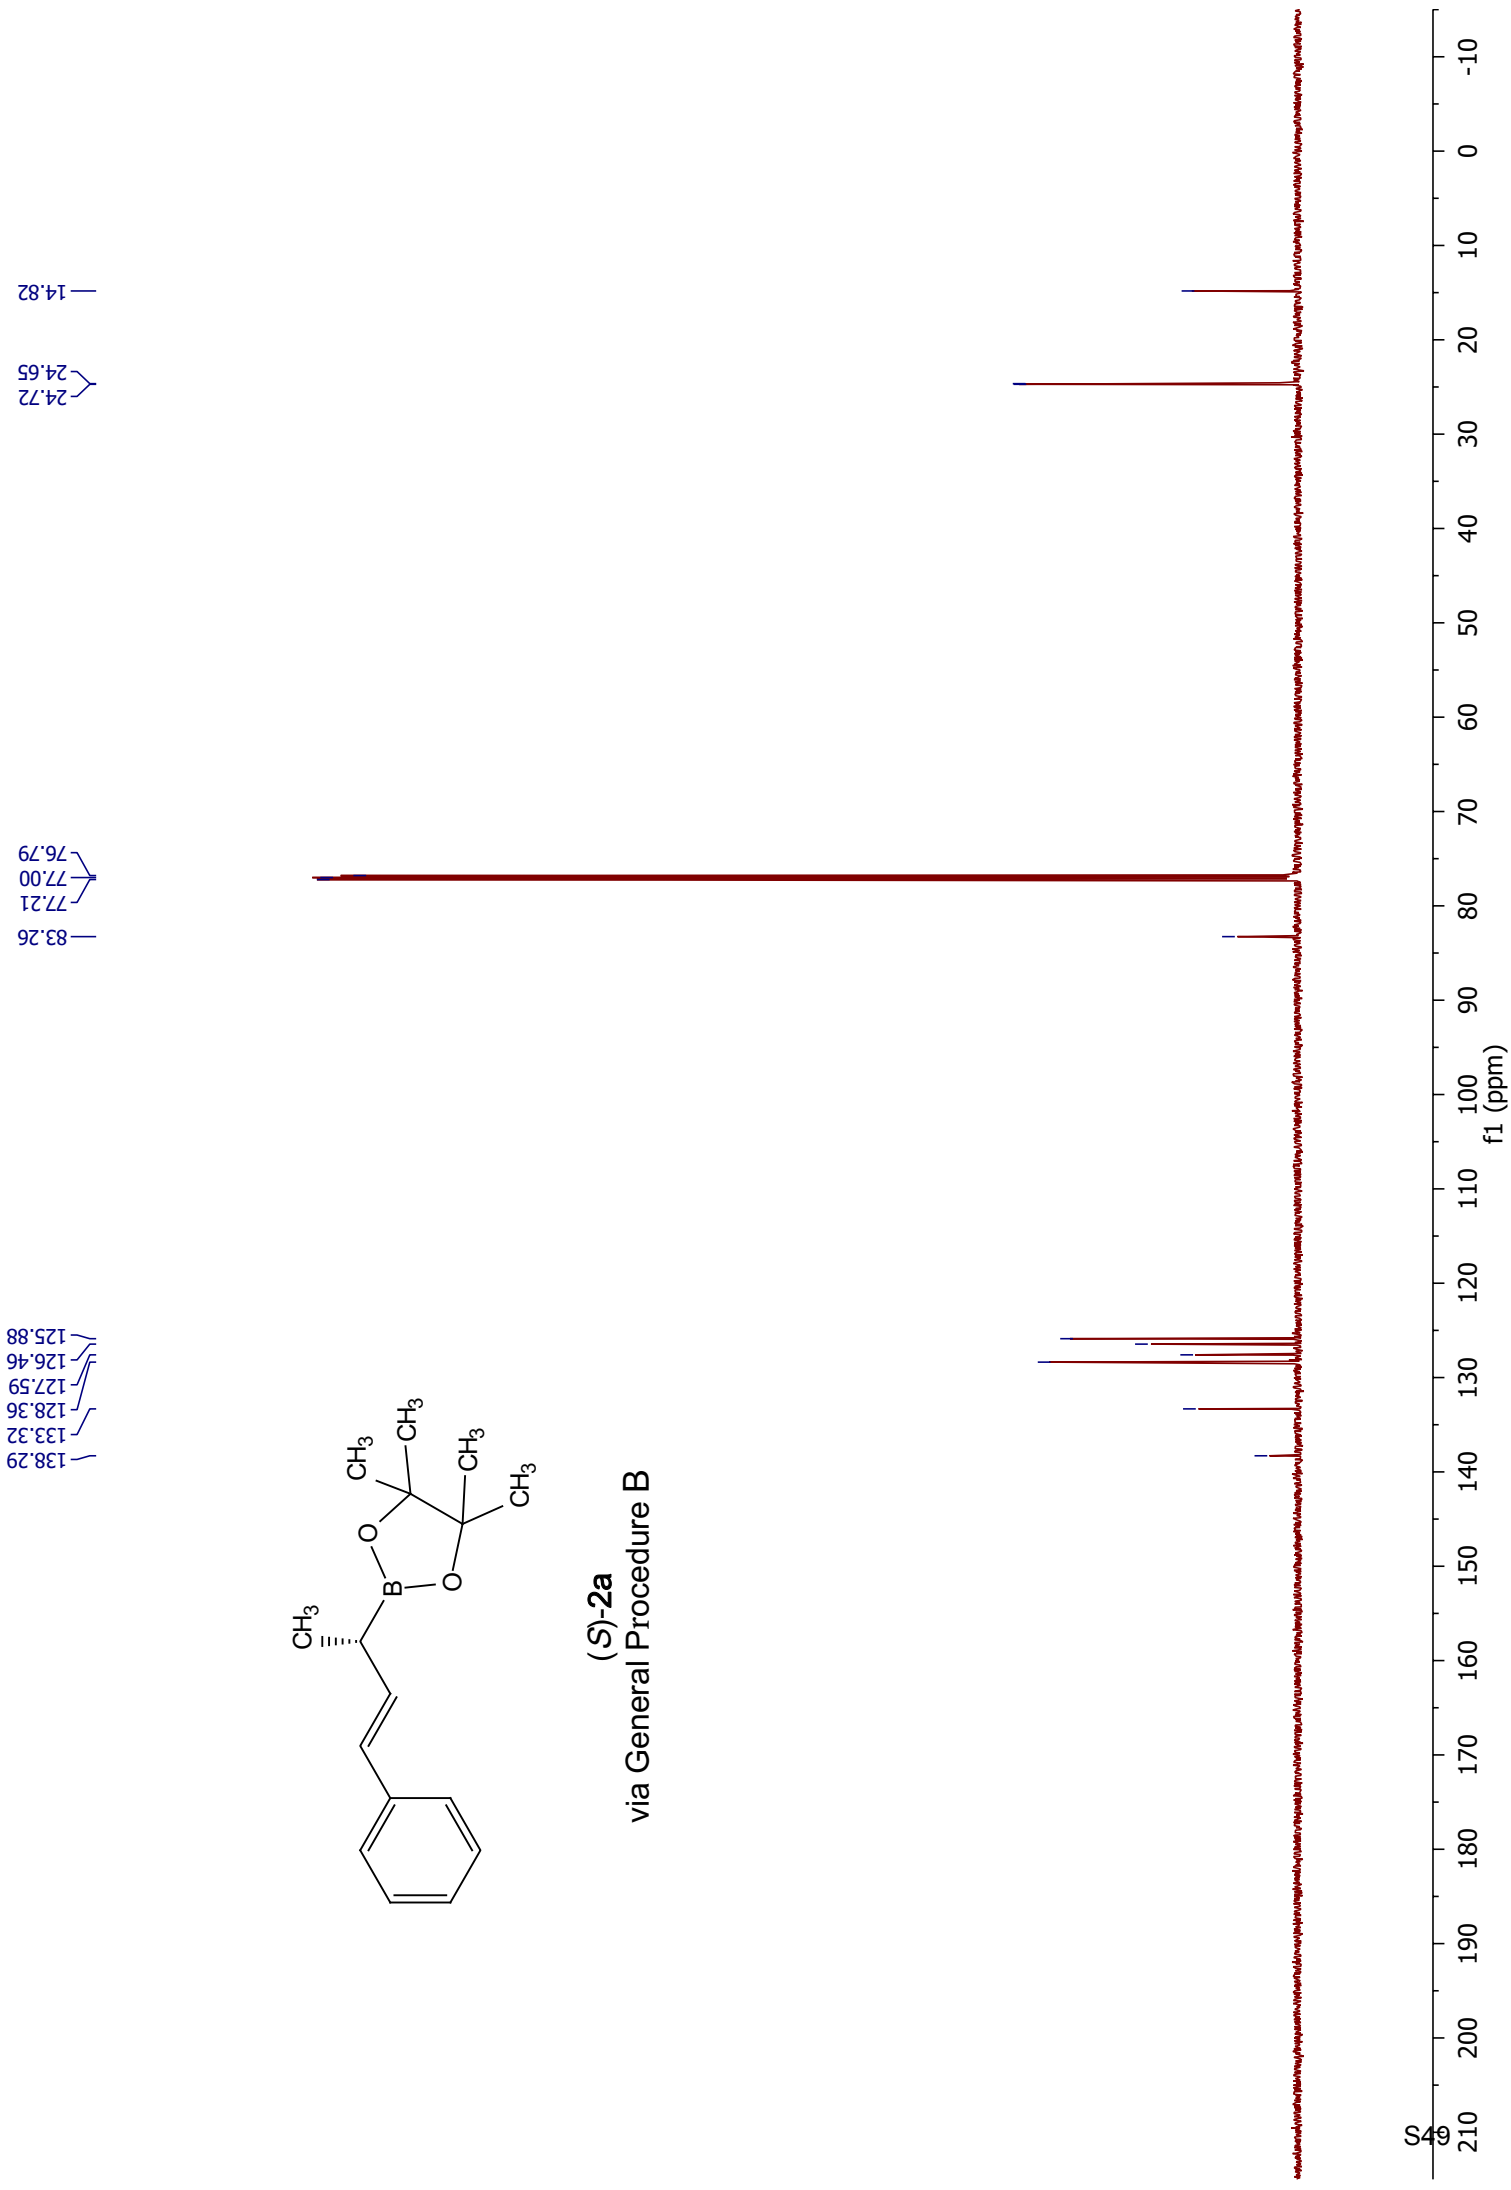

7.2858  
7.2723  
7.2600  
7.1485  
7.1349  
6.3418  
6.3153  
6.3012  
6.2896  
6.2747  
6.2631

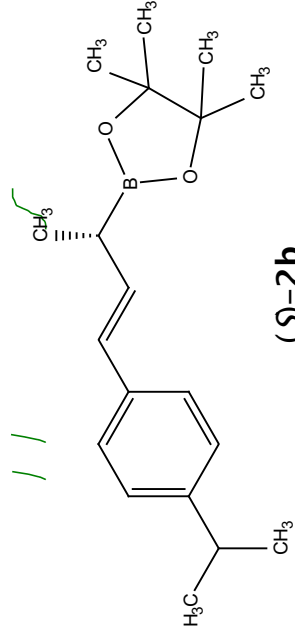

(S)-2b

via General Procedure A

3.1433  
3.1293  
2.9061  
2.8946  
2.8831  
2.8715  
2.8600  
2.8484  
2.8370  
2.0673  
2.0553  
2.0433  
2.0314  
2.0194

1.2377  
1.2284  
1.1858  
1.1737

2.0673  
2.0553  
2.0433  
2.0314  
2.0194

3.1433  
3.1293

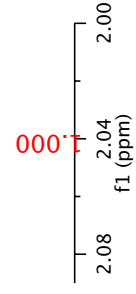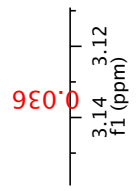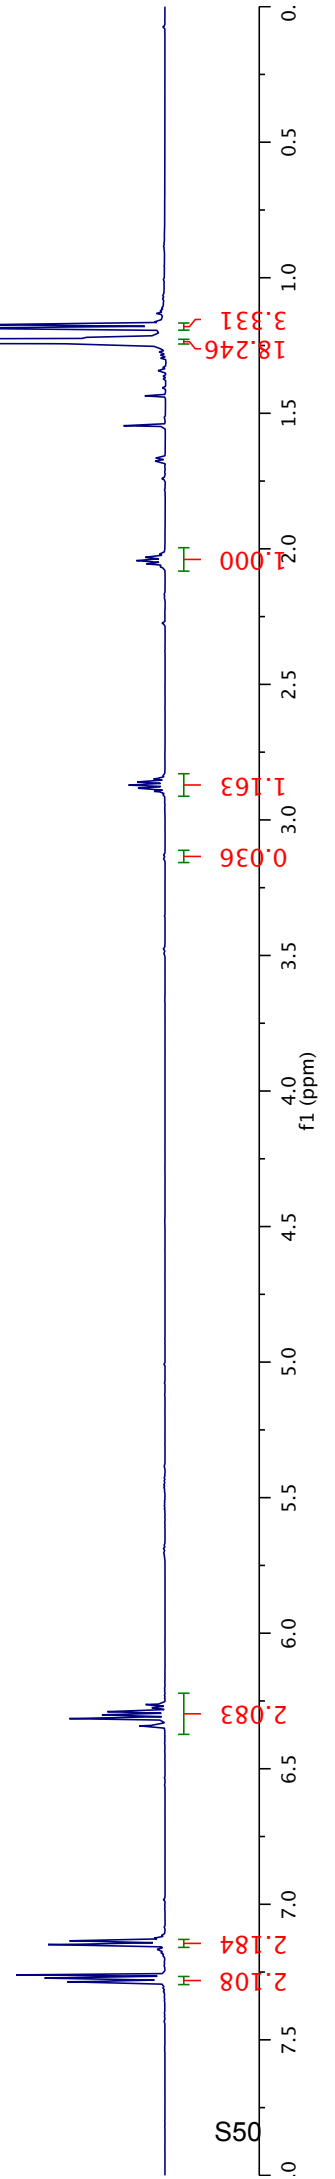

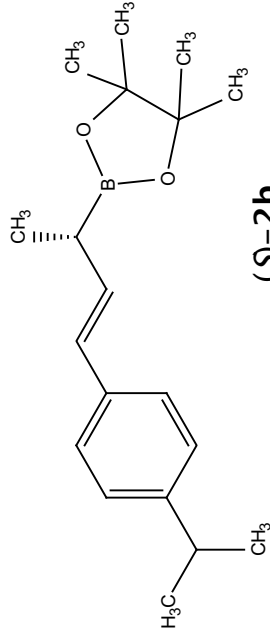

(S)-2b

via General Procedure A

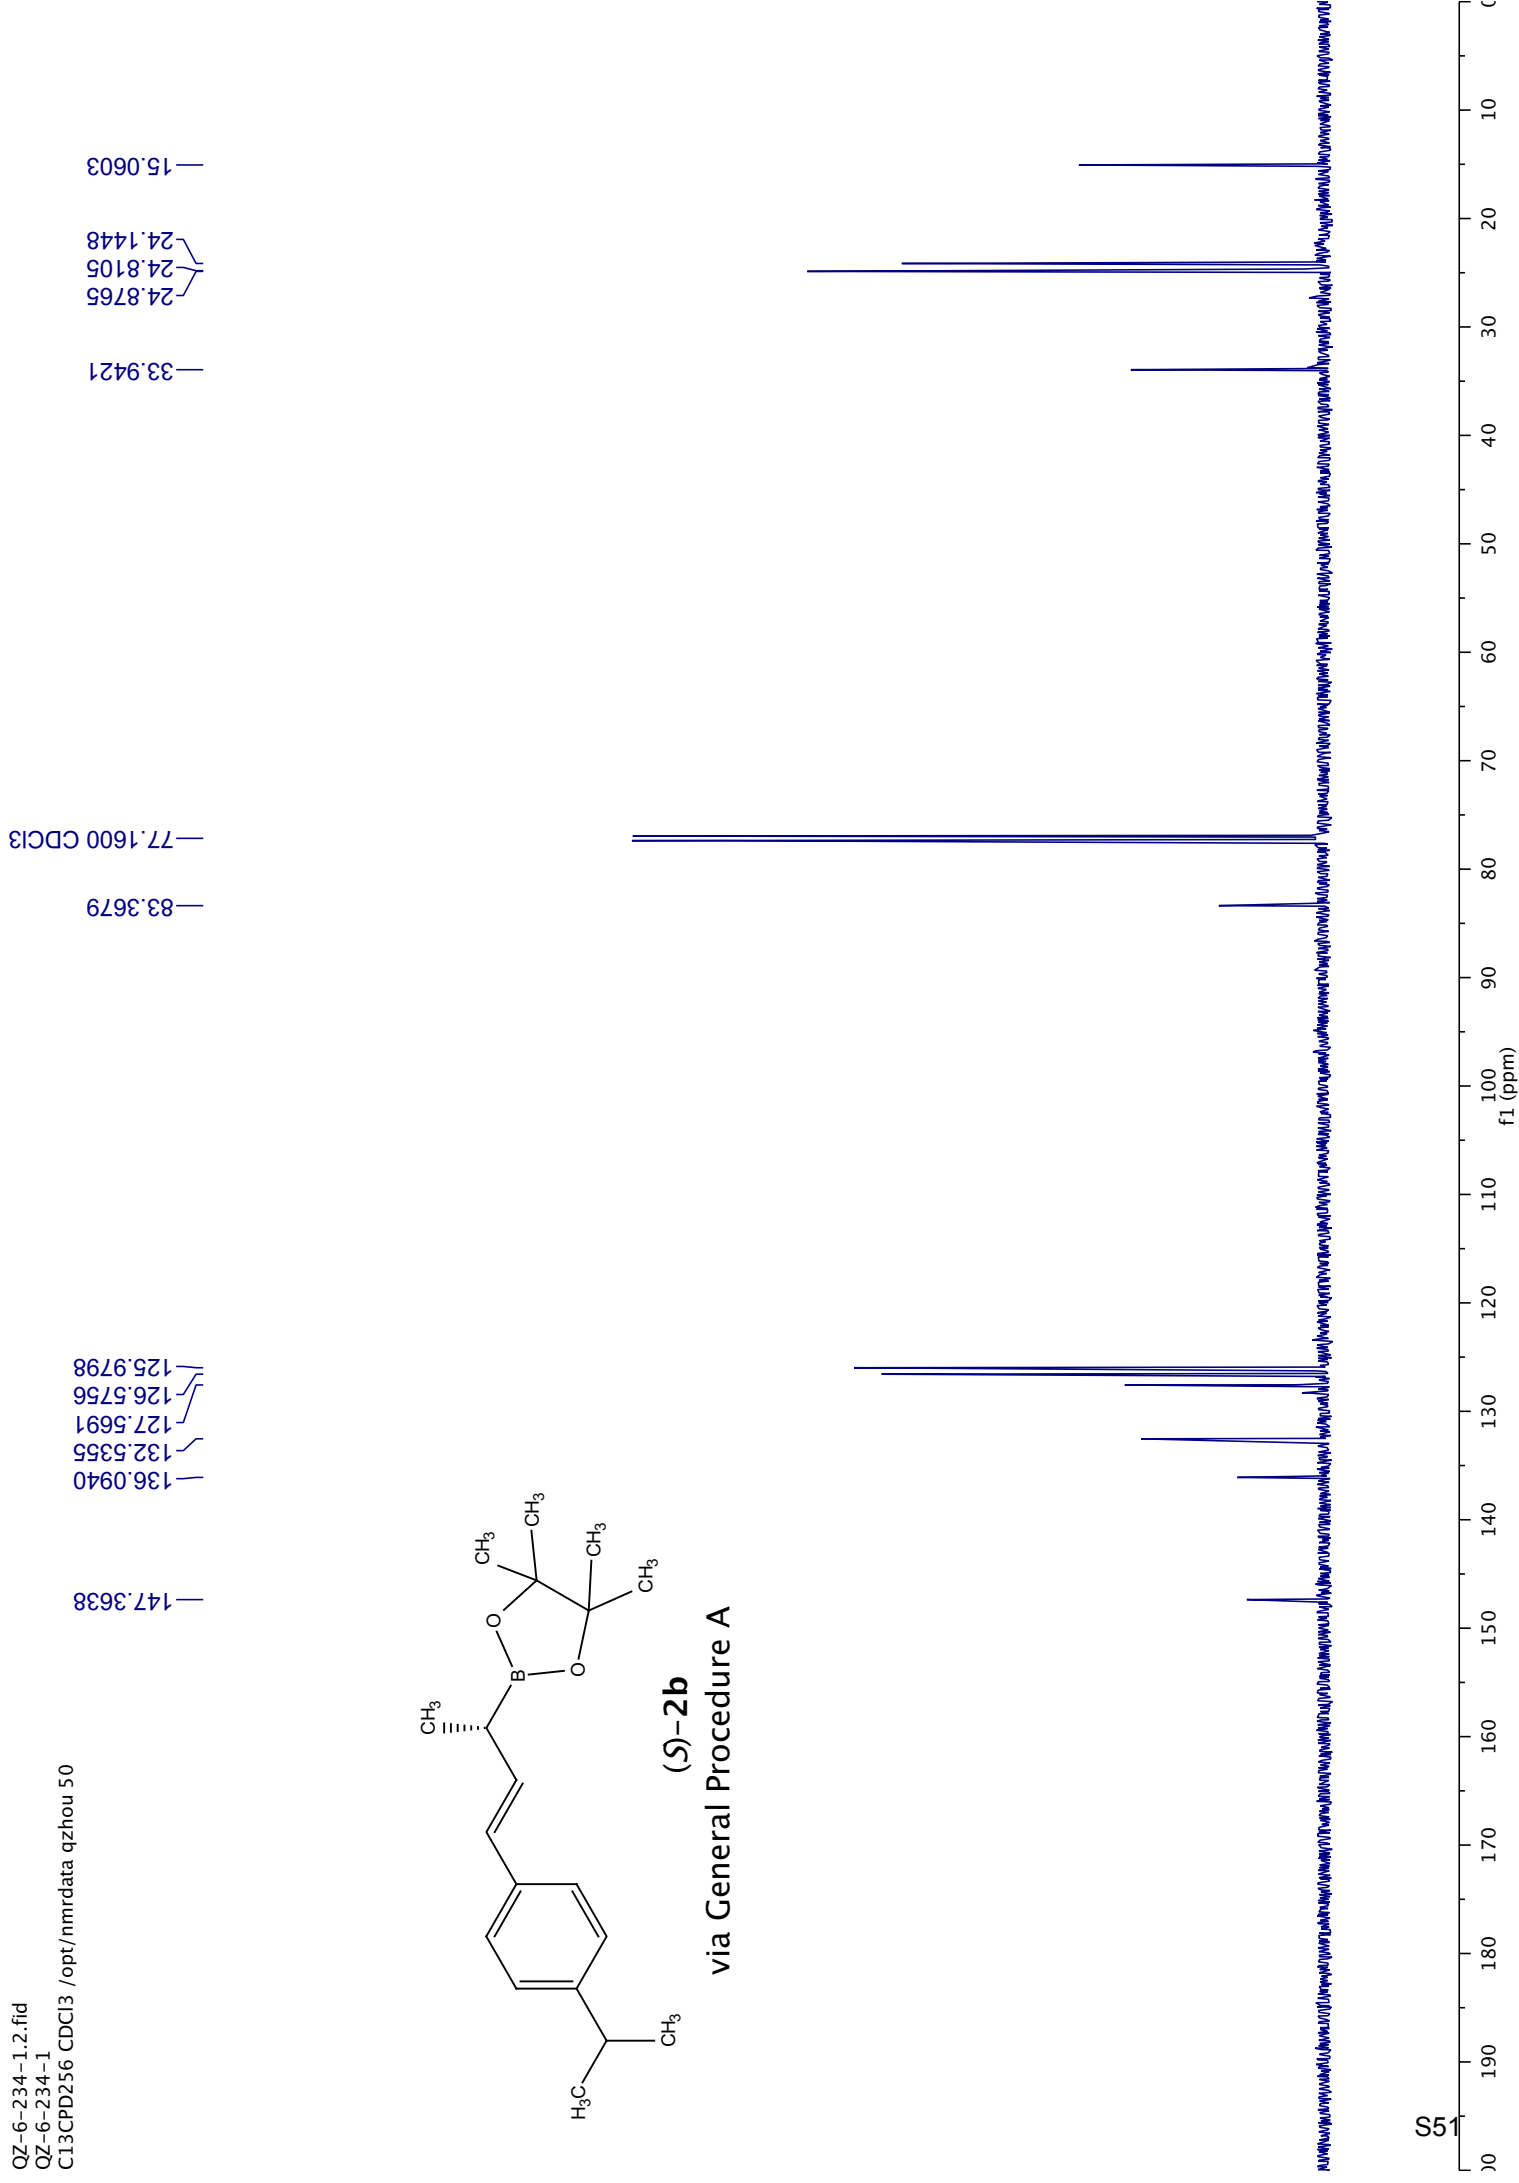

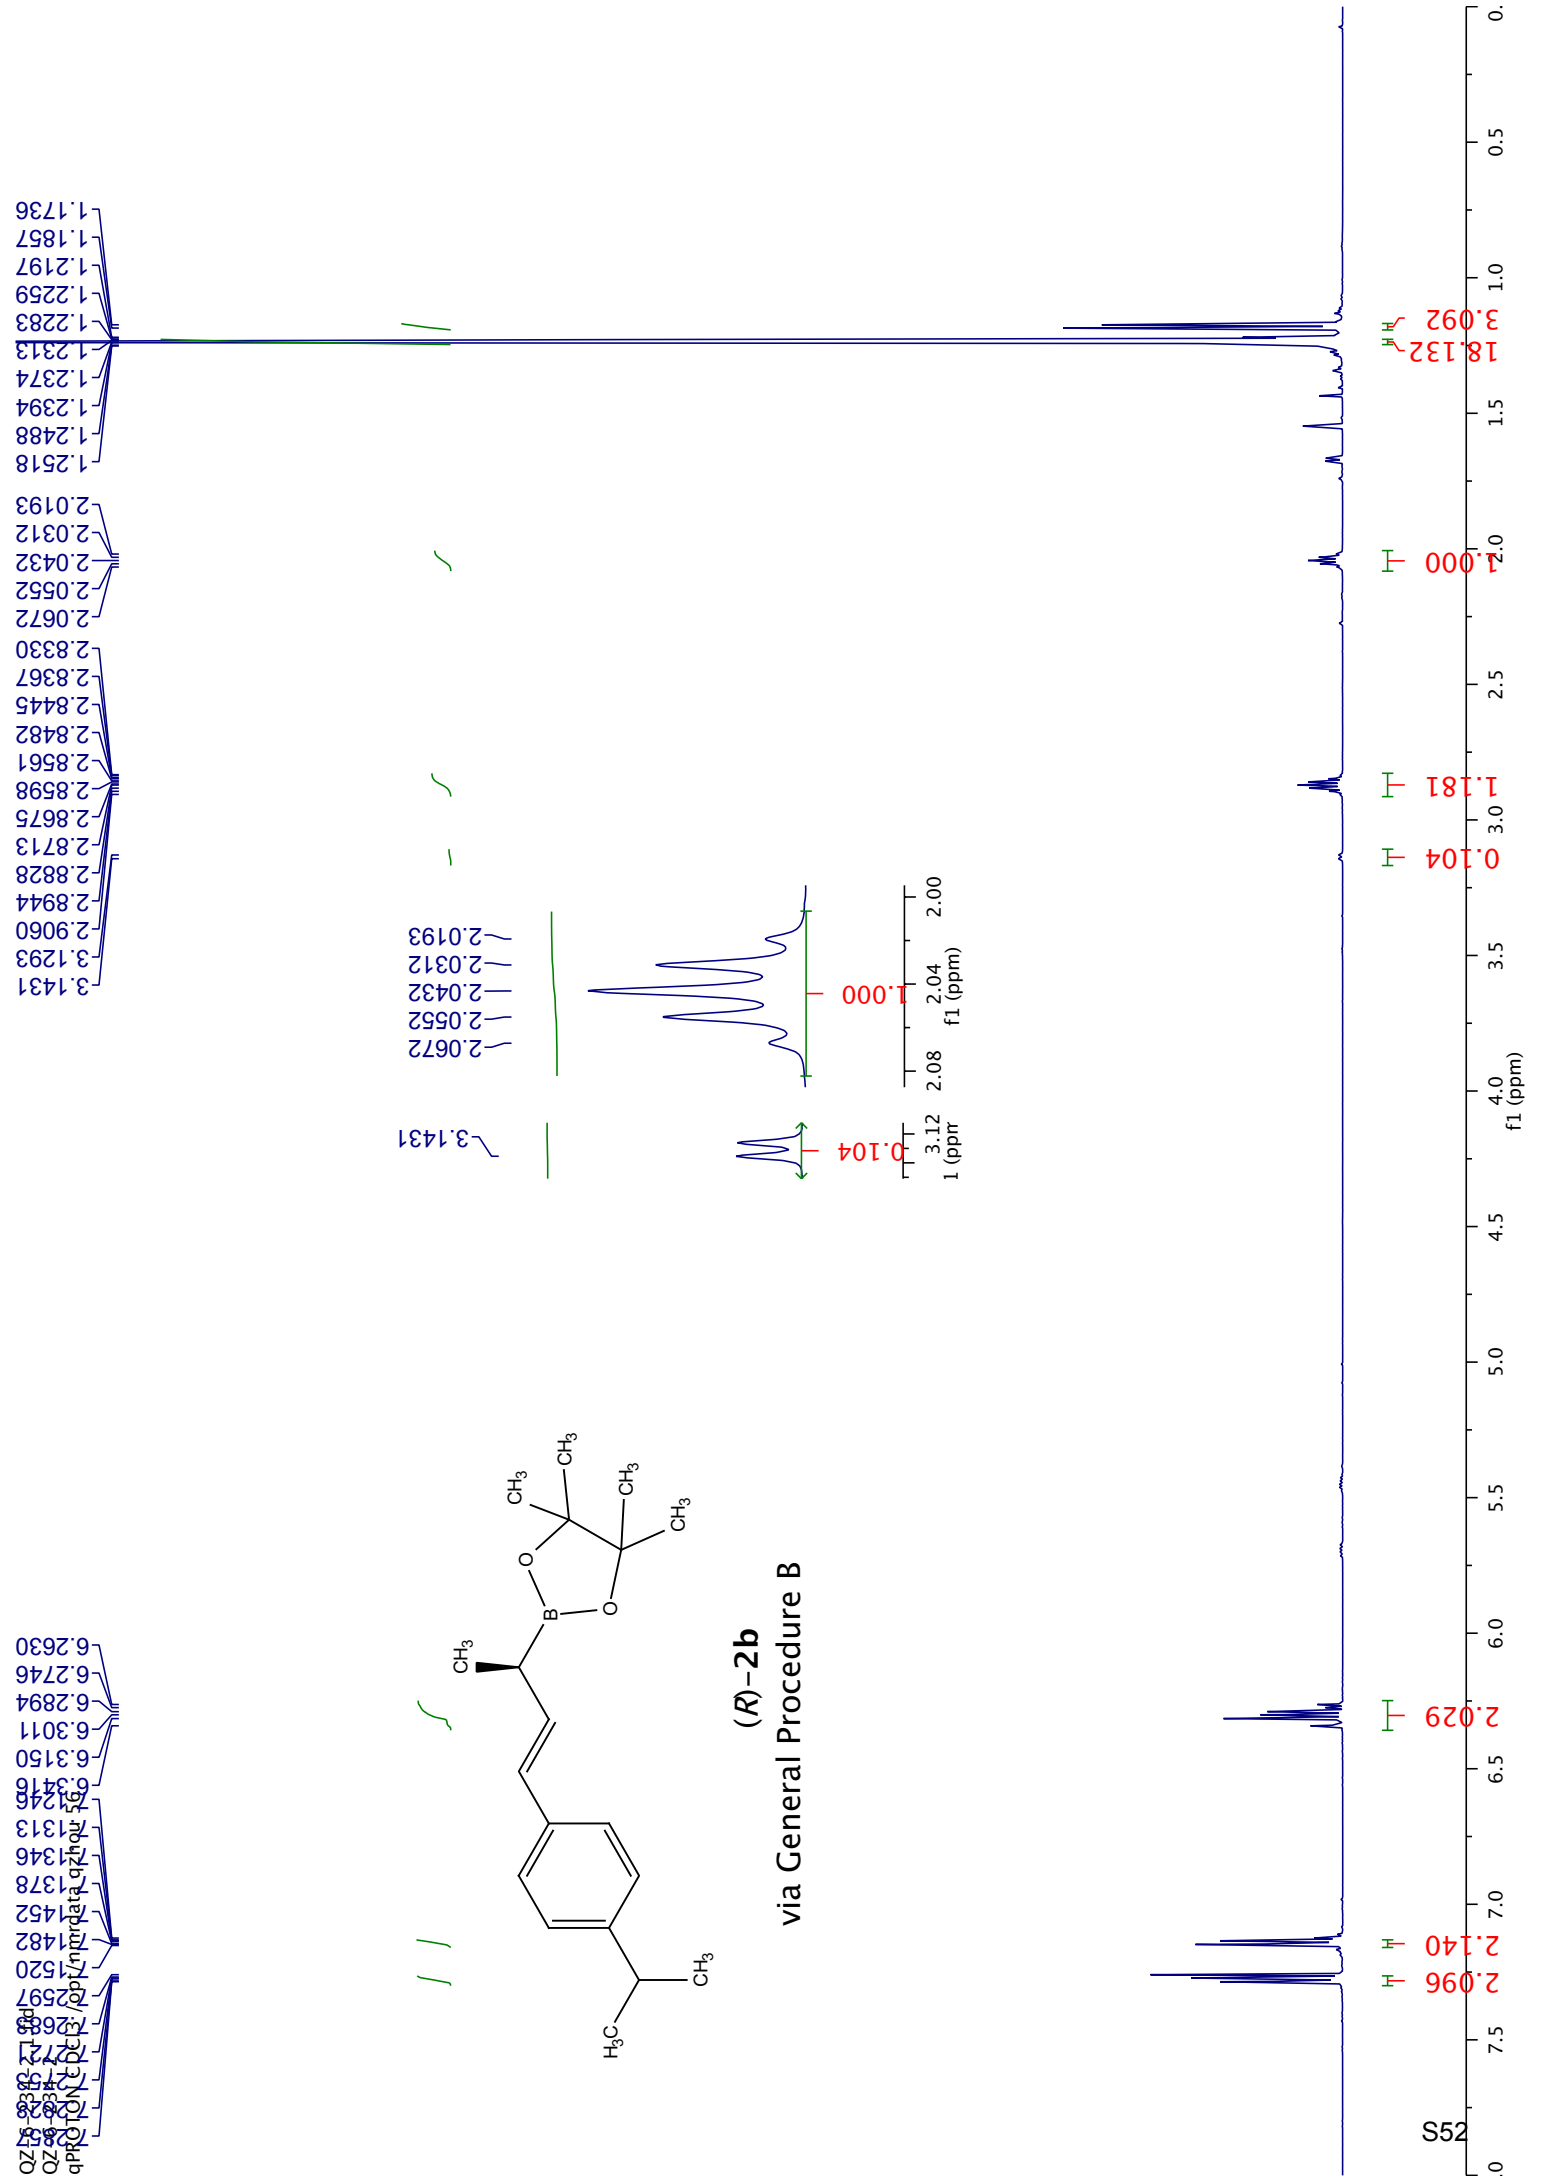

QZ-6-2555-1  
QZ-6-2555-1  
qPROTON CDCl<sub>3</sub> opt/nmrdata qzhou 40

7.274  
7.271  
7.260  
7.190  
7.187  
7.183  
7.176  
7.173  
7.169

6.301  
6.299  
6.295

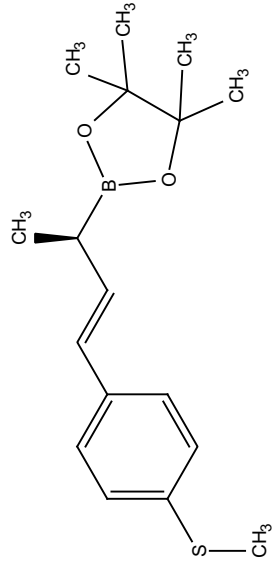

(R)-2c  
via General Procedure A

1.239  
1.187  
1.175

2.080  
2.065  
2.058  
2.053  
2.046  
2.041  
2.035  
2.029

2.468

5.471  
5.460  
5.458  
5.449  
5.448  
5.435  
5.424  
5.422

6.328  
6.322  
6.301  
6.299  
6.295  
6.272

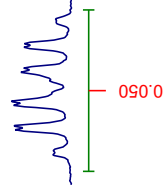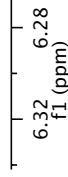

2.190  
3.091

0.978

2.974

0.054

0.050

2.000

2.210  
1.989

553

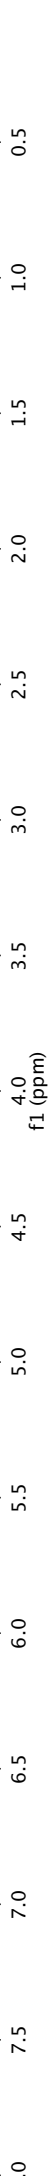

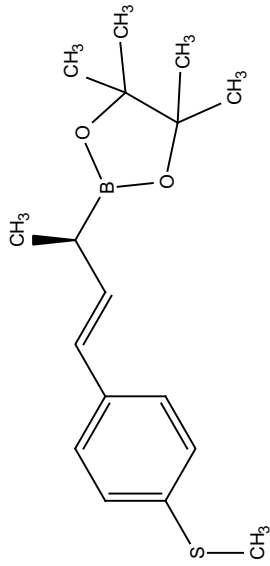

**(R)-2c**

via General Procedure A

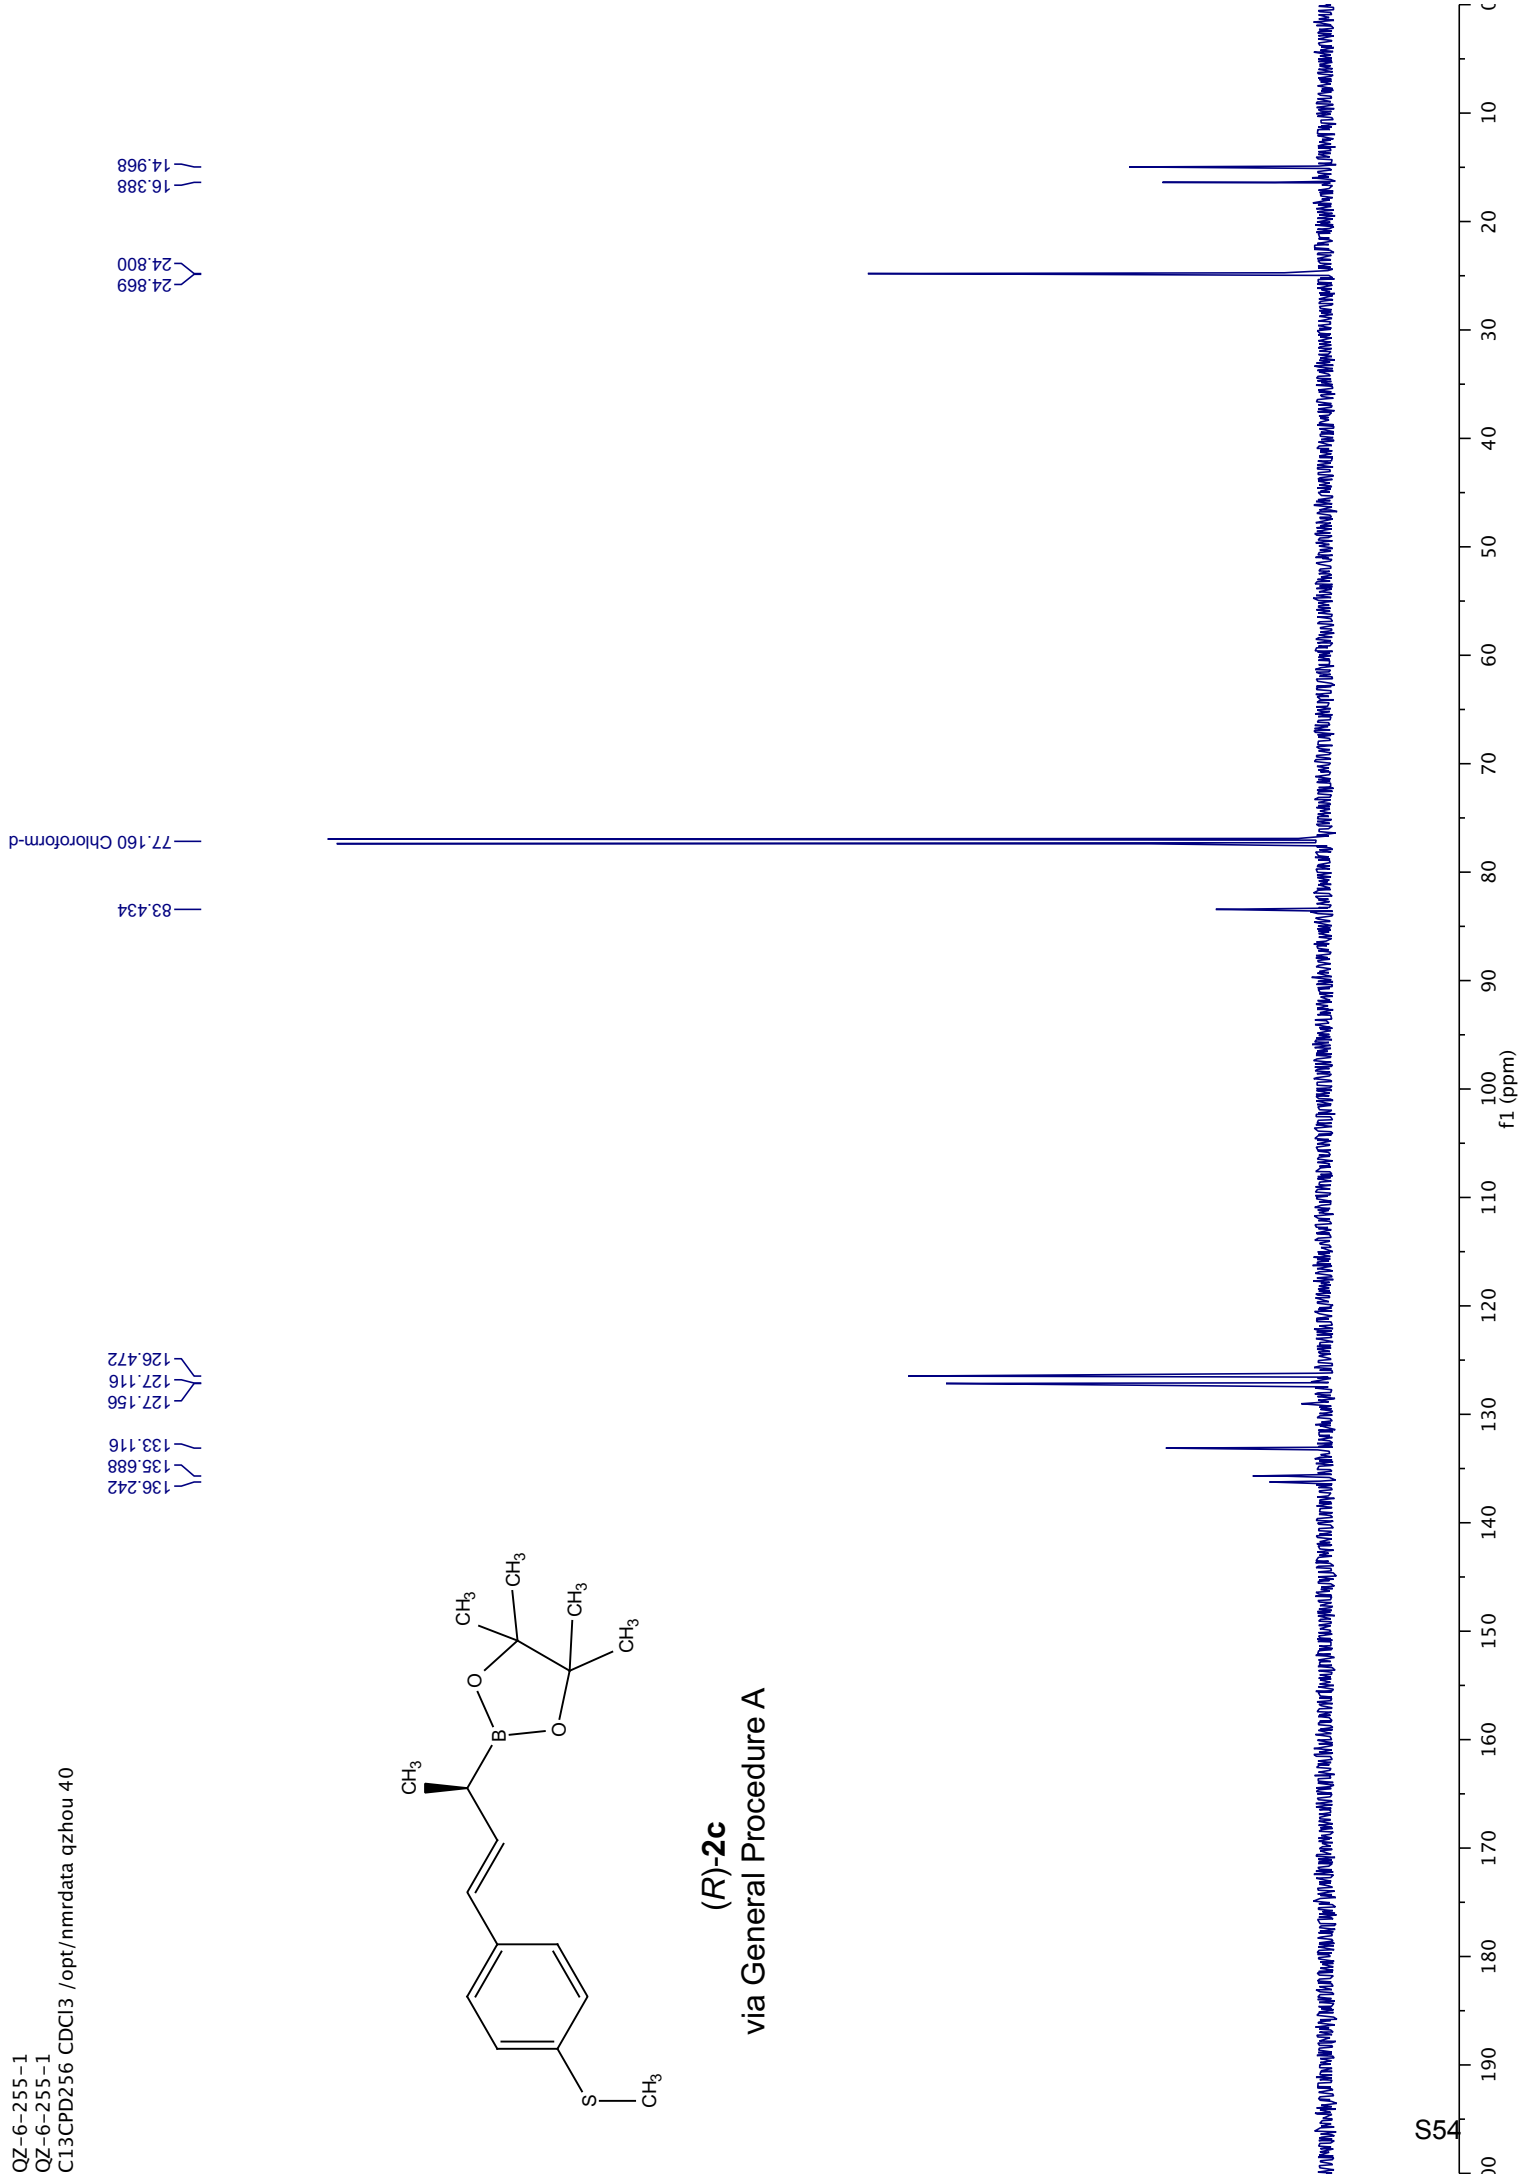

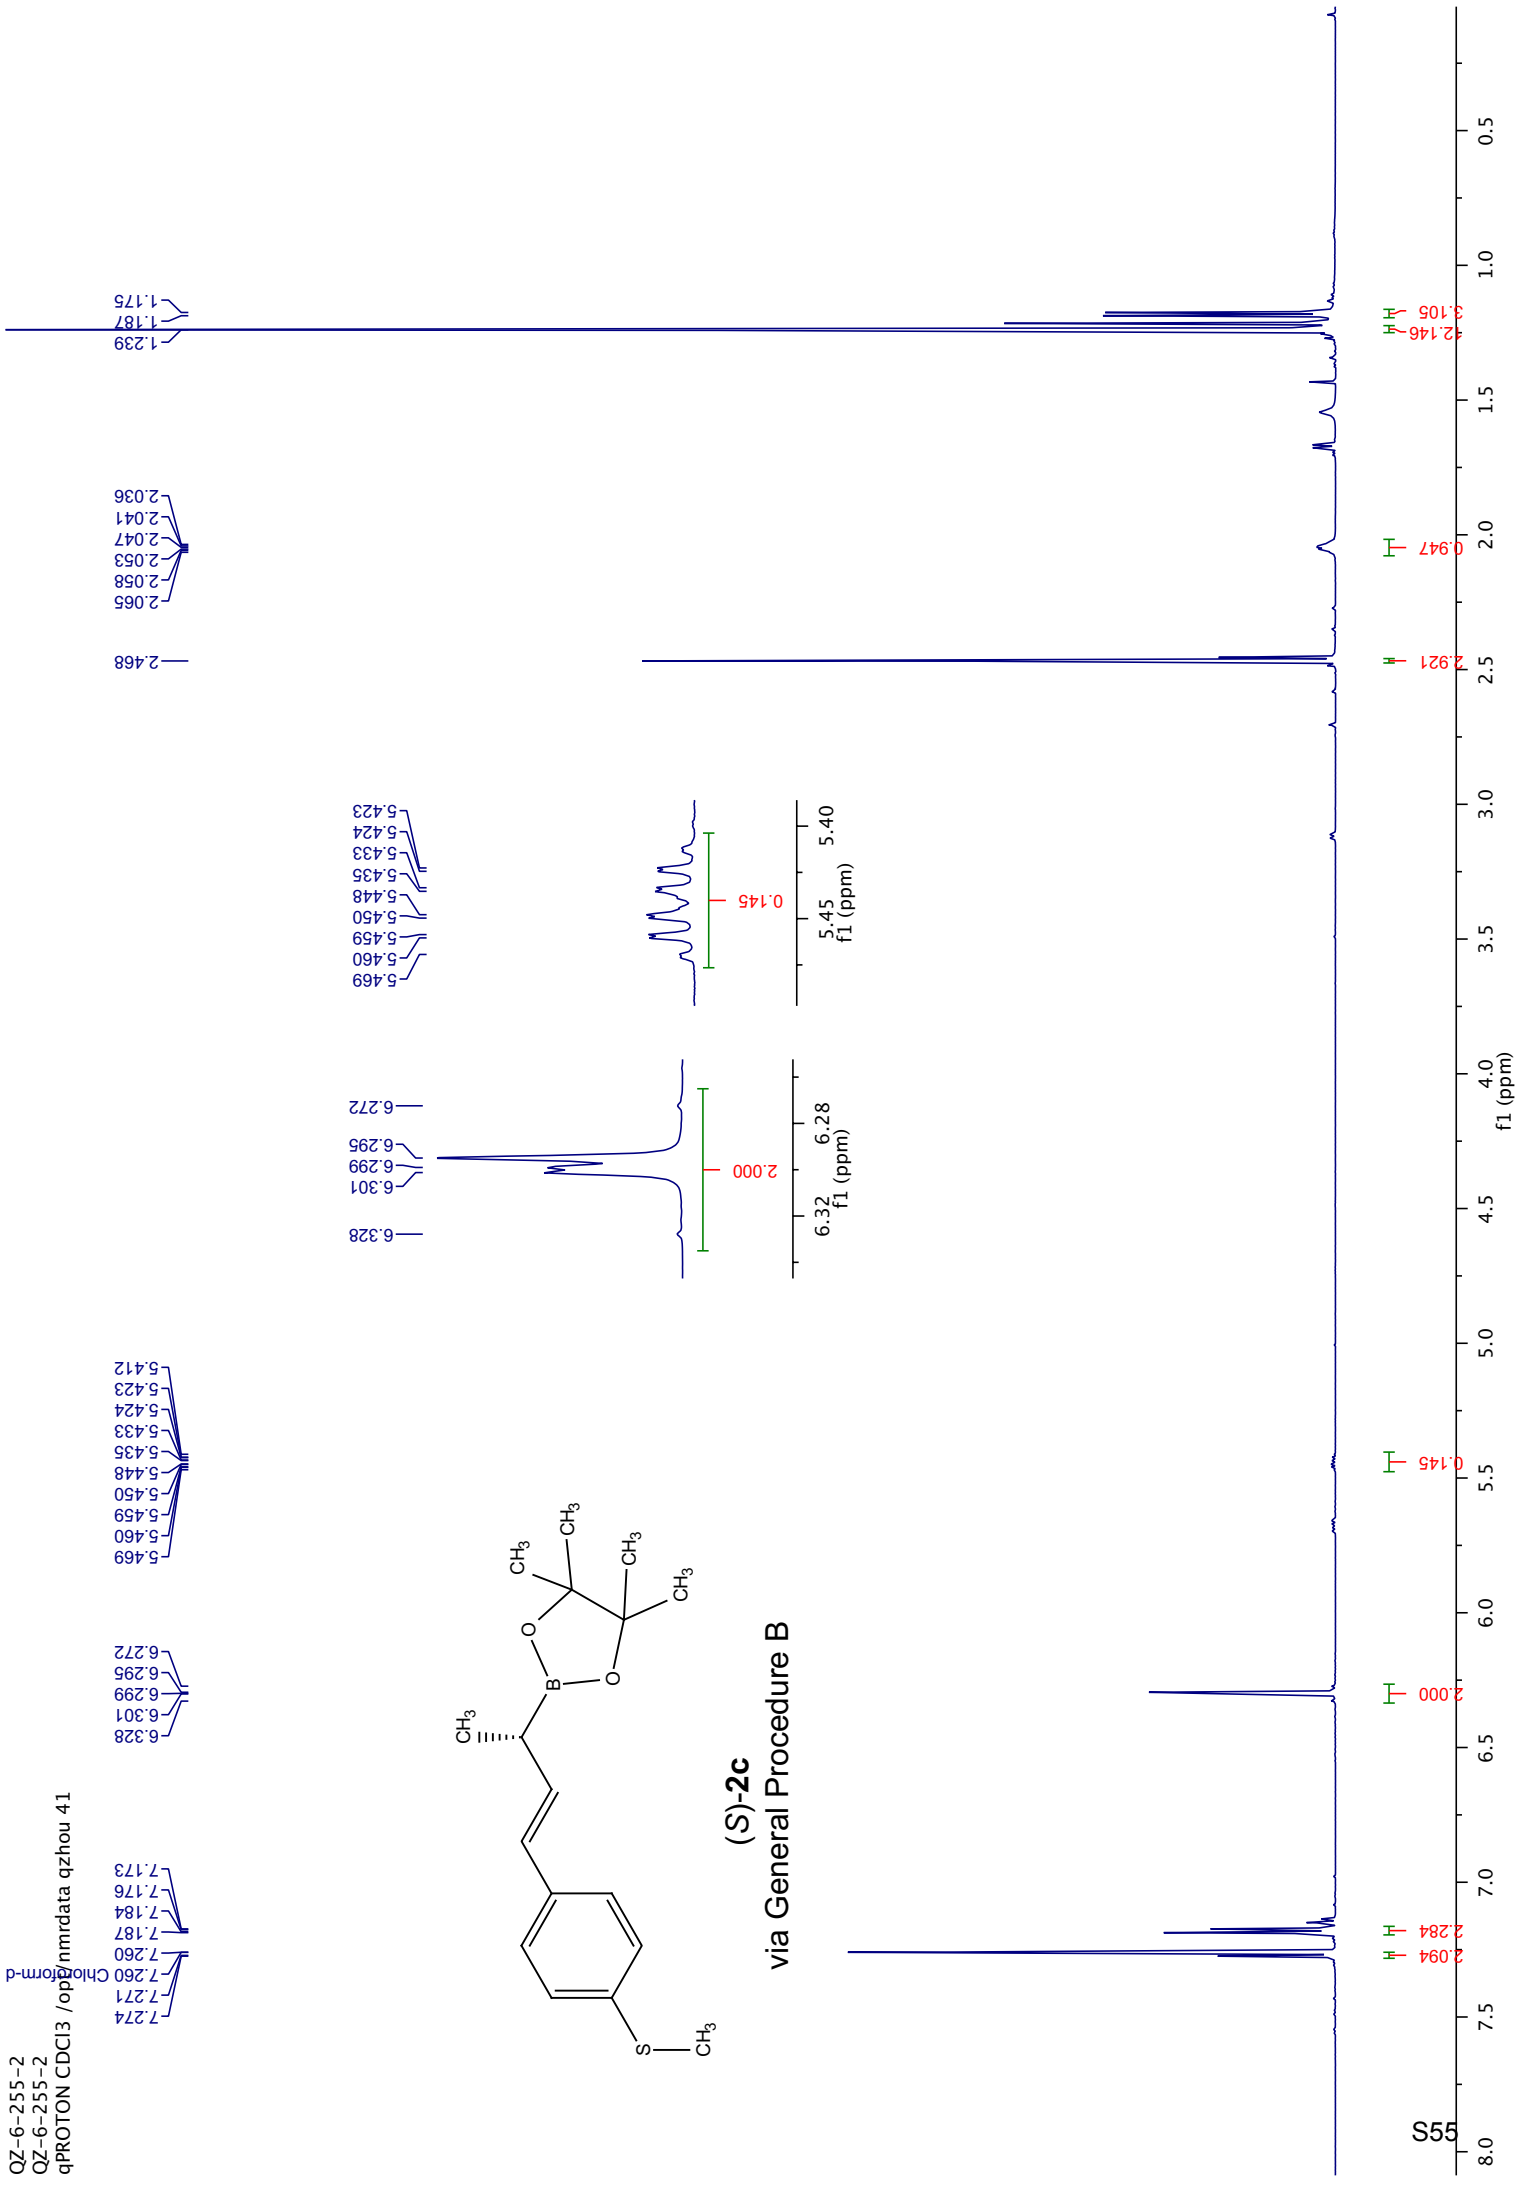

QZ-6-253.1.fid  
QZ-6-253  
qPROTON CDCl3 /opt/nmrdata qzzhou 1

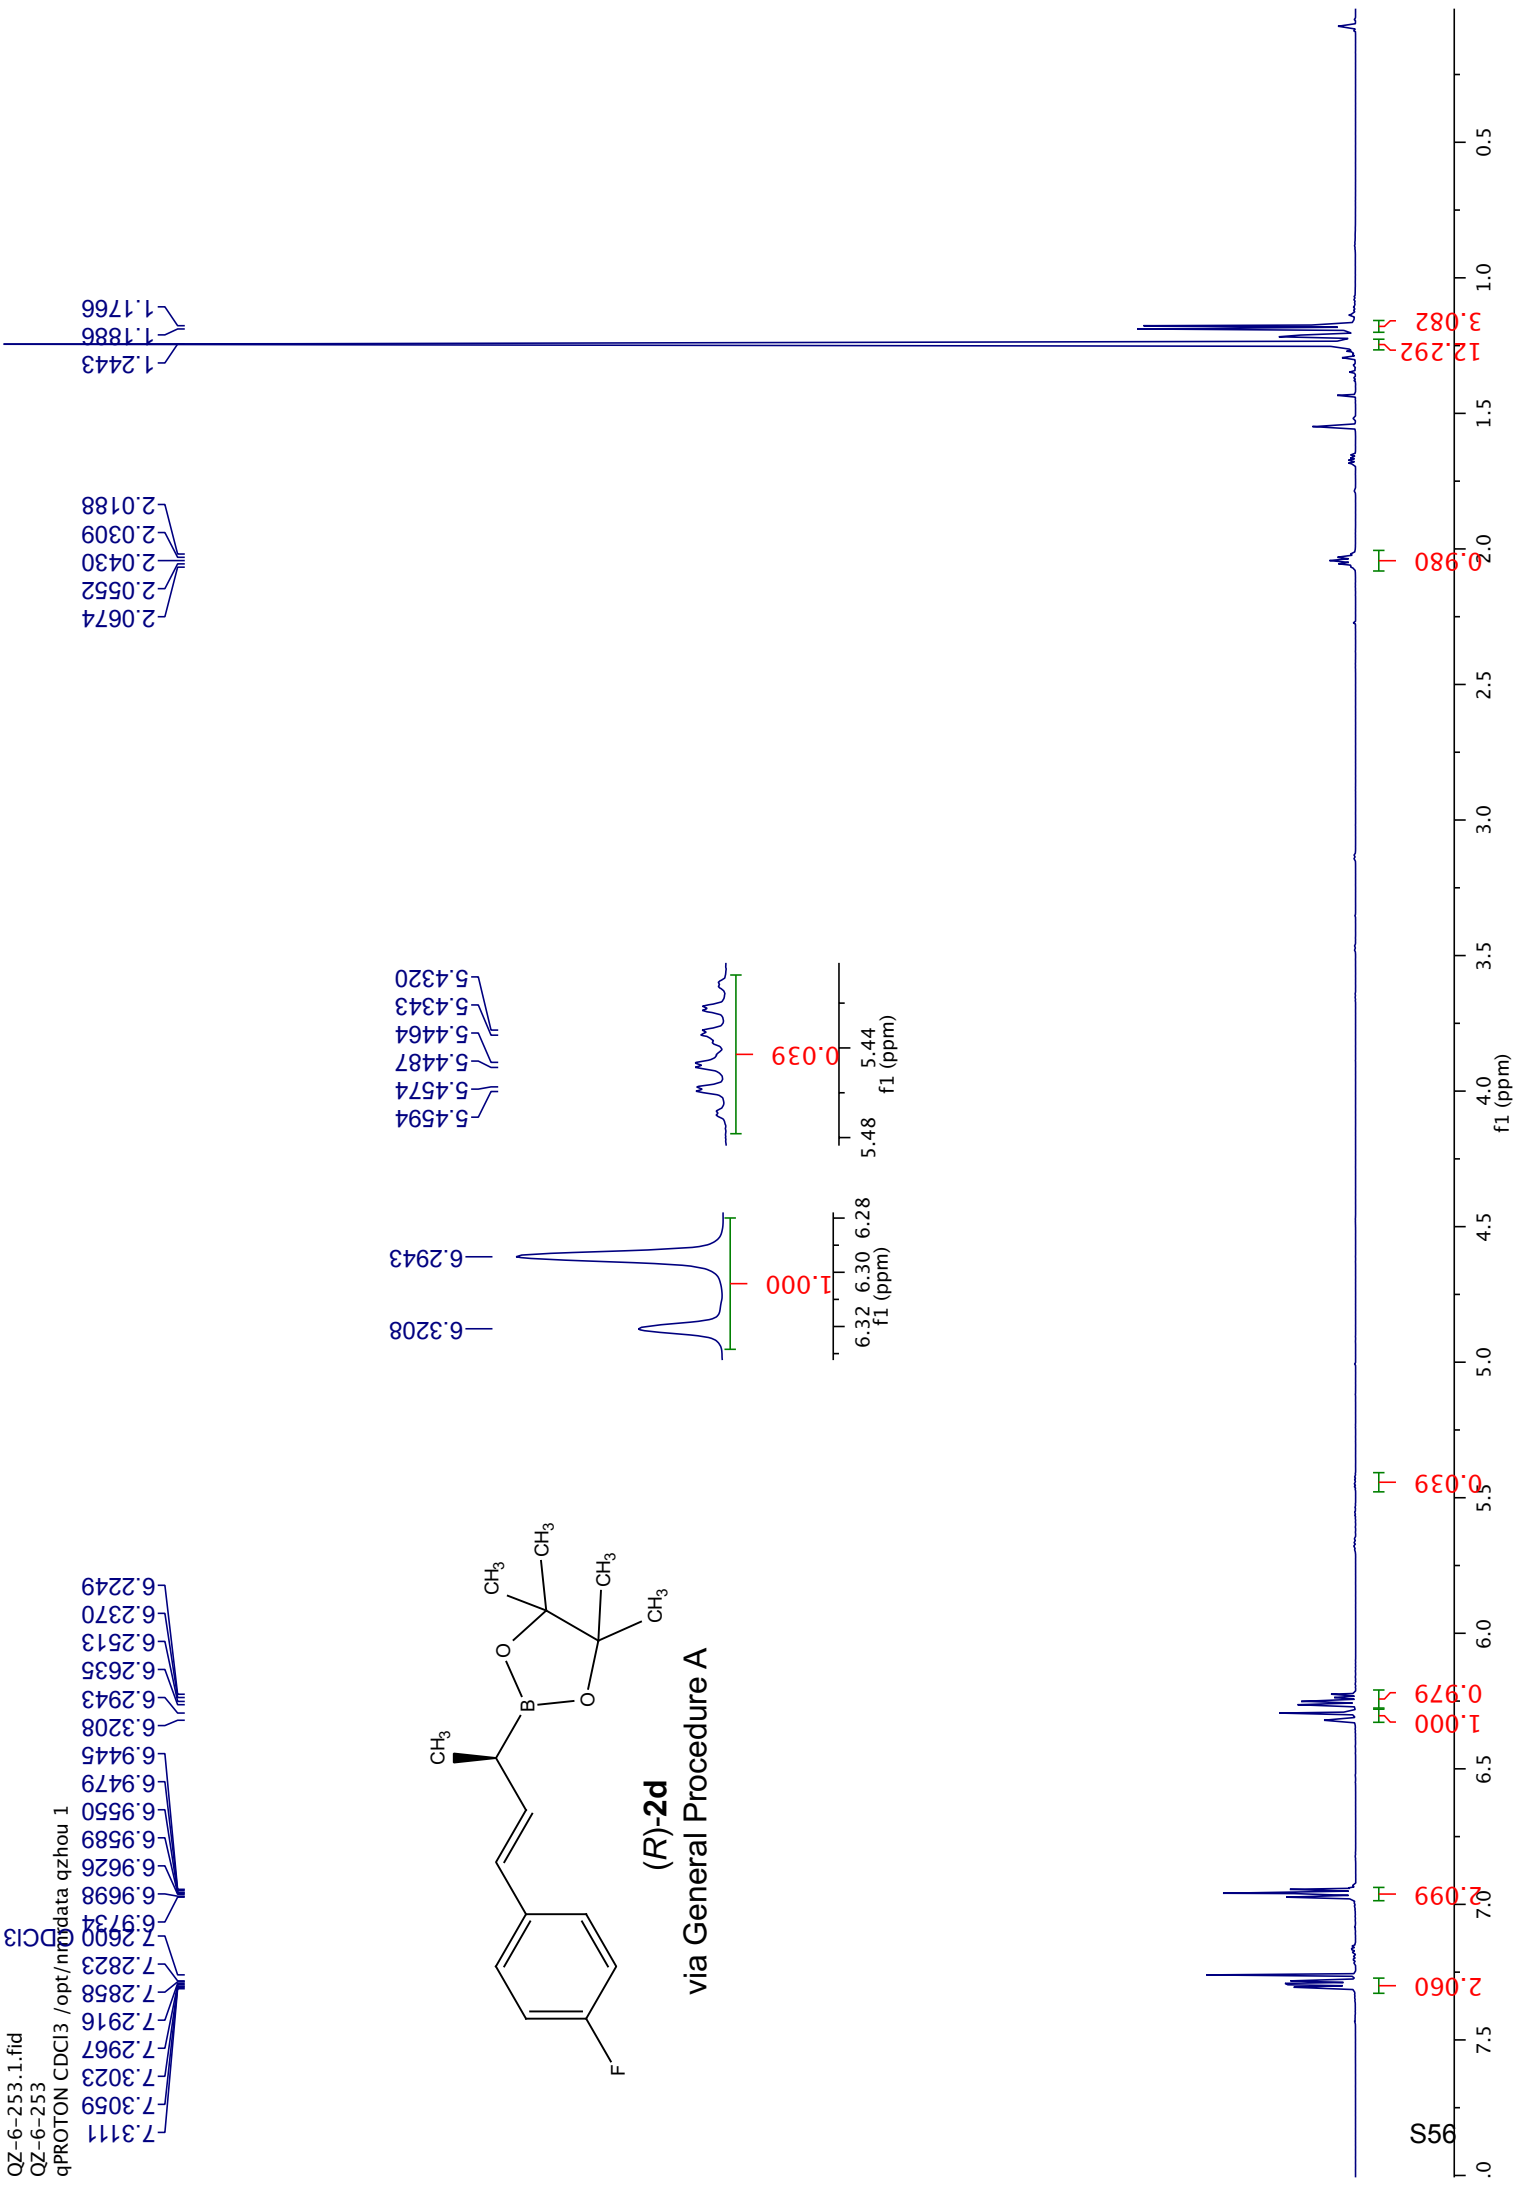



QZ-6-253.2.fid  
QZ-6-253  
C13CPD256 CDCl3 /opt/nmrdata qzhou 1

162.6613  
161.0380

134.5883  
134.5668  
133.1996  
133.1852  
127.4062  
127.3543  
126.5990

115.3868  
115.2456

83.4541

77.1600 CDCl3

24.8756  
24.8120

14.9889

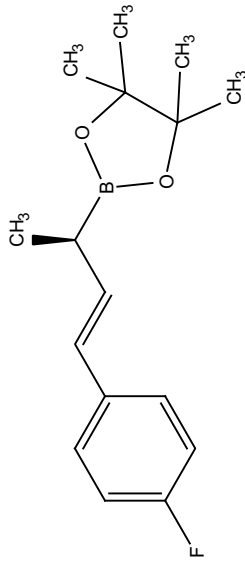

(R)-2d  
via General Procedure A

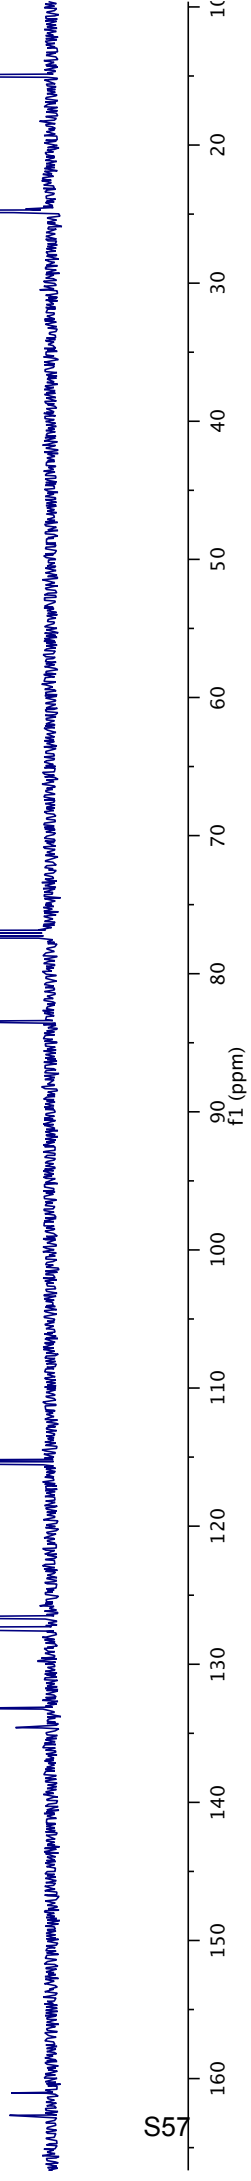

OZ-6-251-2-2  
OZ-6-251-2-2  
PROTON8 CDCl<sub>3</sub>

1.2443  
1.1887  
1.1765

2.0686  
2.0666  
2.0551  
2.0430  
2.0309  
2.0187

5.4105  
5.4126  
5.4213  
5.4234  
5.4319  
5.4342  
5.4378  
5.4431  
5.4465  
5.4486  
5.4573  
5.4594  
5.4679  
5.4700  
6.2248  
6.2369  
6.2512  
6.2634  
6.2941  
6.3207  
6.3207  
6.9446  
6.9479  
6.9552  
6.9589  
6.9626  
6.9733  
7.2602  
7.2622  
7.2822  
7.2859  
7.2915  
7.2966  
7.3028  
7.3058

5.4594  
5.4573  
5.4486  
5.4465  
5.4431  
5.4378  
5.4342  
5.4319  
5.4234  
5.4213

6.3207  
6.2941  
6.2634  
6.2512  
6.2369  
6.2248

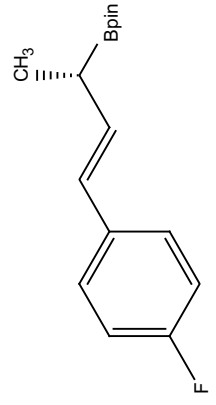

(S)-2d  
via General Procedure B

5.48 5.46 5.44 5.42 5.40  
f1 (ppm)

6.30 6.25  
f1 (ppm)

11.970  
3.091

1.000

1.000

1.005

0.153

0.159

1.000

1.005

2.311

2.042

855

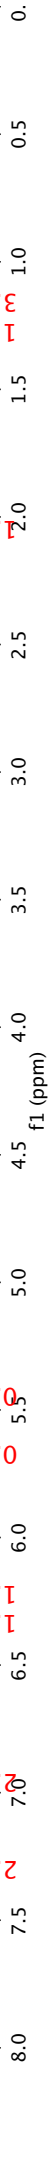

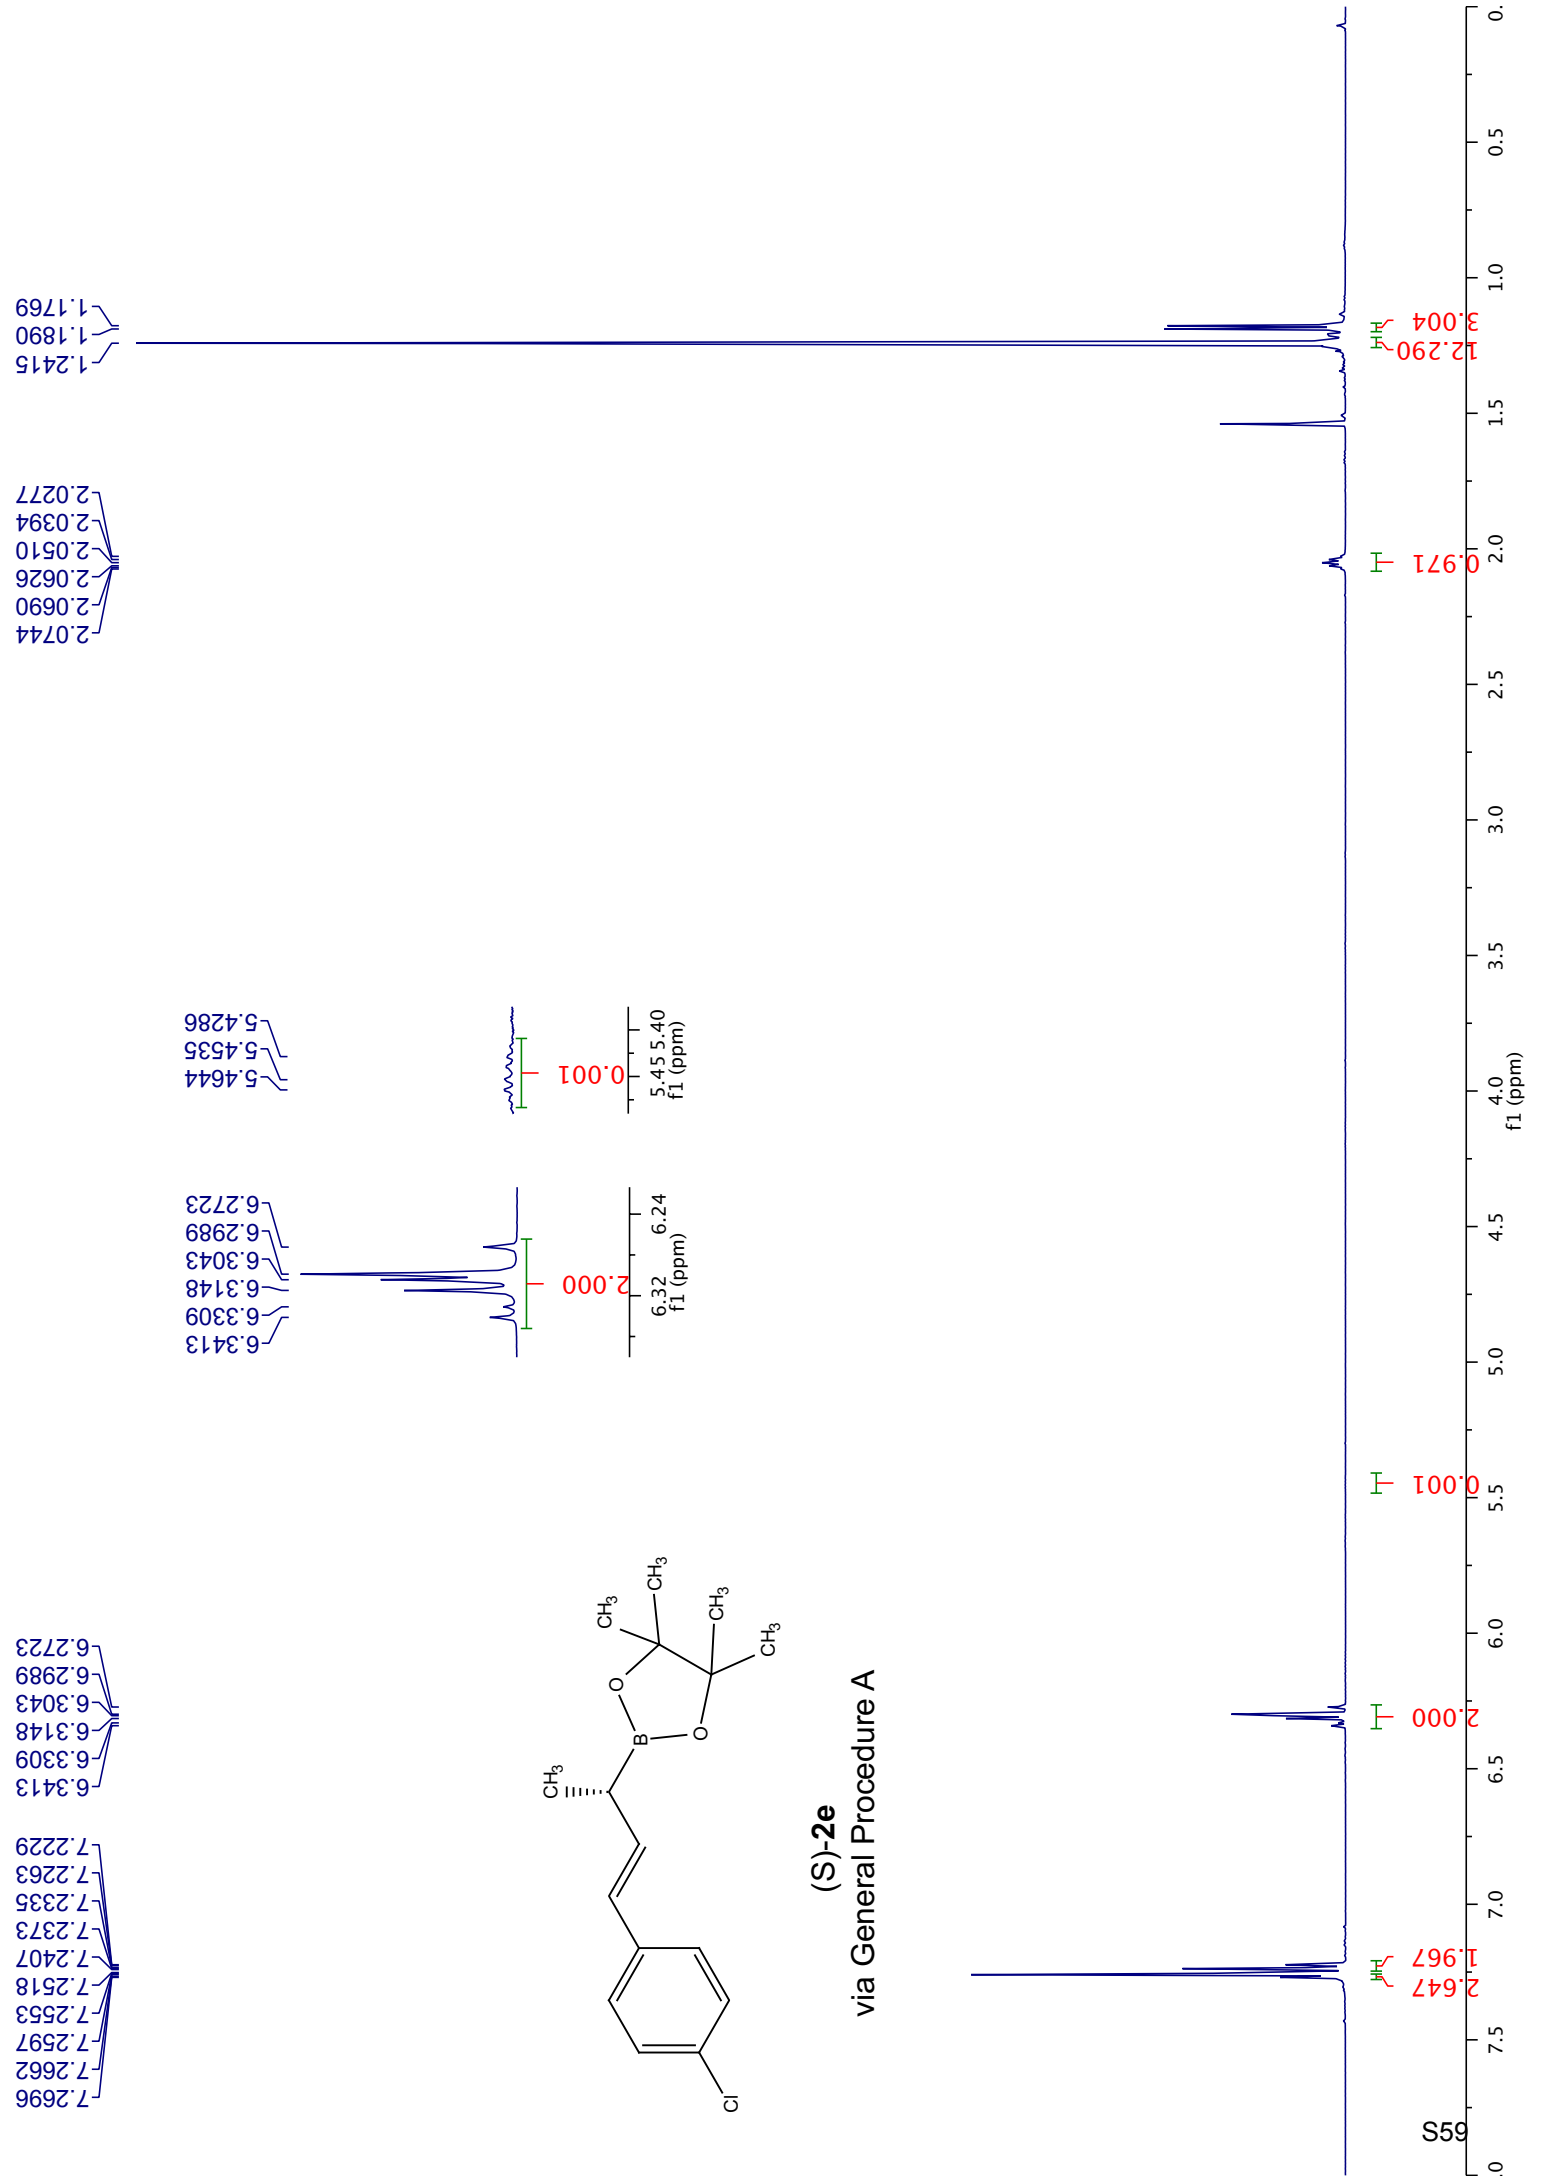

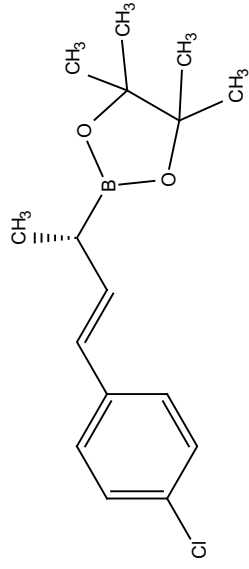

(S)-2e

via General Procedure A

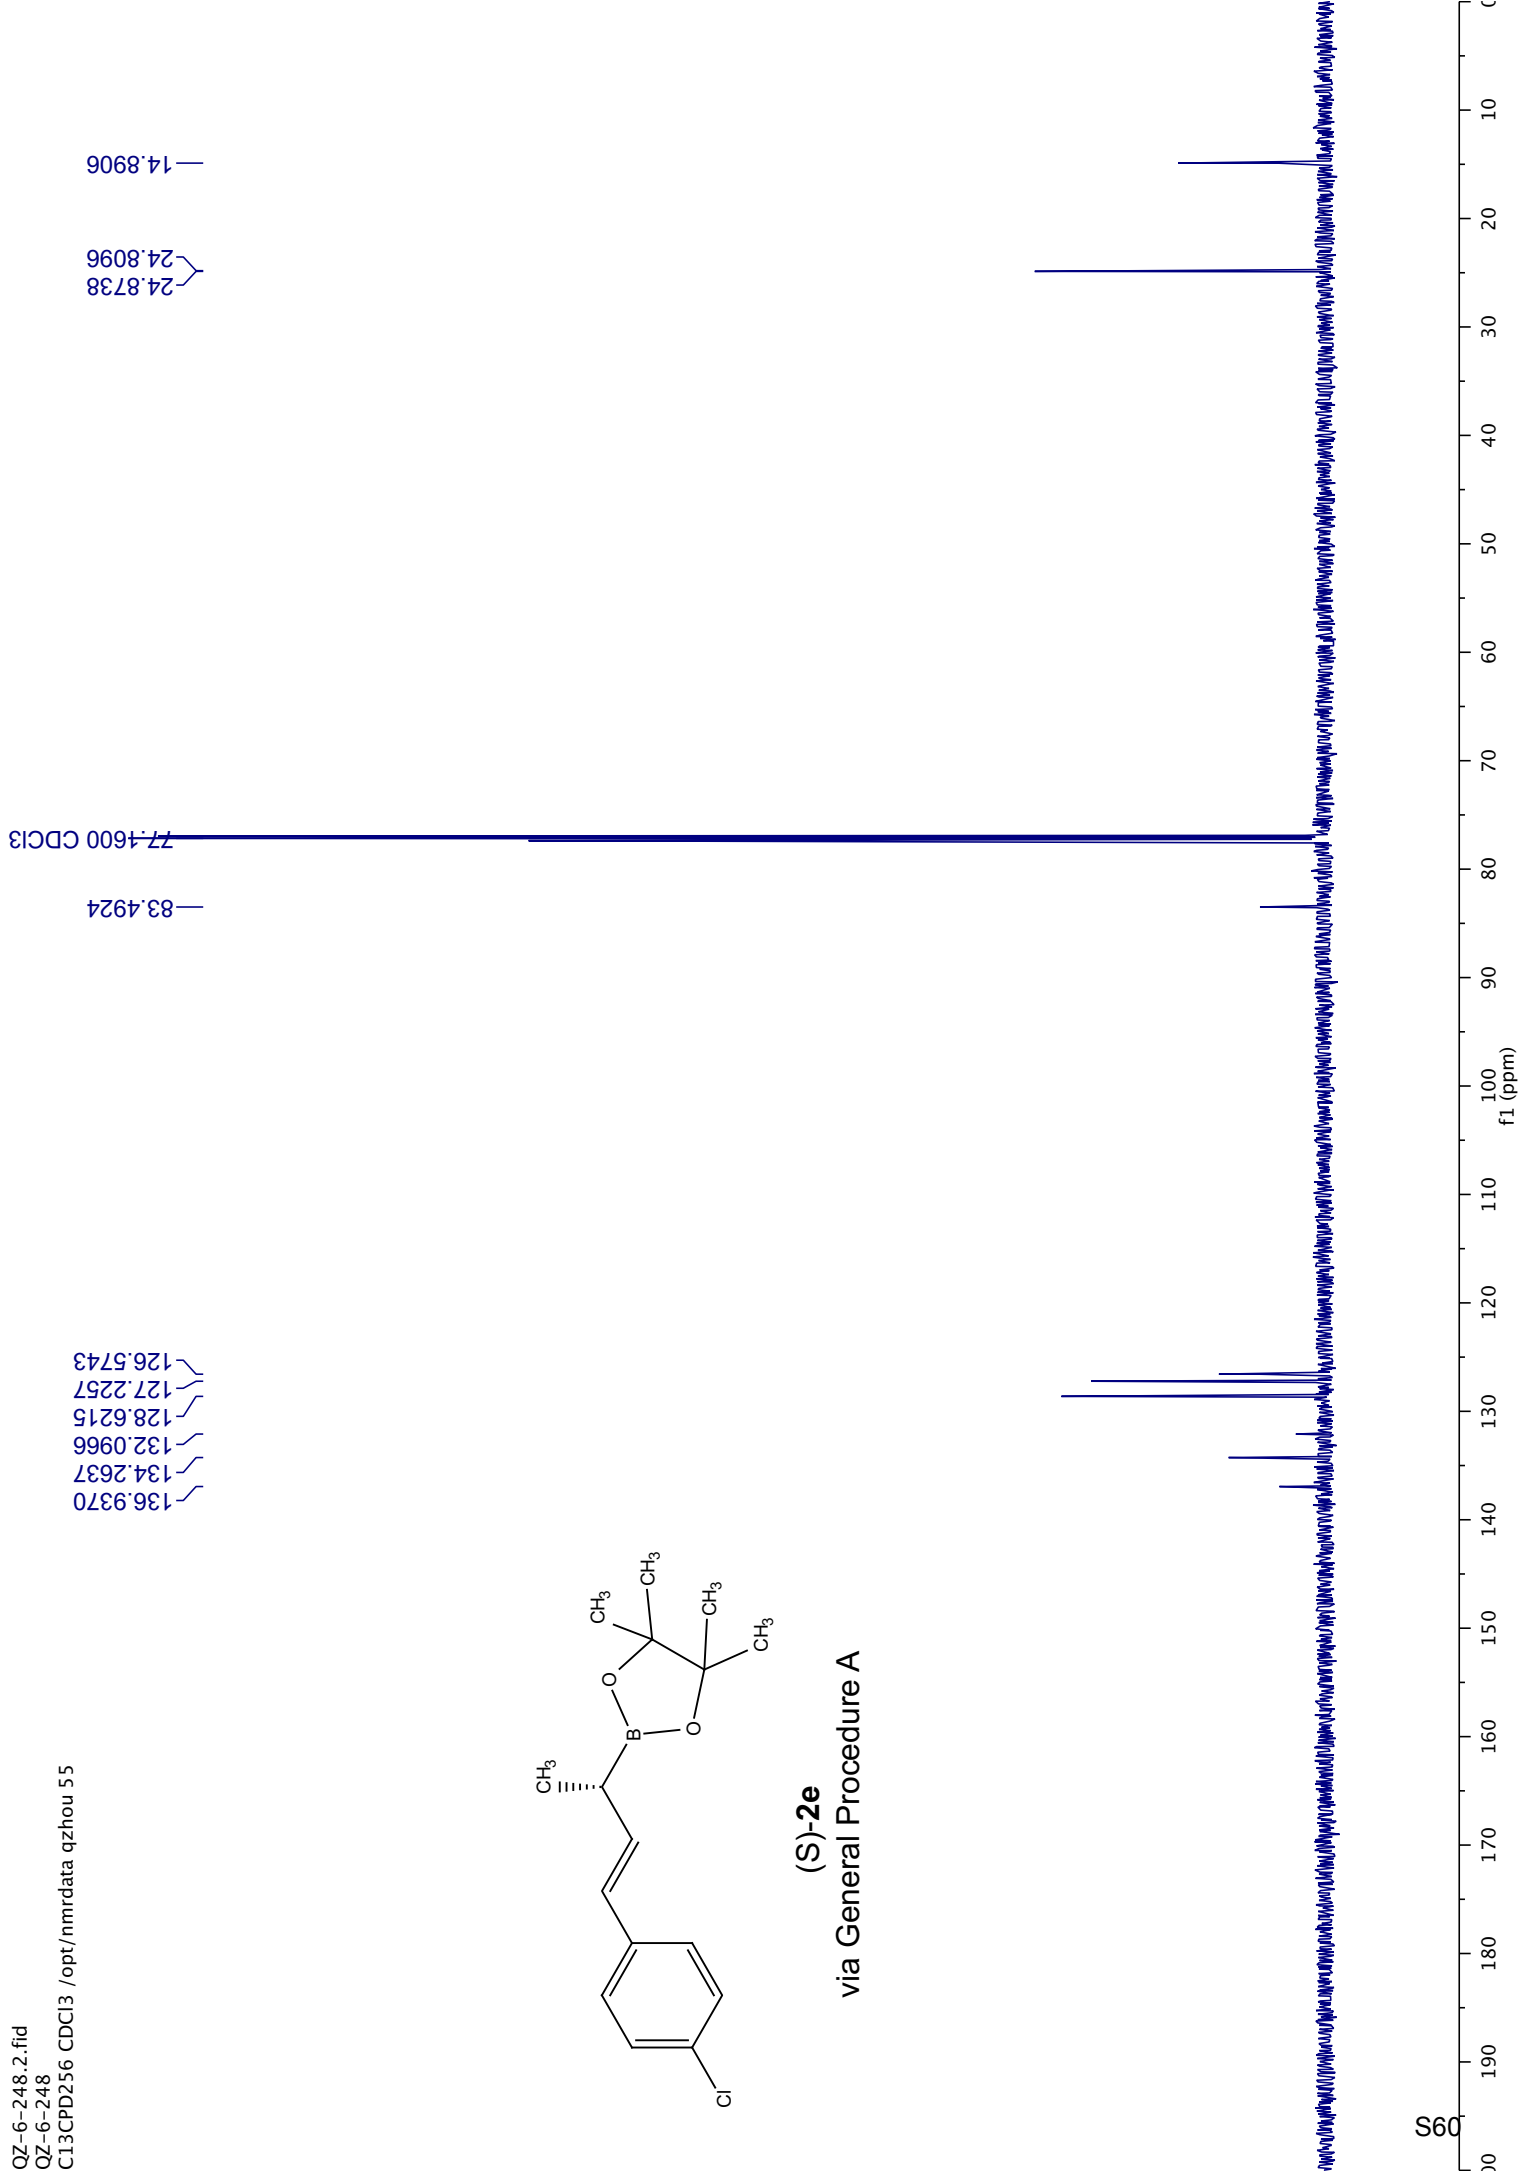

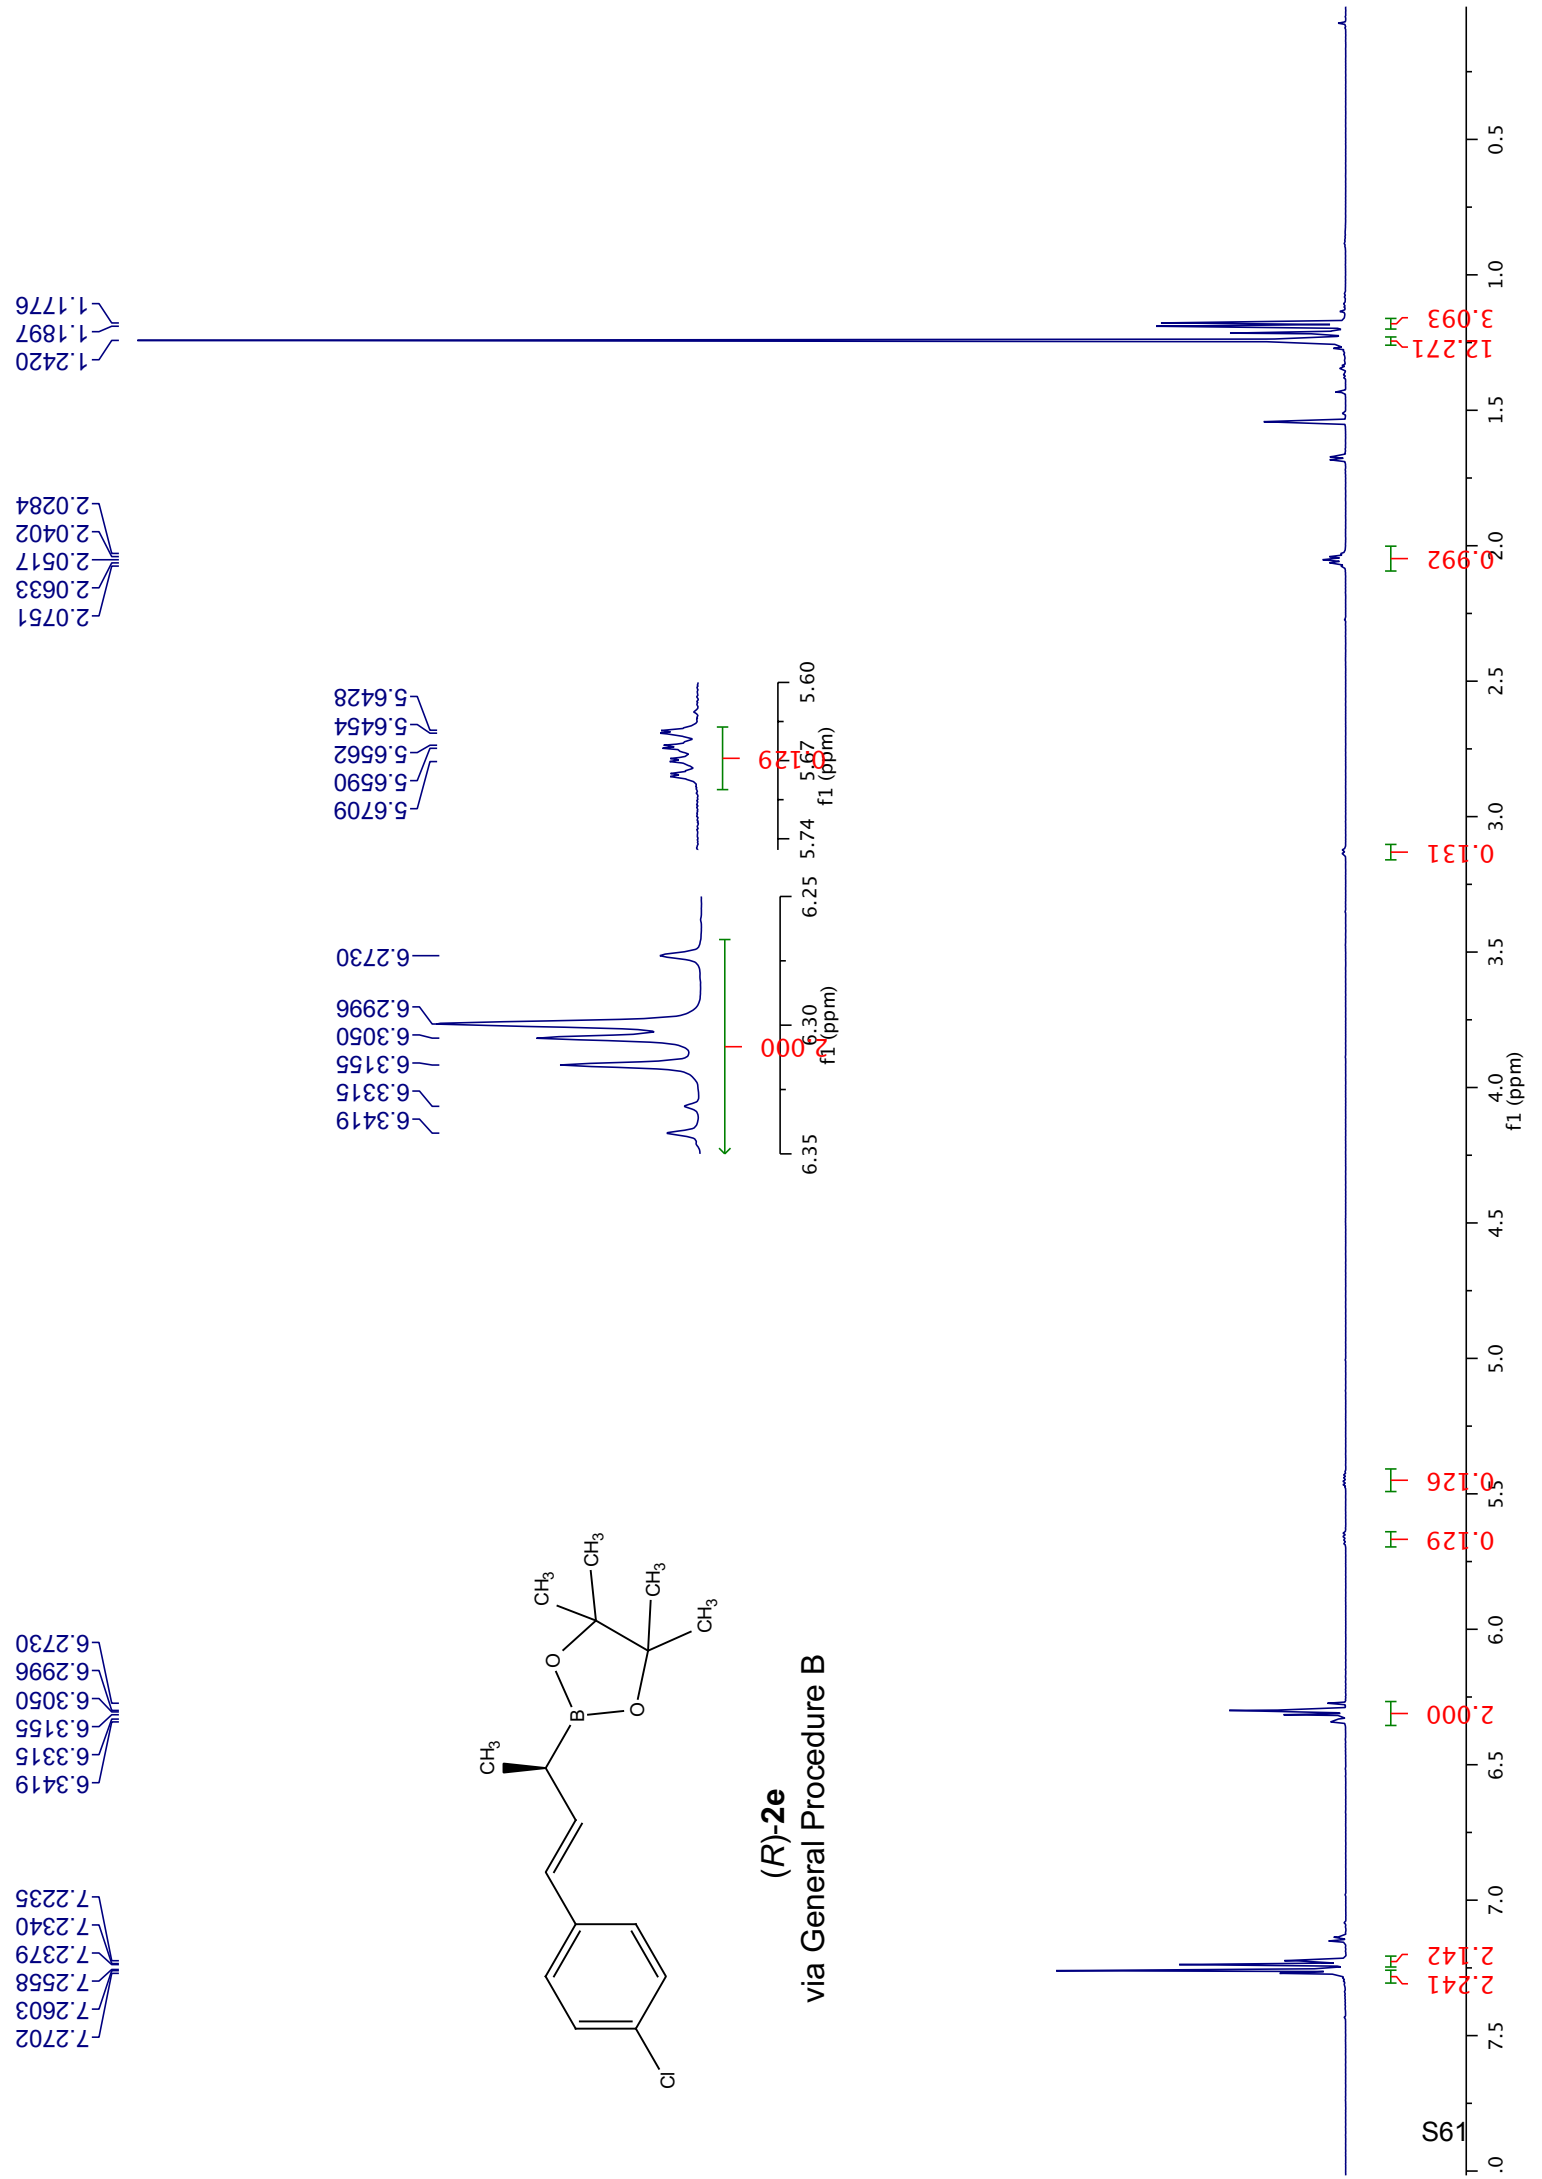

QZ-6-226-2  
QZ-6-226-2  
PROCION8 CDCl3 /opt/nmrdata qzzhou 11

7.260  
7.204  
7.191  
7.178  
6.951  
6.938  
6.895  
6.892  
6.889  
6.739  
6.734  
6.725  
6.721  
6.366  
6.356  
6.339  
6.329  
6.326  
6.300

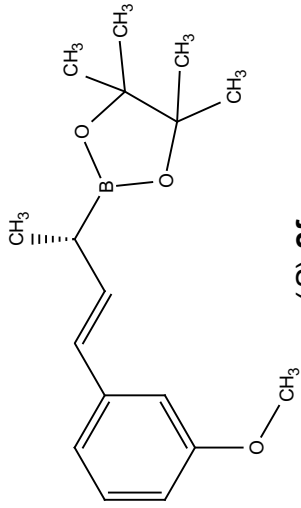

(S)-2f

via General Procedure A

3.809

2.082  
2.070  
2.059  
2.047  
2.036

1.243  
1.196  
1.184

6.790  
6.787  
6.784

6.895  
6.892  
6.889

6.79 6.78  
f1 (ppm)  
0.076

6.91 6.90 6.89 6.88  
f1 (ppm)  
0.991

1.852  
1.150

0.977

2.956

2.003

0.979  
0.076

0.982  
1.001

1.071

295

f1 (ppm)

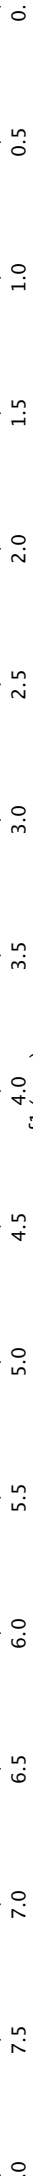

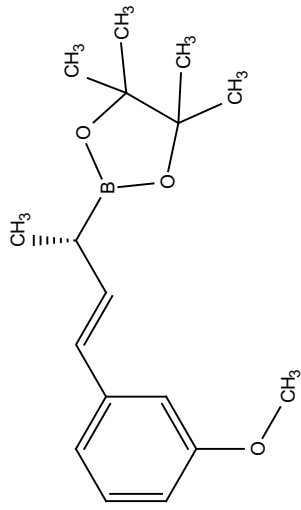

(S)-2f  
via General Procedure A

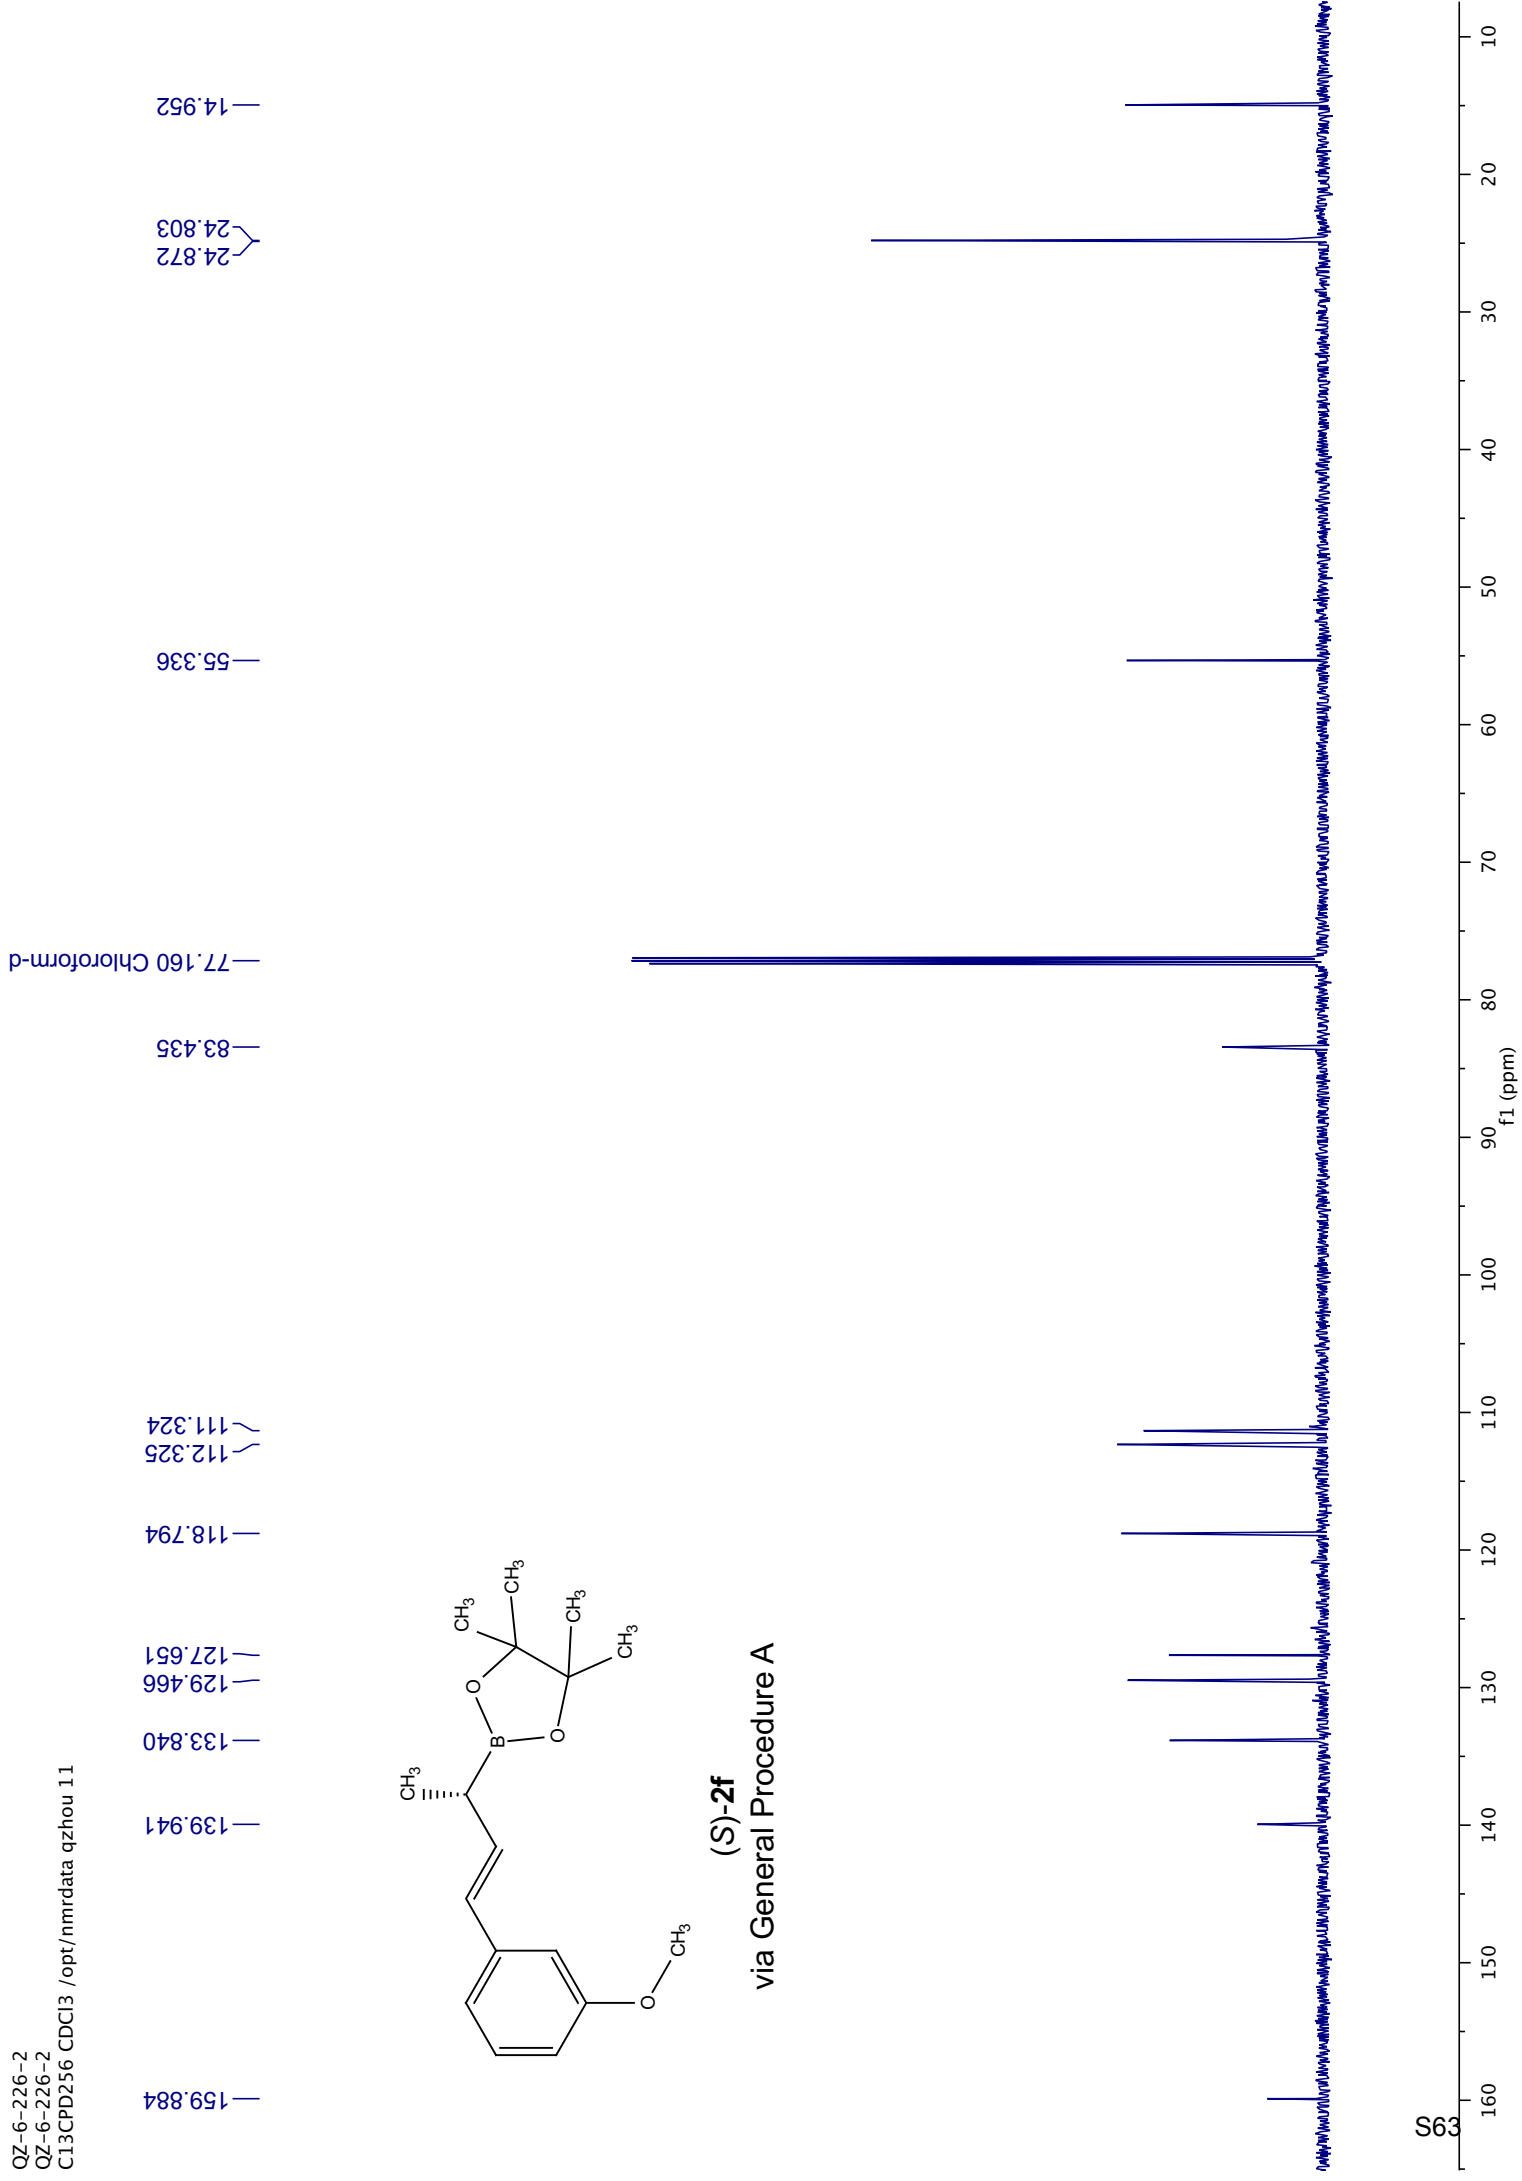

QZ-6-226-1  
QZ-6-226-1  
qPROTON CDCl<sub>3</sub>

/opt/nmrdata qzhou 10  
7.260 Chloroform-d

7.260  
7.203  
7.190  
7.177  
6.950  
6.938  
6.895  
6.891  
6.889  
6.818  
6.806  
6.790  
6.786  
6.737  
6.734  
6.724  
6.720  
6.702  
6.698  
6.688  
6.684  
6.365  
6.355  
6.338  
6.328  
6.326  
6.299  
3.809  
2.081  
2.069  
2.058  
2.047  
2.035  
1.242  
1.195  
1.183

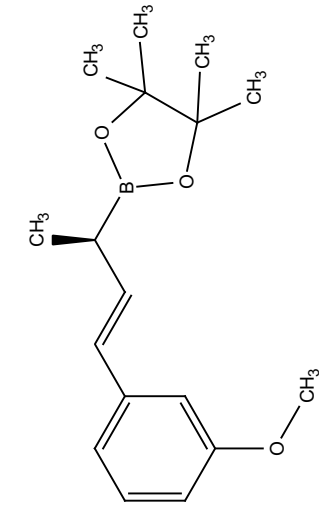

(R)-2f

via General Procedure B

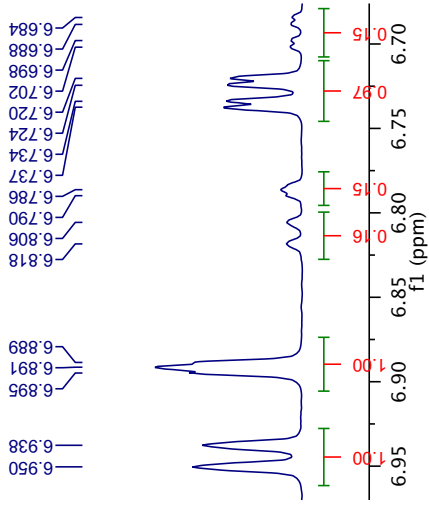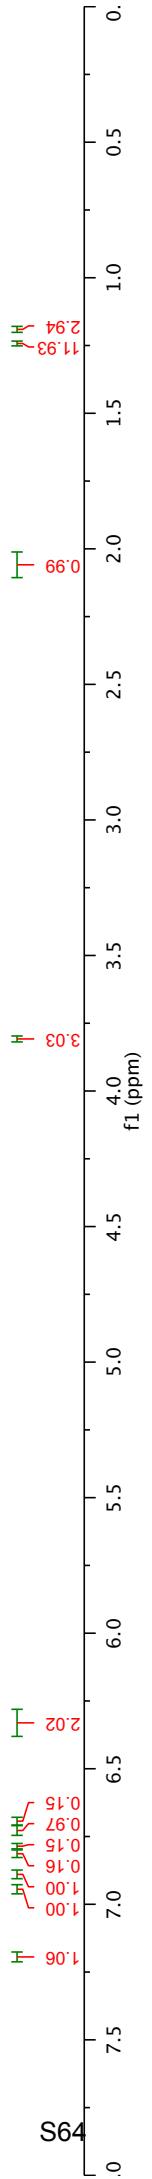



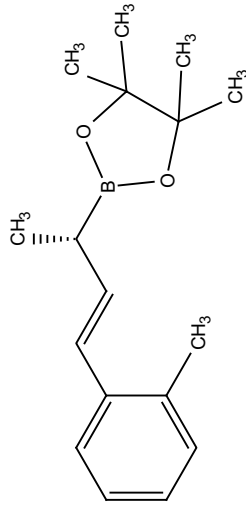

**(S)-2g**  
via General Procedure A

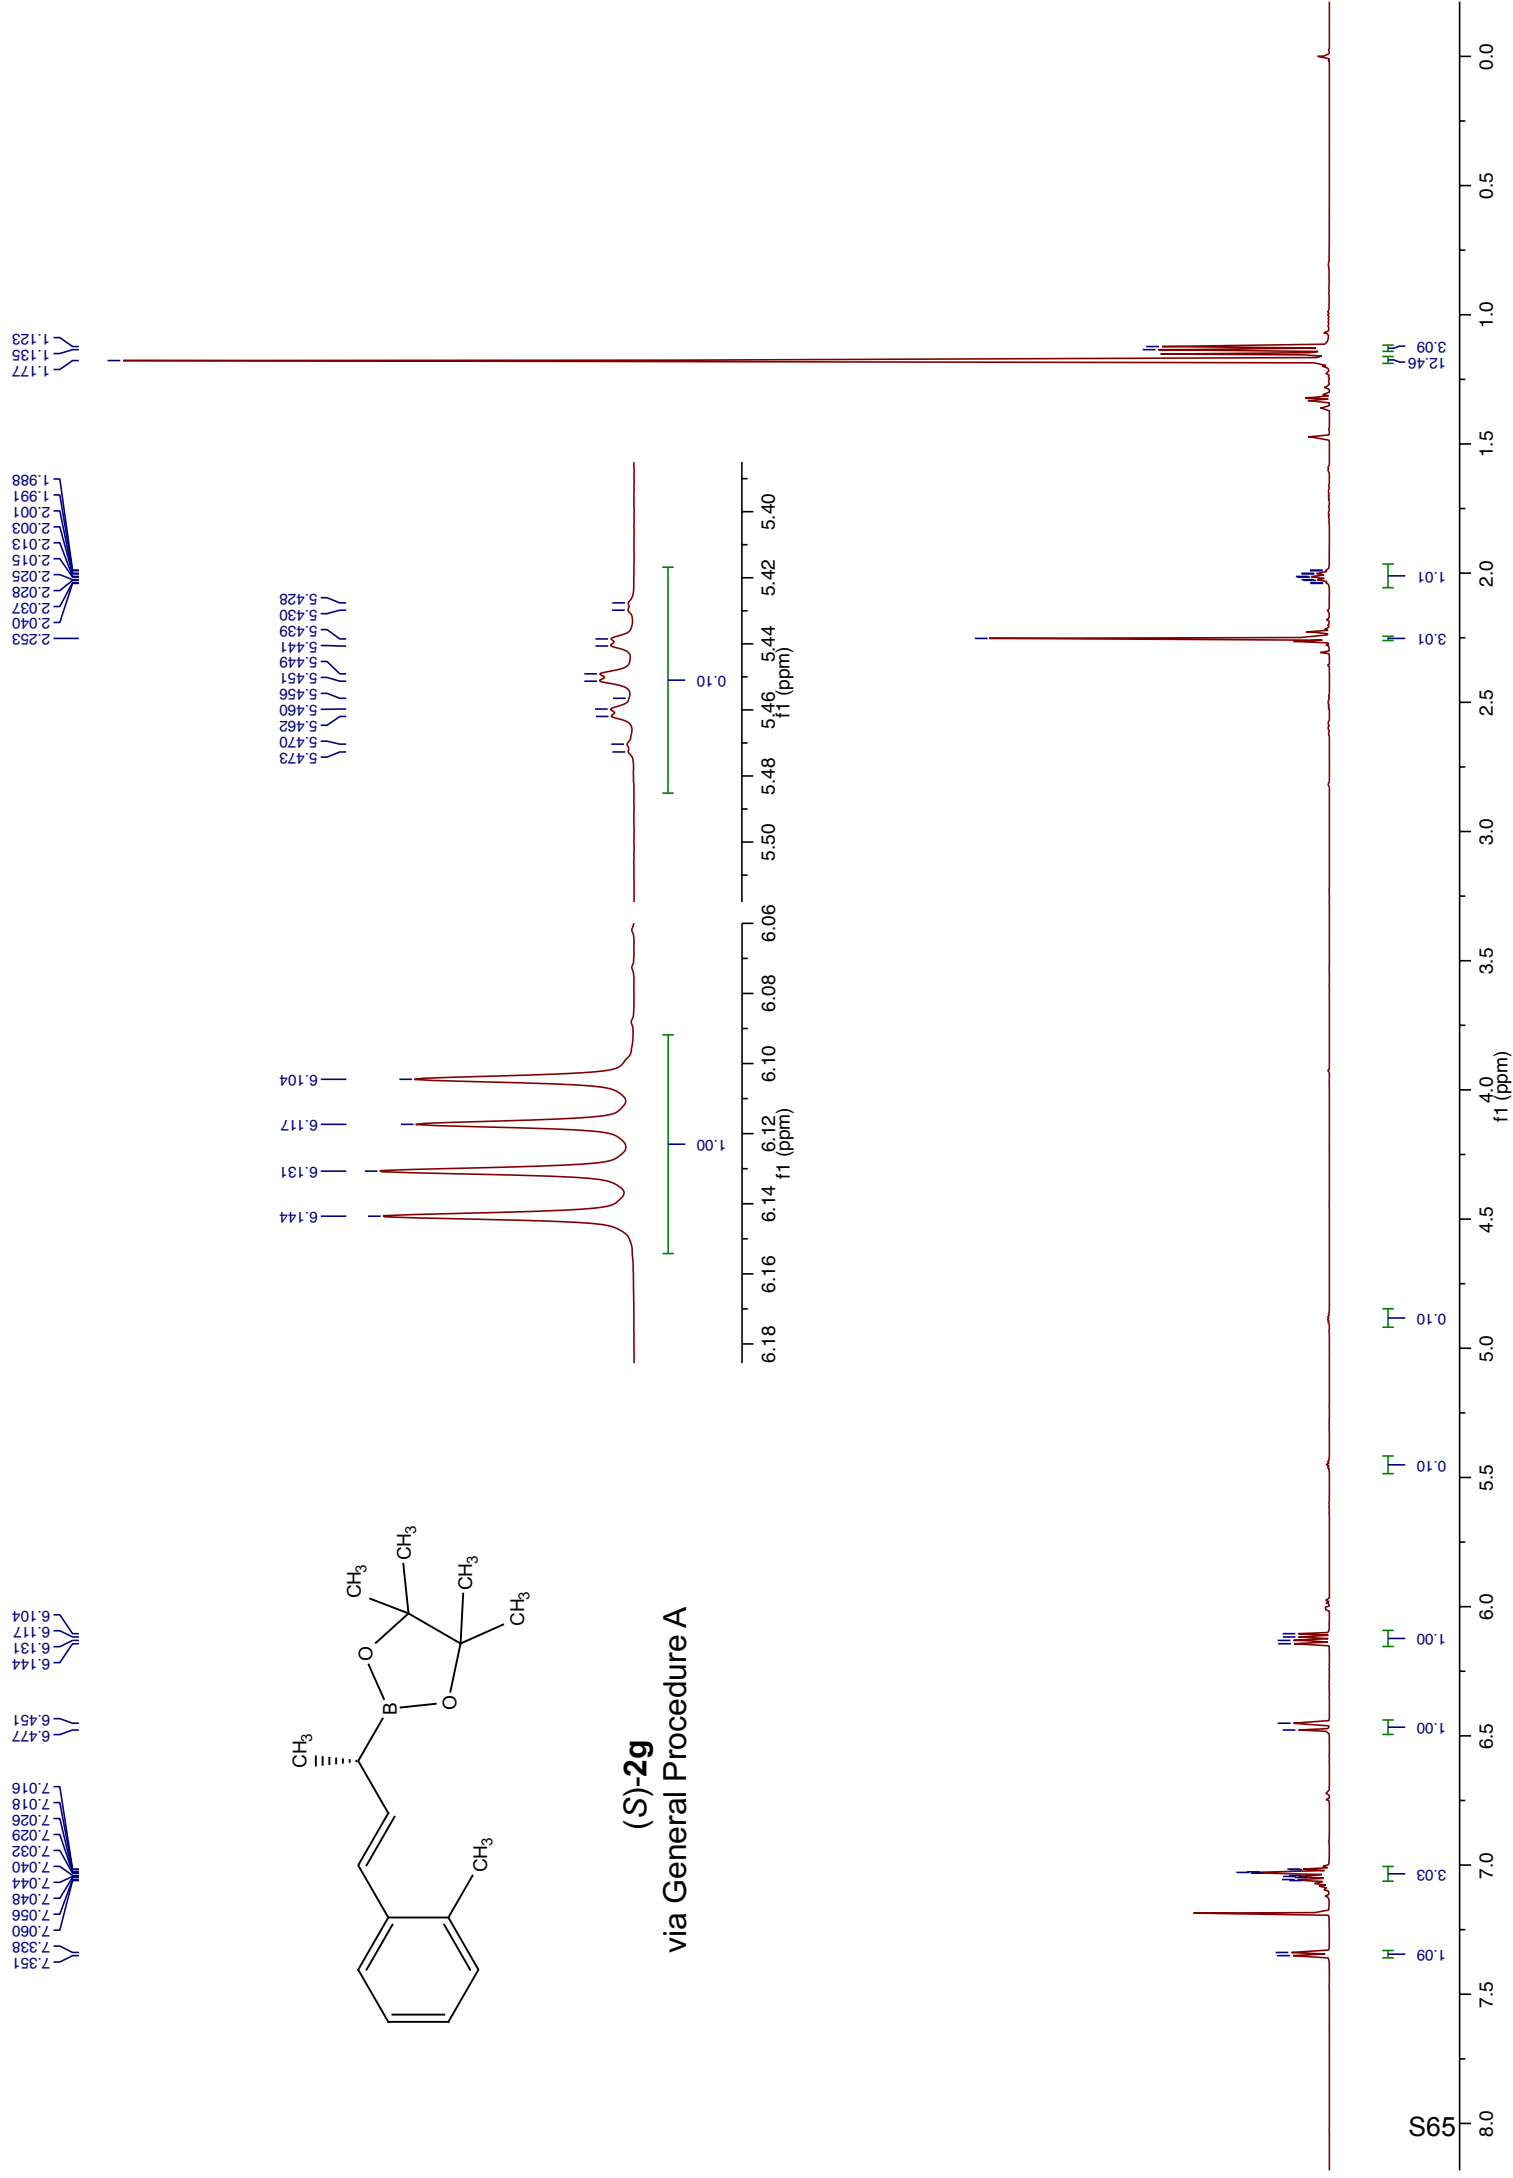

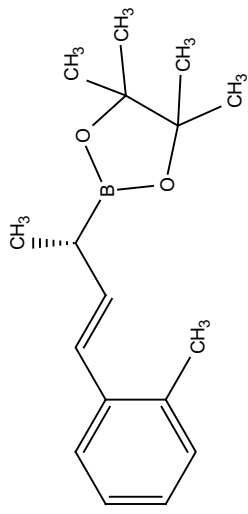

(S)-2g  
via General Procedure A

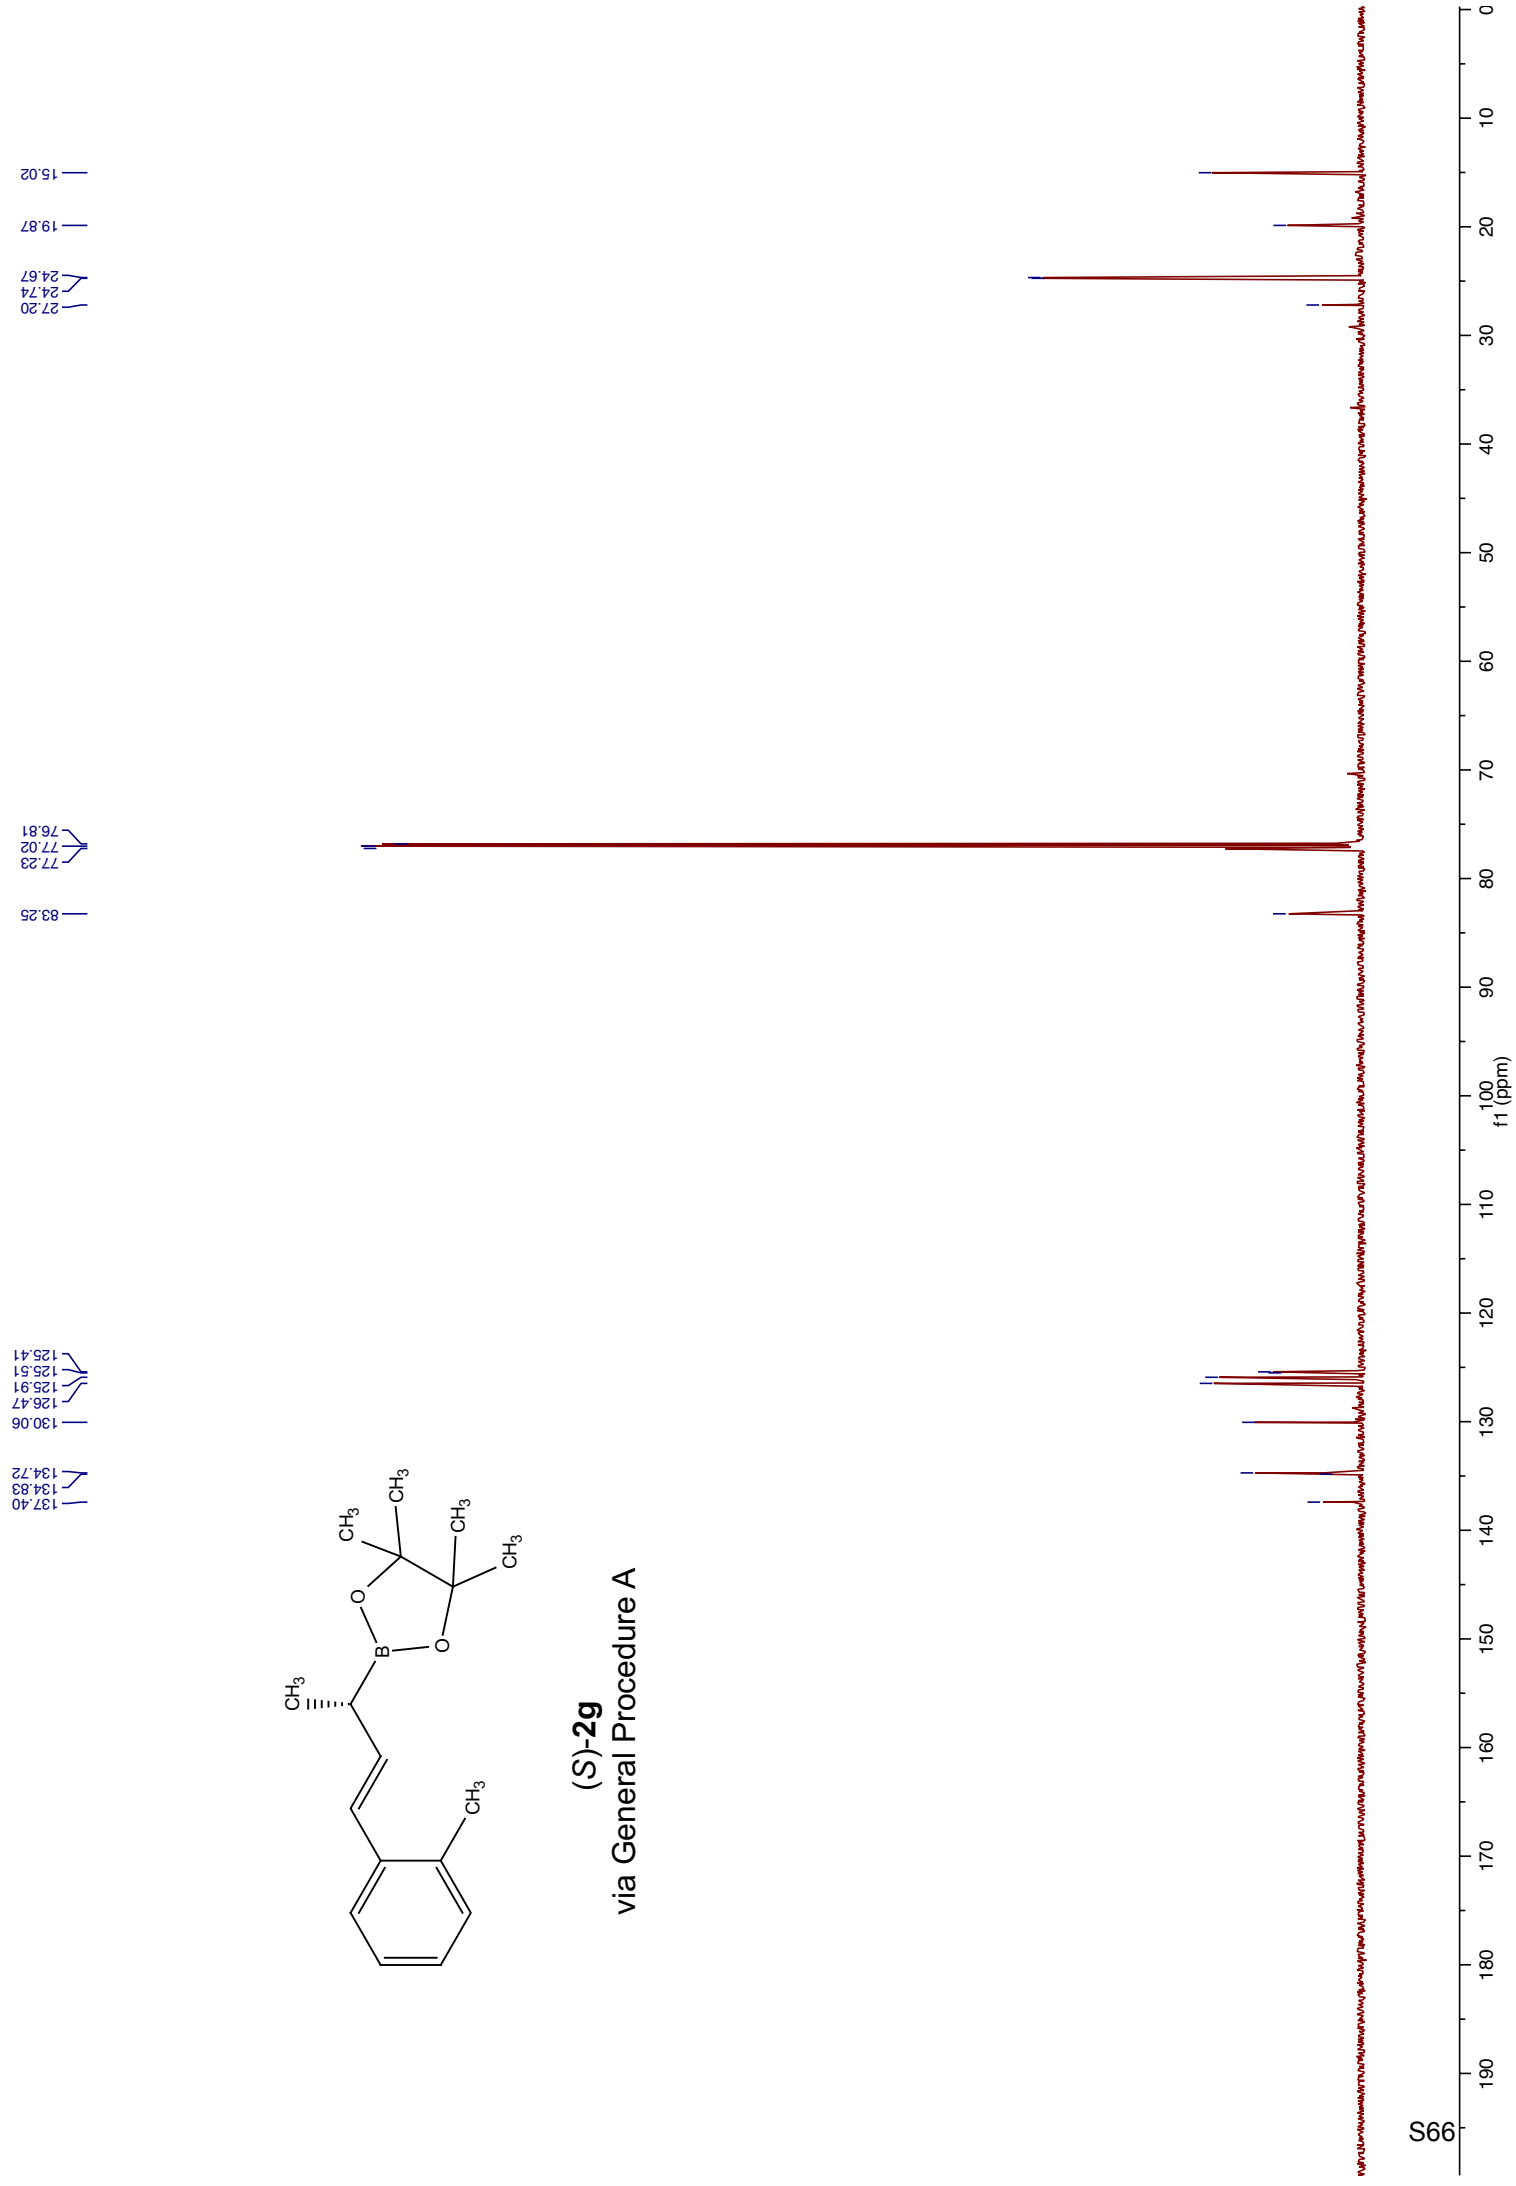

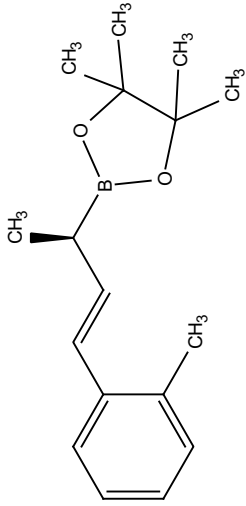

(R)-2g  
via General Procedure B

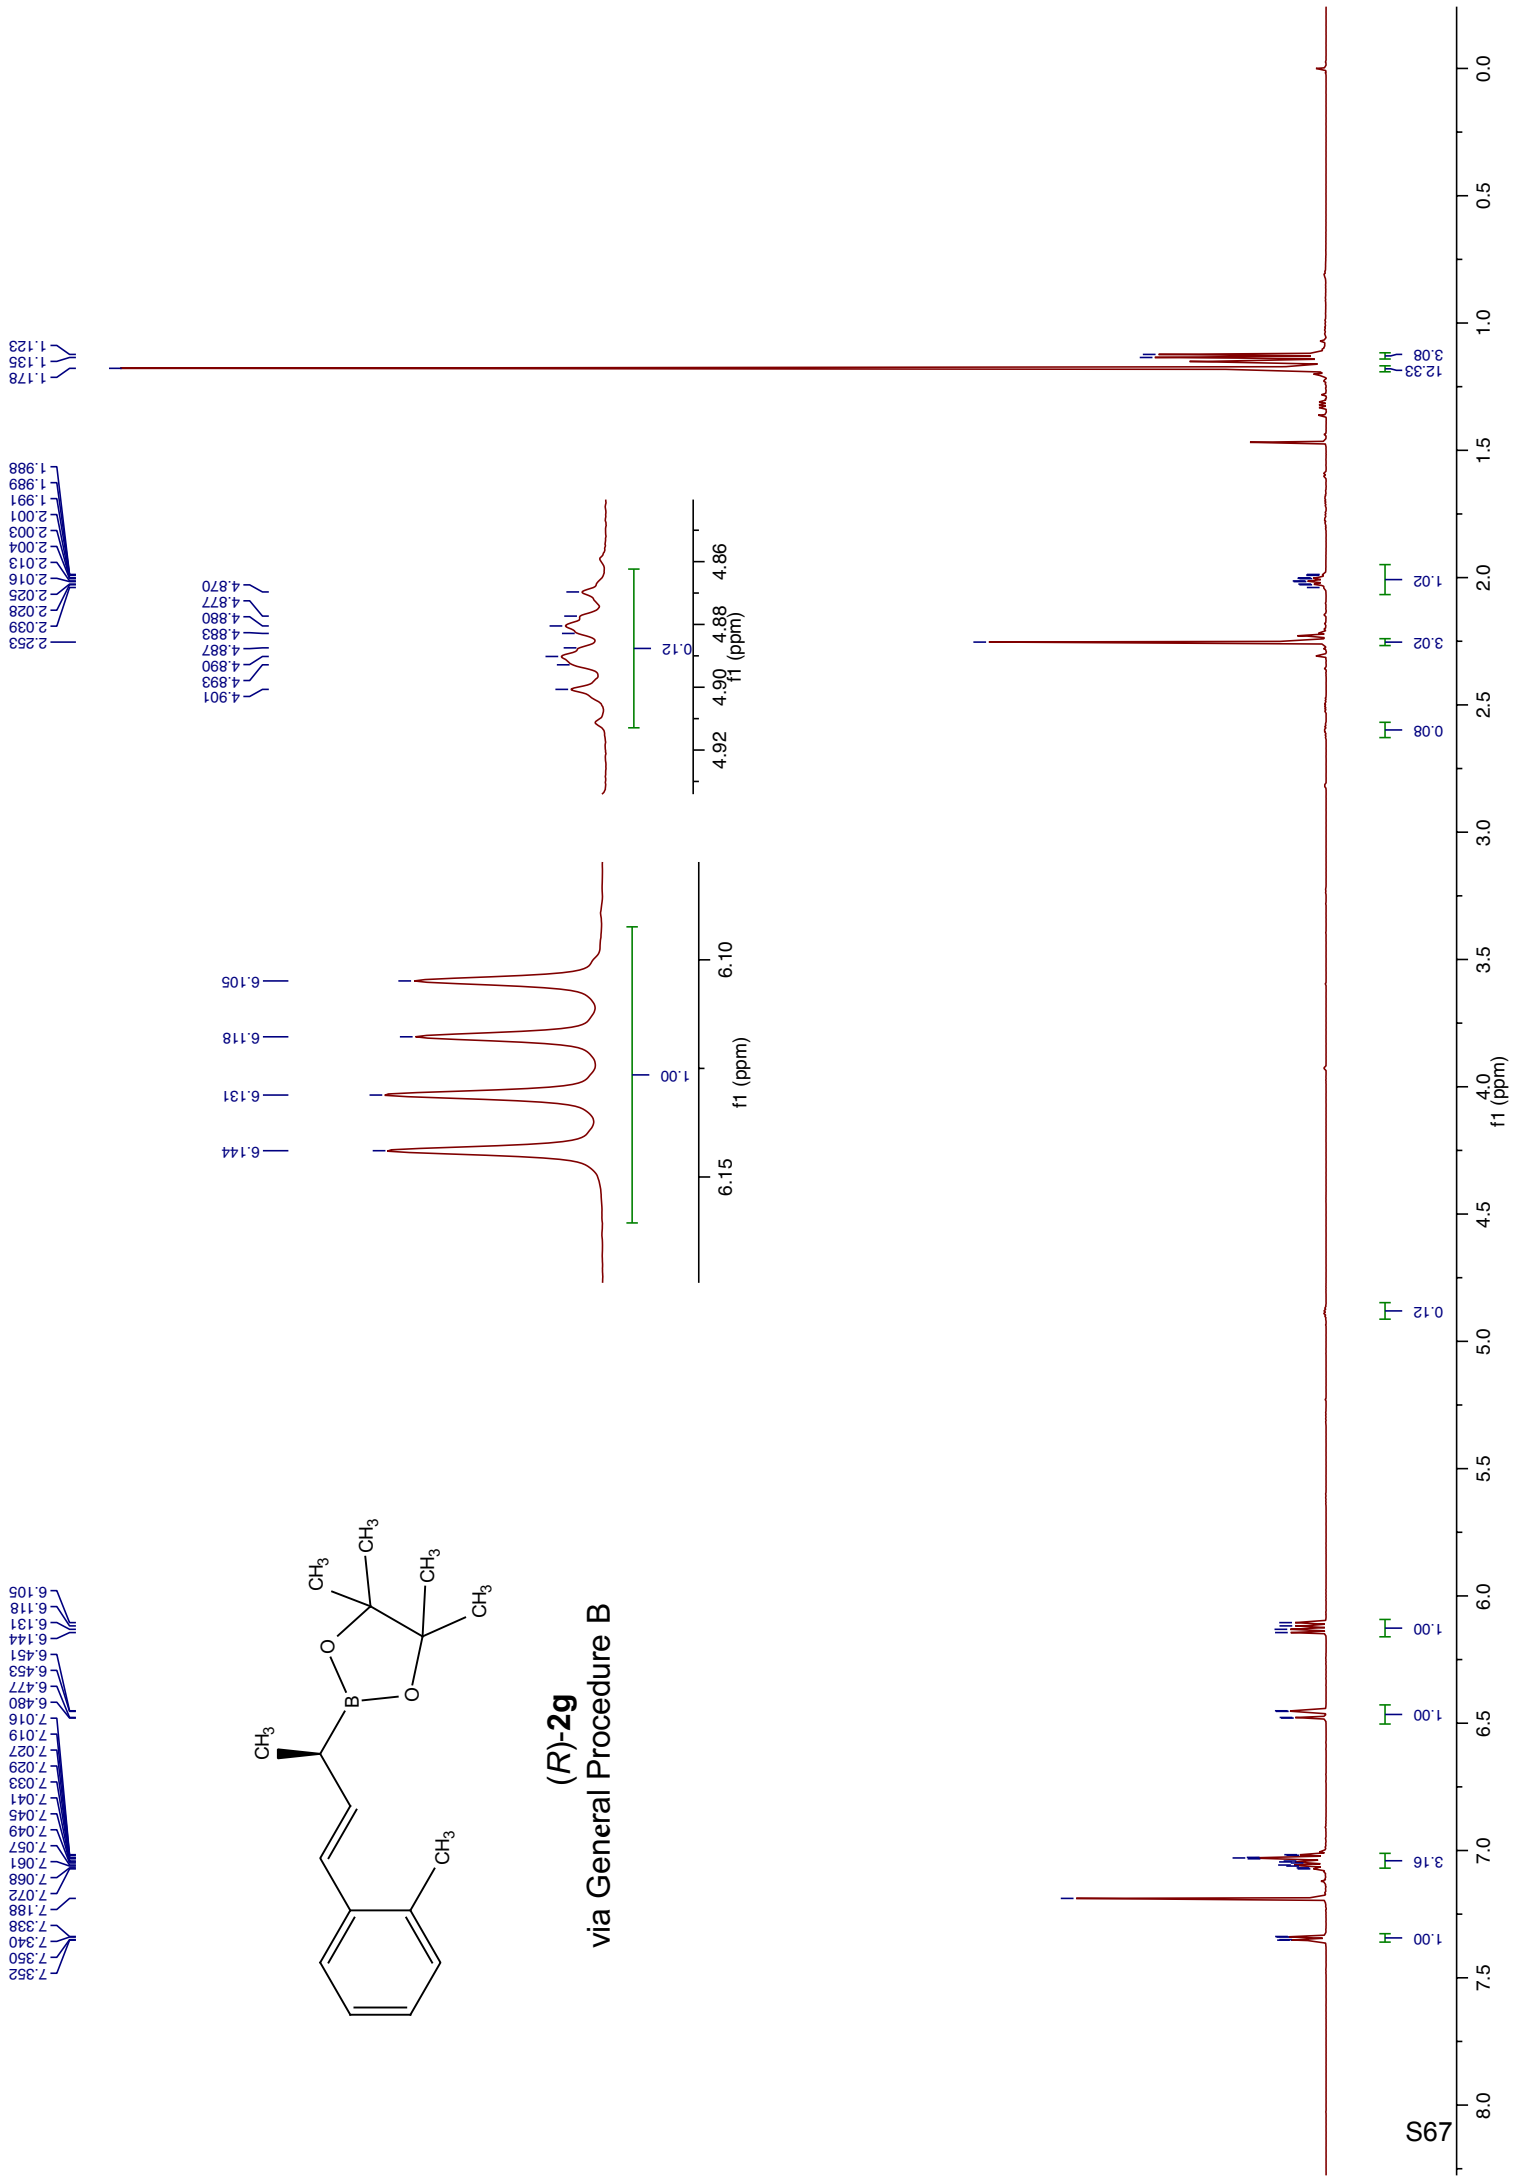

7.776  
7.761  
7.752  
7.737  
7.672  
7.603  
7.601  
7.589  
7.586  
7.428  
7.426  
7.415  
7.413  
7.402  
7.400  
7.389  
7.387  
7.260  
6.533  
6.507  
6.491  
6.479  
6.465  
6.453  
Chloroform-d

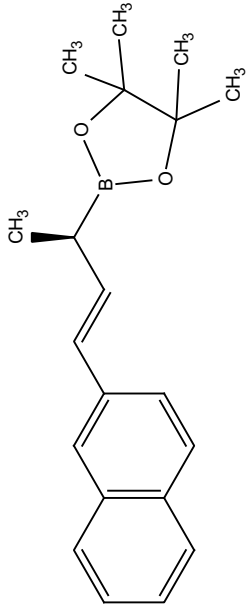

(R)-2h  
via General Procedure A

2.147  
2.135  
2.124  
2.112  
2.100  
1.257  
1.242  
1.230

5.5180  
5.4942

6.5331  
6.5065  
6.4910  
6.4794  
6.4645  
6.4529

6.55 6.50 6.45  
f1 (ppm)  
2.000

5.52 5.48  
f1 (ppm)  
0.012

2.020  
2.924

0.978

4.012

4.000

2.103  
1.030  
1.007  
1.160

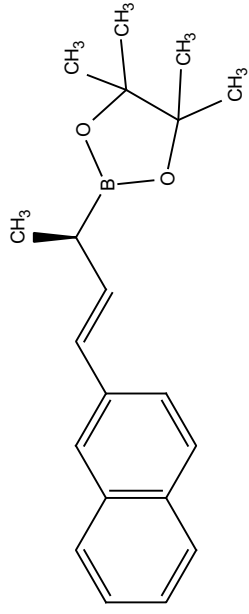

**(R)-2h**  
via General Procedure A

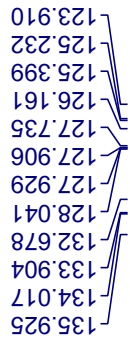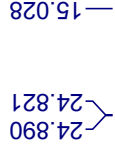

77.169 Chloroform-d

83.478

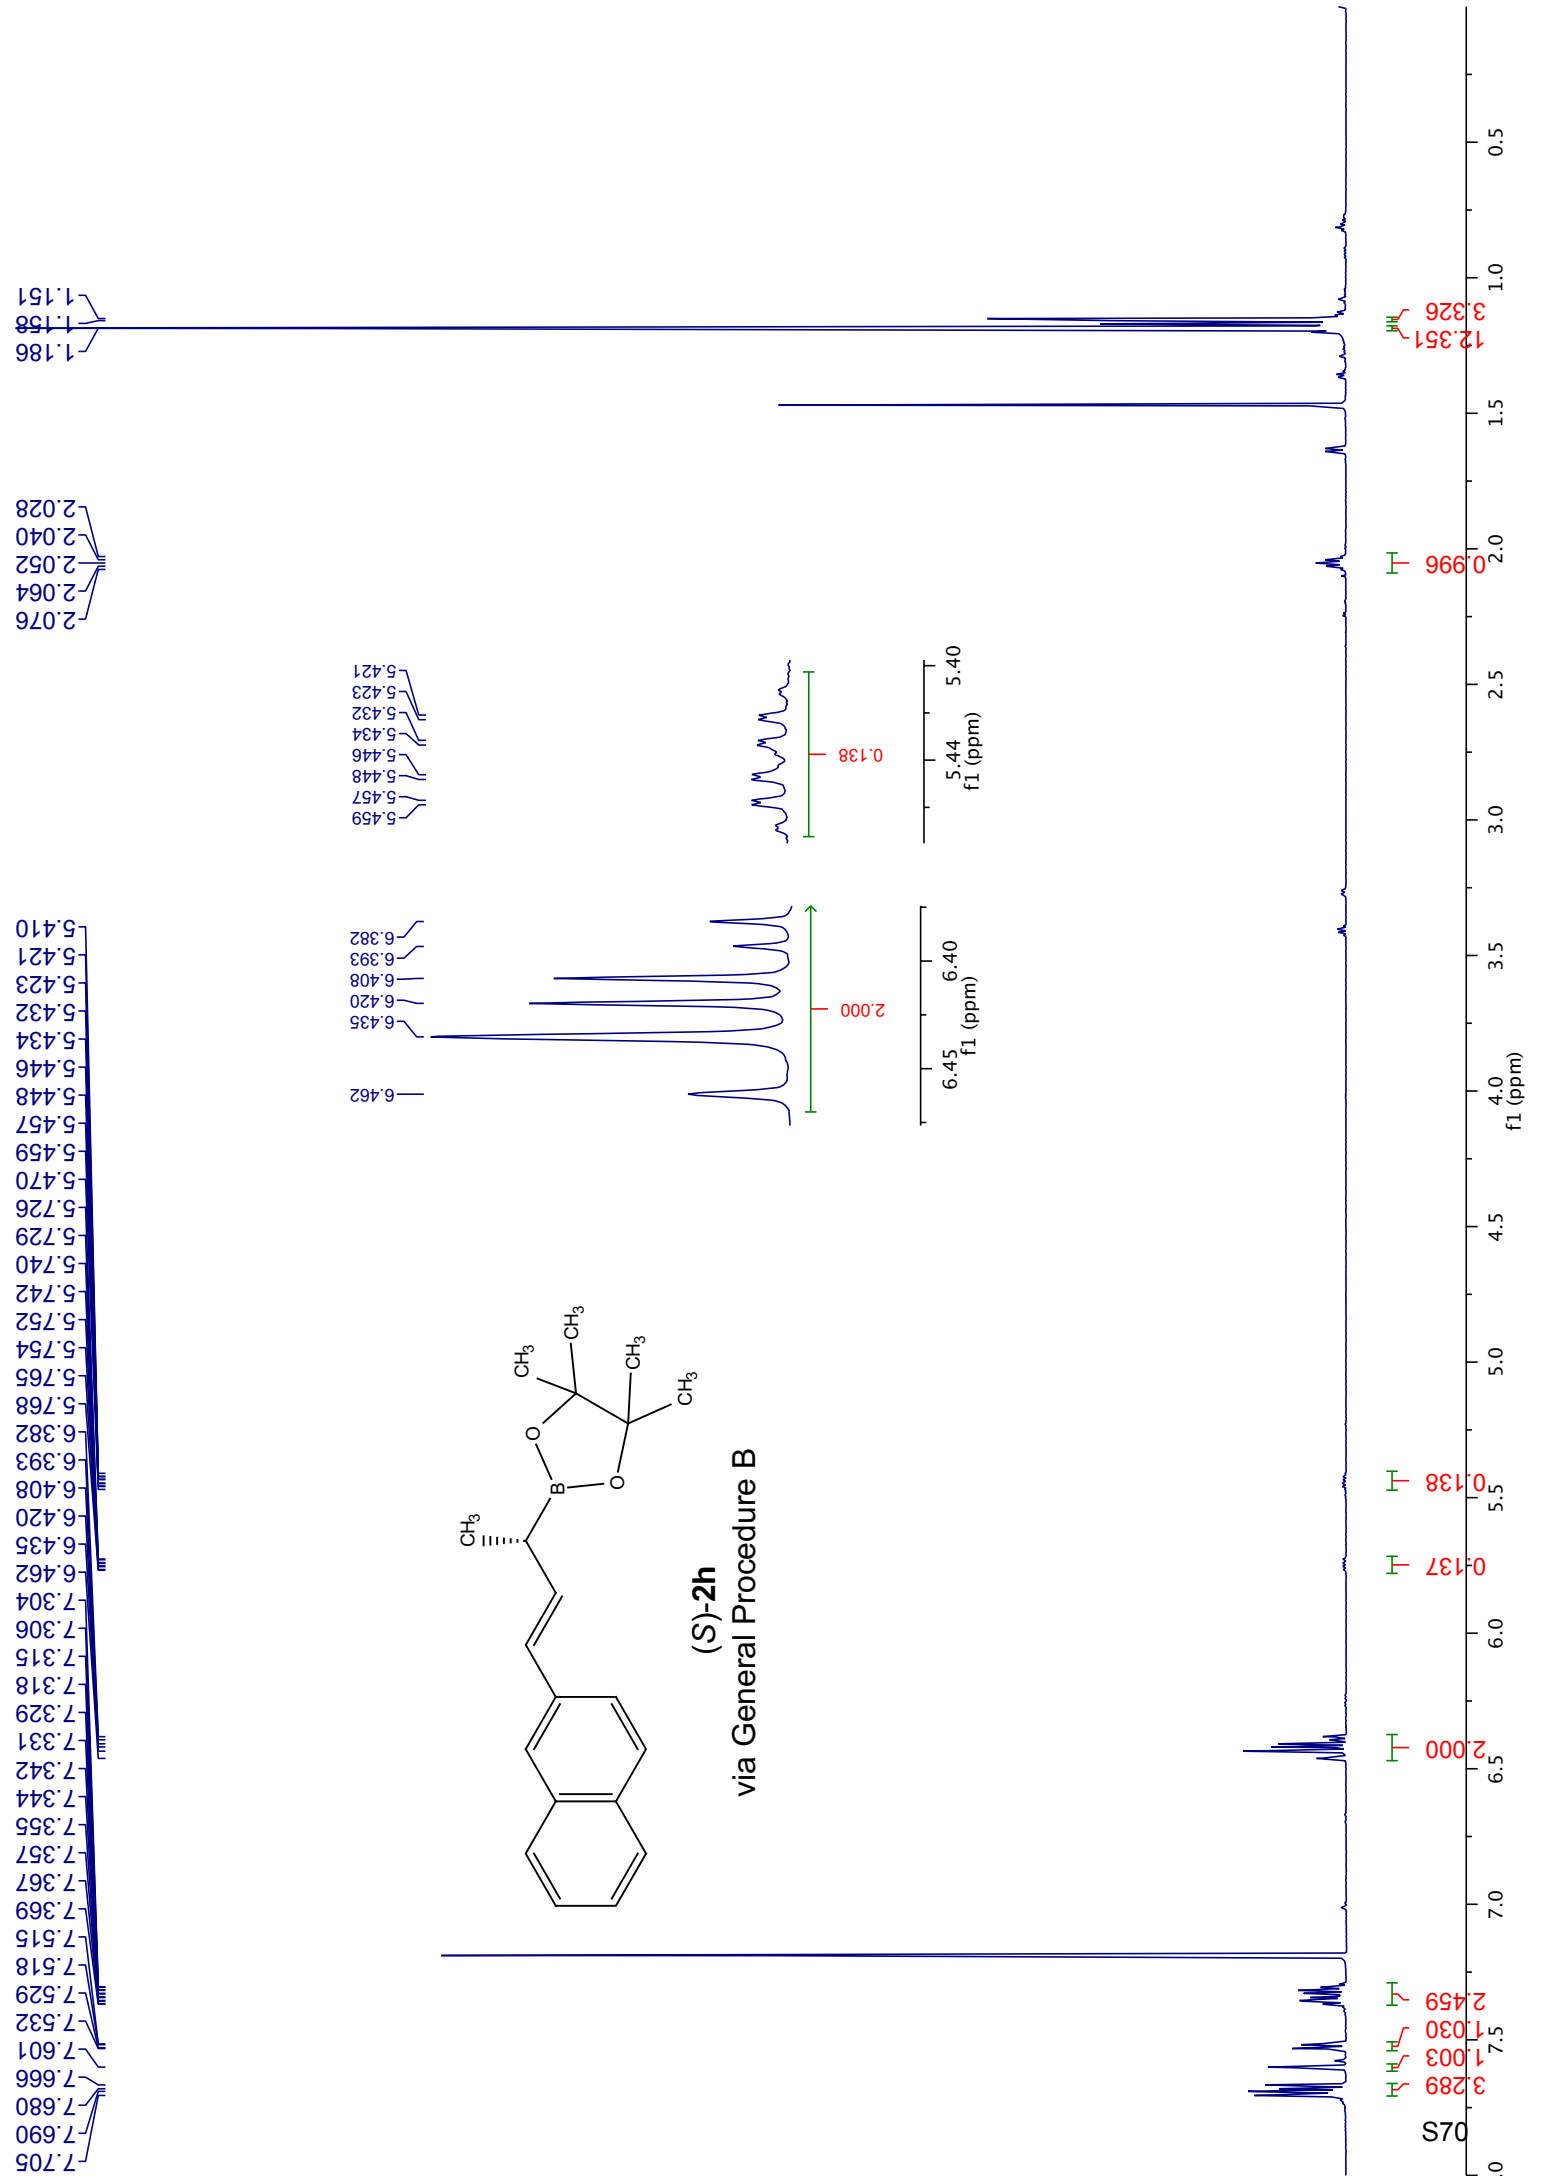

6.270  
6.283  
6.296  
6.309  
6.564  
6.565  
6.590  
6.591  
7.028  
7.221  
7.223  
7.235  
7.246  
7.248  
7.260  
7.260  
7.270  
7.272  
7.282  
7.284  
7.625  
7.637  
7.711  
7.711  
7.724

2.112  
2.100  
2.088  
2.076  
2.064  
1.251  
1.214  
1.202

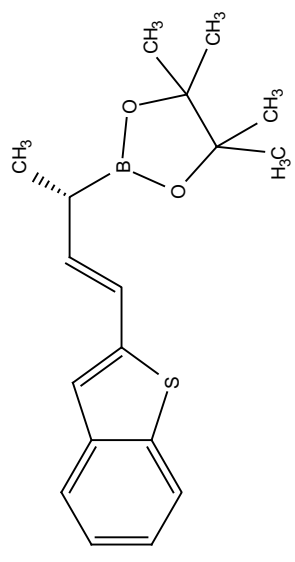

(S)-2i  
via General Procedure A

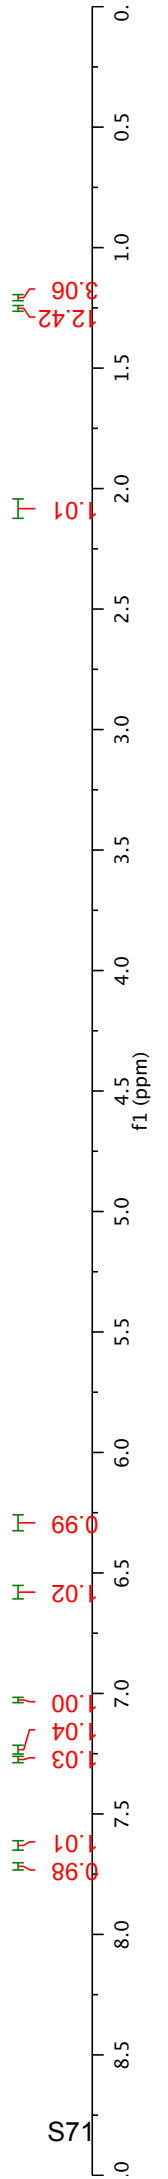

17S

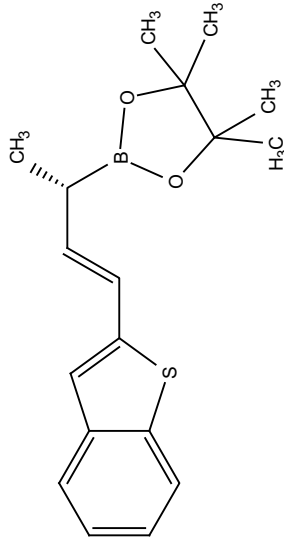

(S)-2i

via General Procedure A

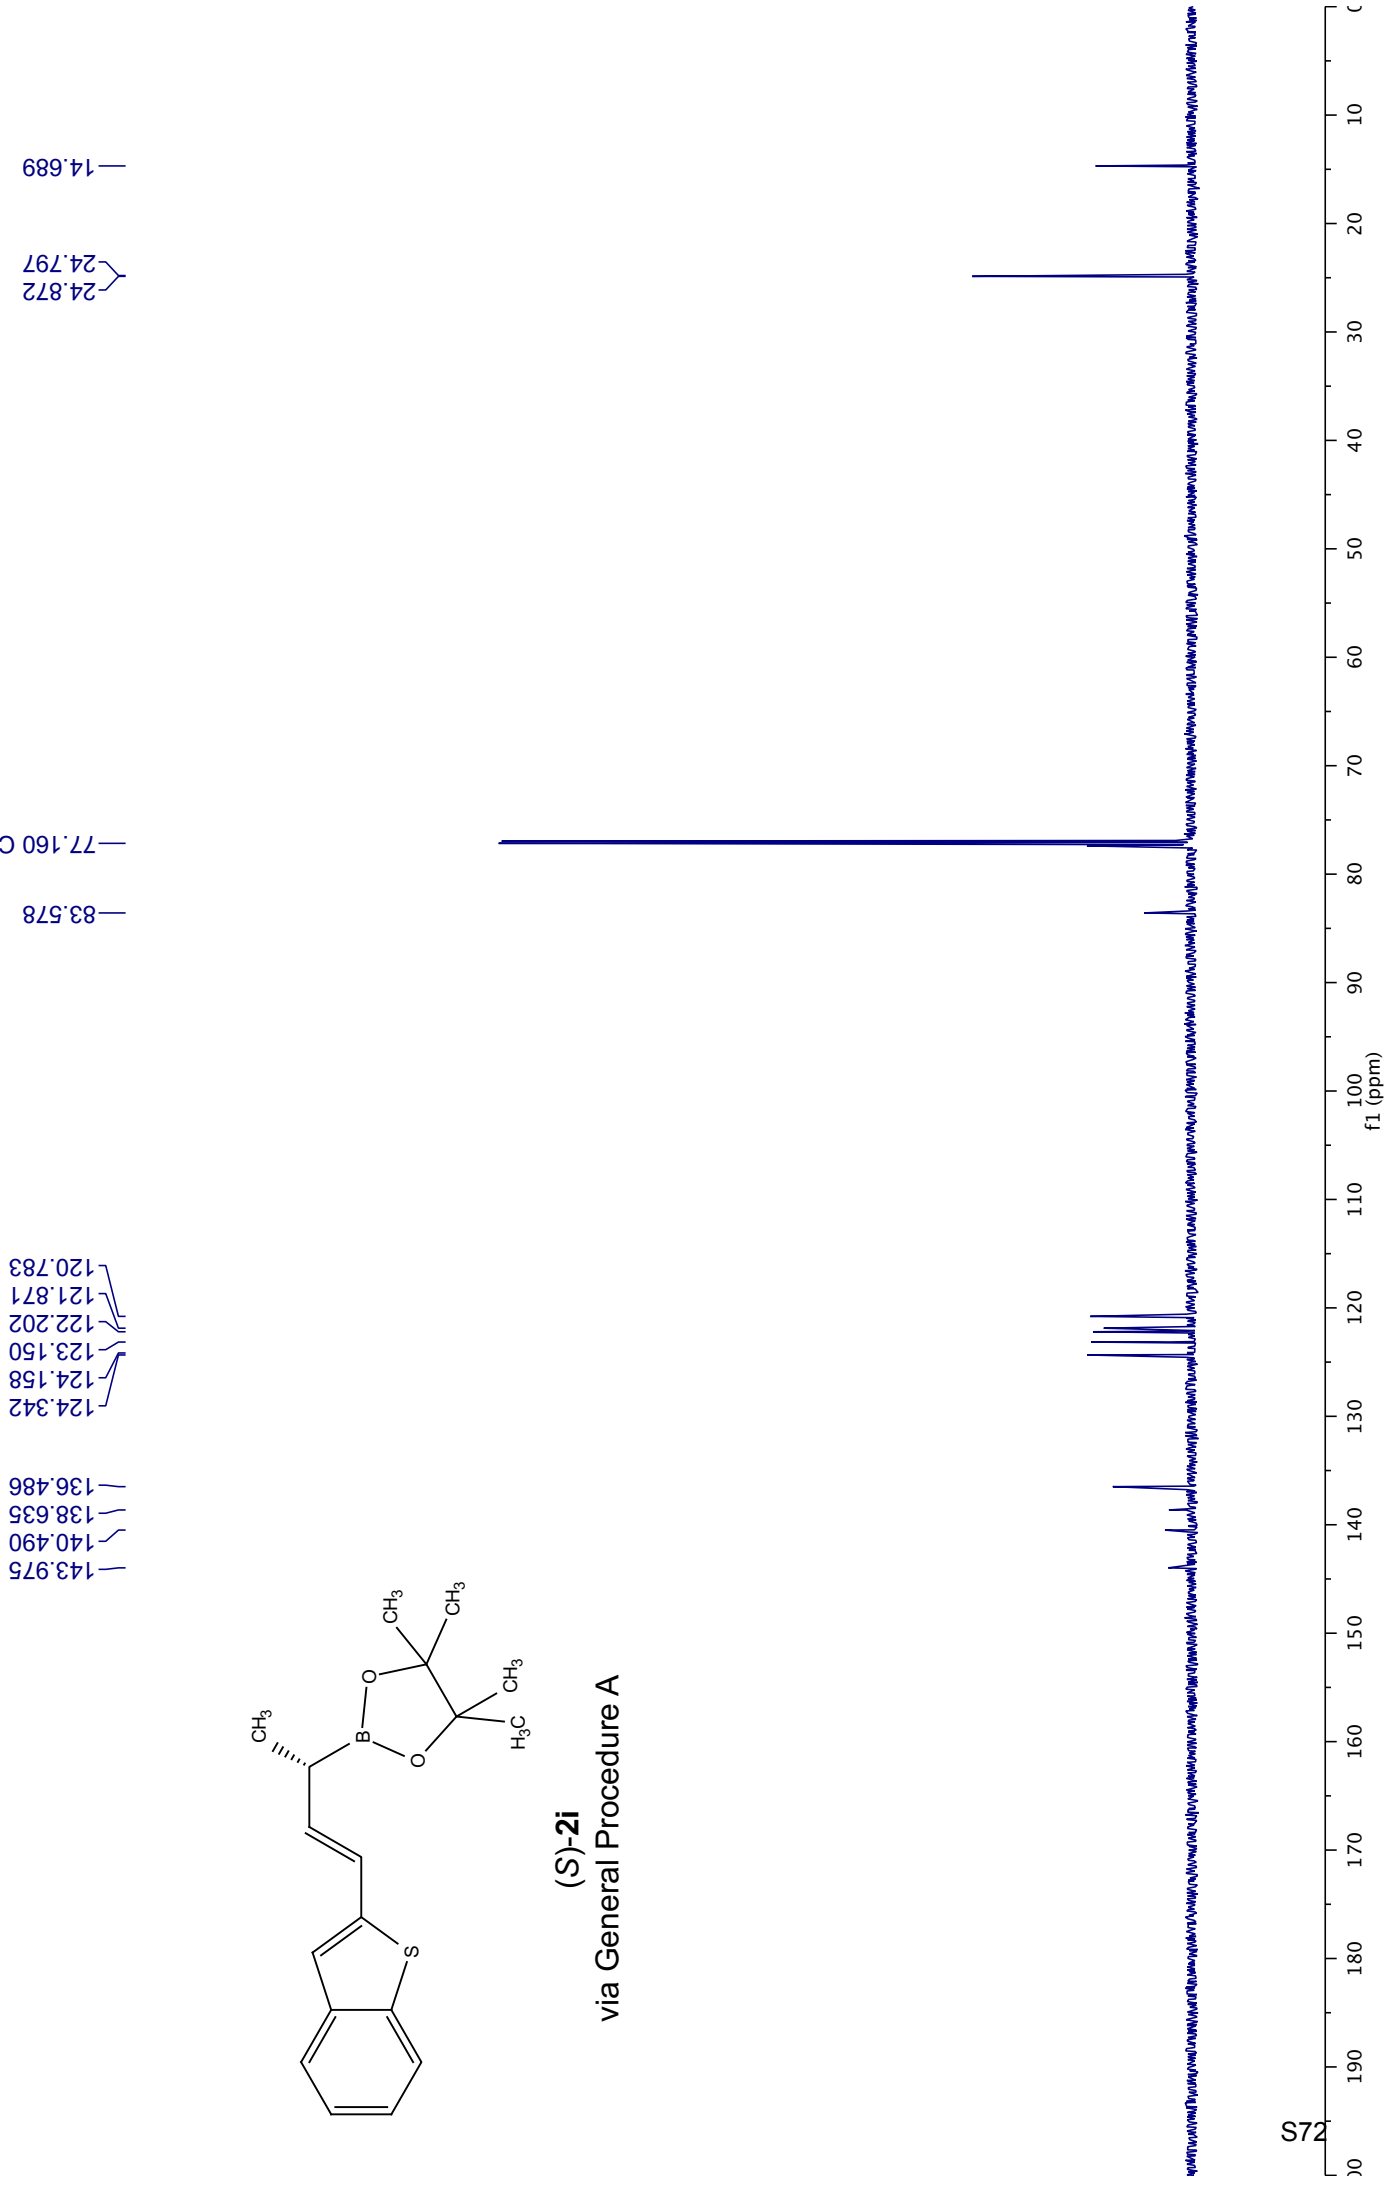



7.288  
7.285  
7.260  
6.329  
6.326  
6.323  
6.320  
6.313  
6.301  
6.287  
6.274  
6.191  
6.189  
6.164  
6.162  
6.105  
6.099

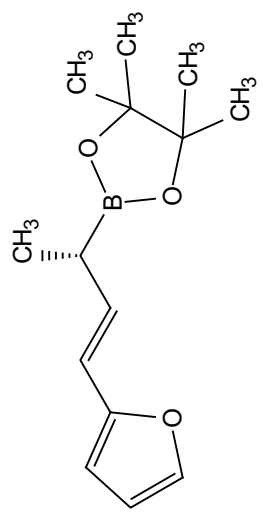

(S)-2j  
via General Procedure A

1.239  
1.171  
1.159

2.041  
2.029  
2.018  
2.016  
2.004  
1.992

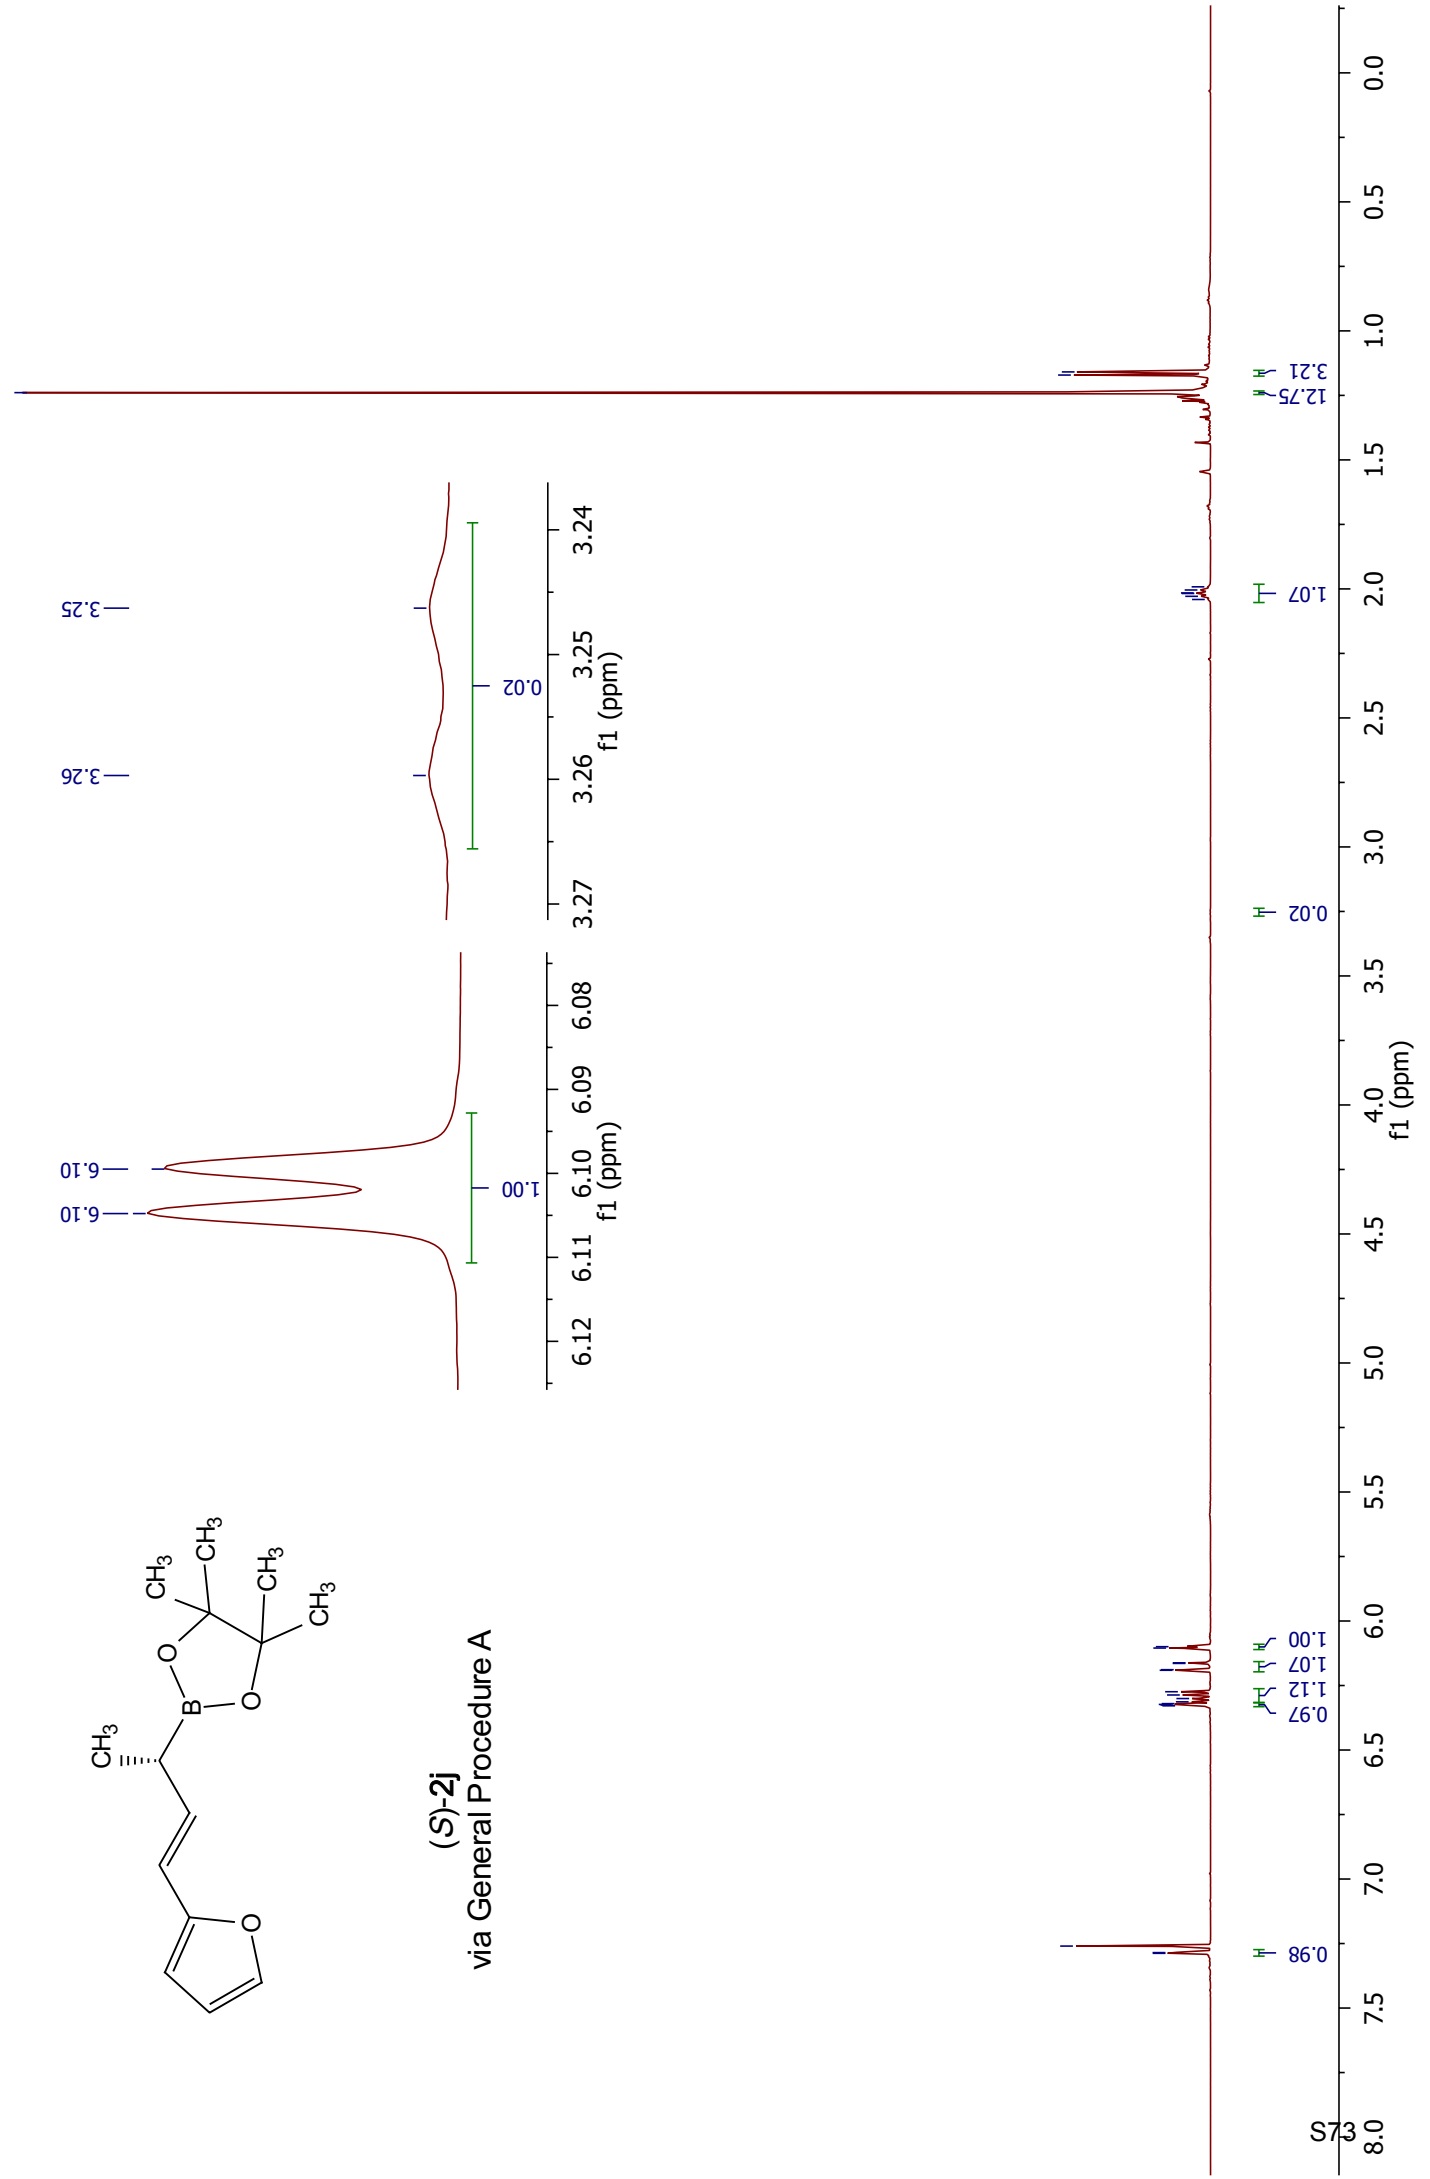

12.75  
3.21

1.07

0.02

0.97  
1.12  
1.07  
1.00

0.98

CDCl<sub>3</sub>

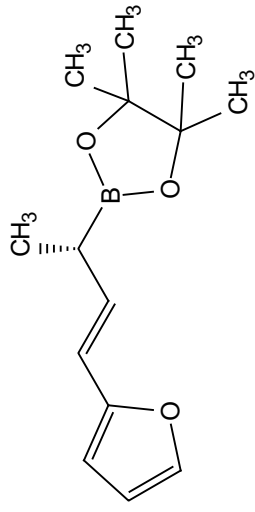

(S)-2j  
via General Procedure A

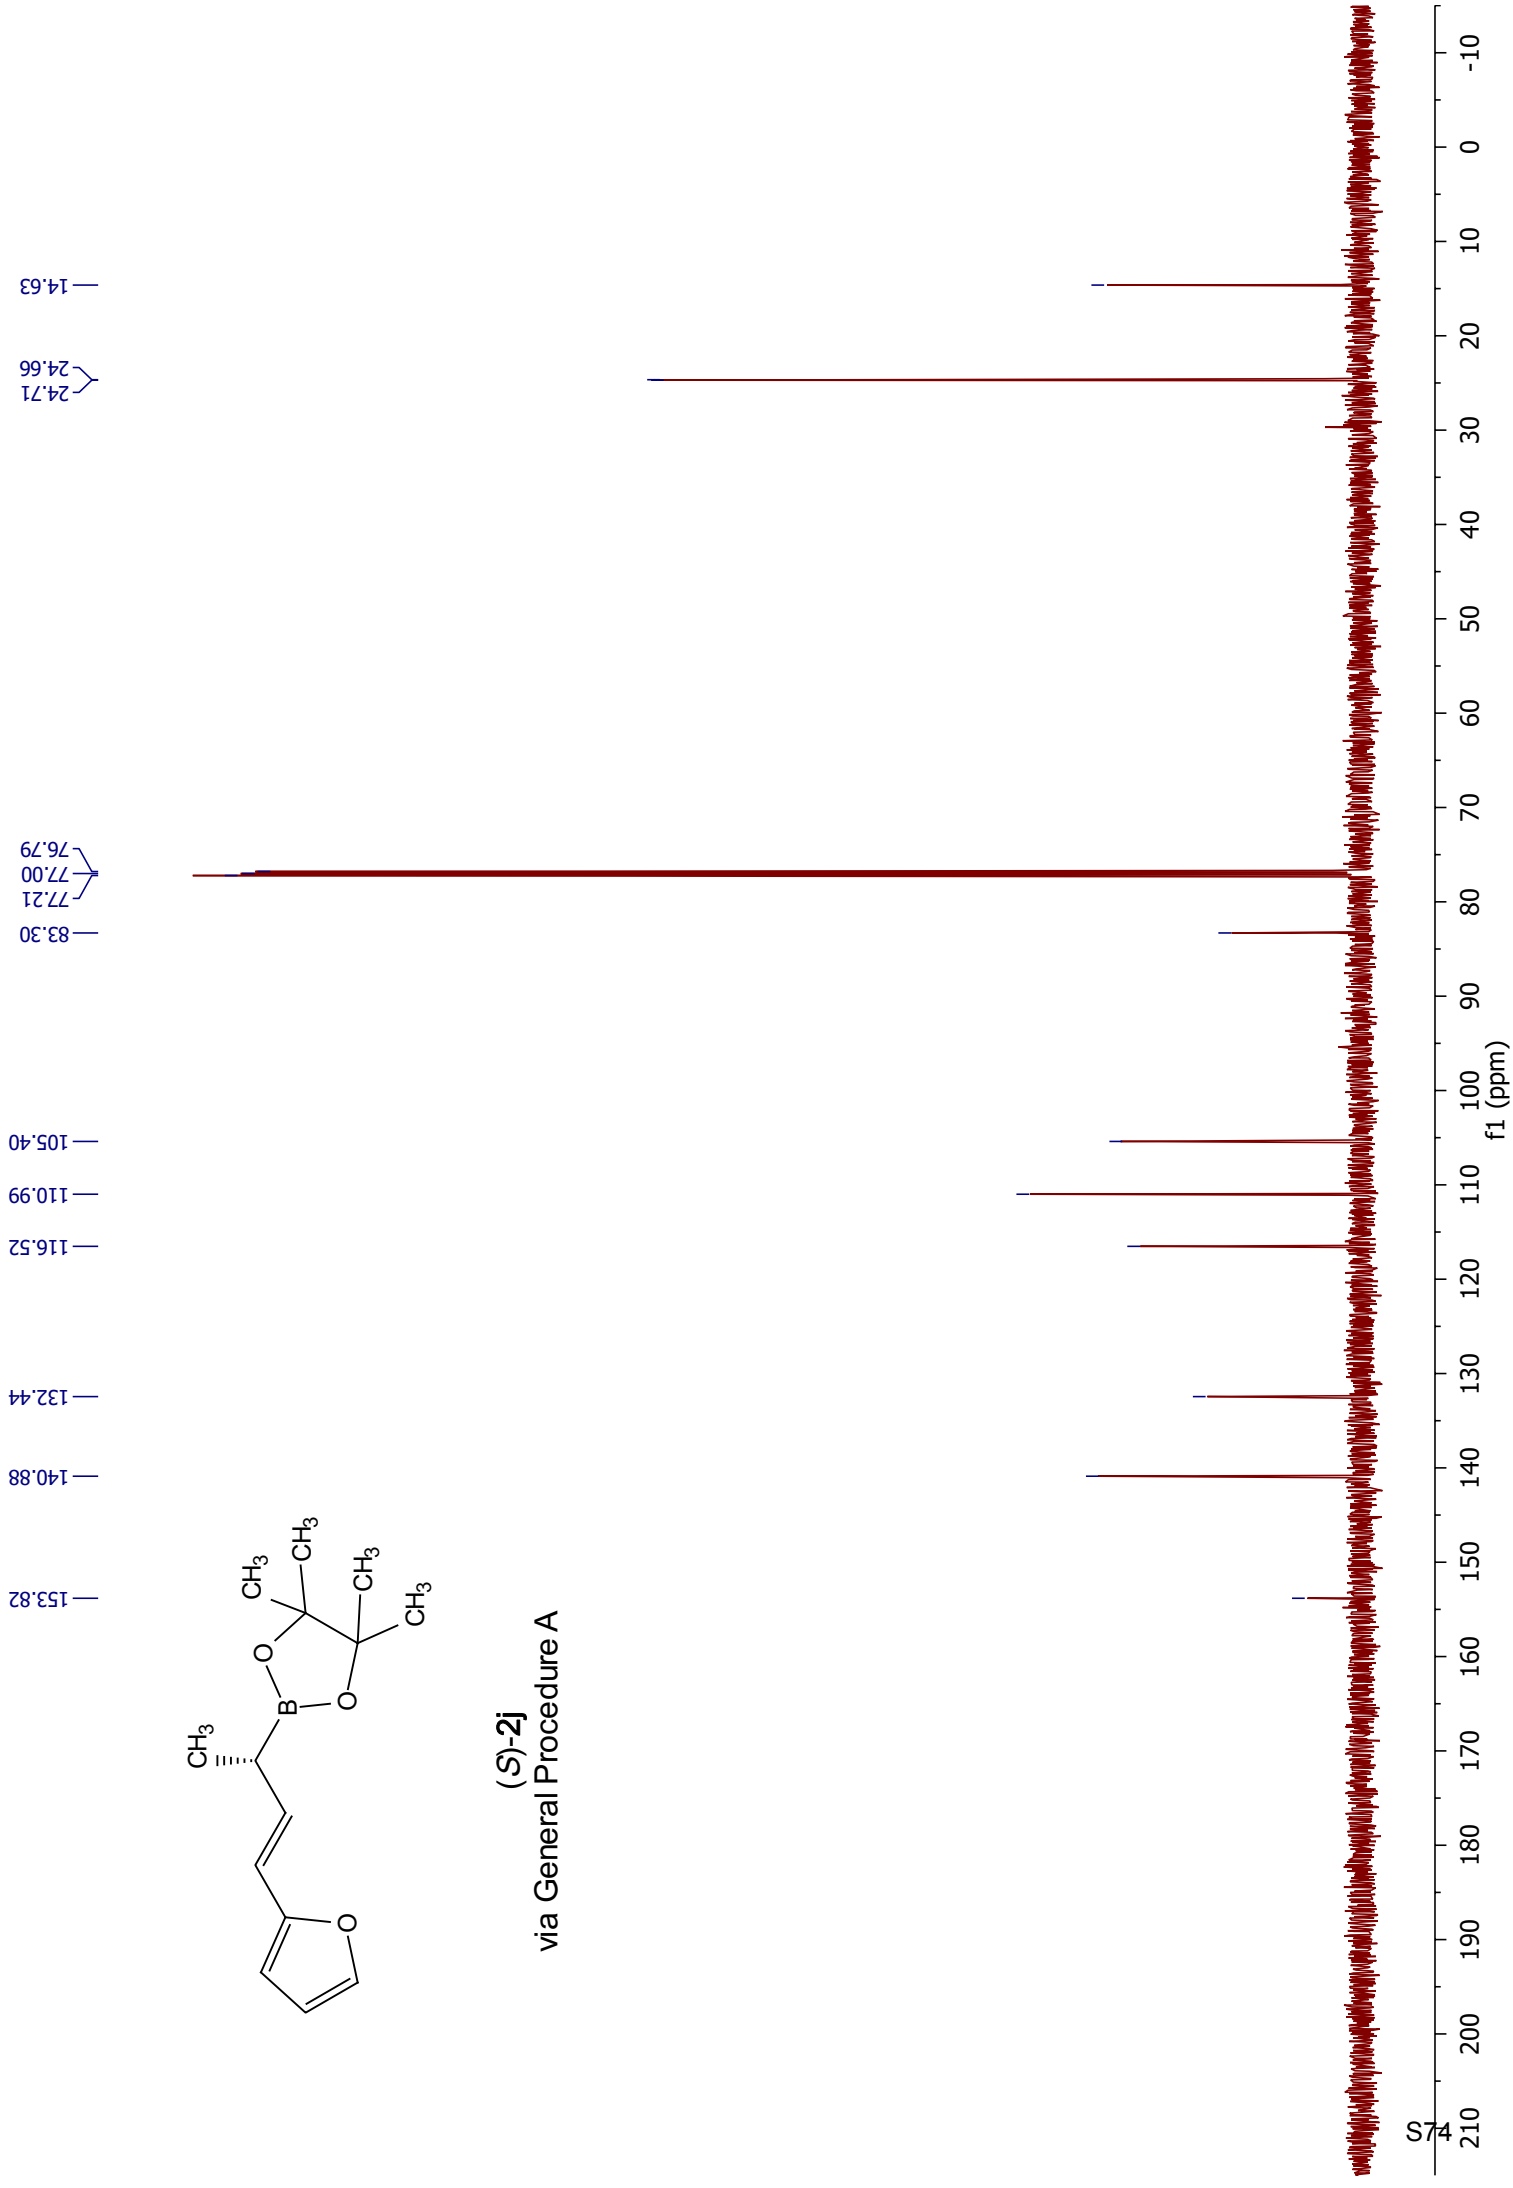

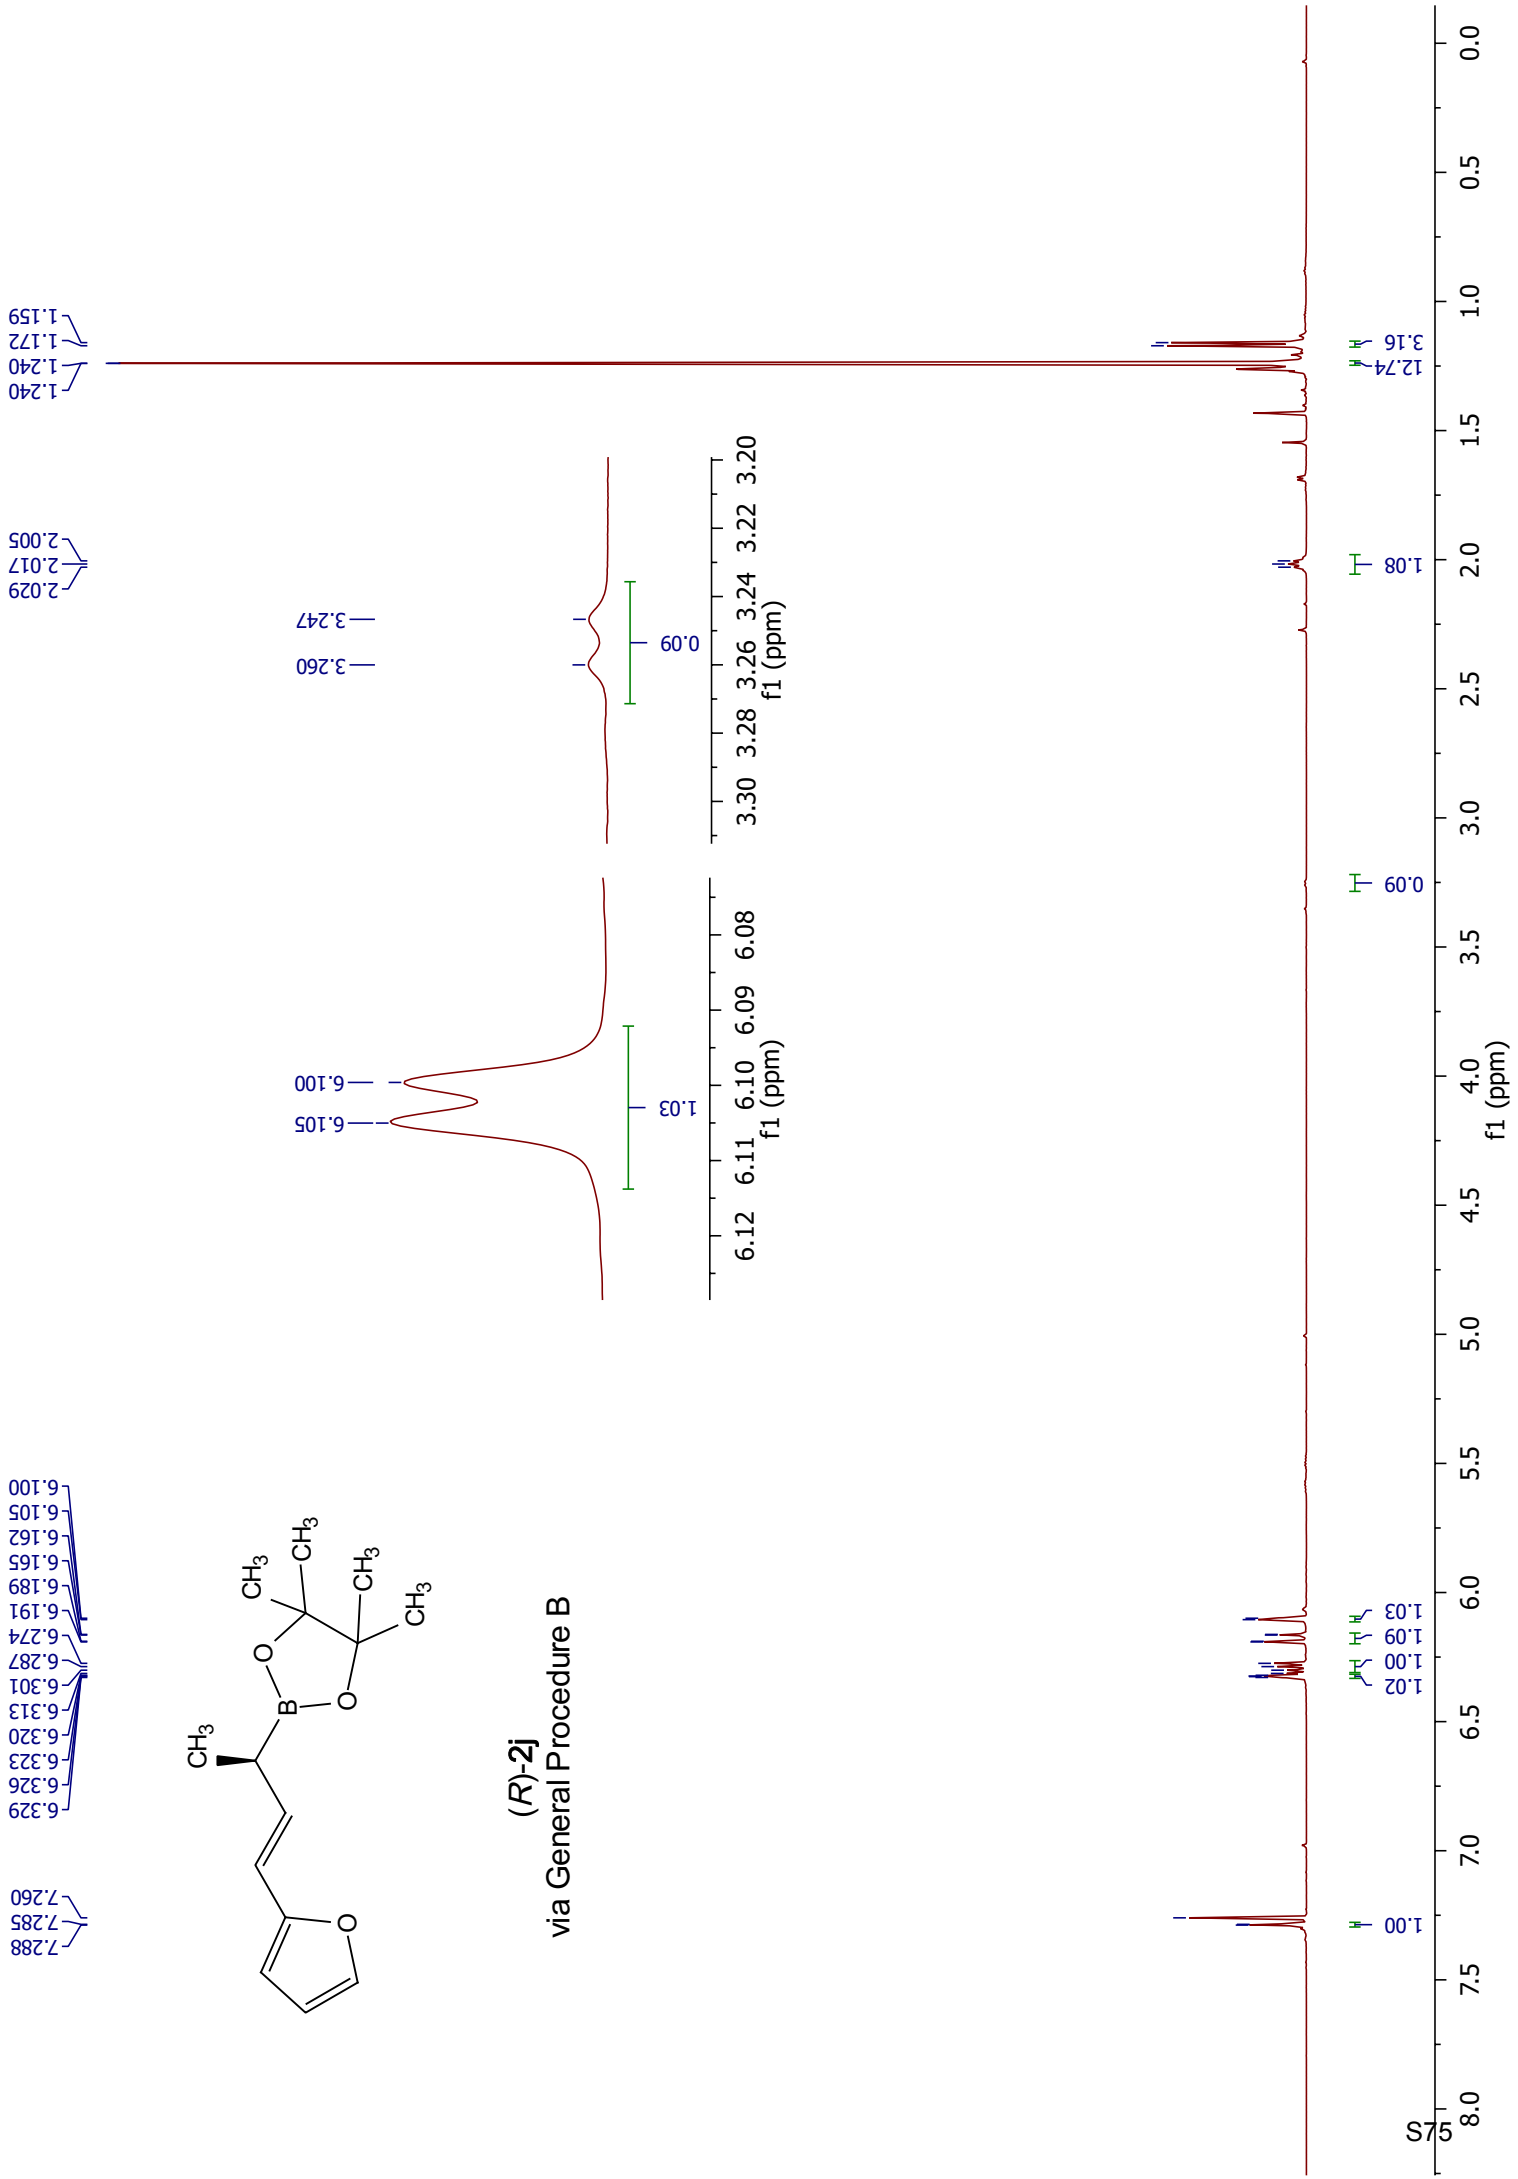

**(R)-2j**  
via General Procedure B

1.919  
1.906  
1.893  
1.880  
1.719  
1.707  
1.697  
1.695  
1.685  
1.682  
1.672  
1.660  
1.648  
1.583  
1.570  
1.558  
1.548  
1.546  
1.538  
1.536  
1.523  
1.511  
0.966  
0.954  
0.941

6.237  
6.222  
6.210  
6.195

3.183  
3.169

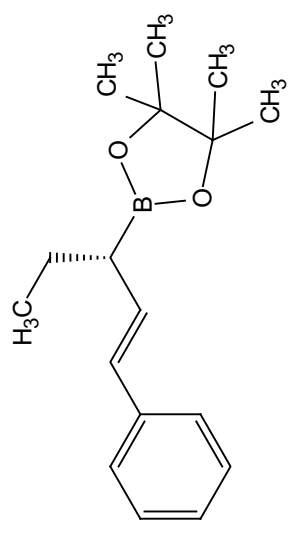

(S)-2k  
via General Procedure A

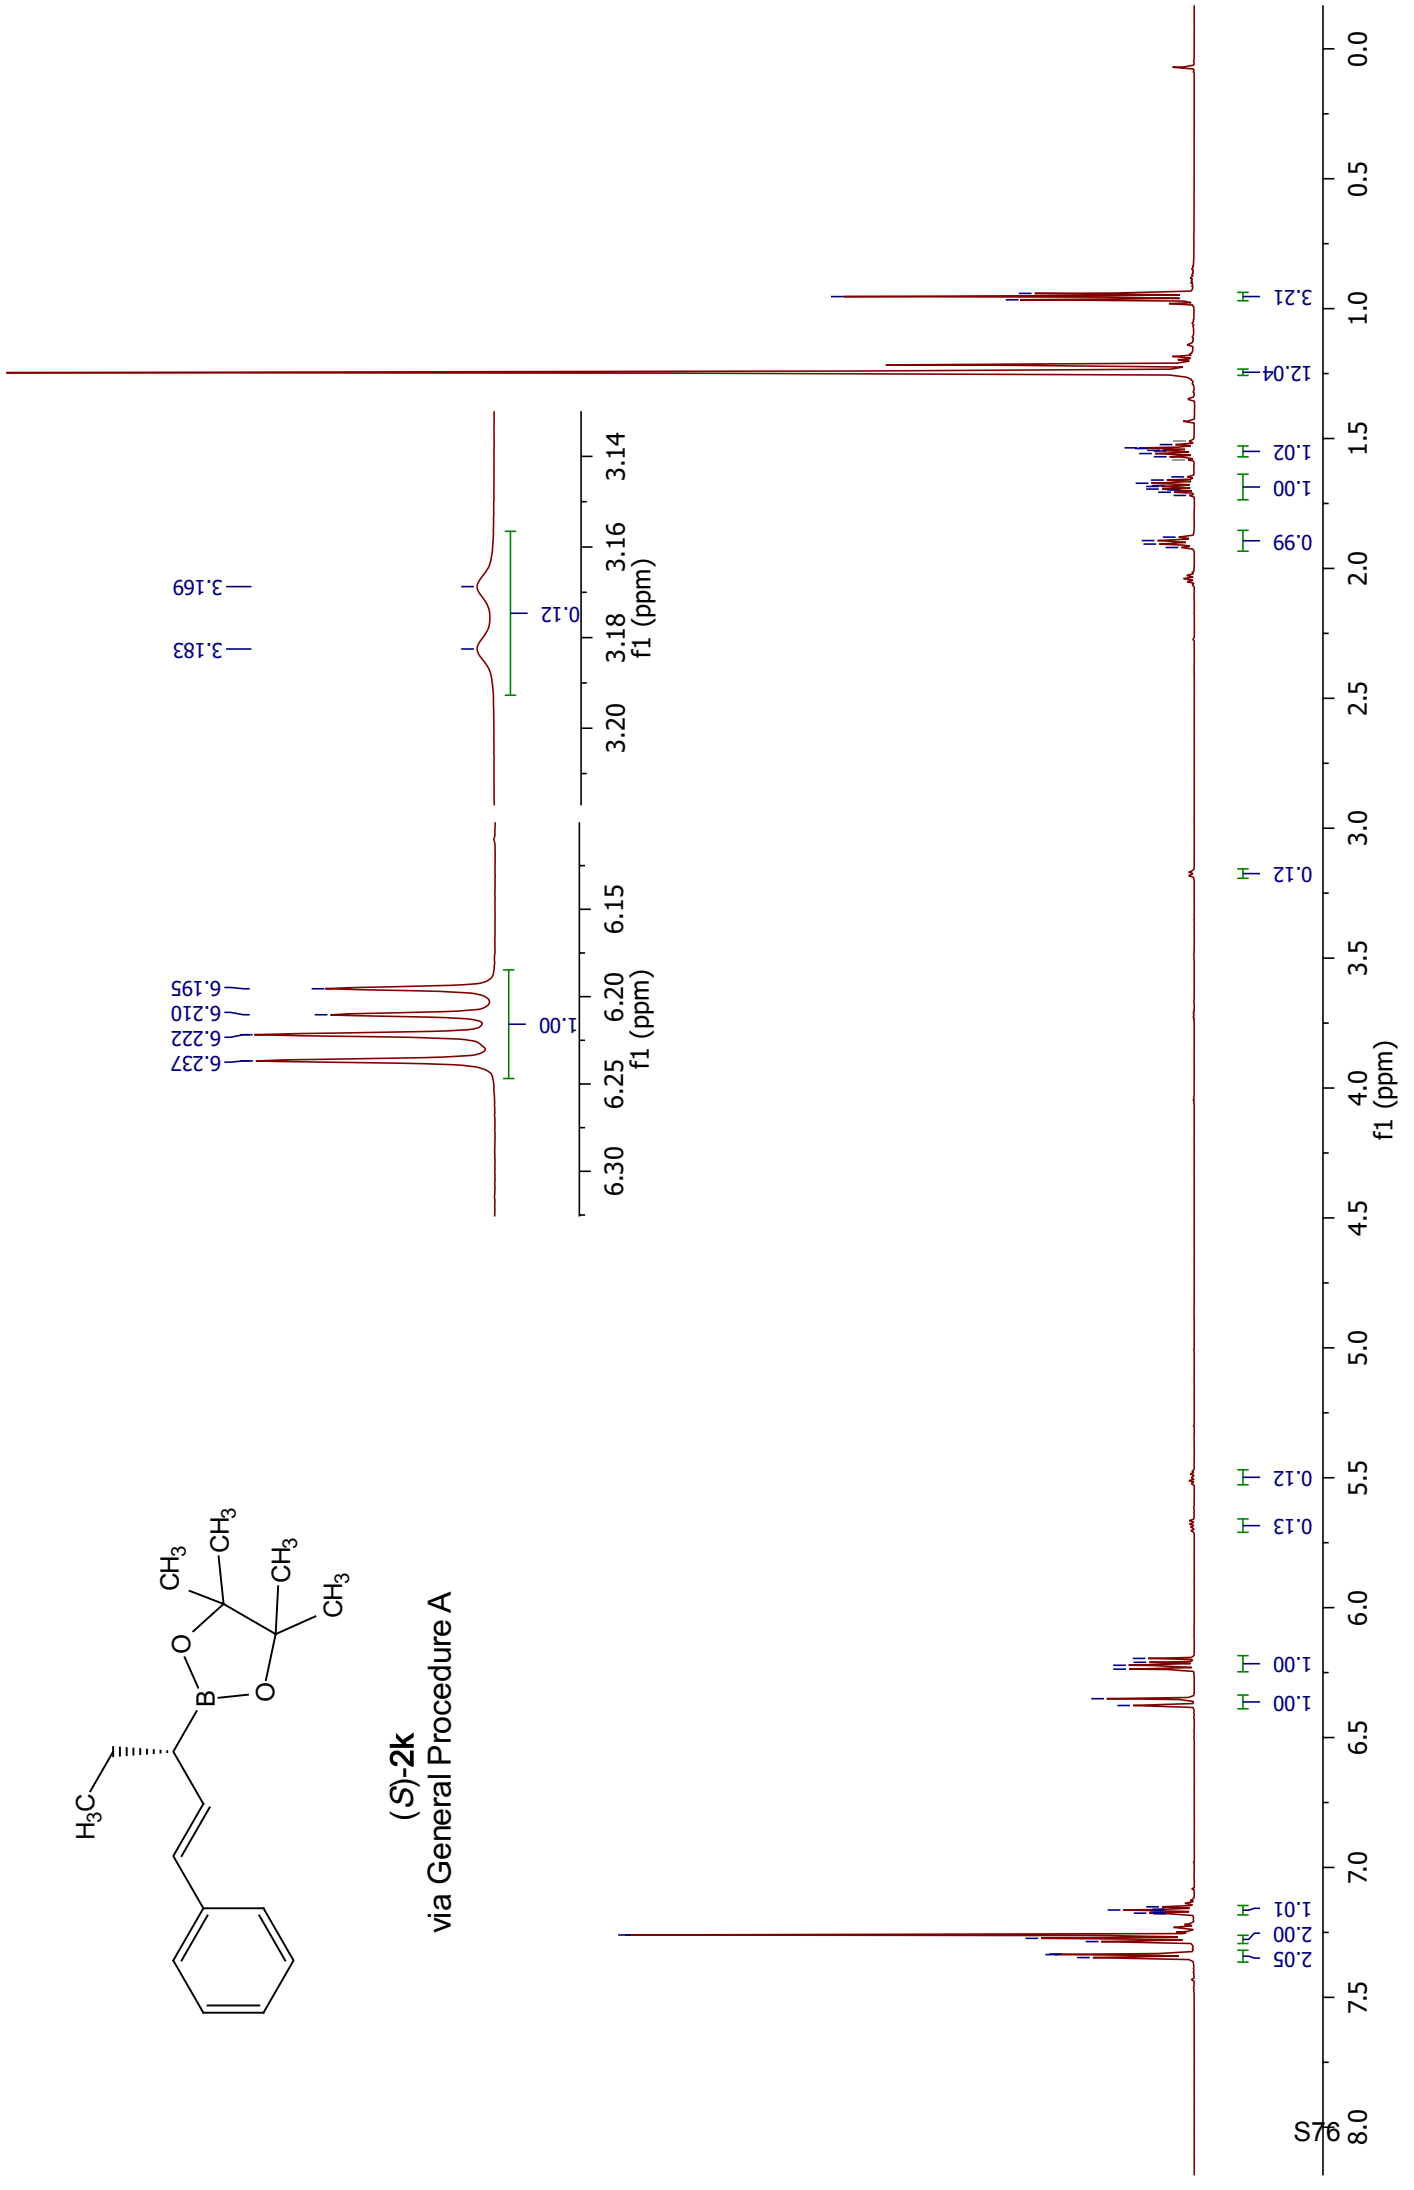

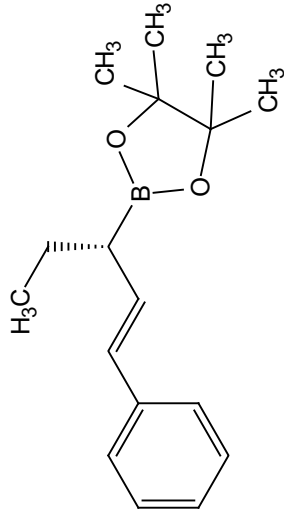

(S)-2k  
via General Procedure A

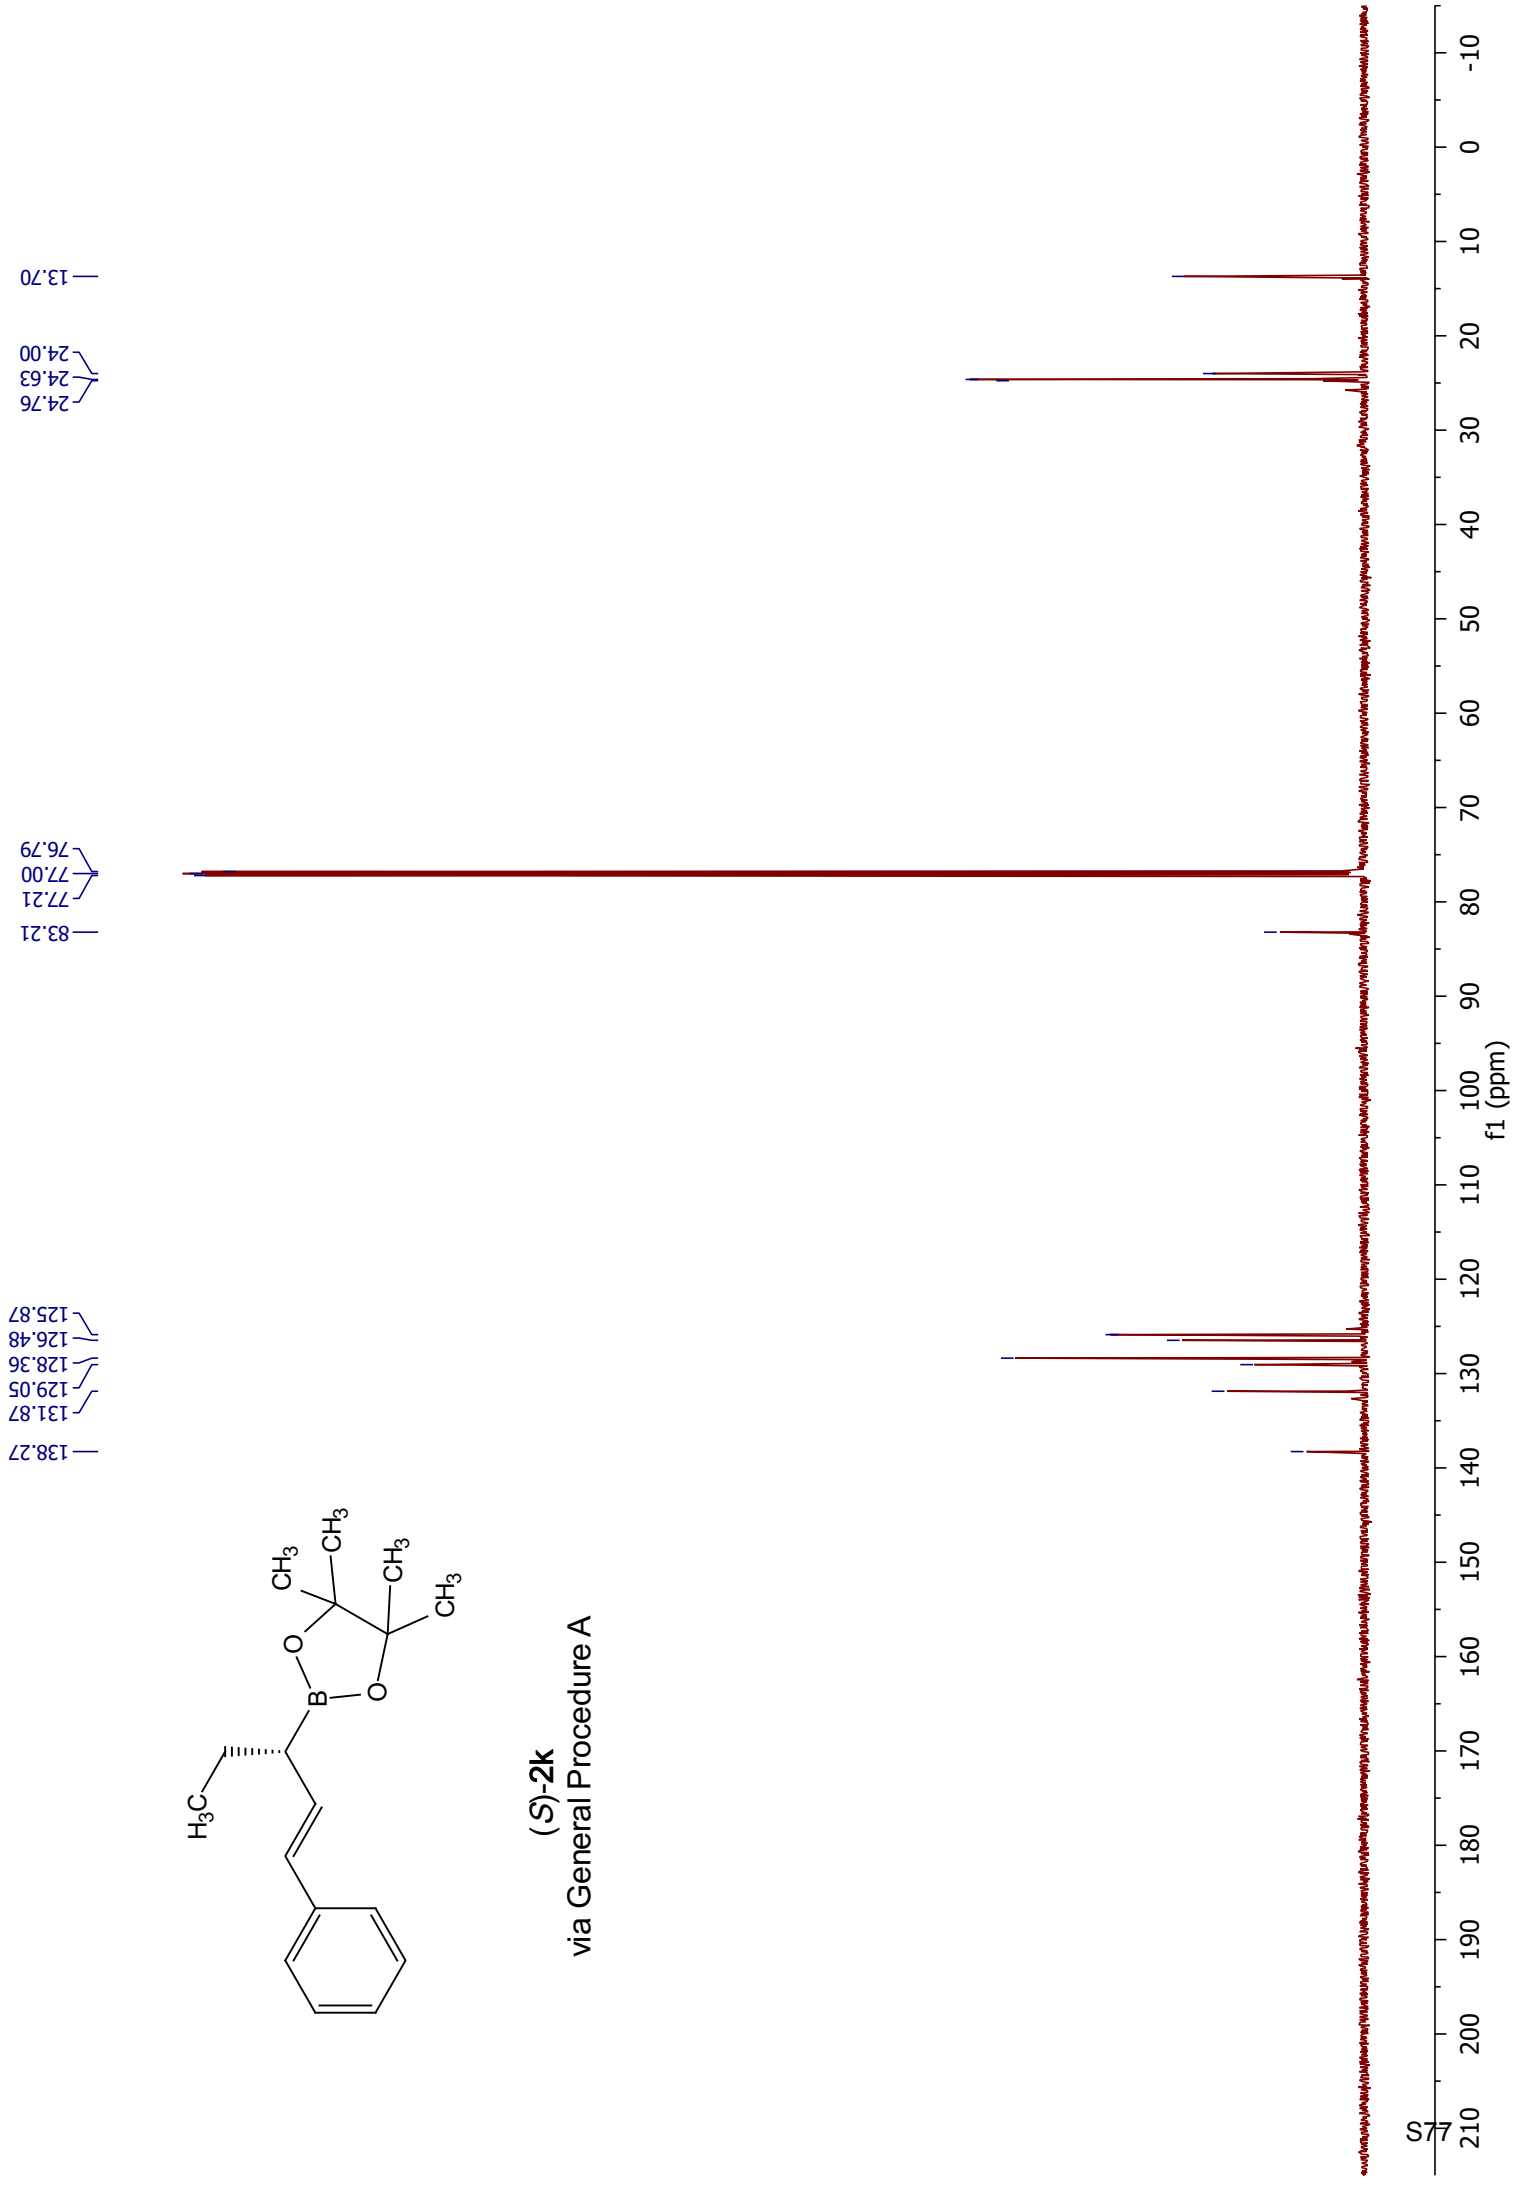

1.919  
1.906  
1.893  
1.880  
1.800  
1.719  
1.707  
1.697  
1.695  
1.685  
1.682  
1.672  
1.660  
1.648  
1.570  
1.558  
1.548  
1.546  
1.540  
1.538  
1.536  
1.523  
1.247  
1.243  
0.969  
0.966  
0.954  
0.941

3.169  
3.183

6.237  
6.222  
6.210  
6.195

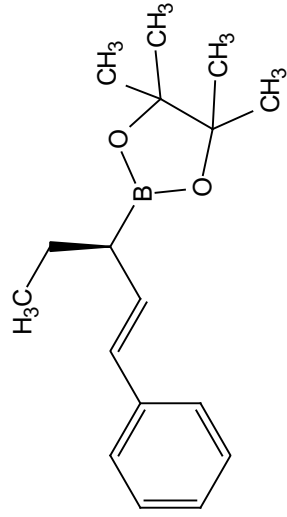

(*R*)-2k  
via General Procedure B

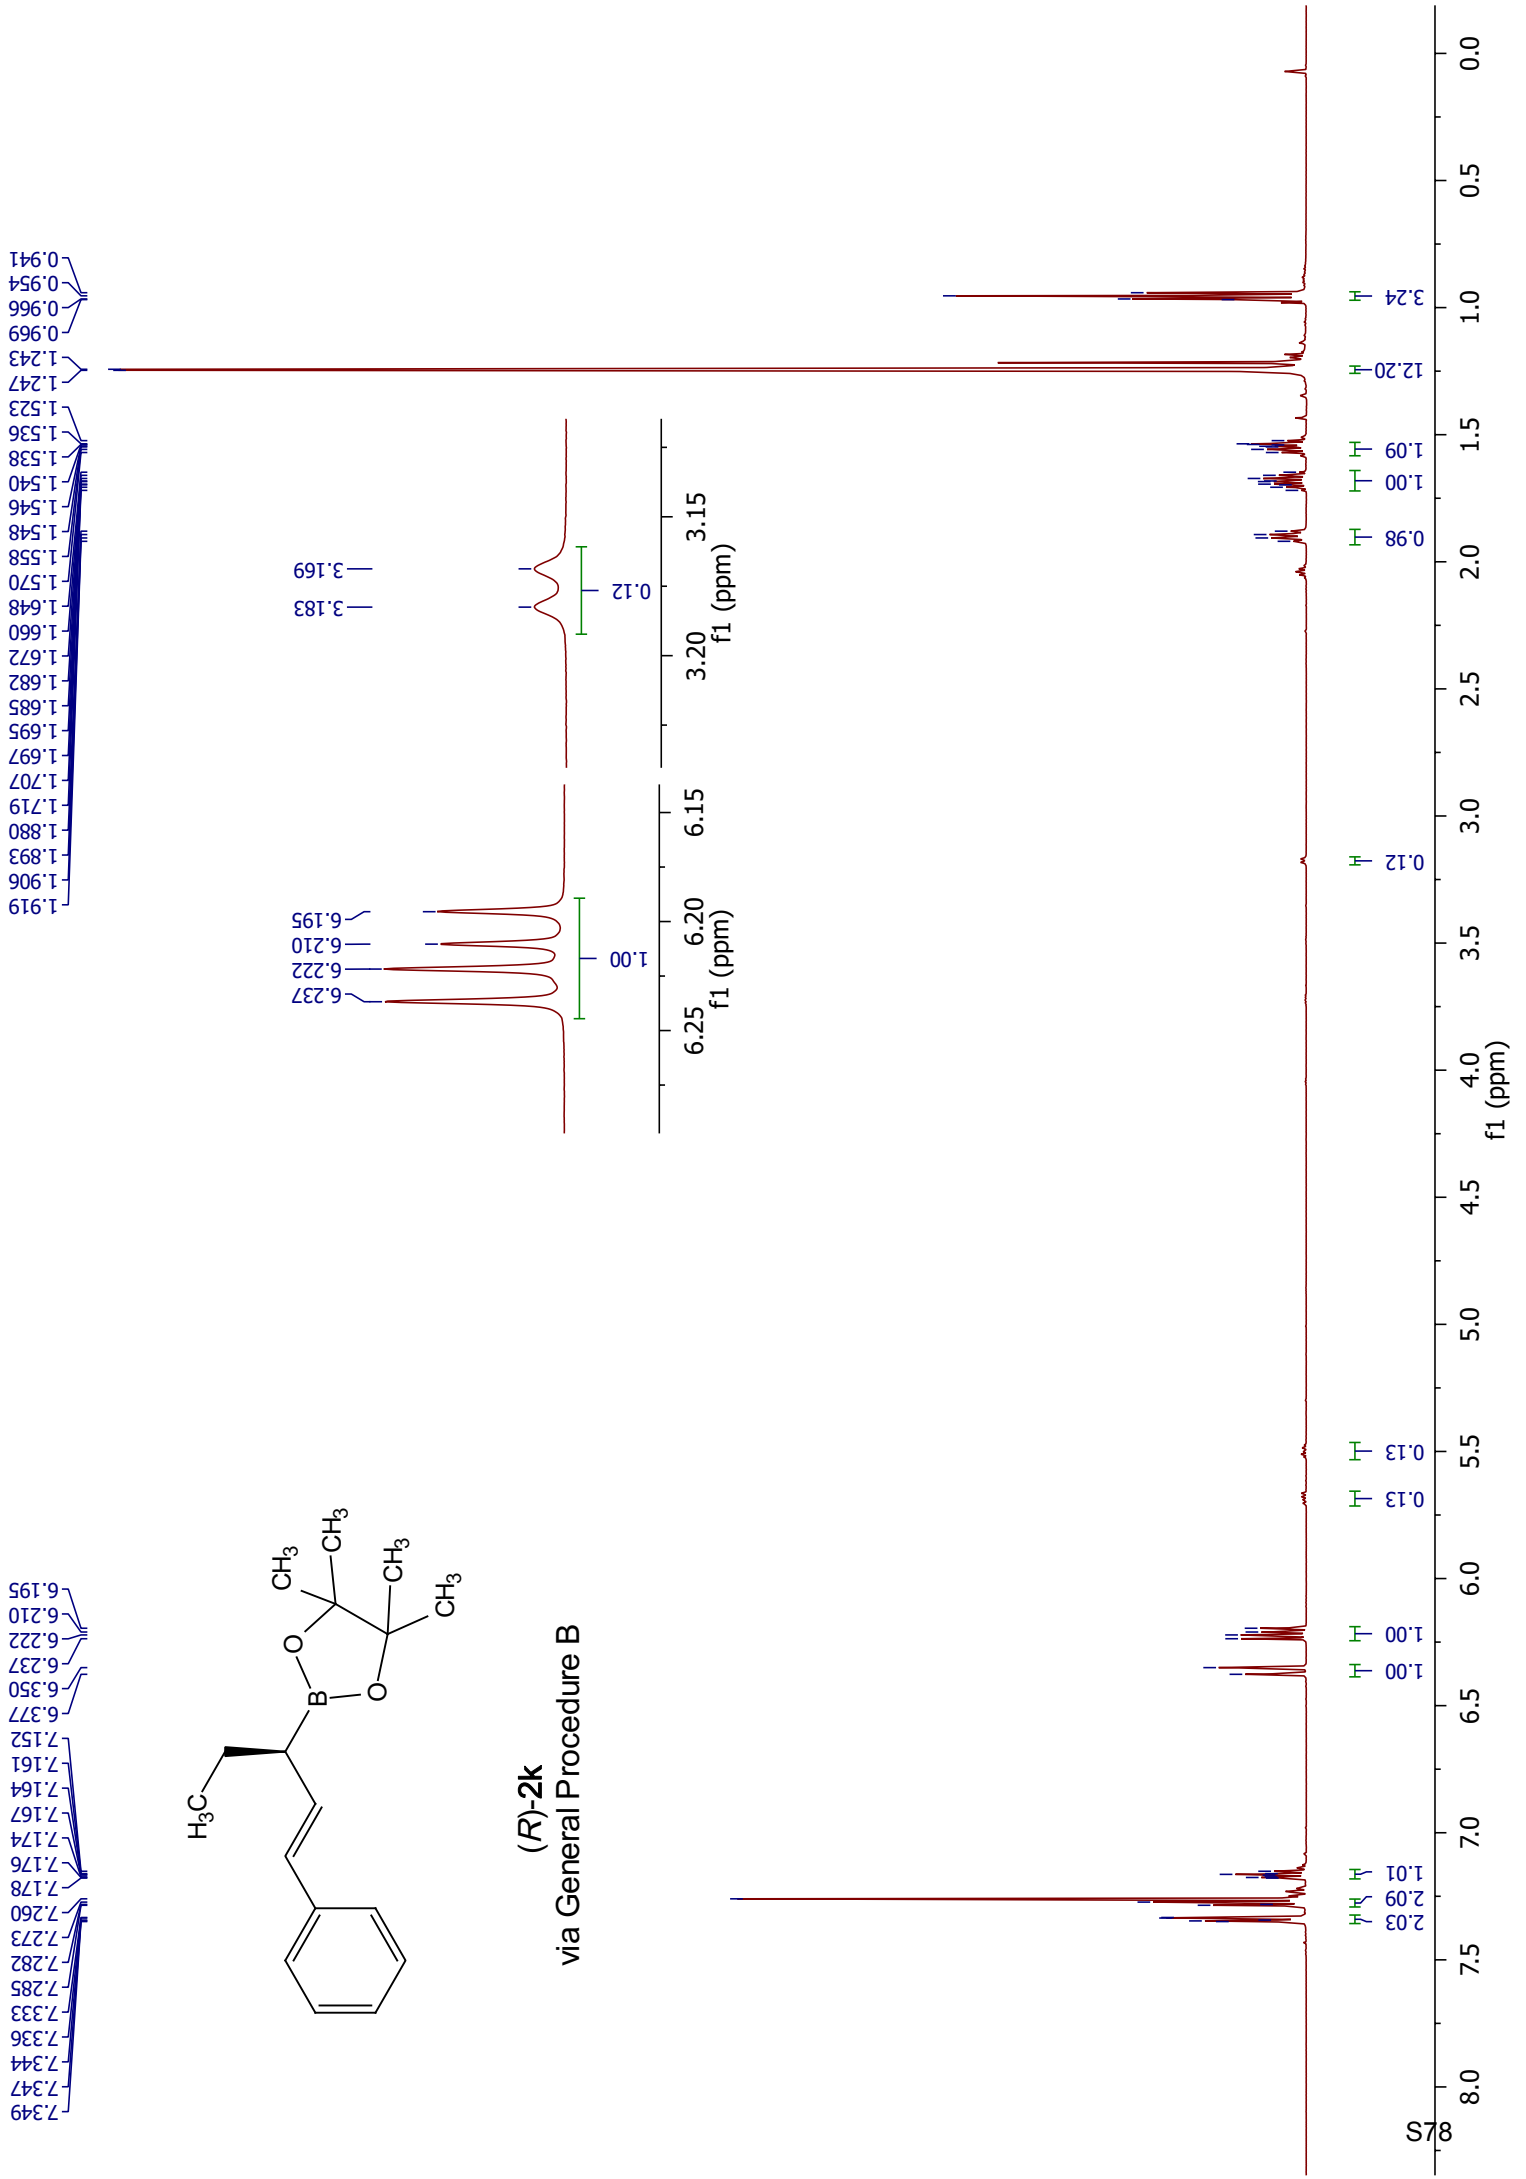

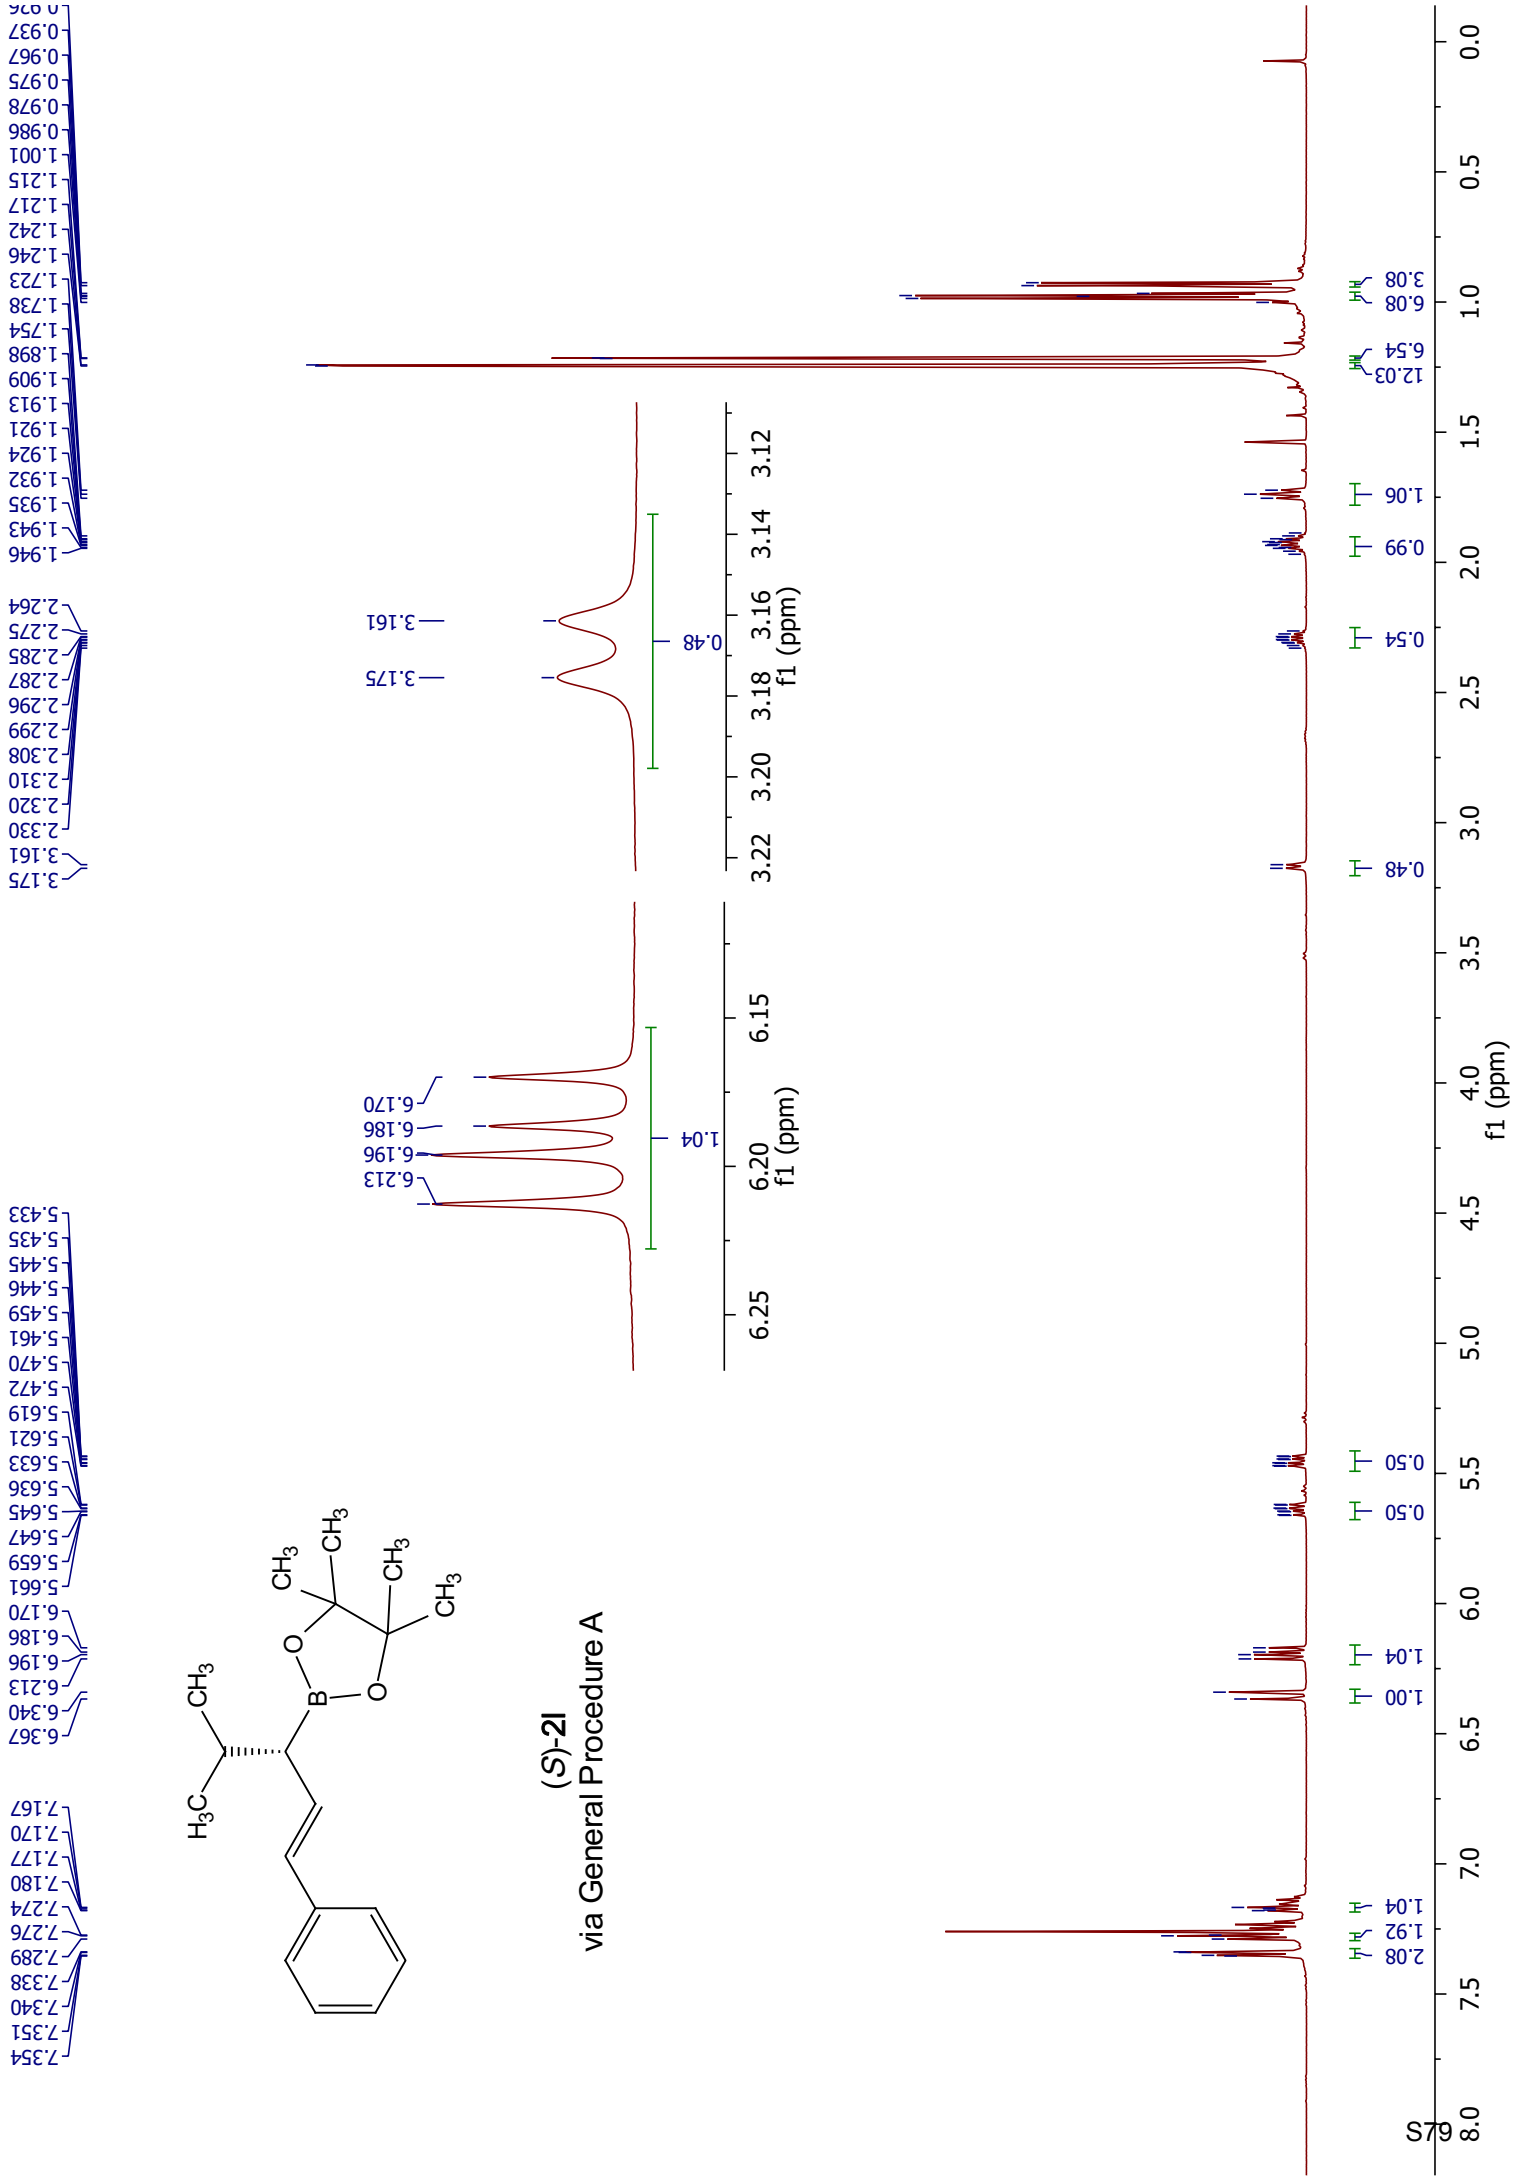

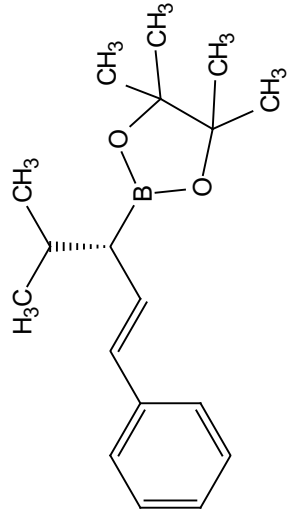

(S)-21  
via General Procedure A

31.19  
29.95  
24.74  
24.66  
24.53  
22.72  
22.63  
22.09

83.37  
83.16

142.33  
138.28  
131.07  
129.97  
128.42  
128.37  
128.27  
128.22  
126.69  
126.48  
125.90  
125.23

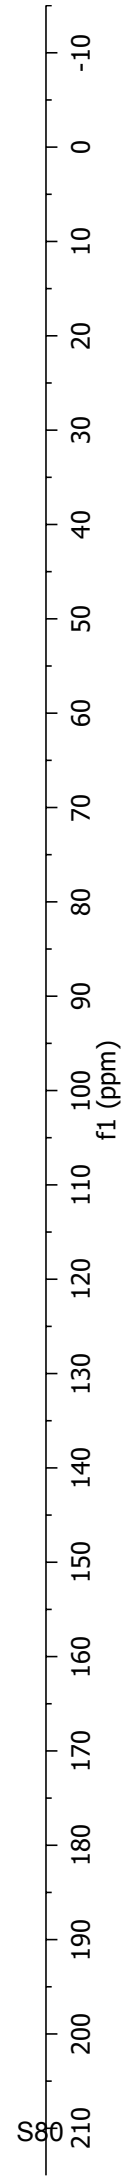



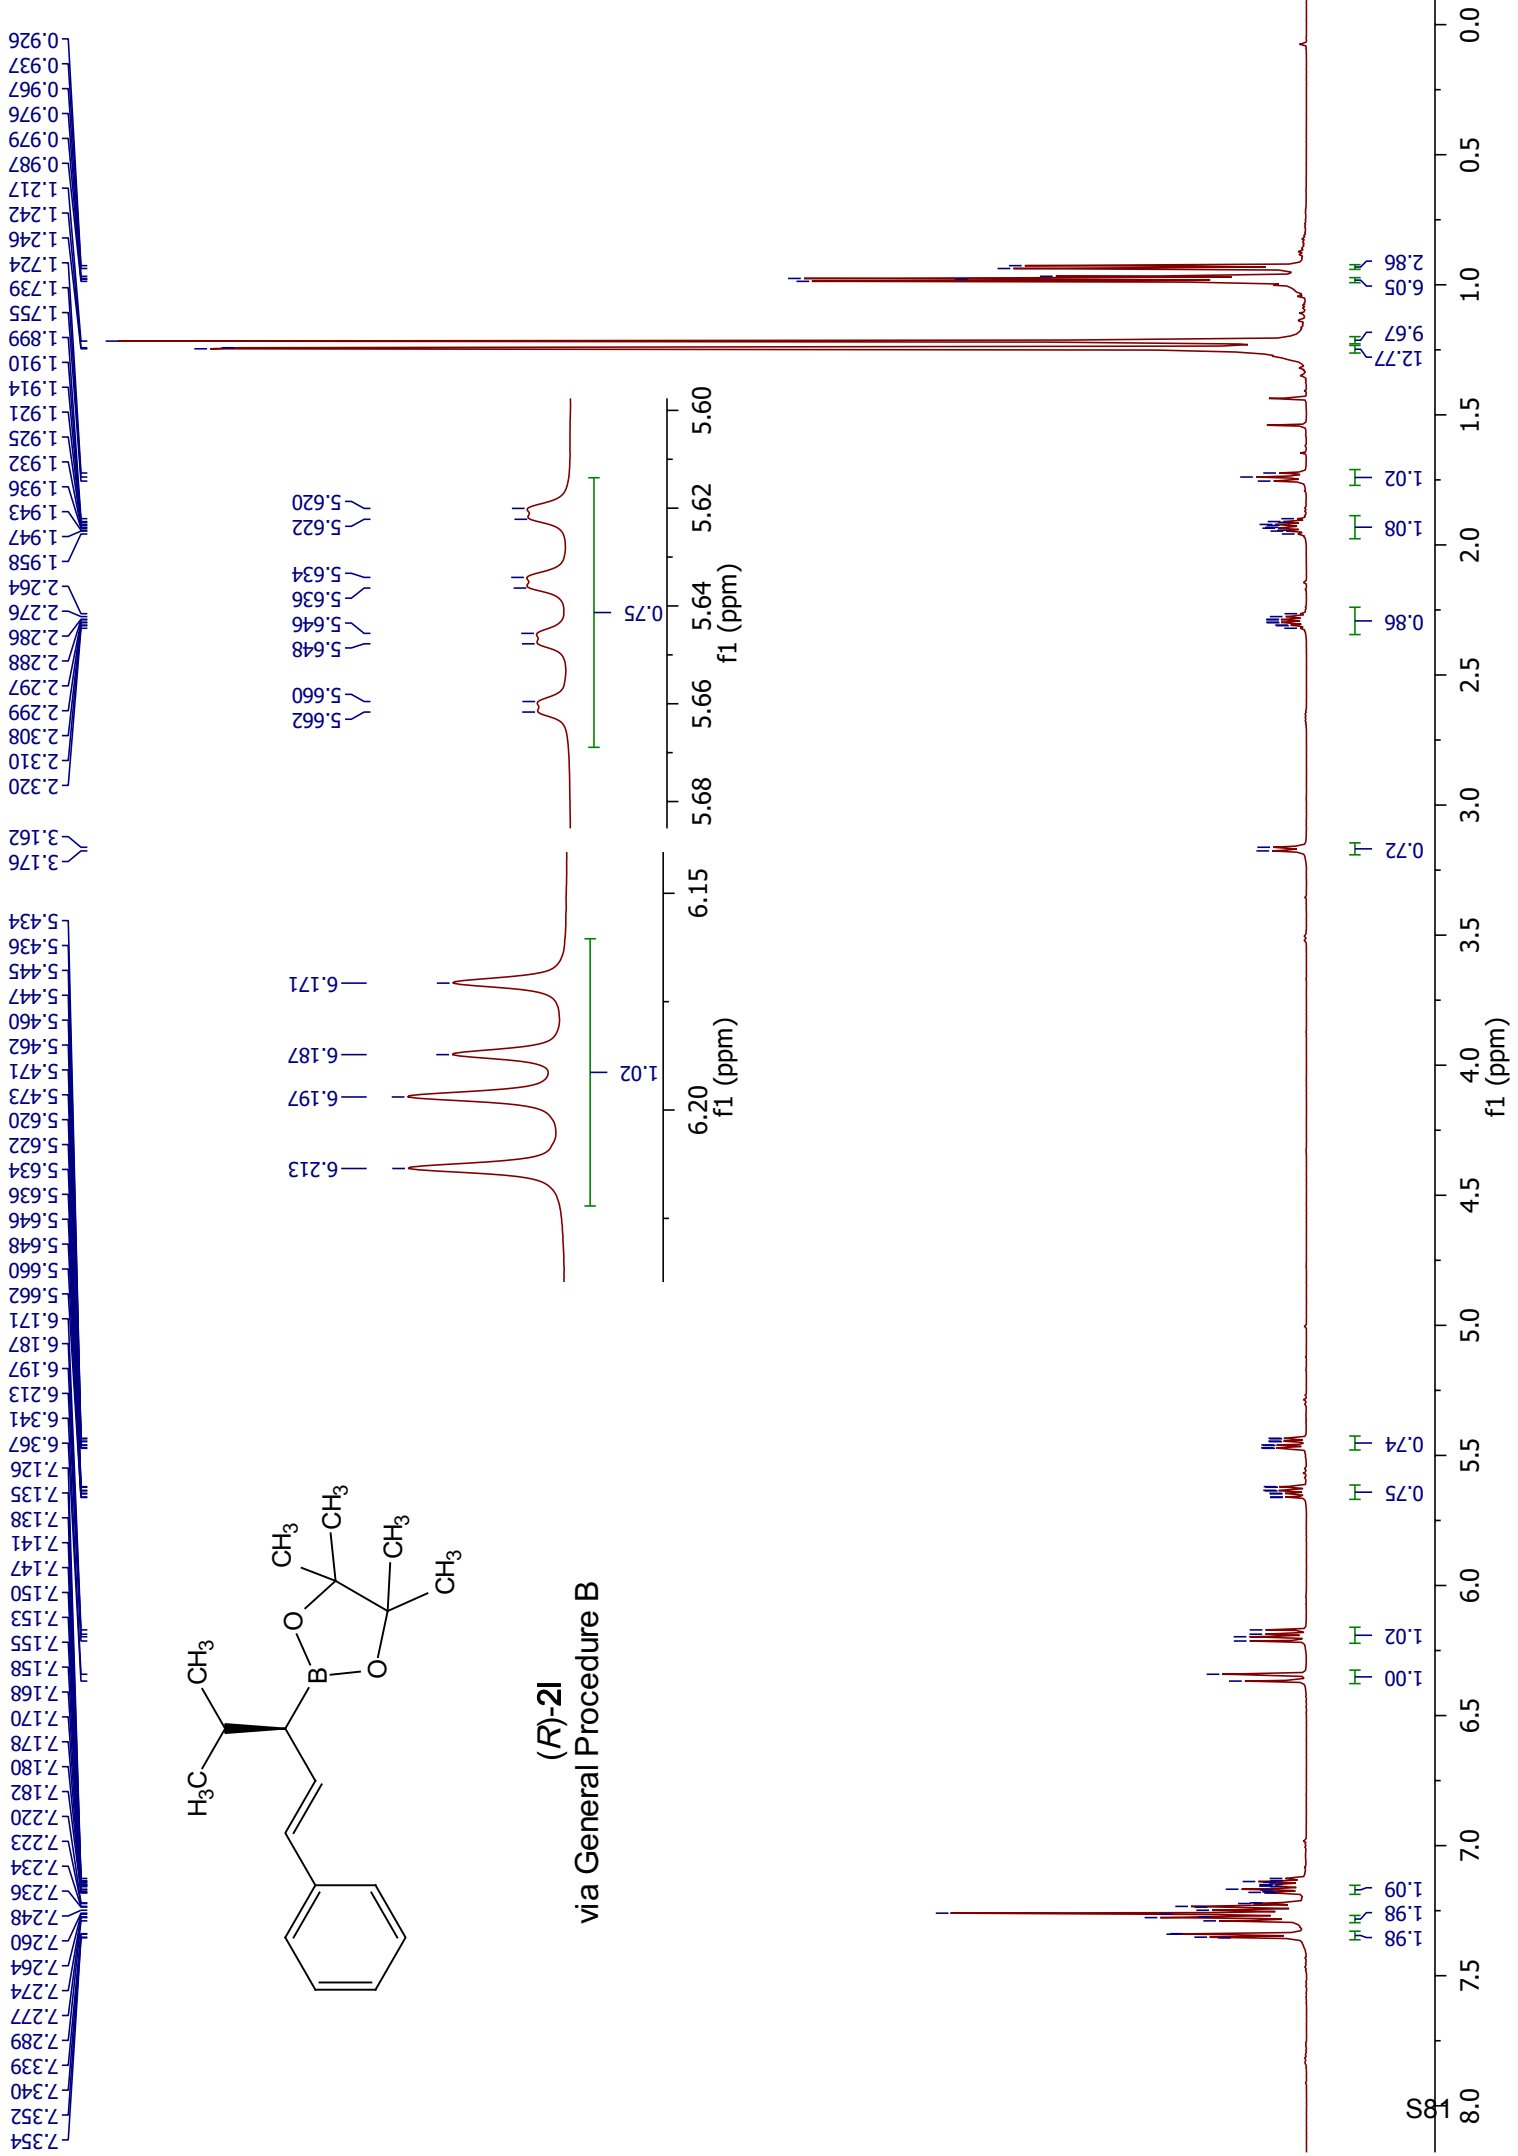

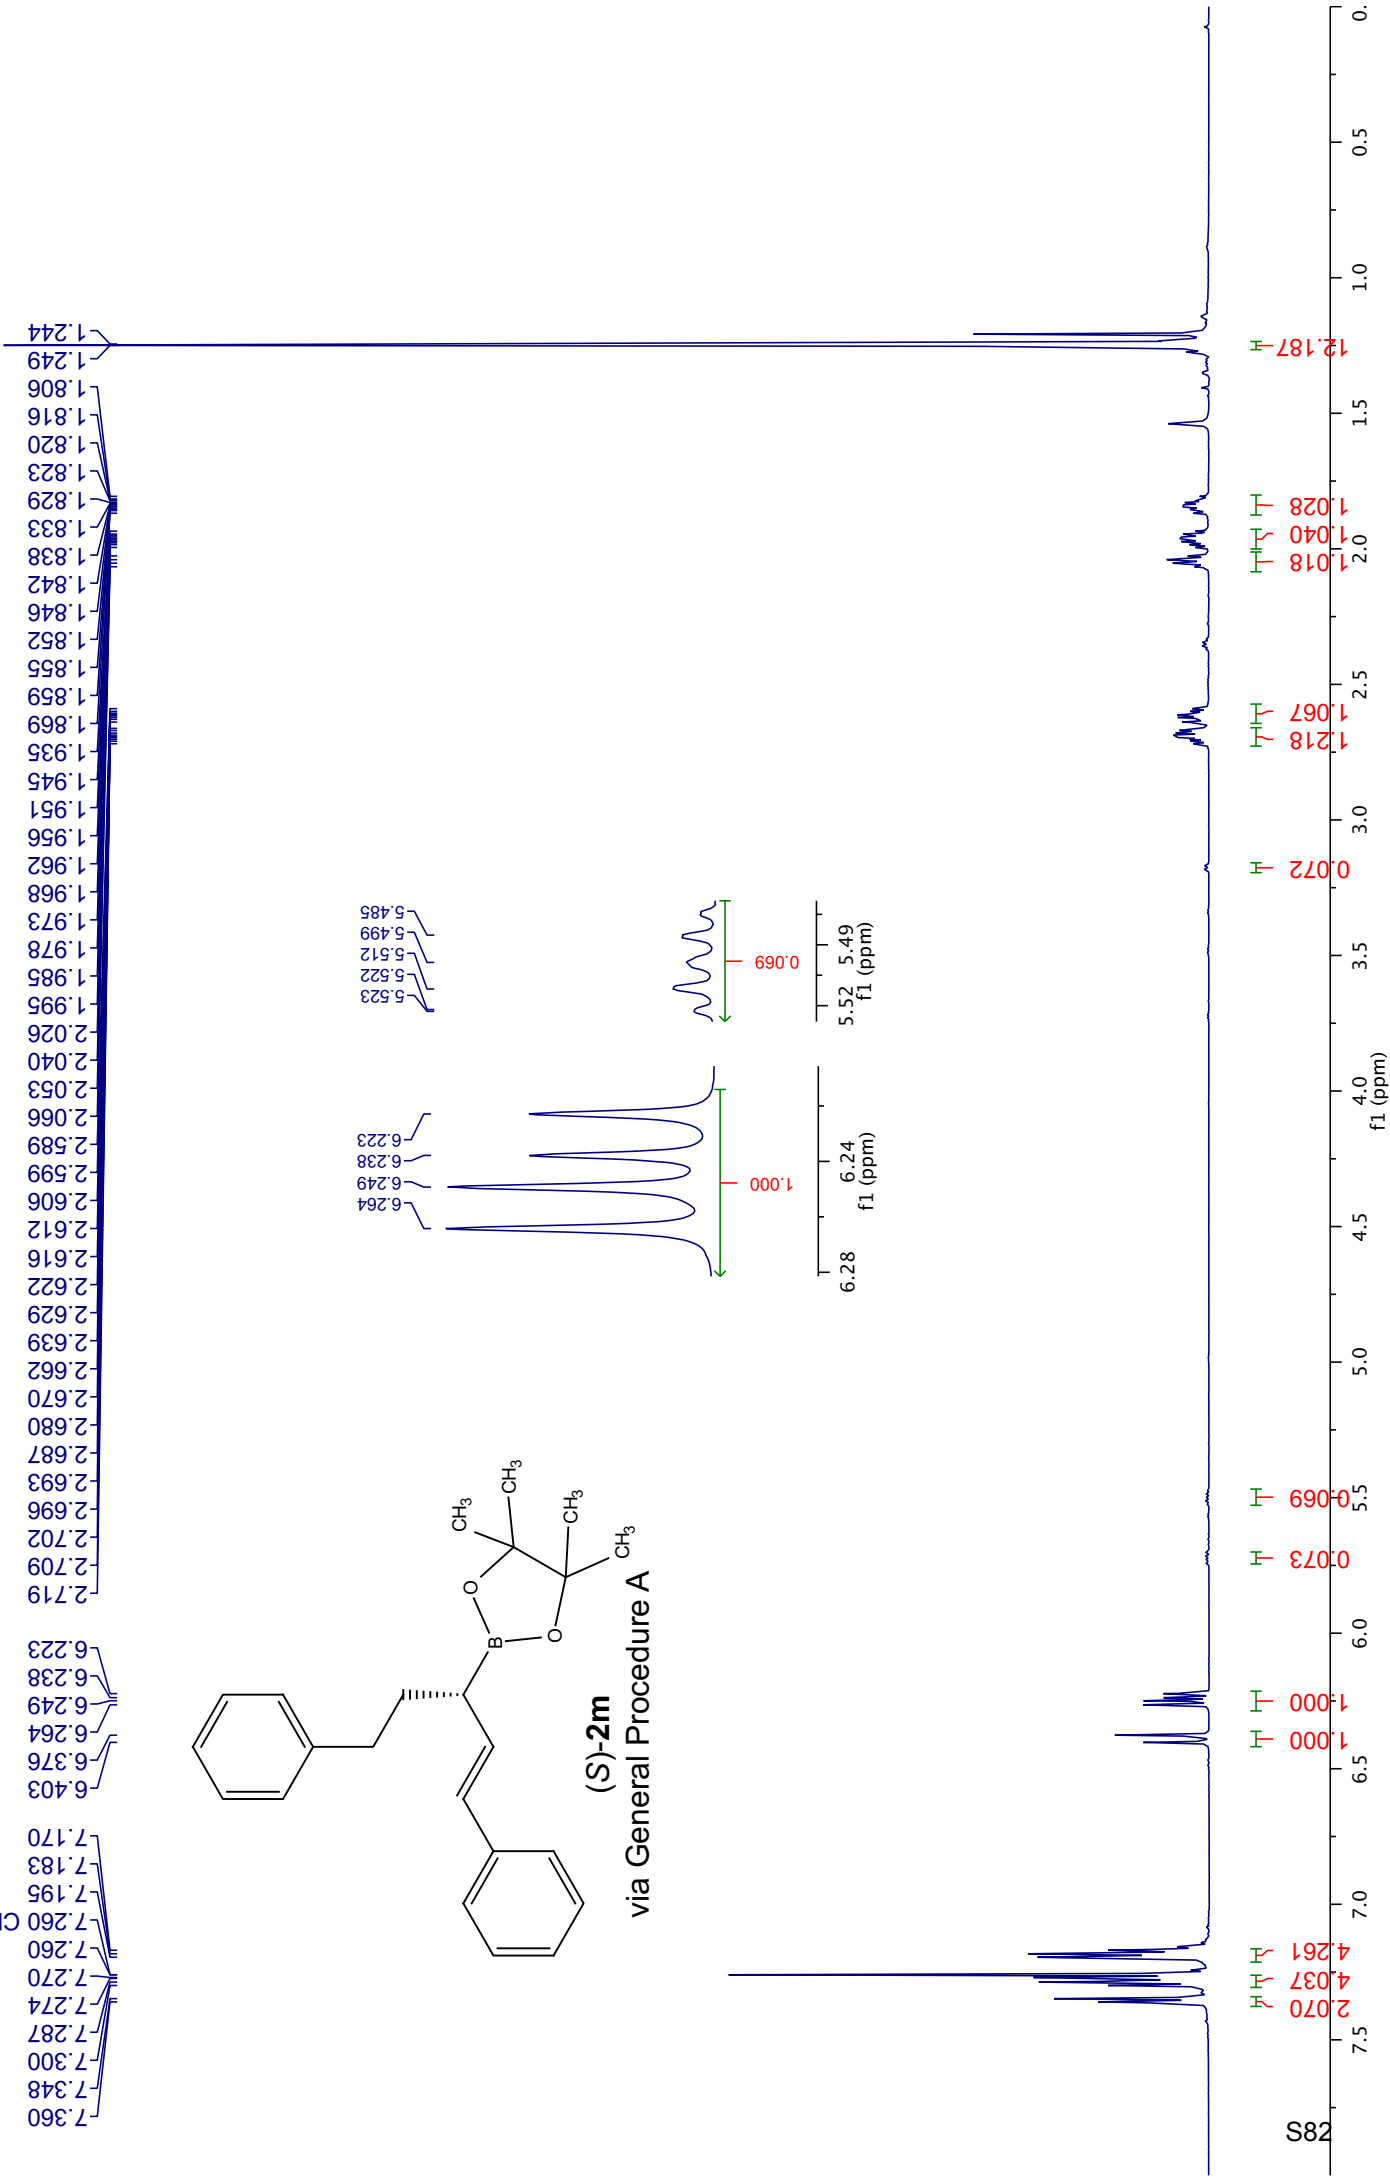

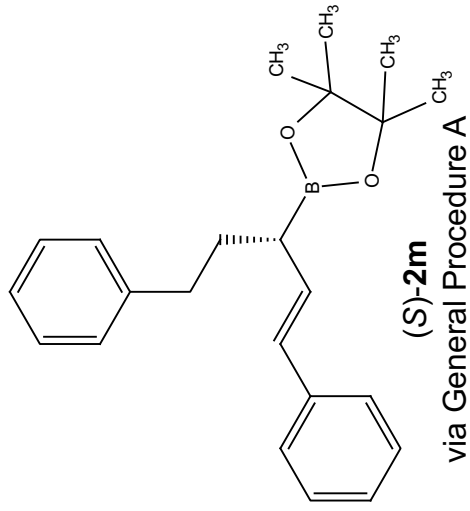

— 35.55  
— 32.828  
— 24.947  
— 24.789

— 142.731  
— 138.310  
— 131.599  
— 129.654  
— 128.673  
— 128.560  
— 128.412  
— 126.751  
— 126.070  
— 125.800

— 83.486  
— 77.160 Chloroform-d

QZ-6-231-1  
QZ-6-231-1  
qPROTON CDCl3 /opt/nmr/data/qzhou 55  
Chrom-d

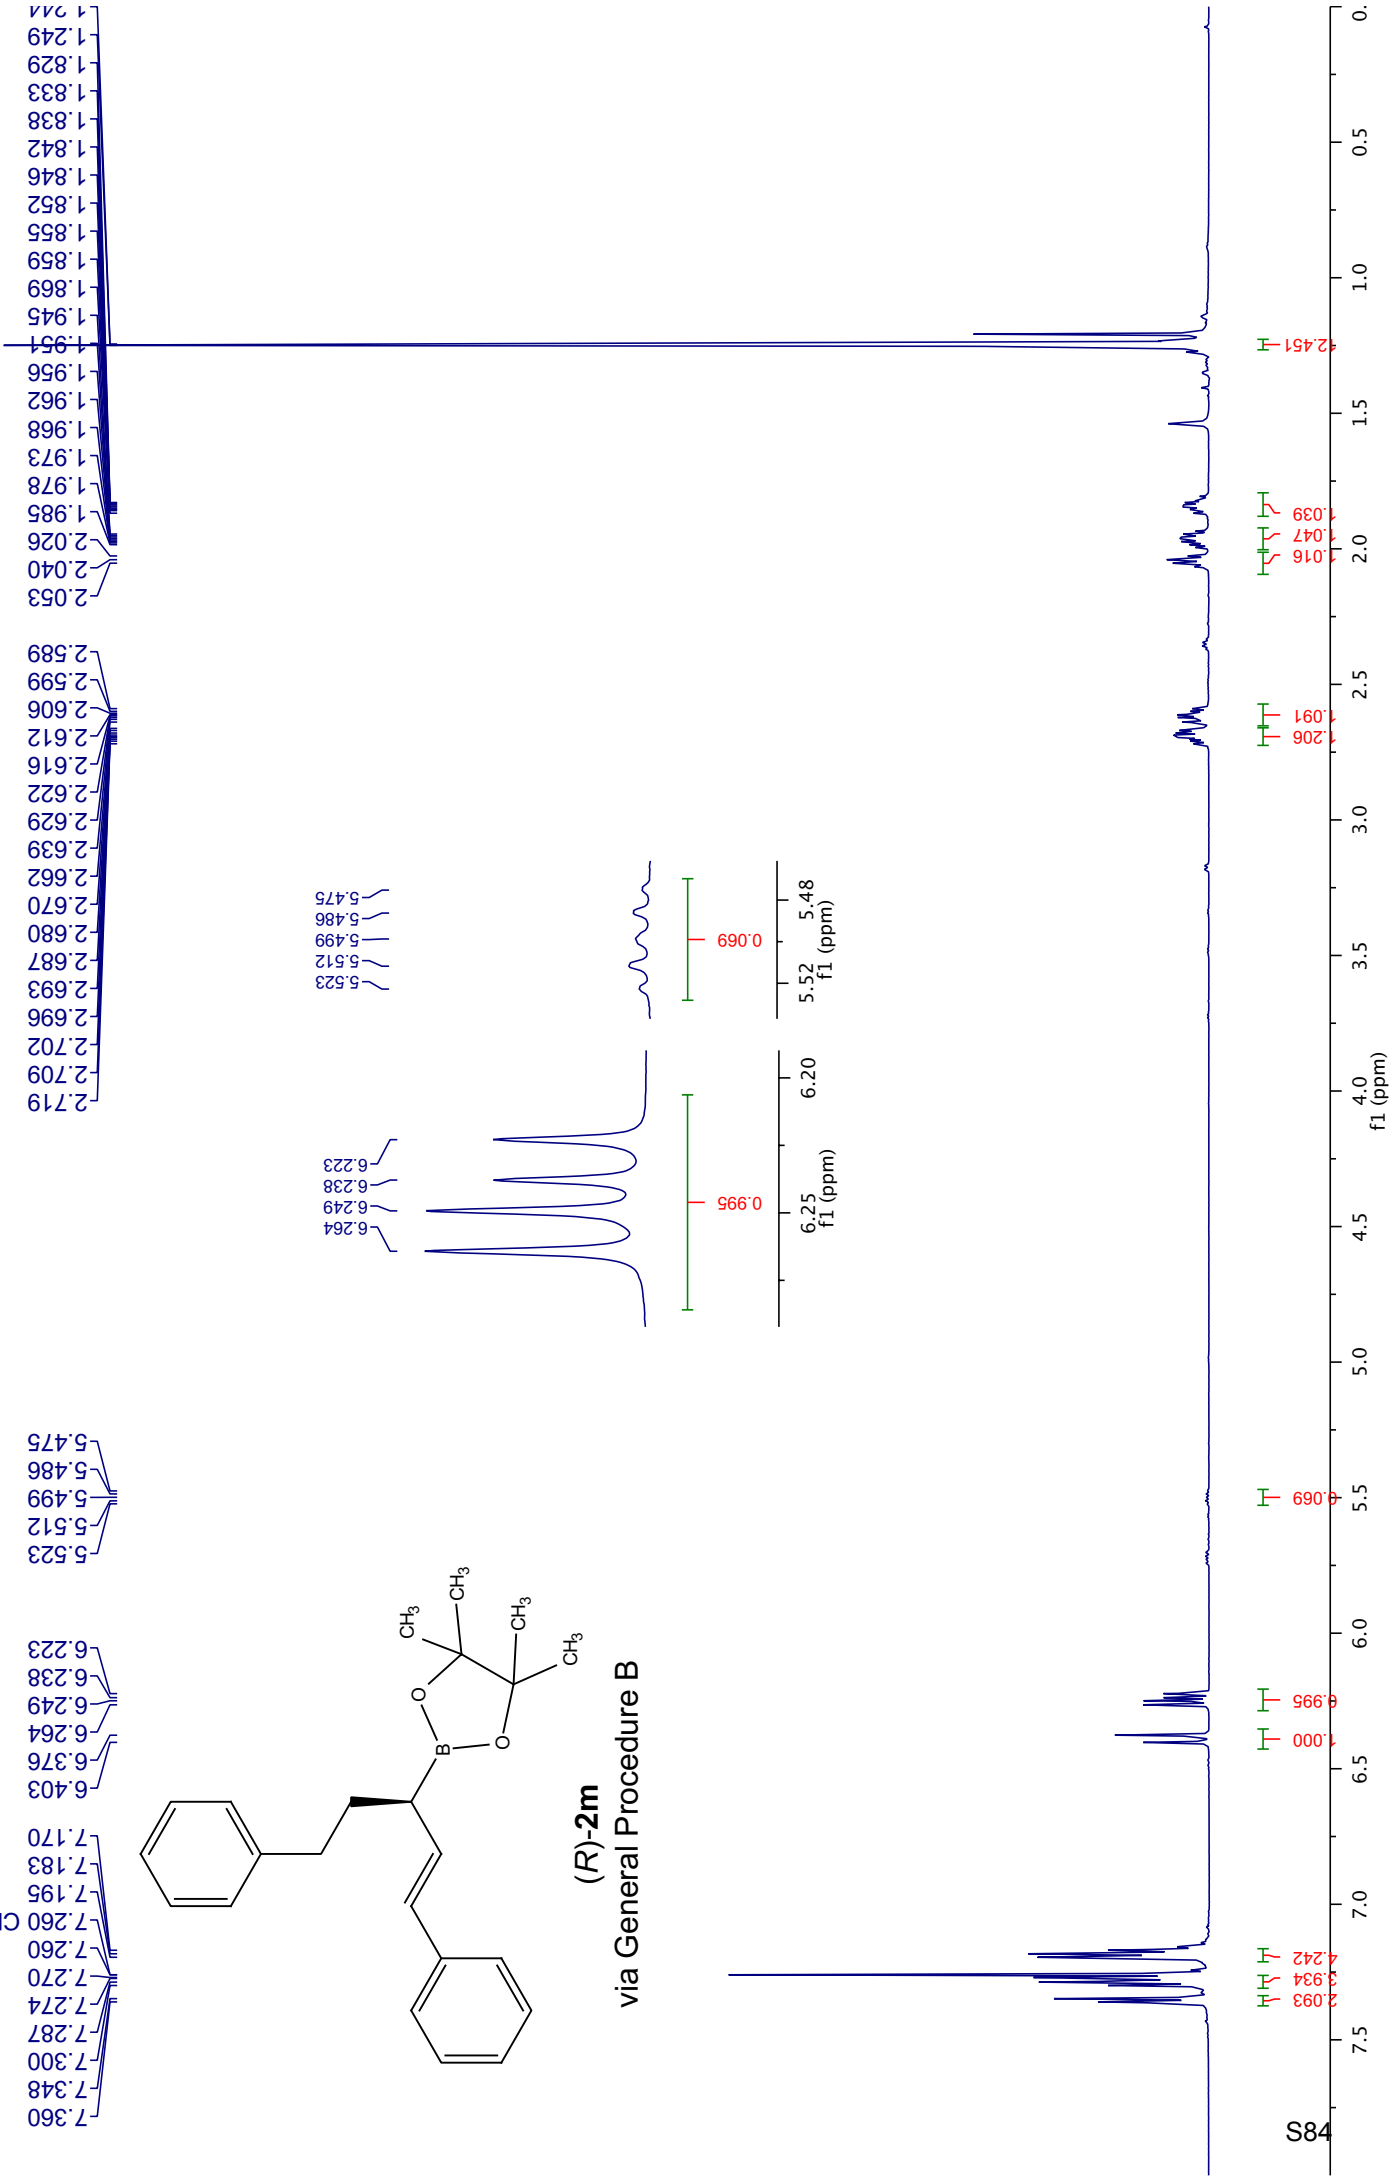

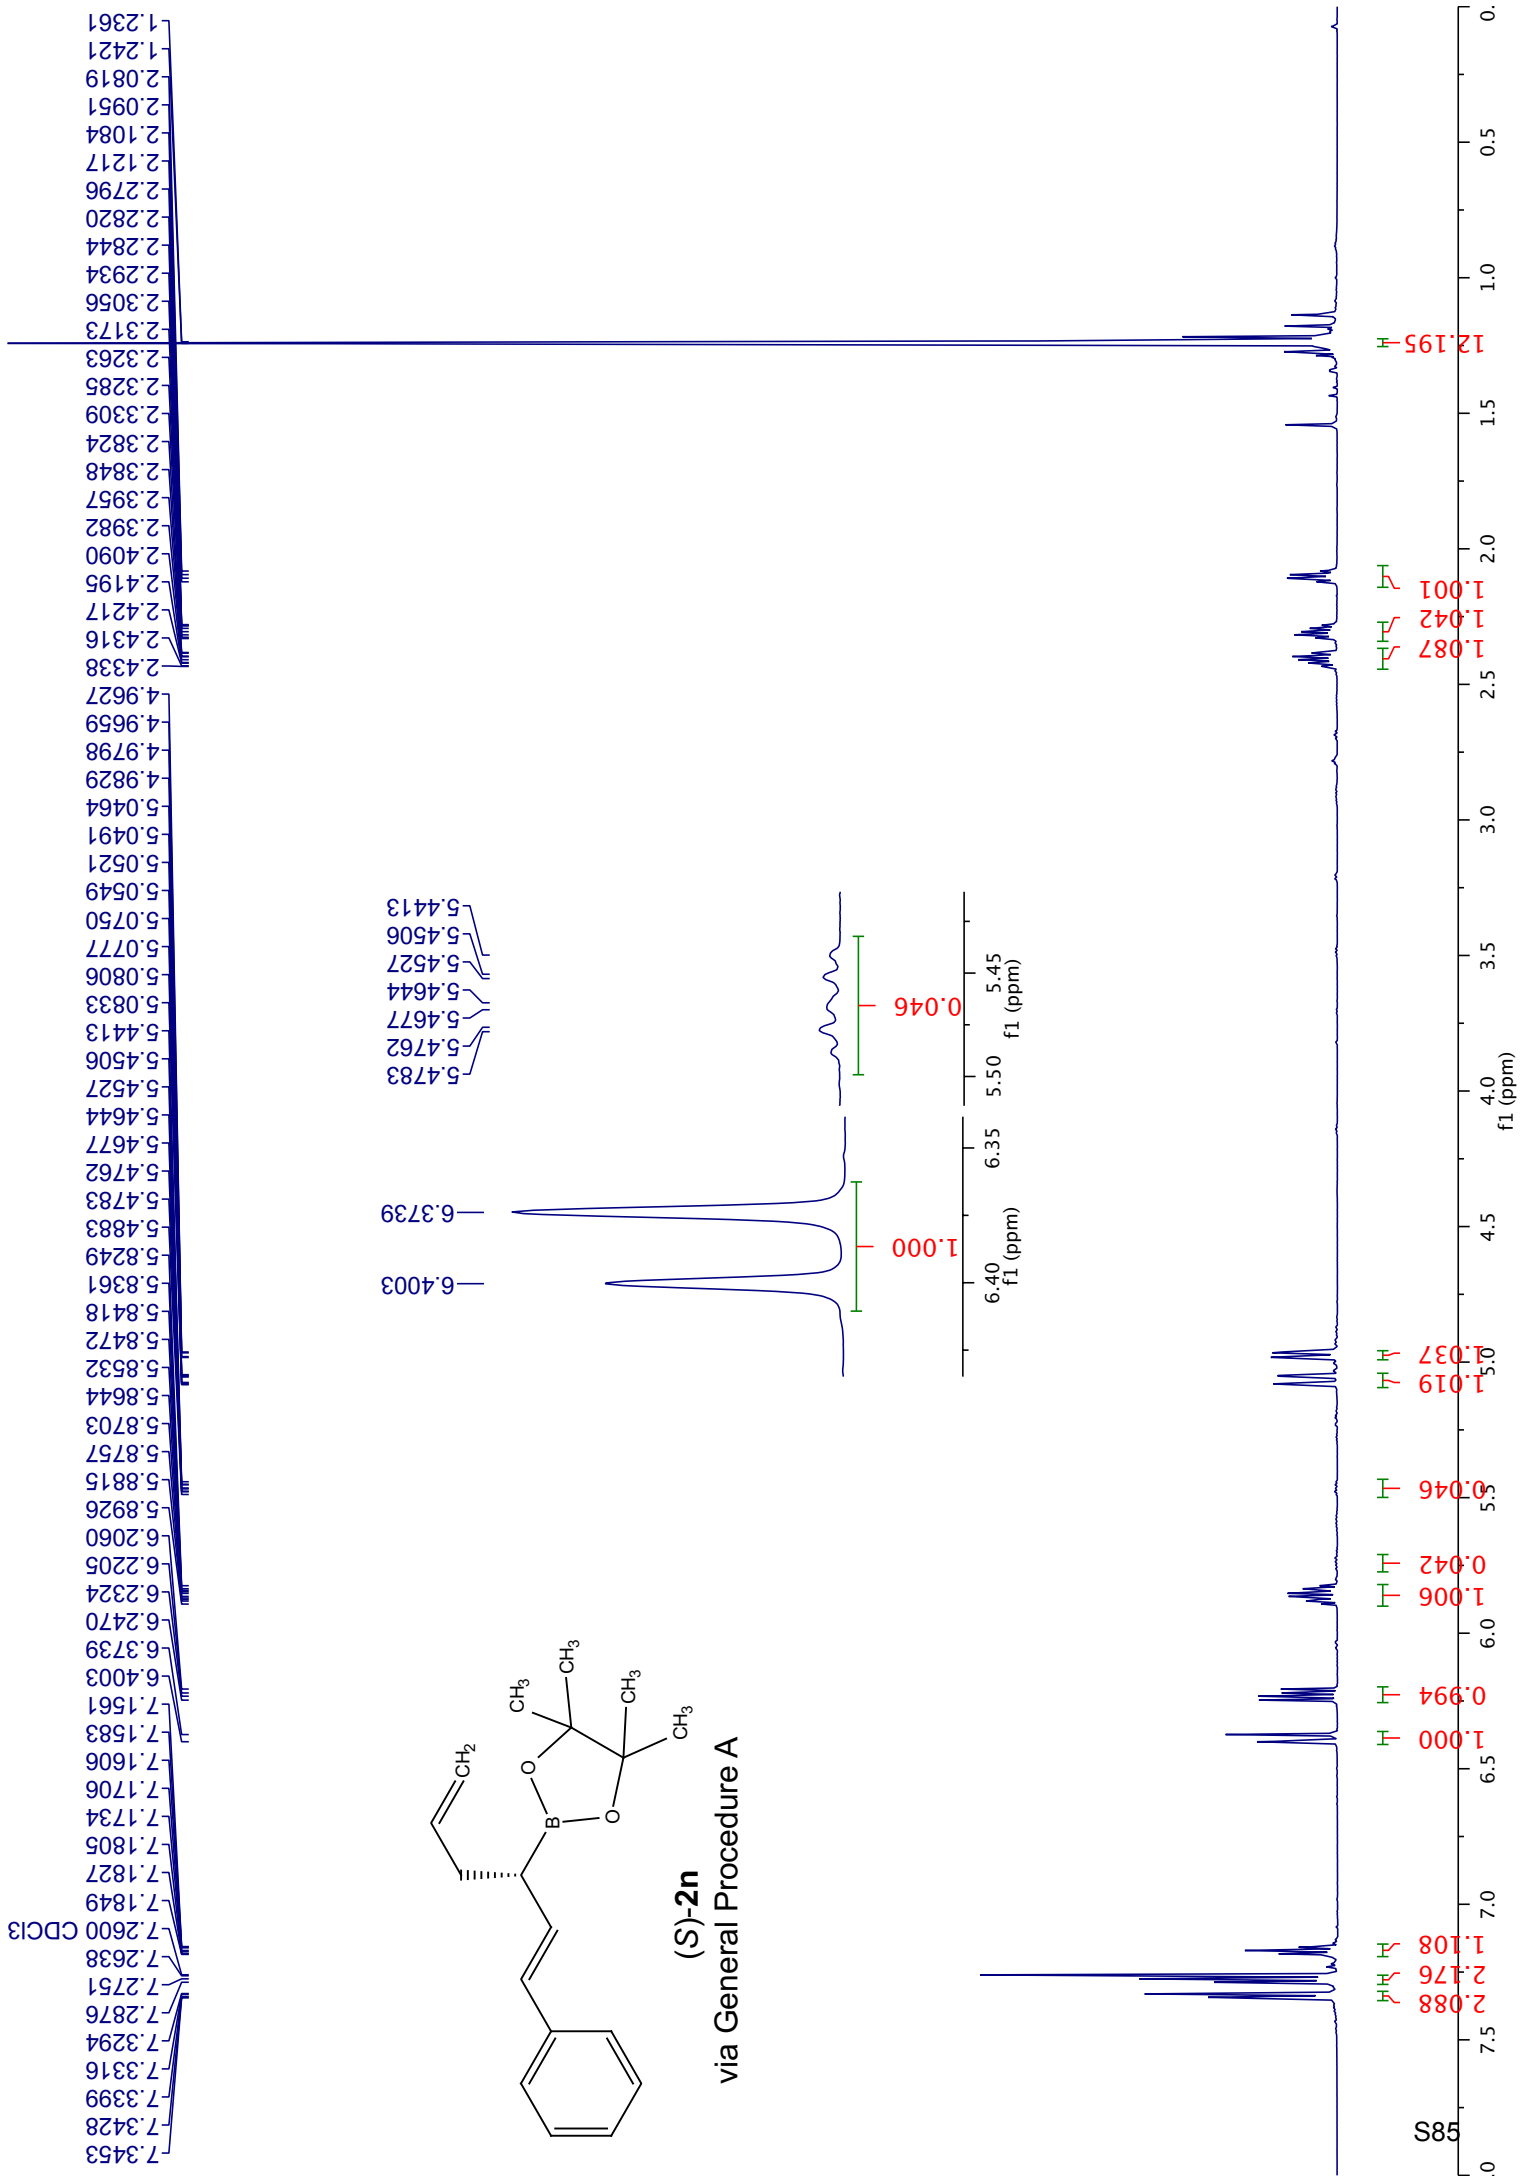

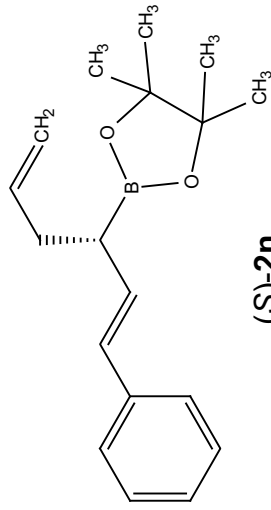

(S)-2n

via General Procedure A

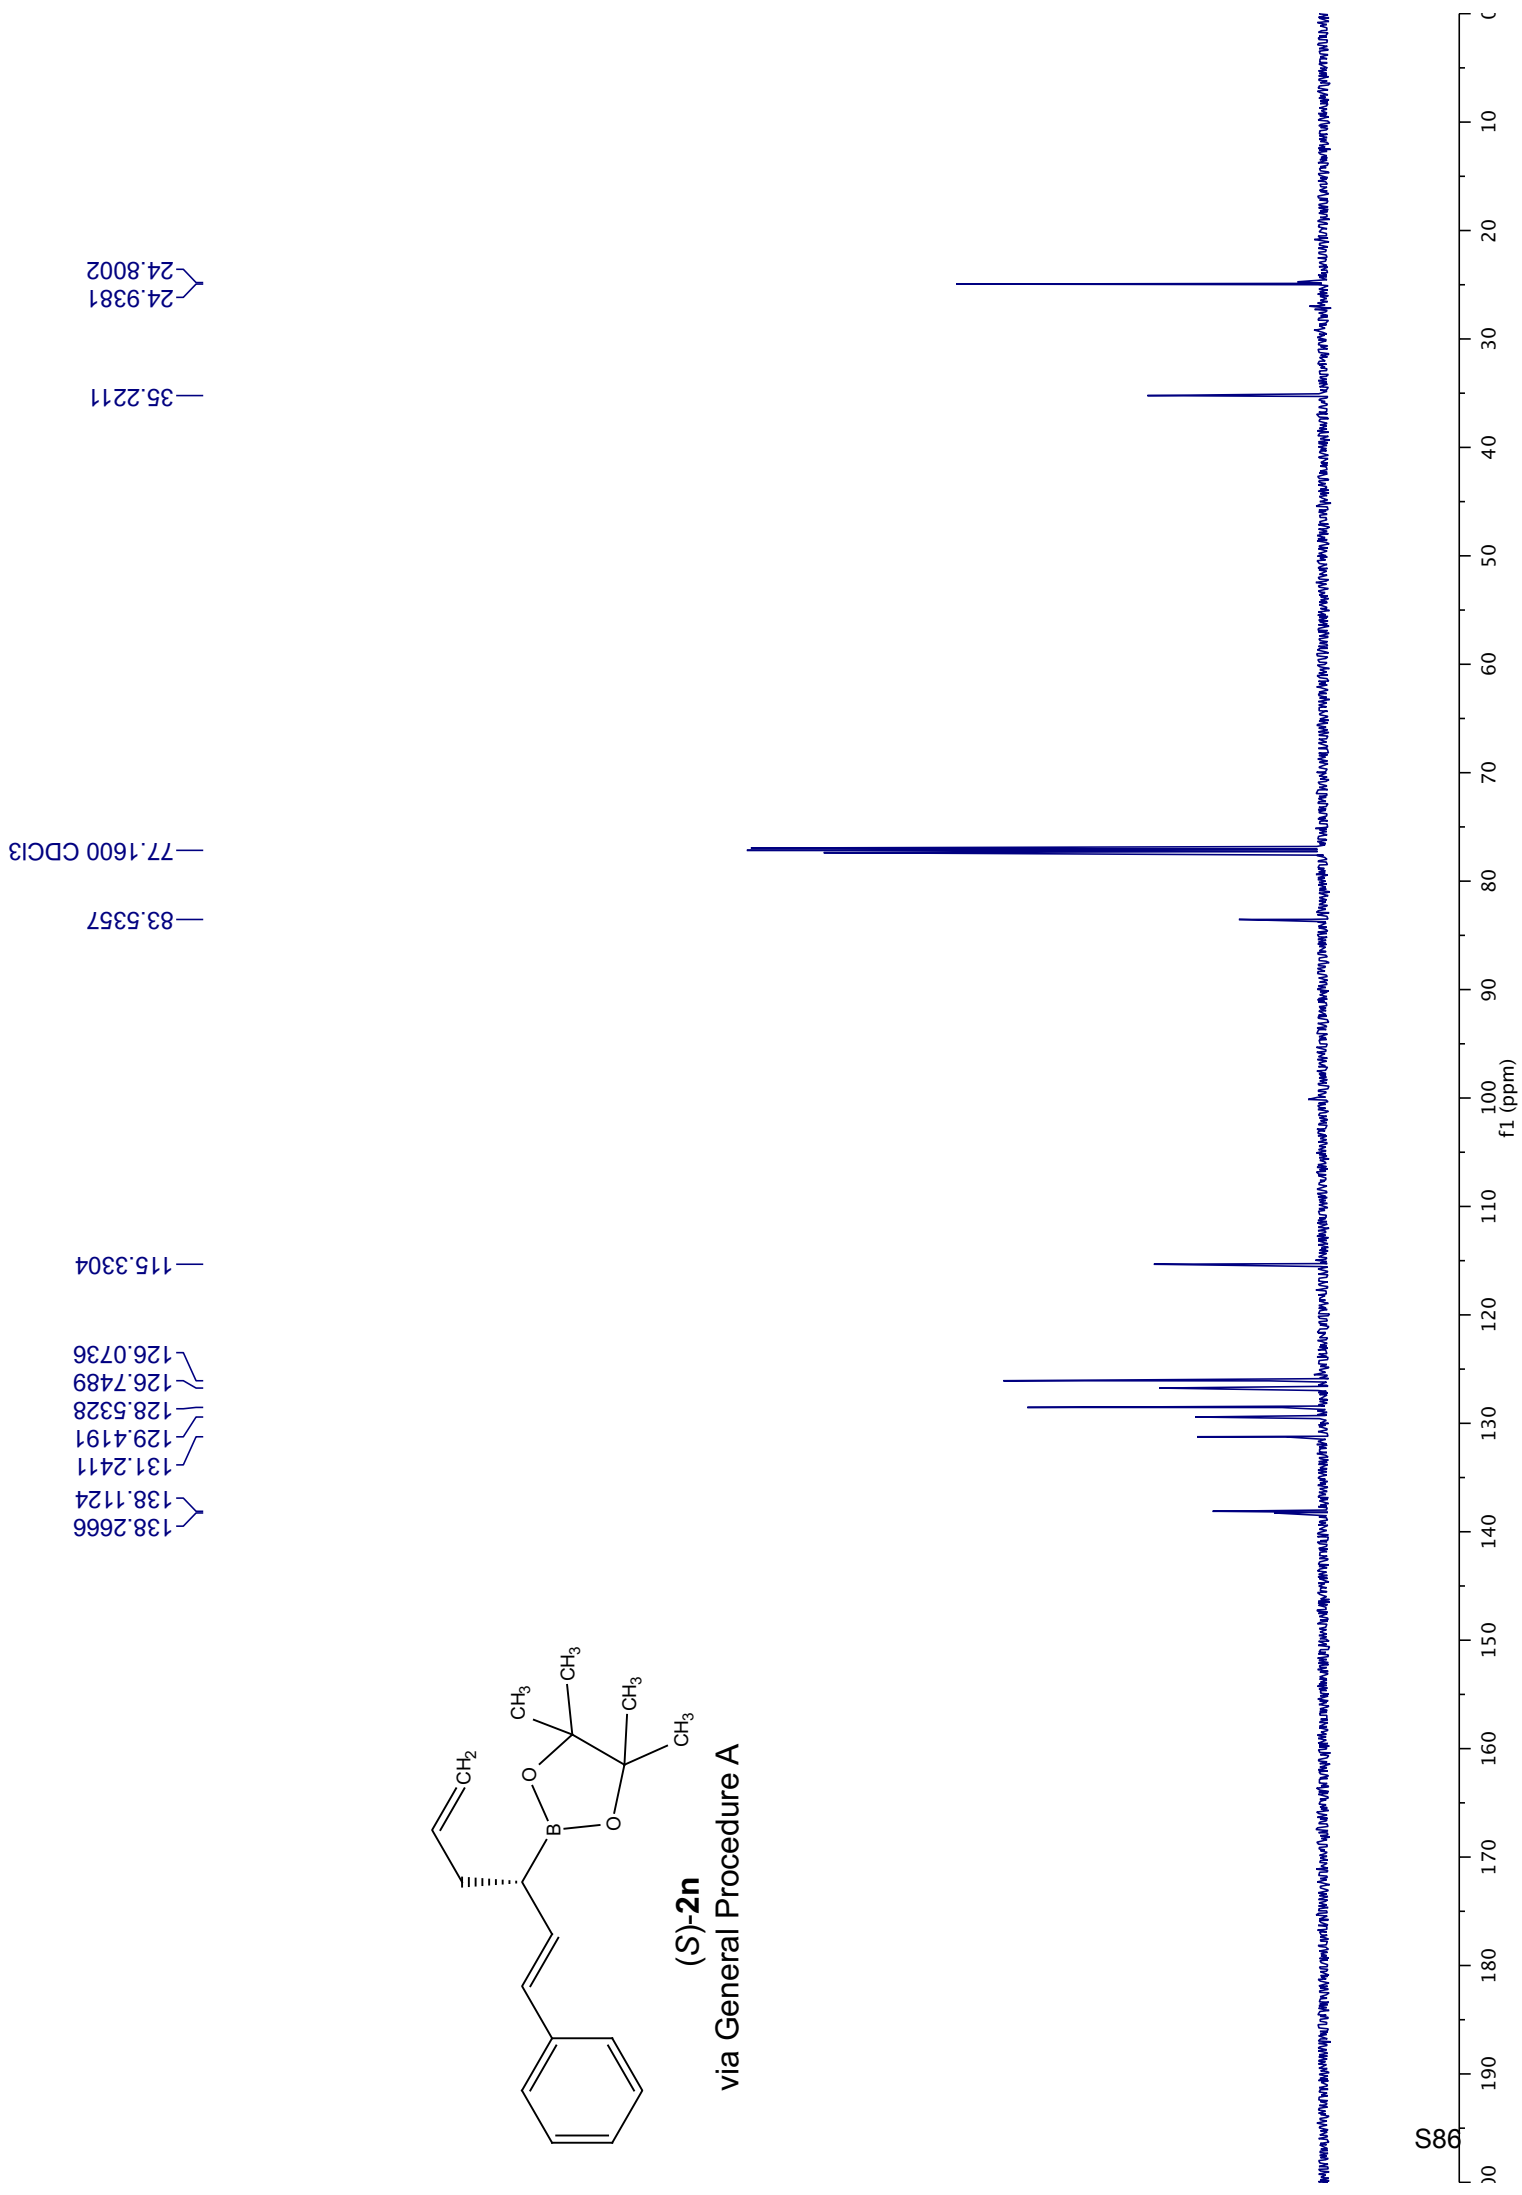

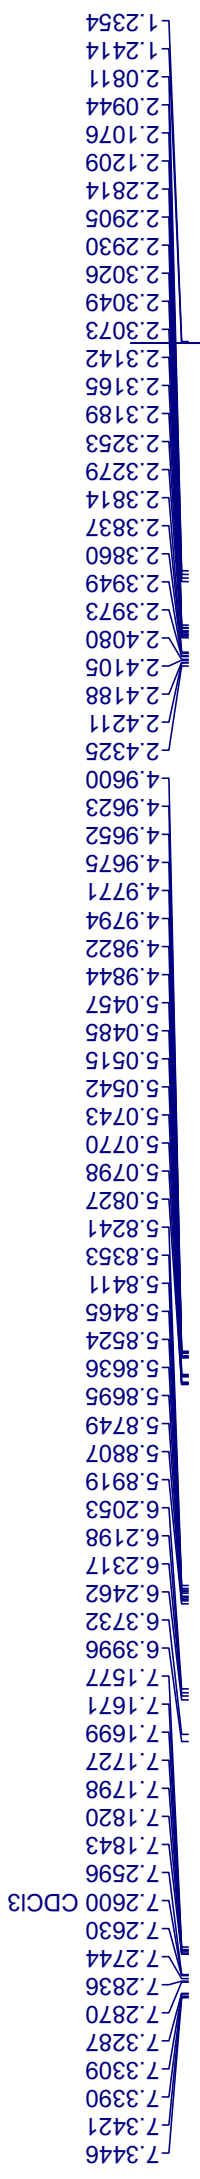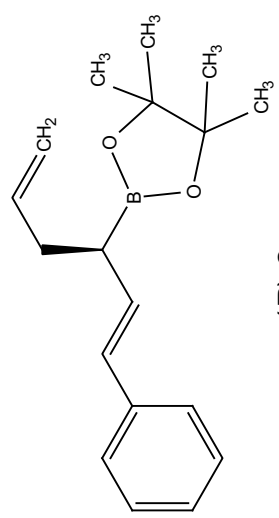

(R)-2n  
via General Procedure B

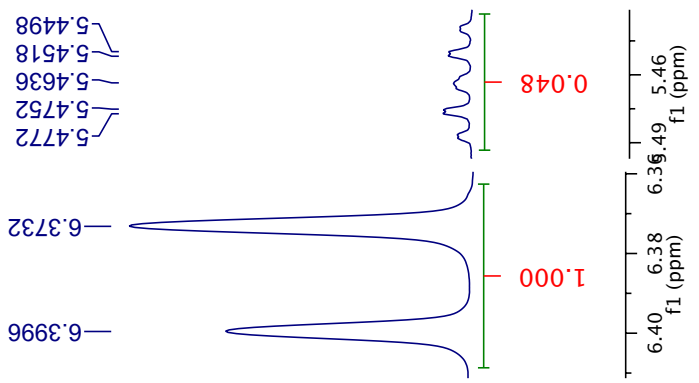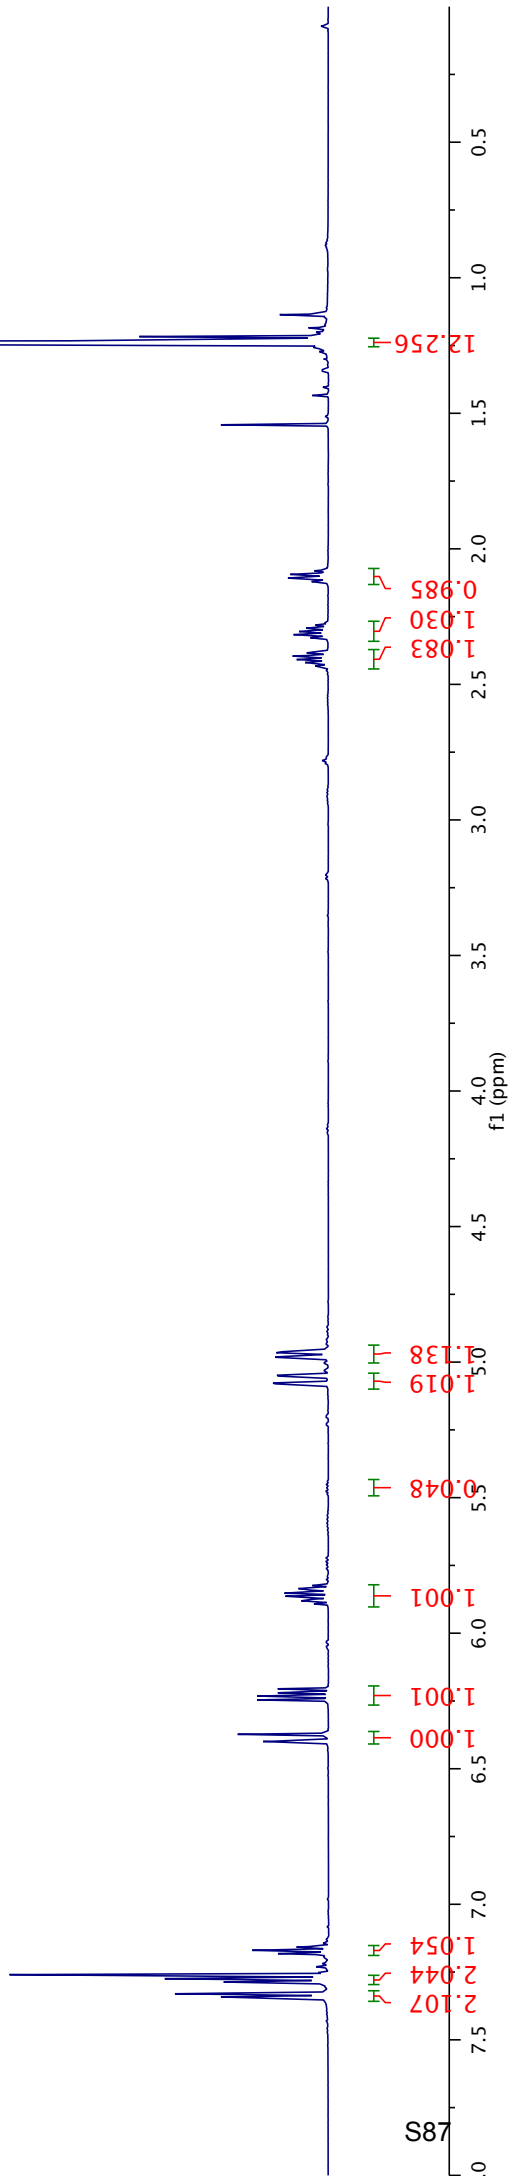

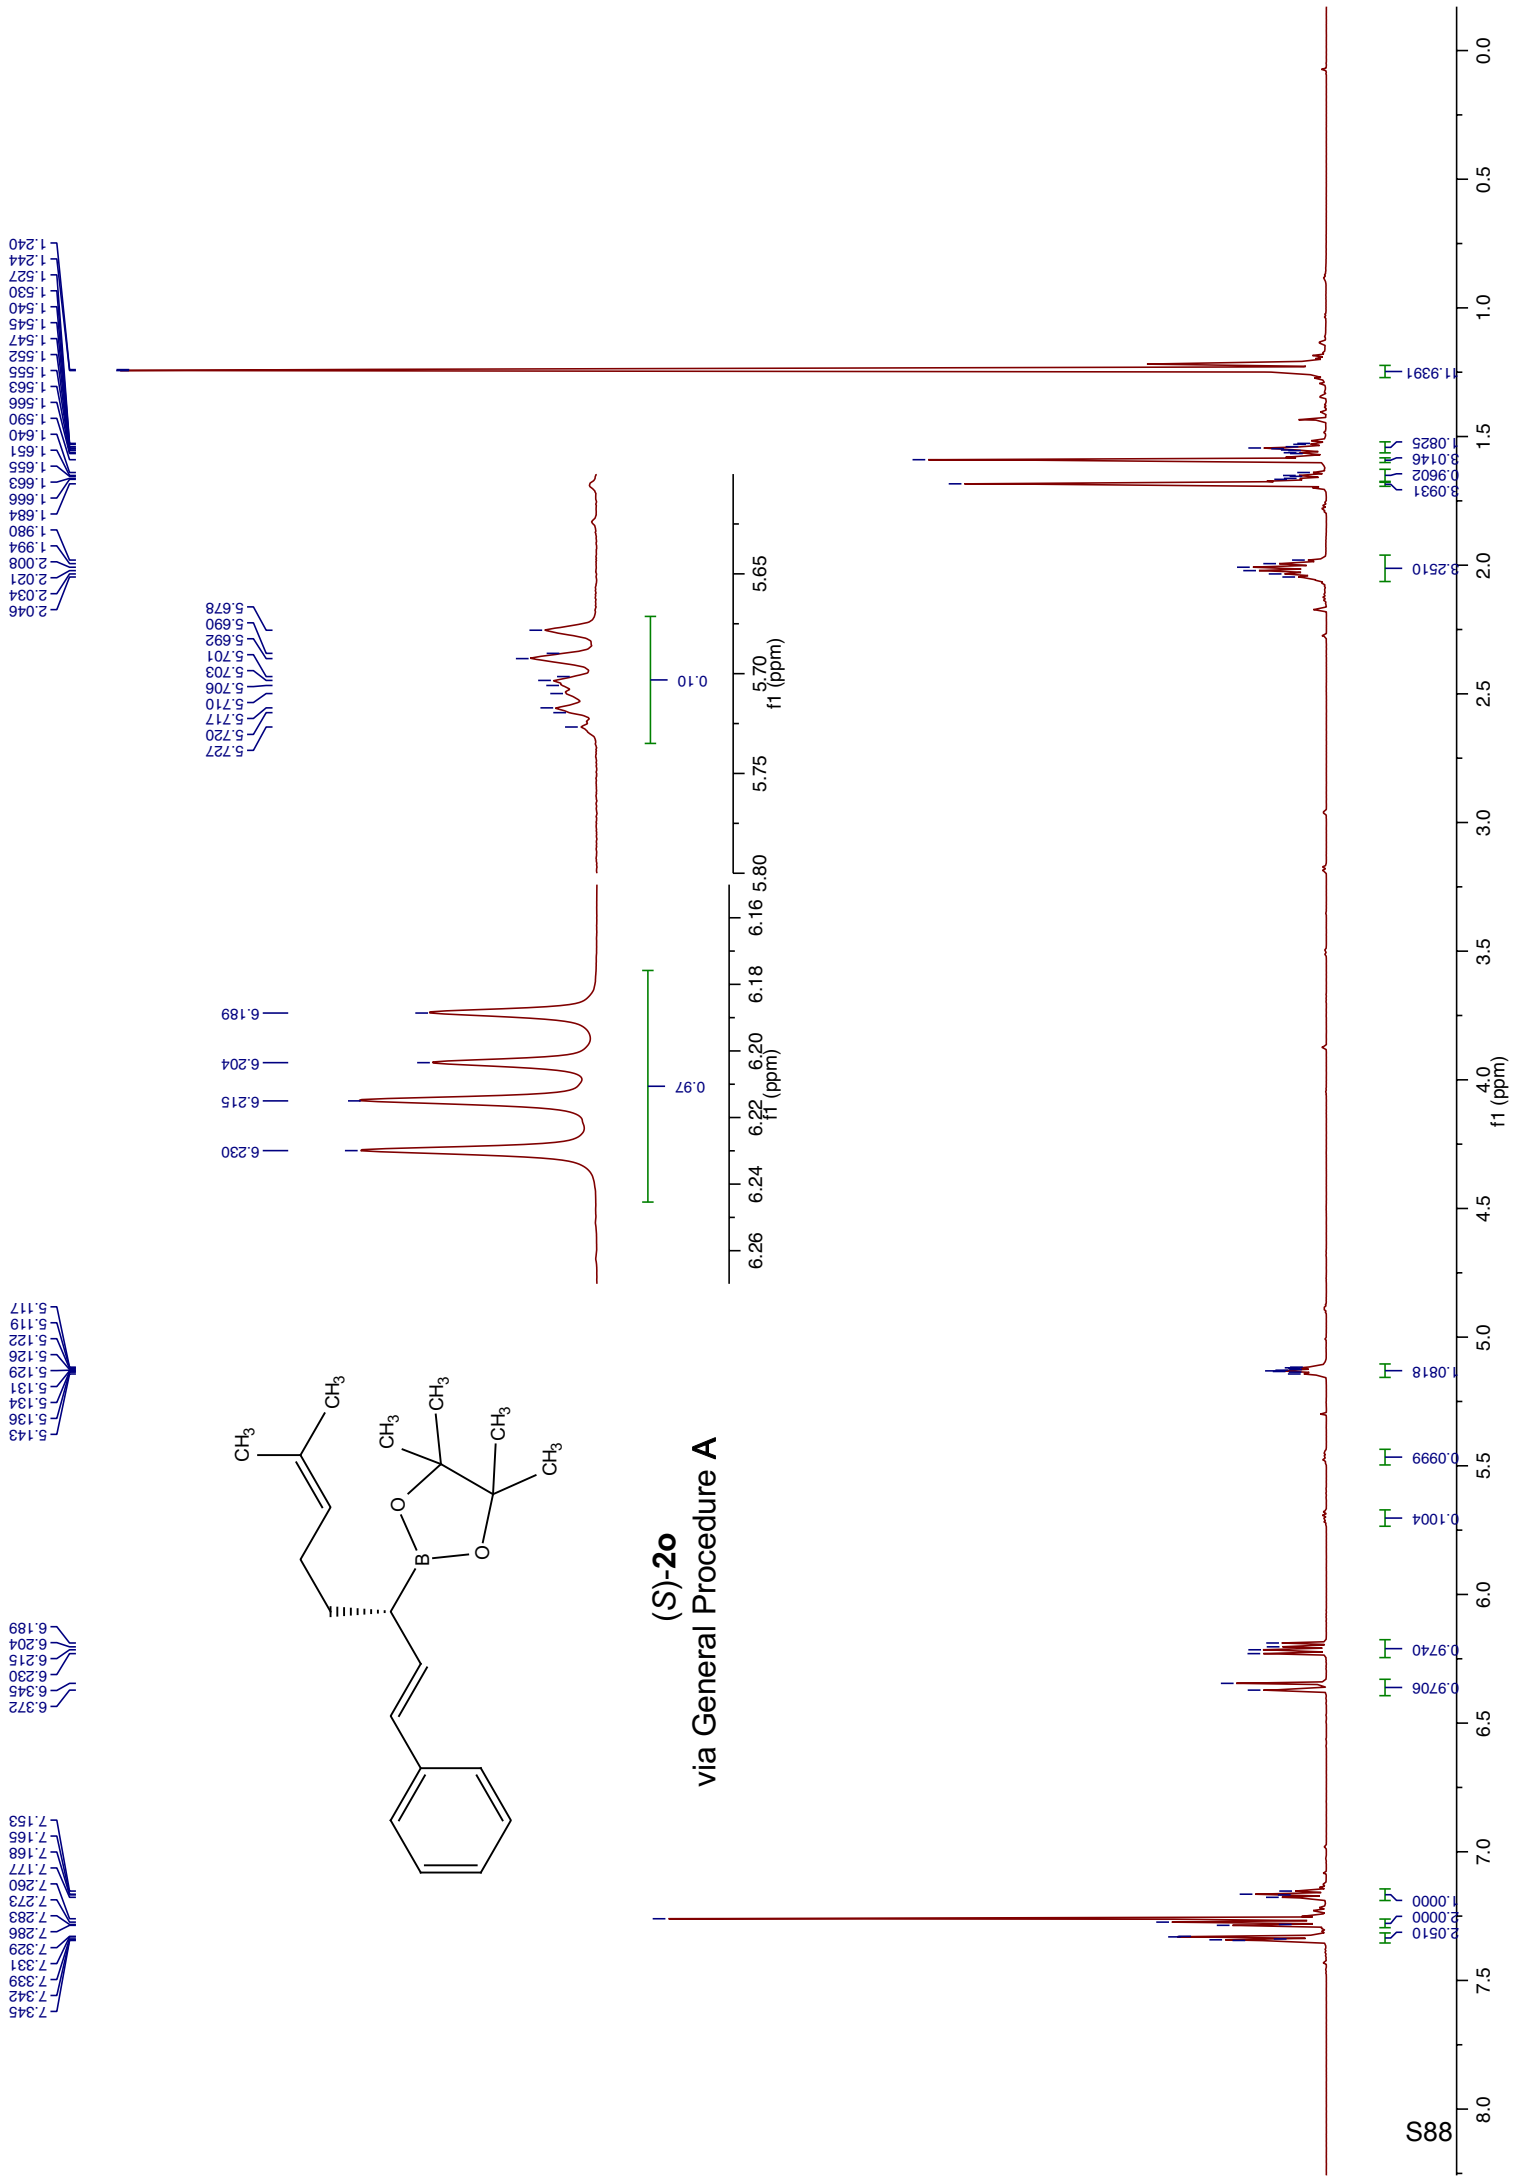



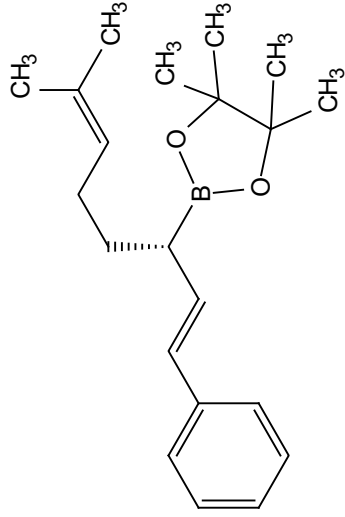

(S)-20  
via General Procedure A

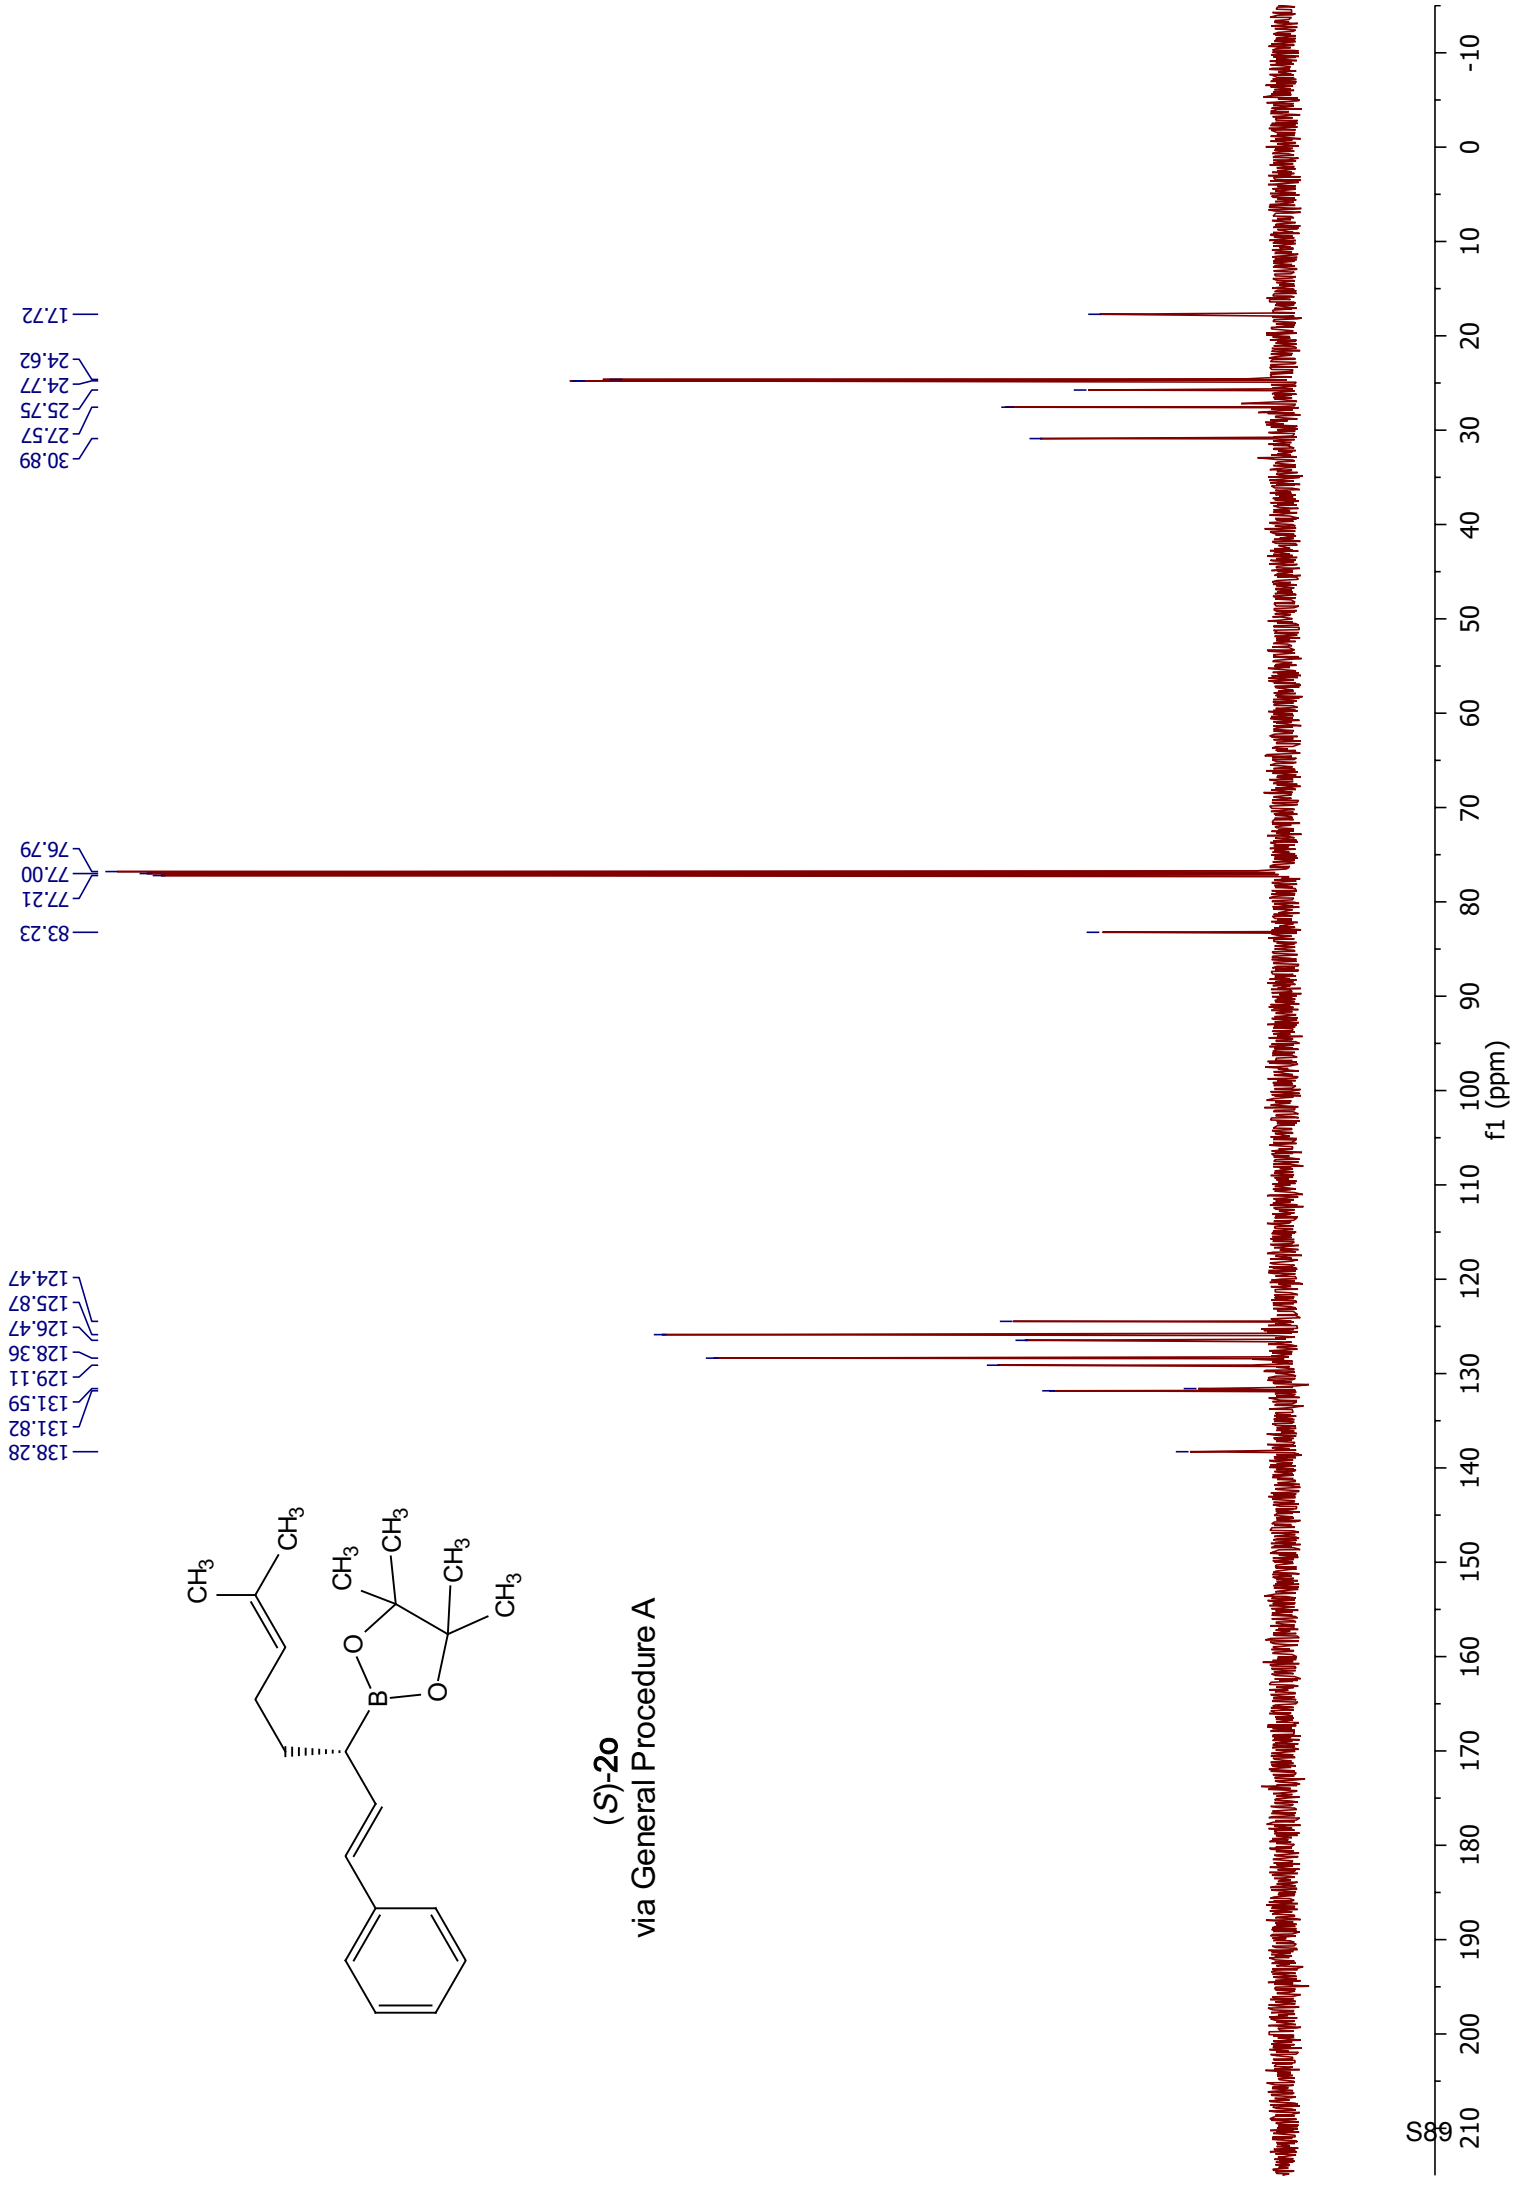

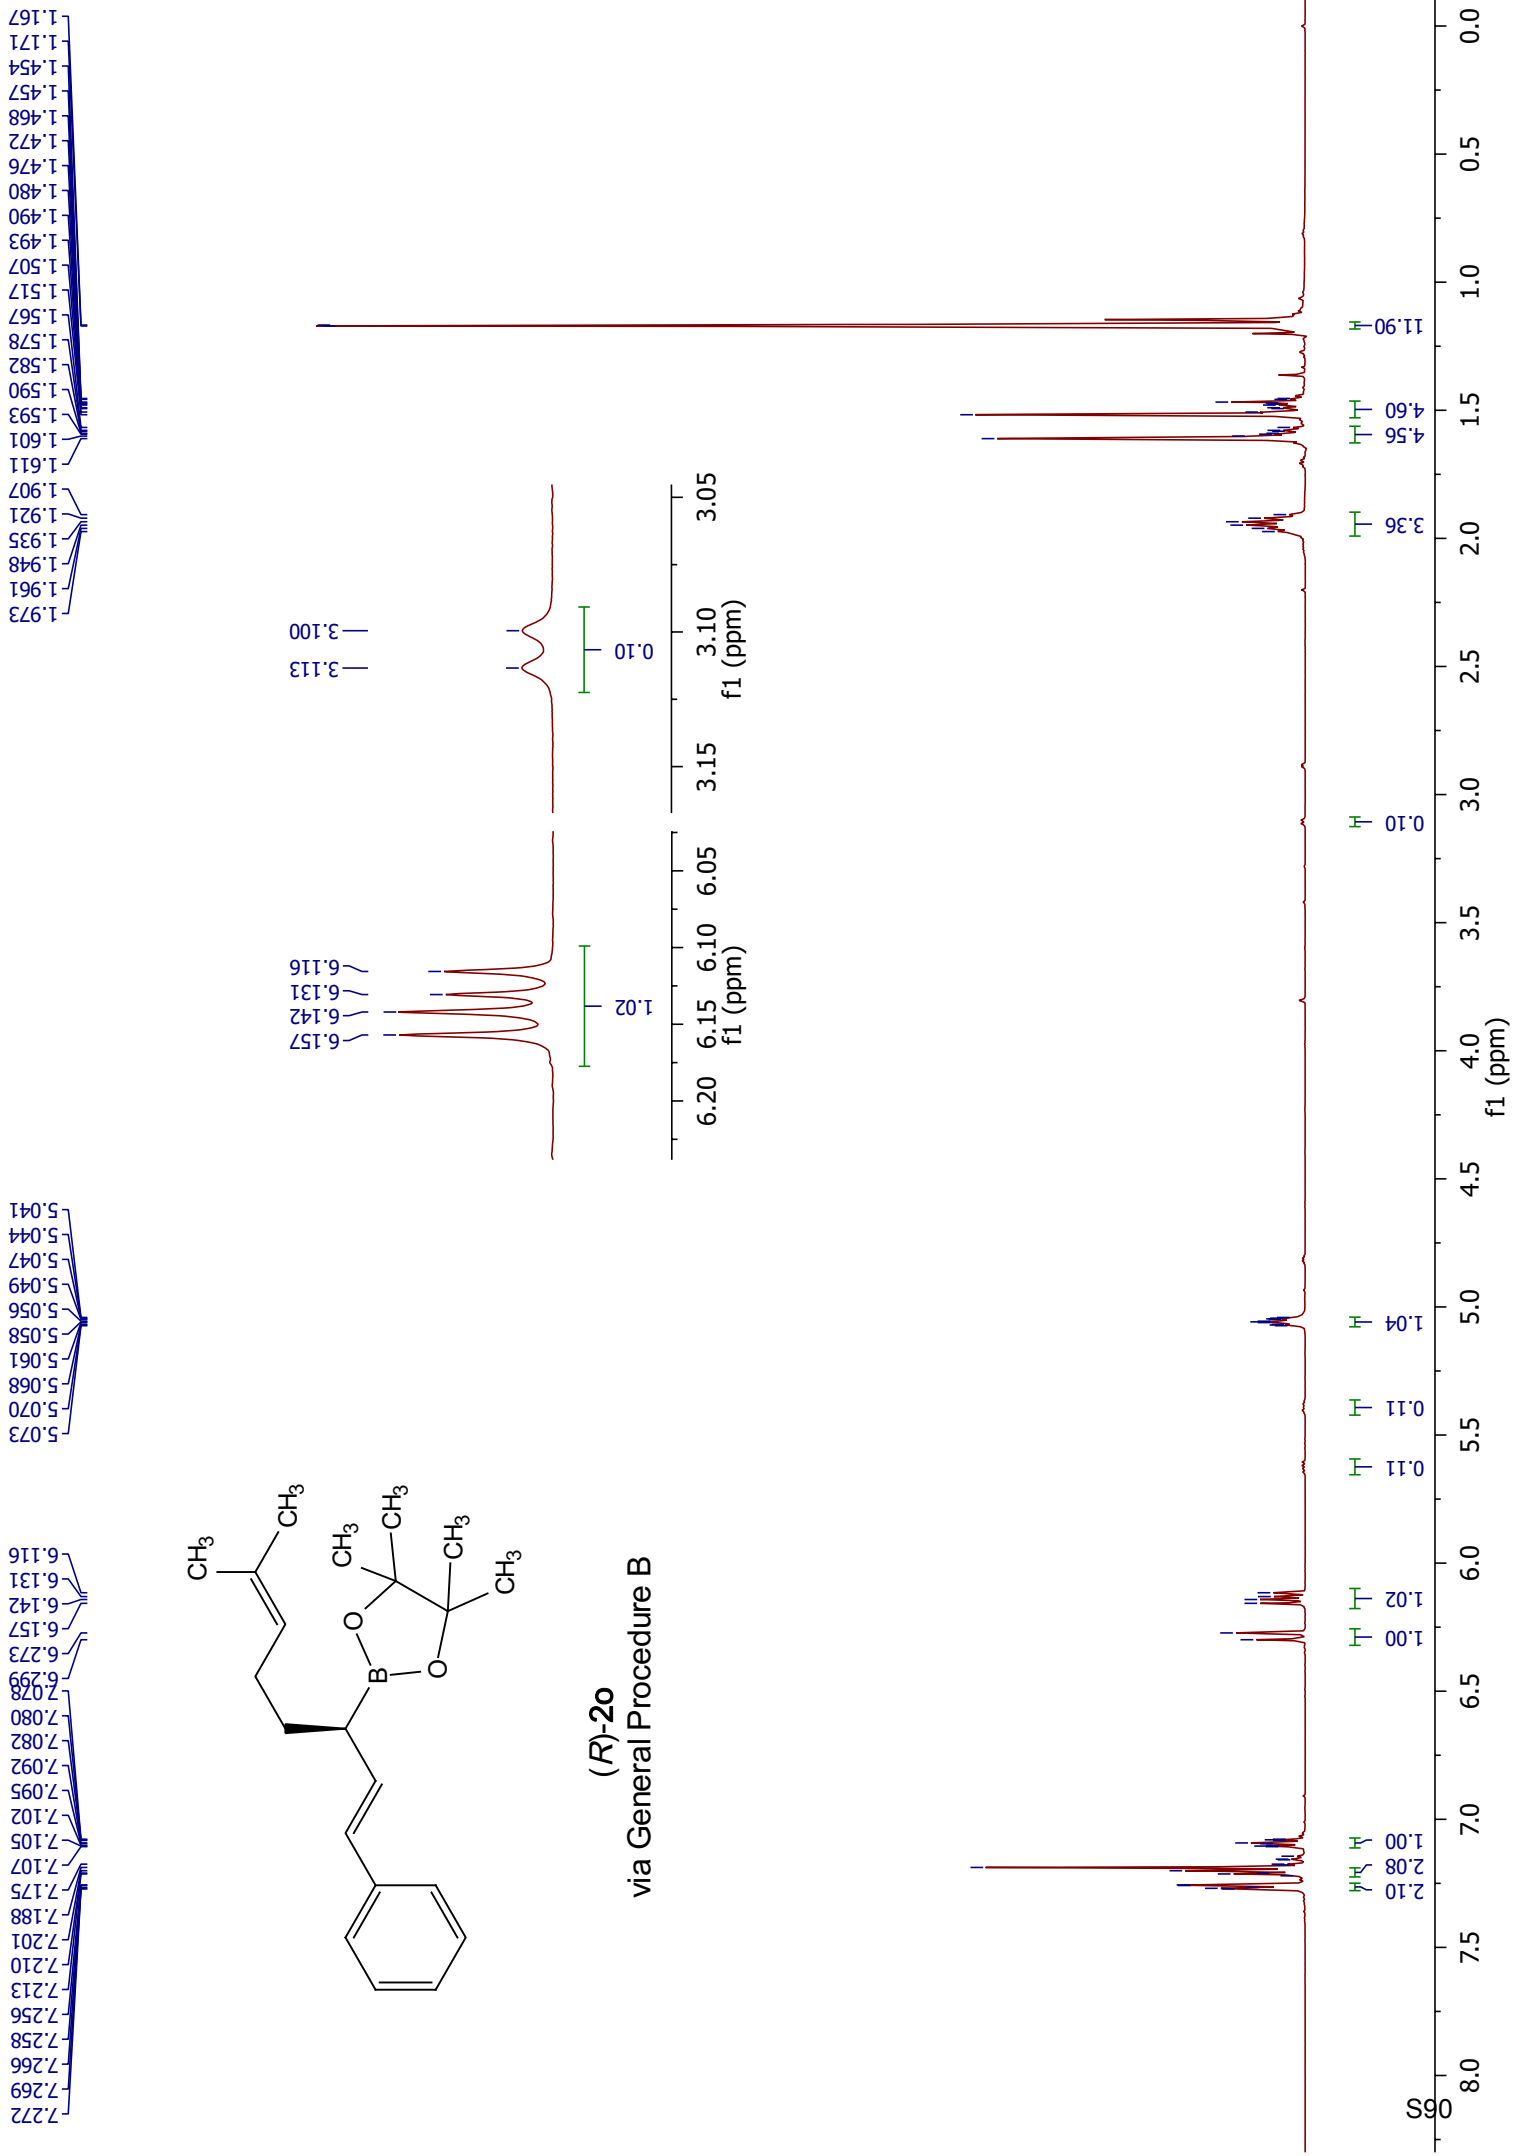

(R)-2o  
via General Procedure B



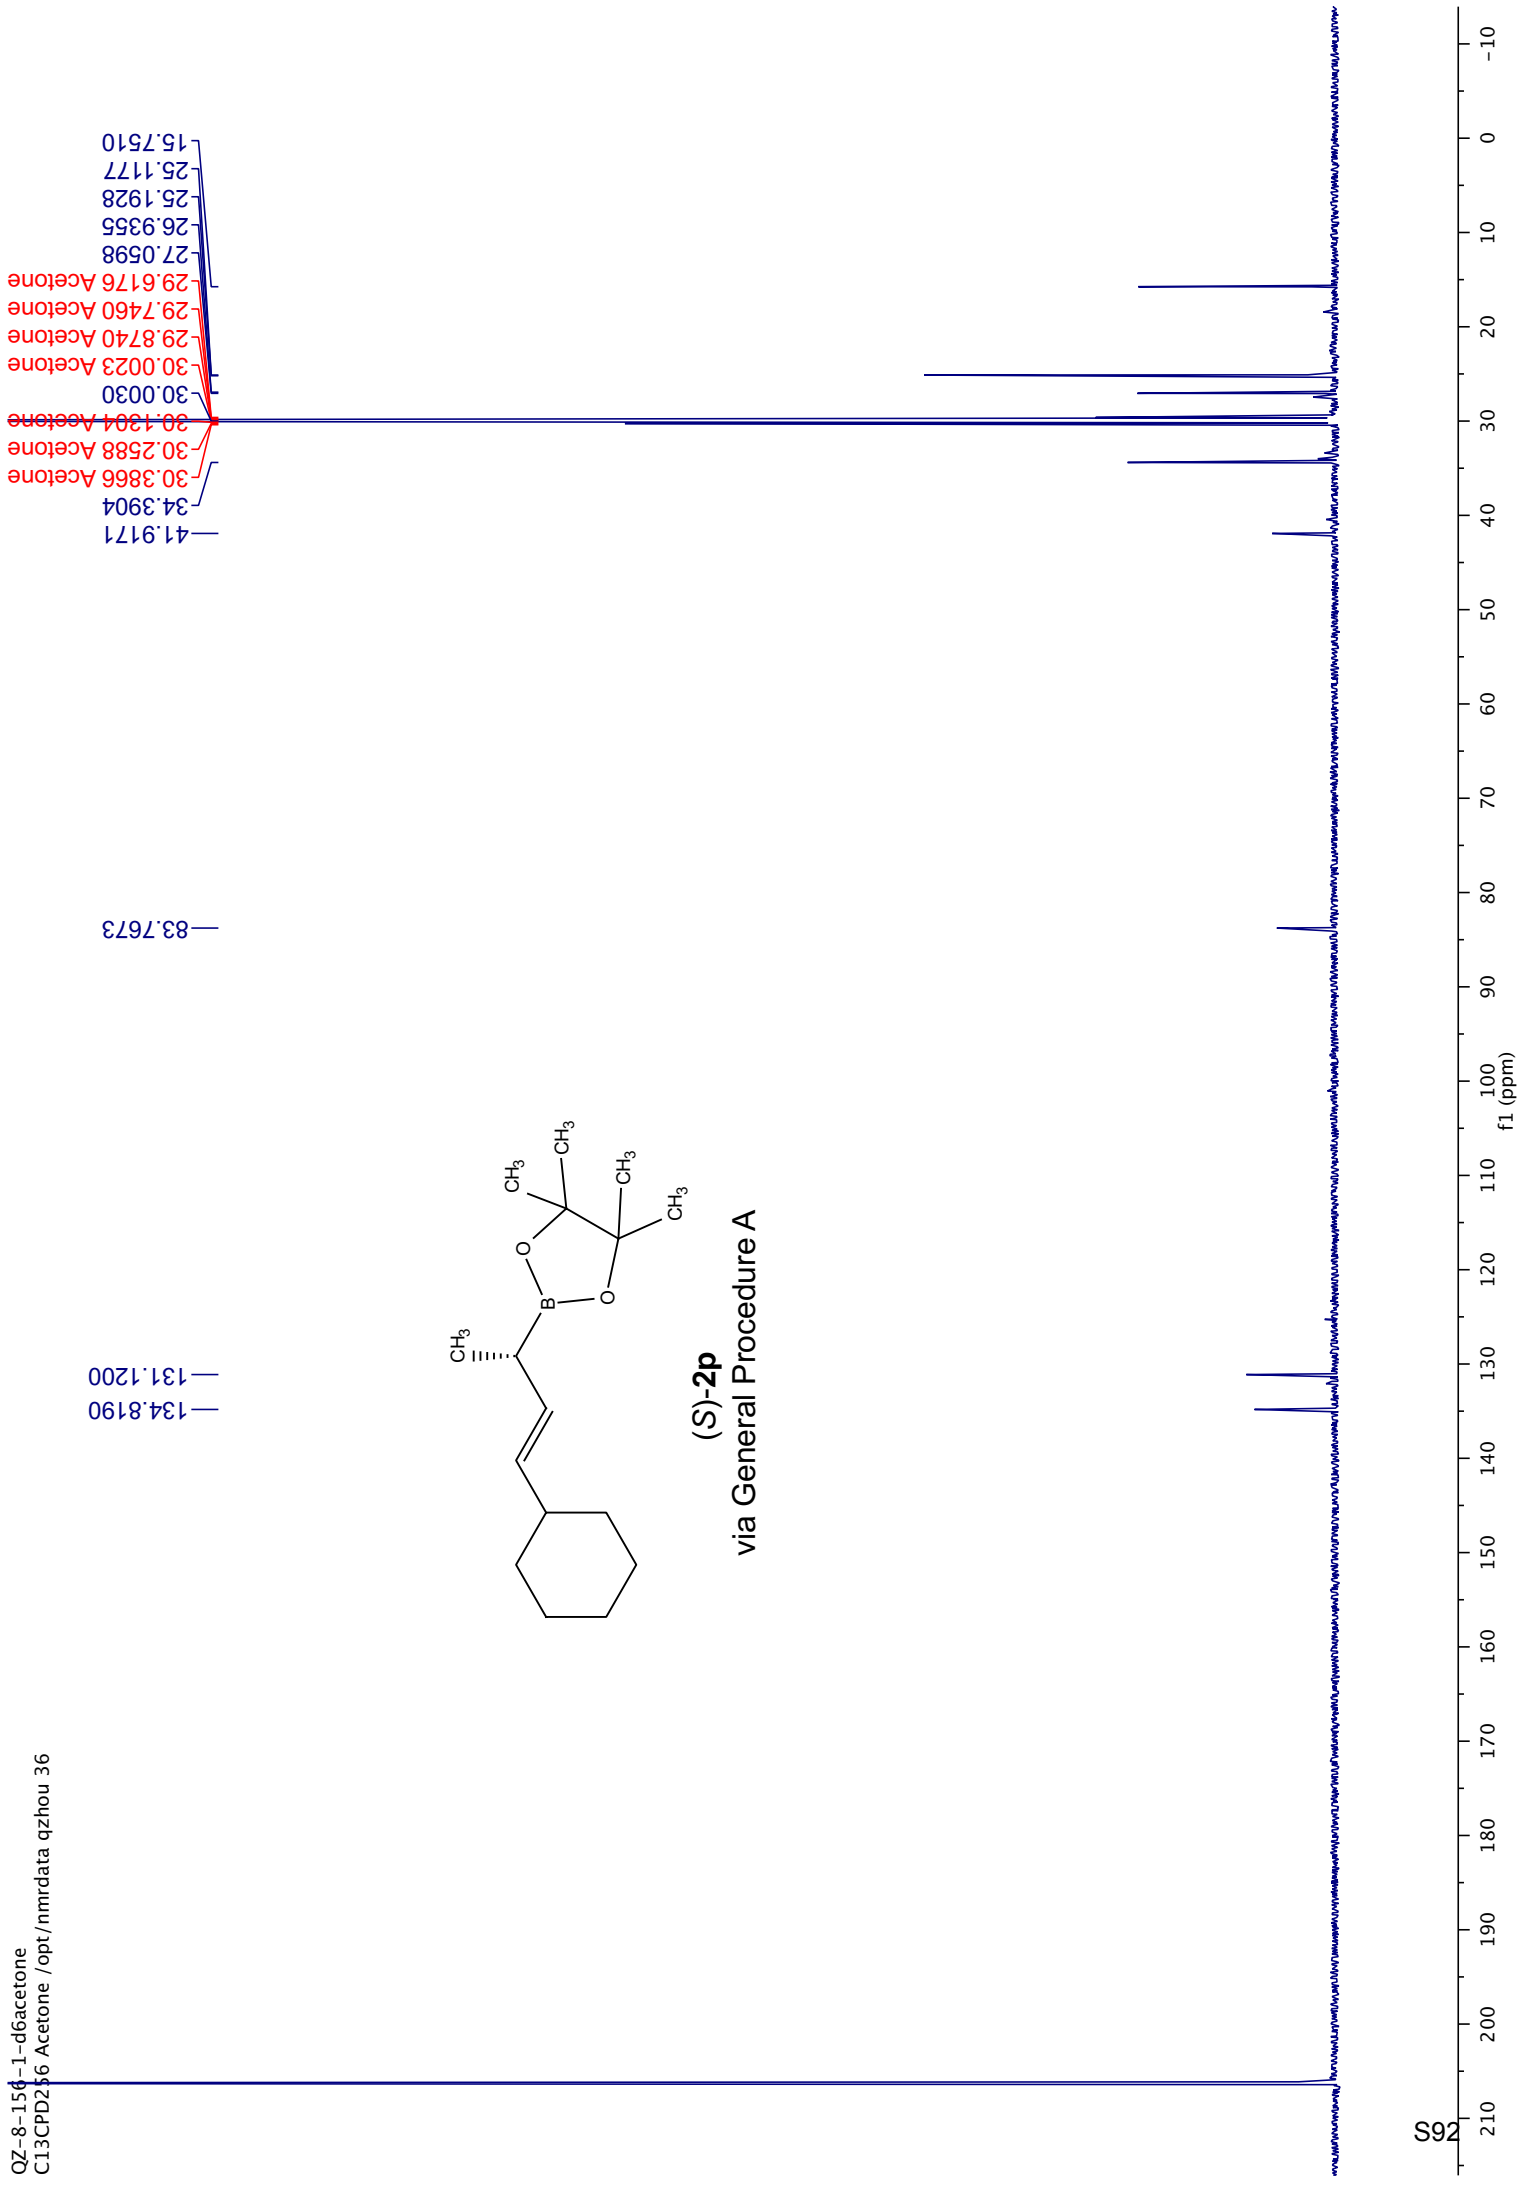

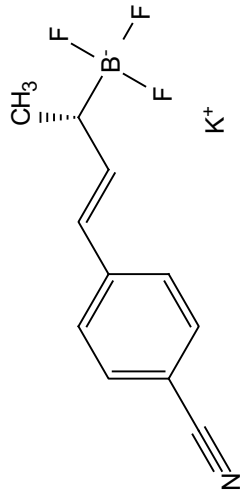

(S)-4q

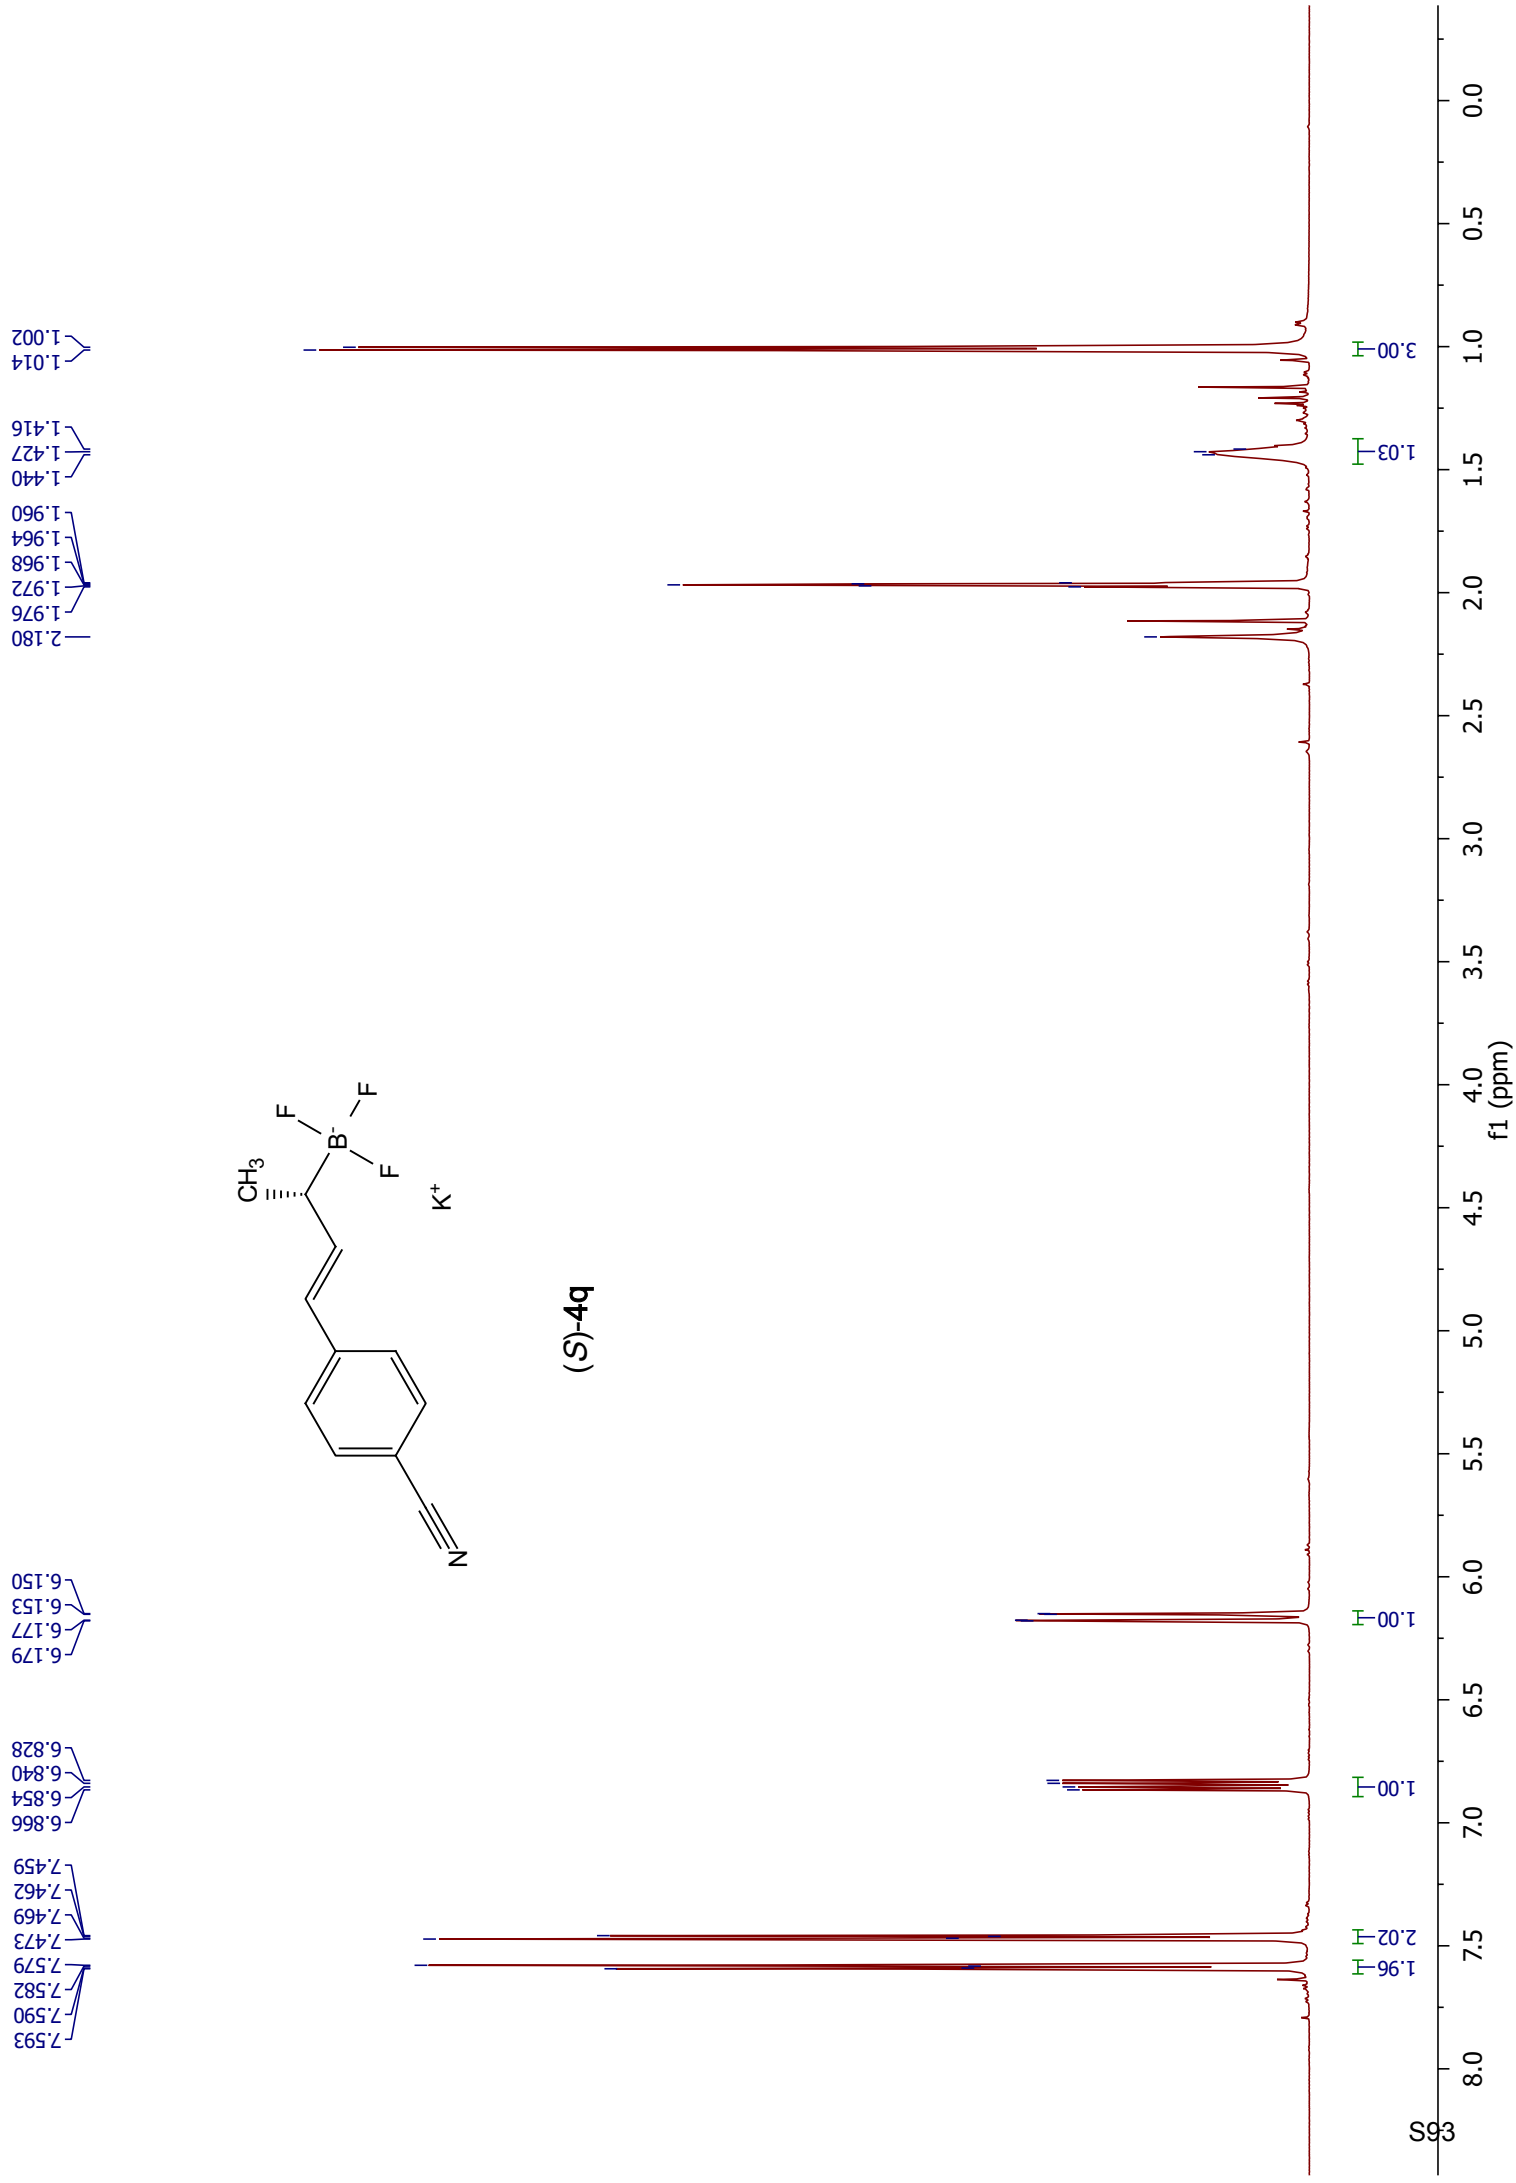

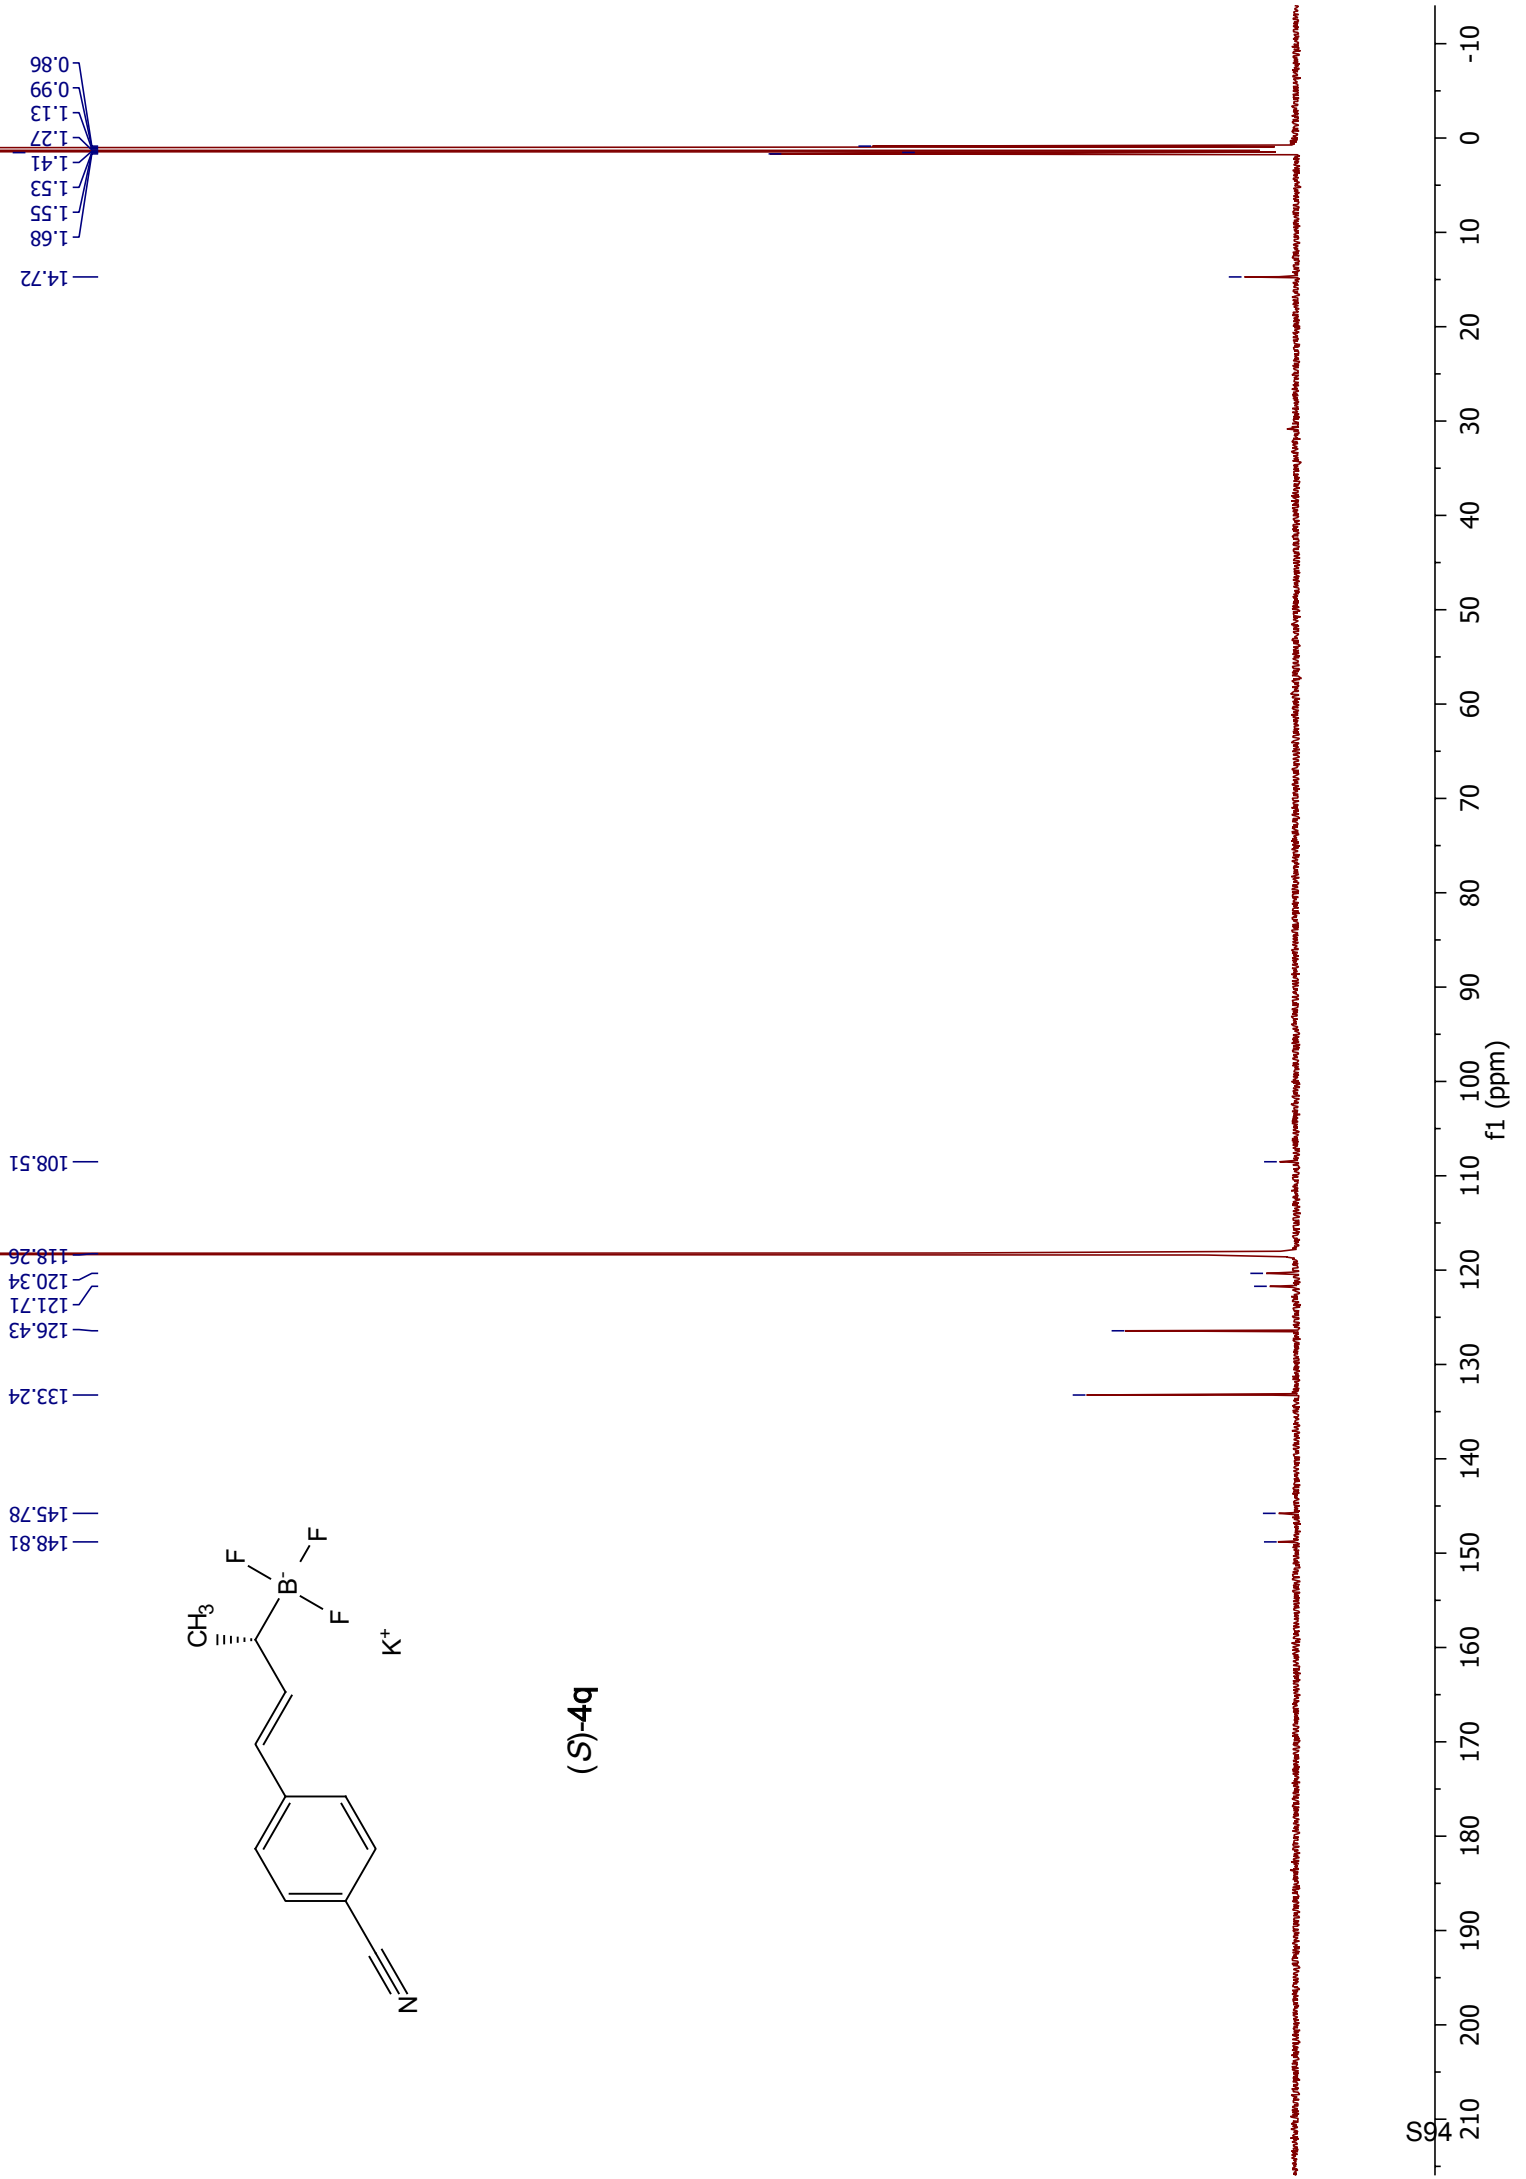

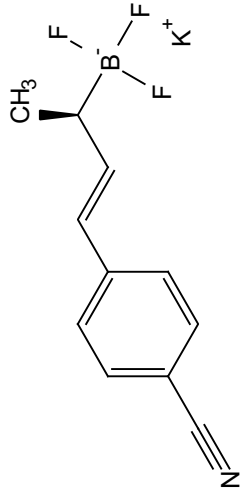

(R)-4q

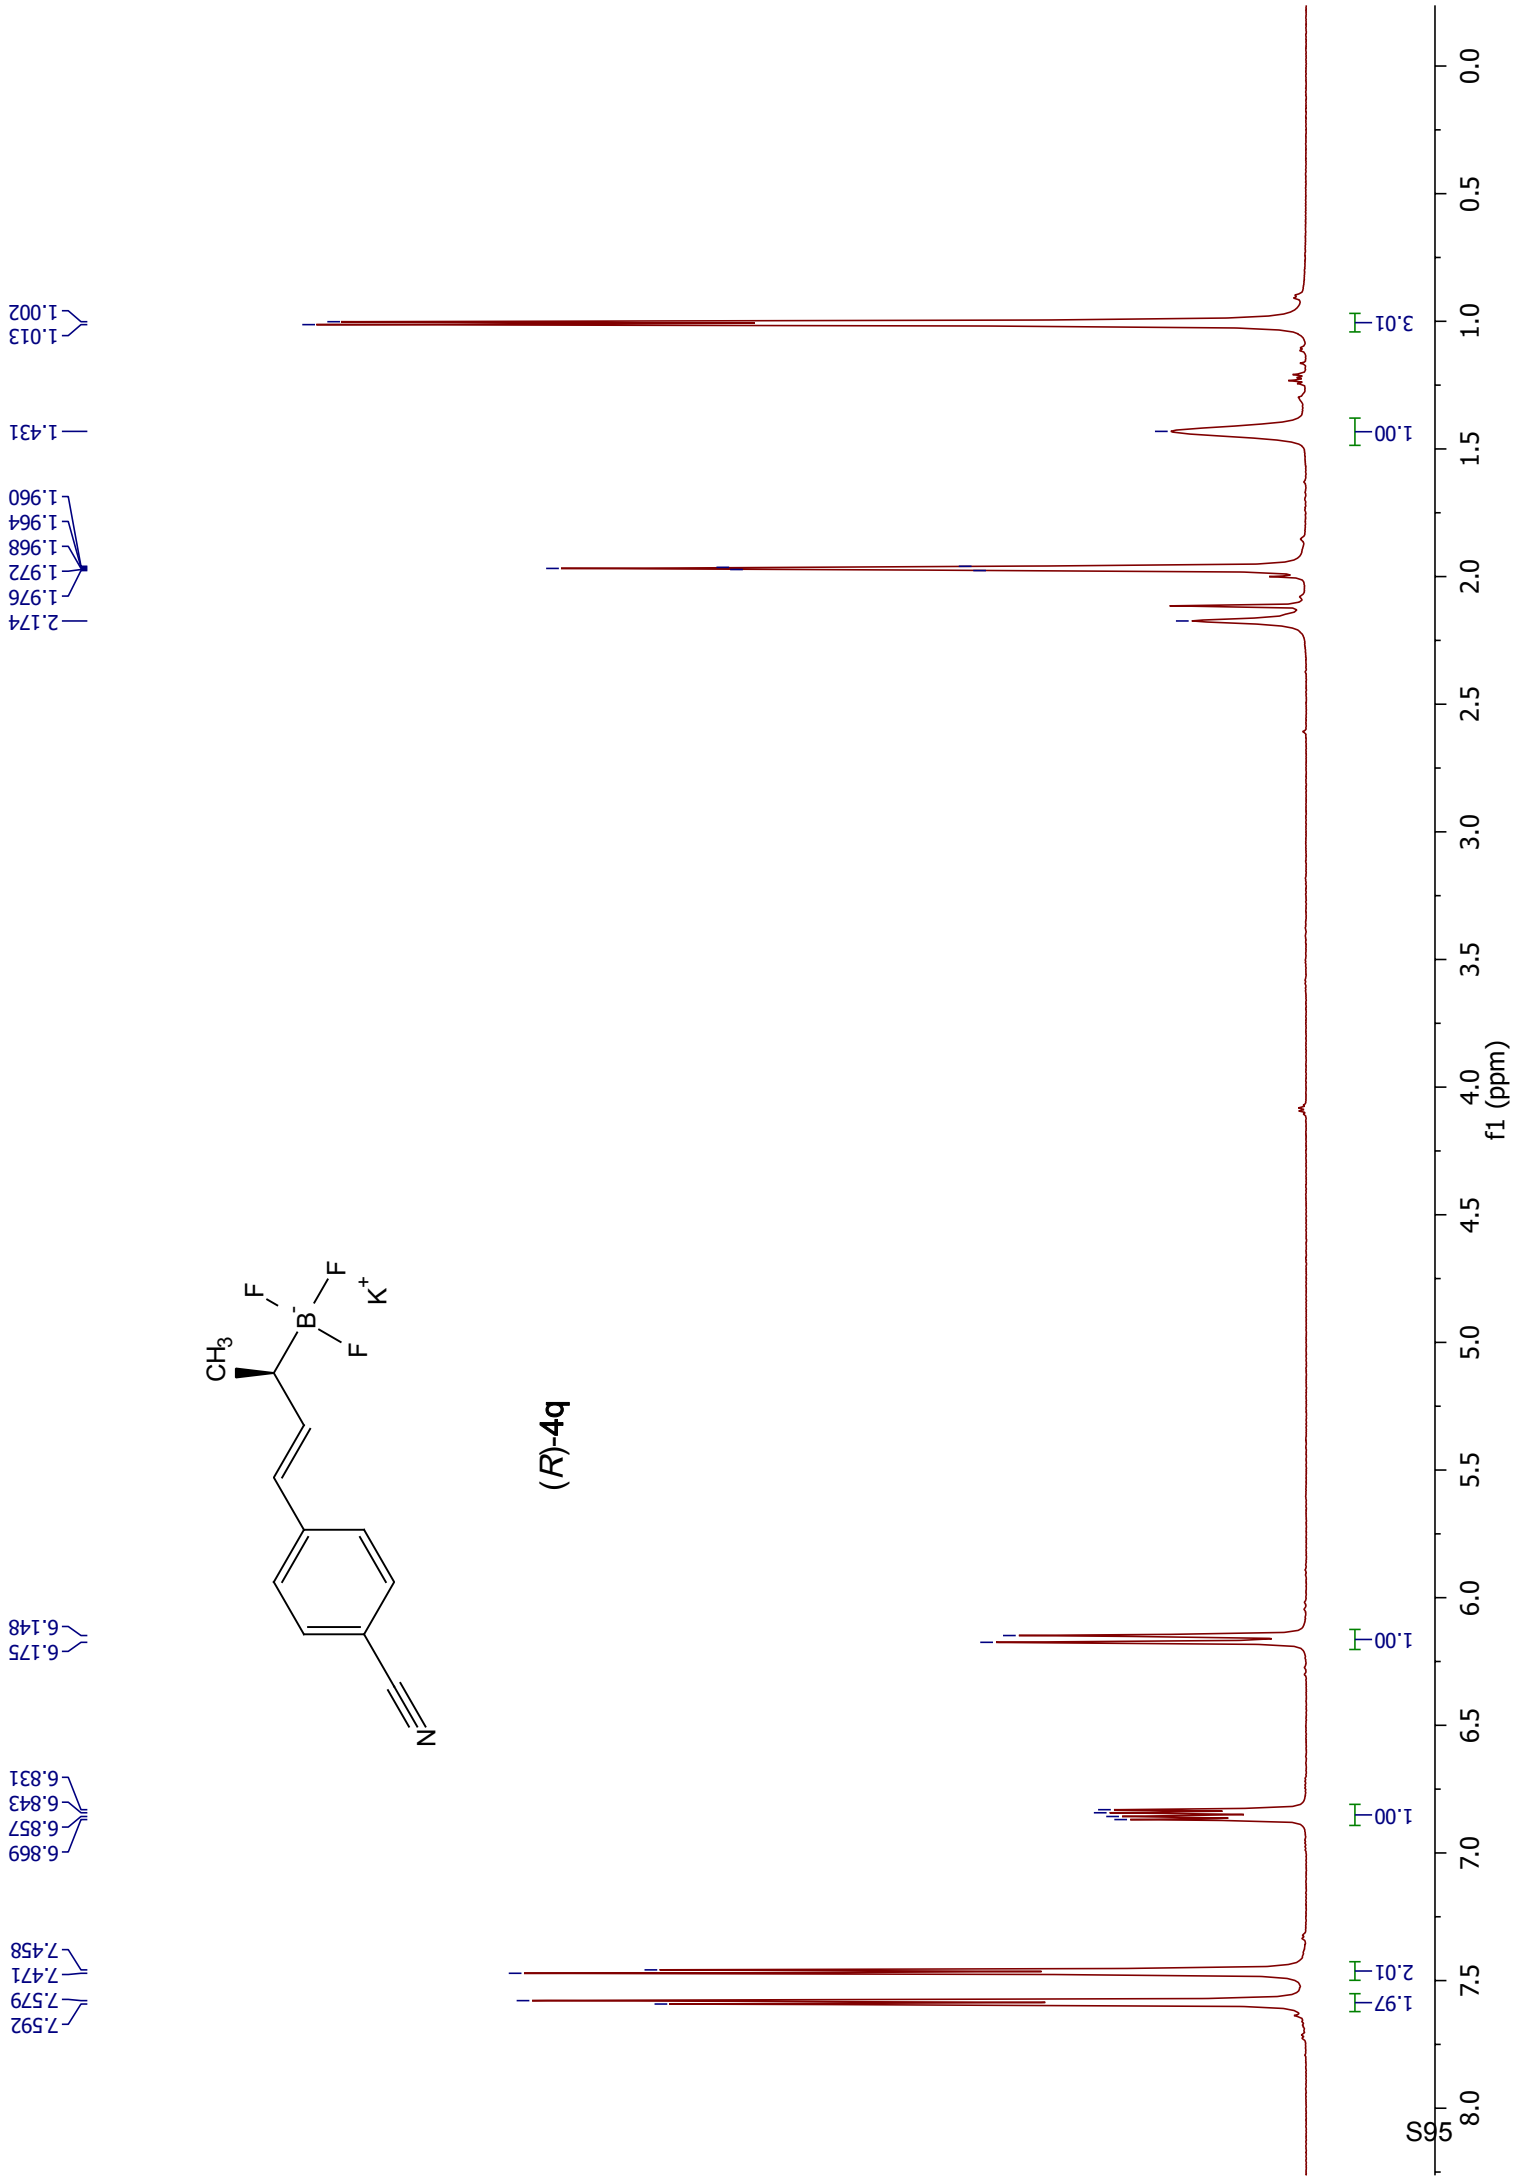

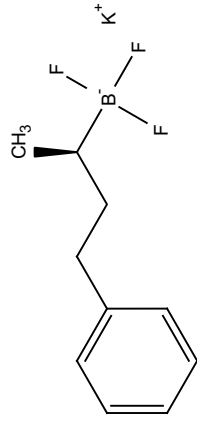

(R)-7

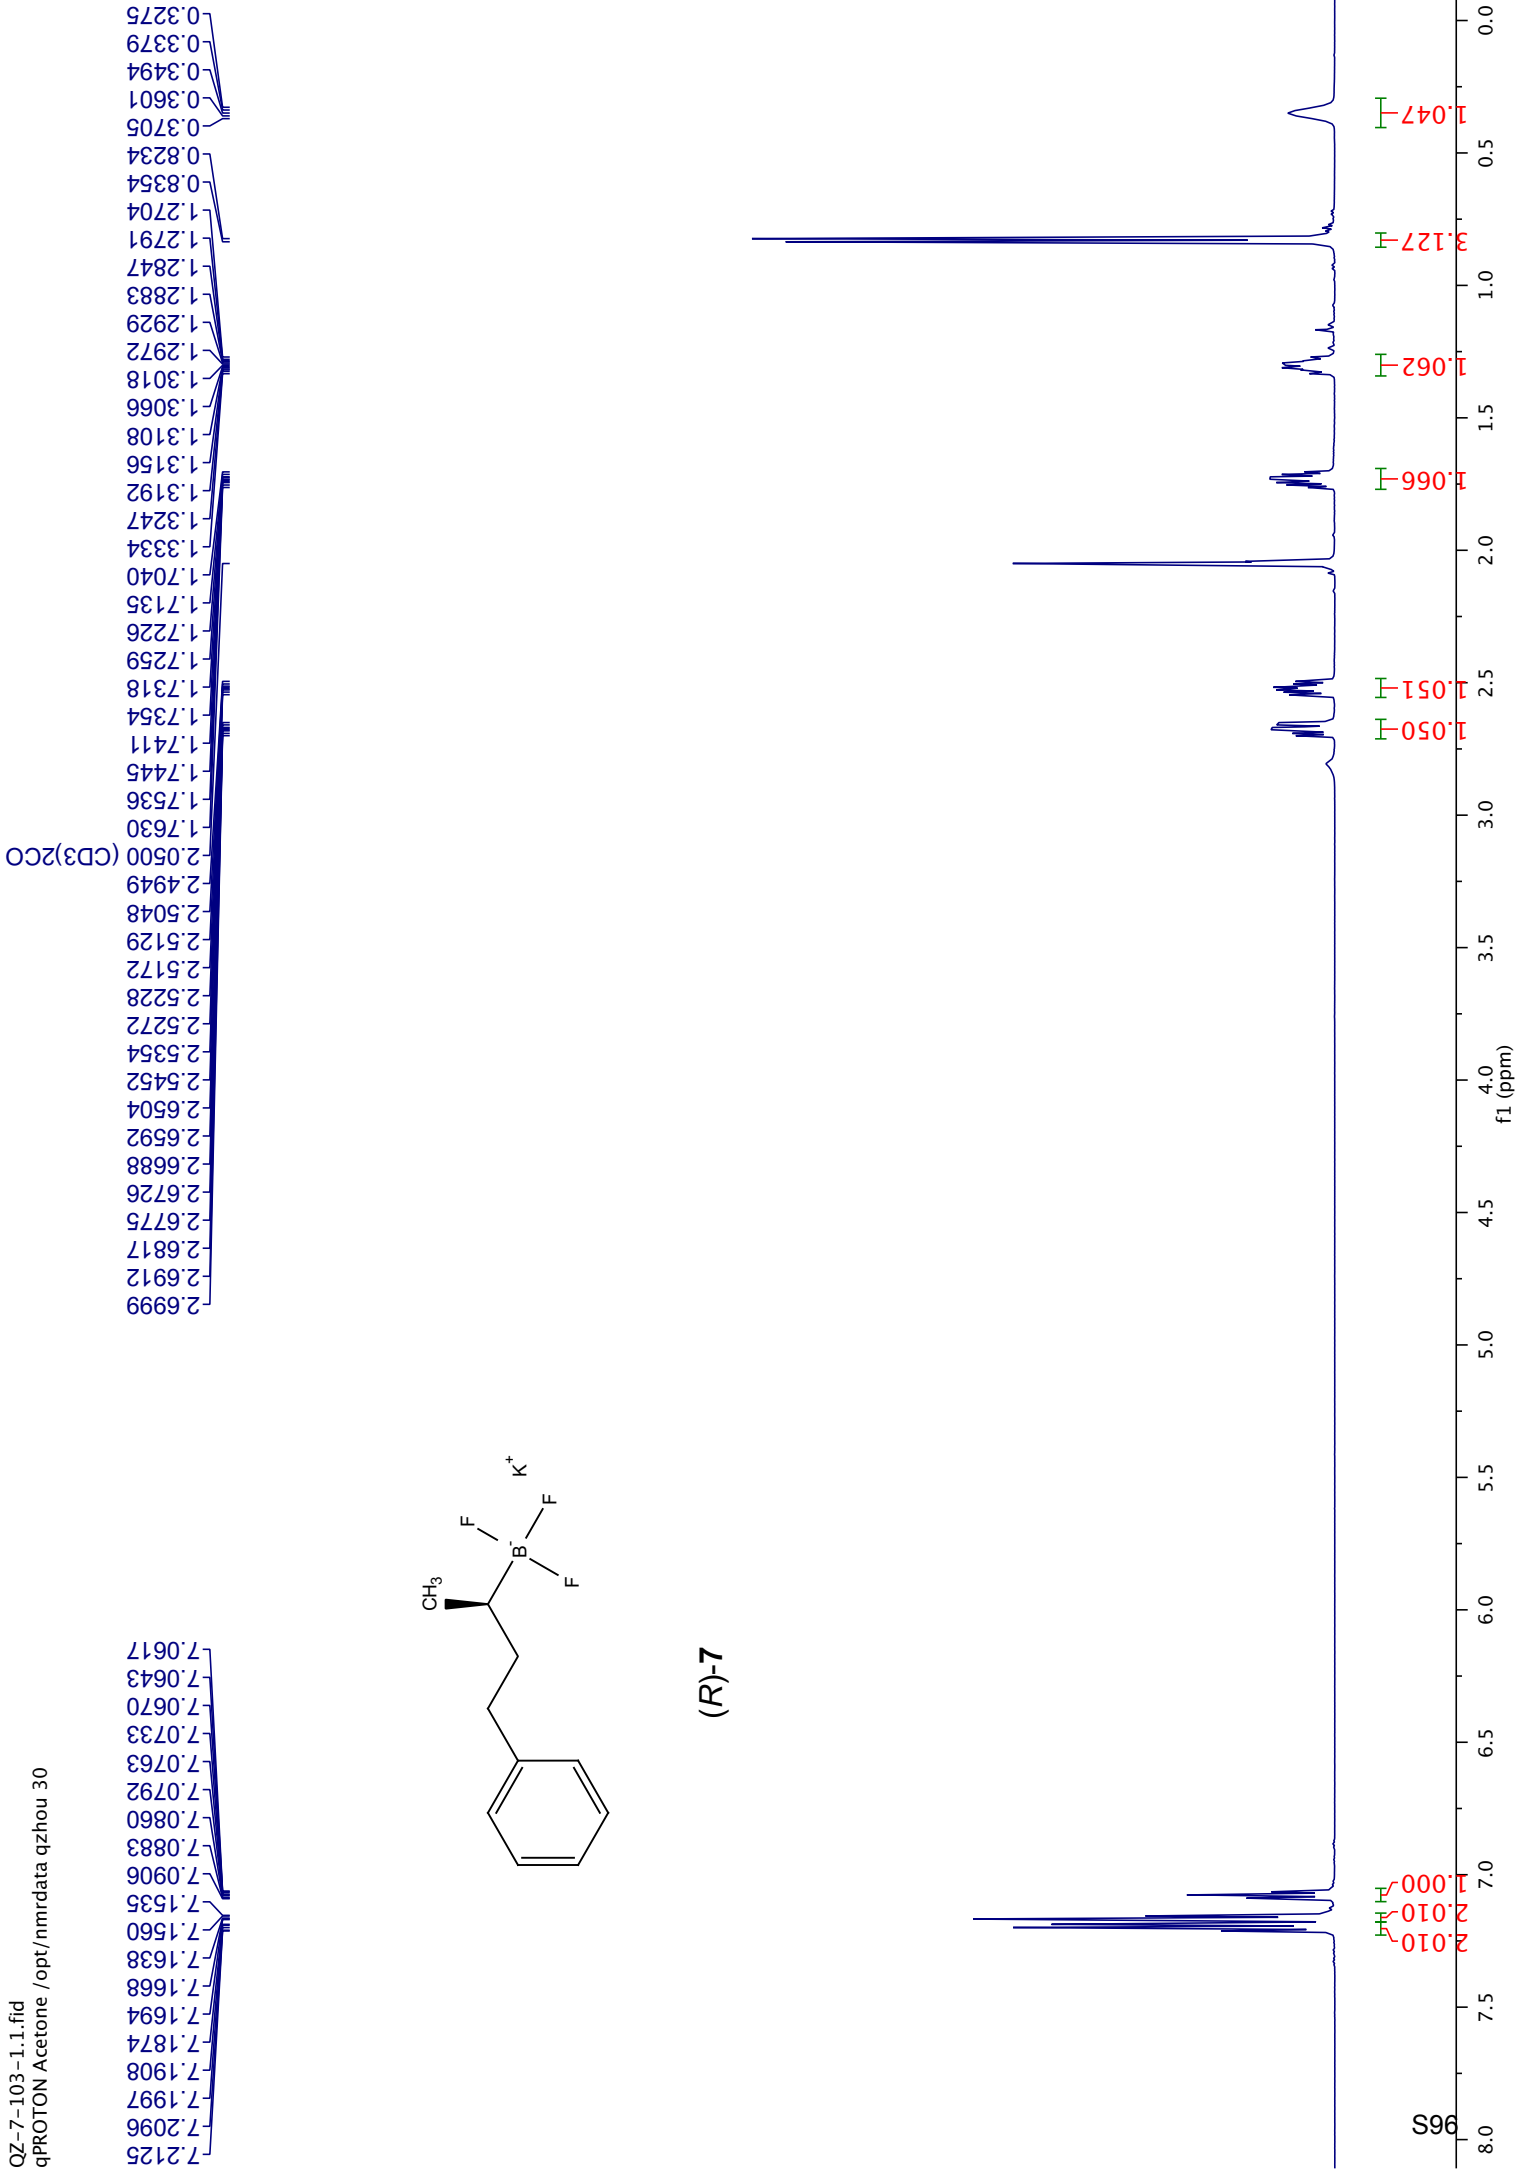



7.345  
7.333  
7.285  
7.273  
7.260  
7.260  
7.175  
7.163  
7.151  
6.368  
6.342  
6.229  
6.214  
6.203  
6.188

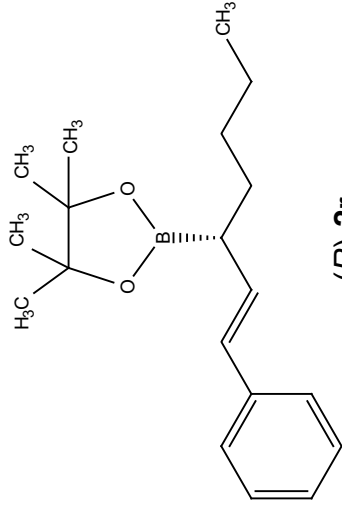

(R)-2r

via General Procedure B

2.020  
1.990  
1.976  
1.963  
1.949  
1.670  
1.660  
1.653  
1.648  
1.645  
1.638  
1.632  
1.626  
1.622  
1.610  
1.540  
1.524  
1.518  
1.511  
1.503  
1.494  
1.489  
1.343  
1.340  
1.343  
1.335  
1.332  
1.328  
1.320  
1.311  
1.309  
1.305  
1.300  
1.298  
1.243  
1.239  
1.221  
1.216  
0.896  
0.884  
0.873

6.3679  
6.3415  
5.702  
5.688  
5.677  
5.663

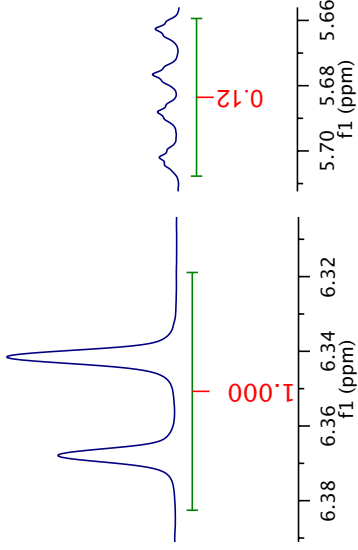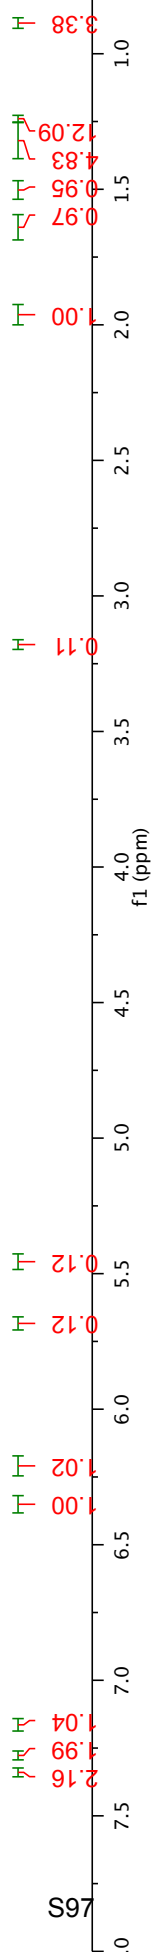

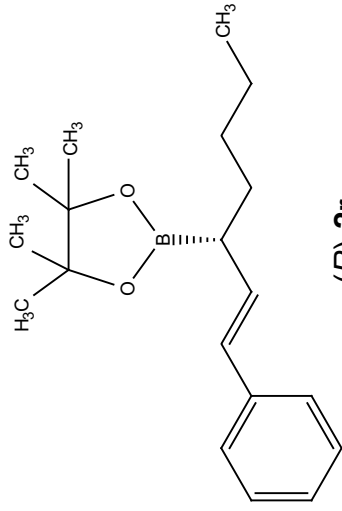

(R)-2r

via General Procedure B

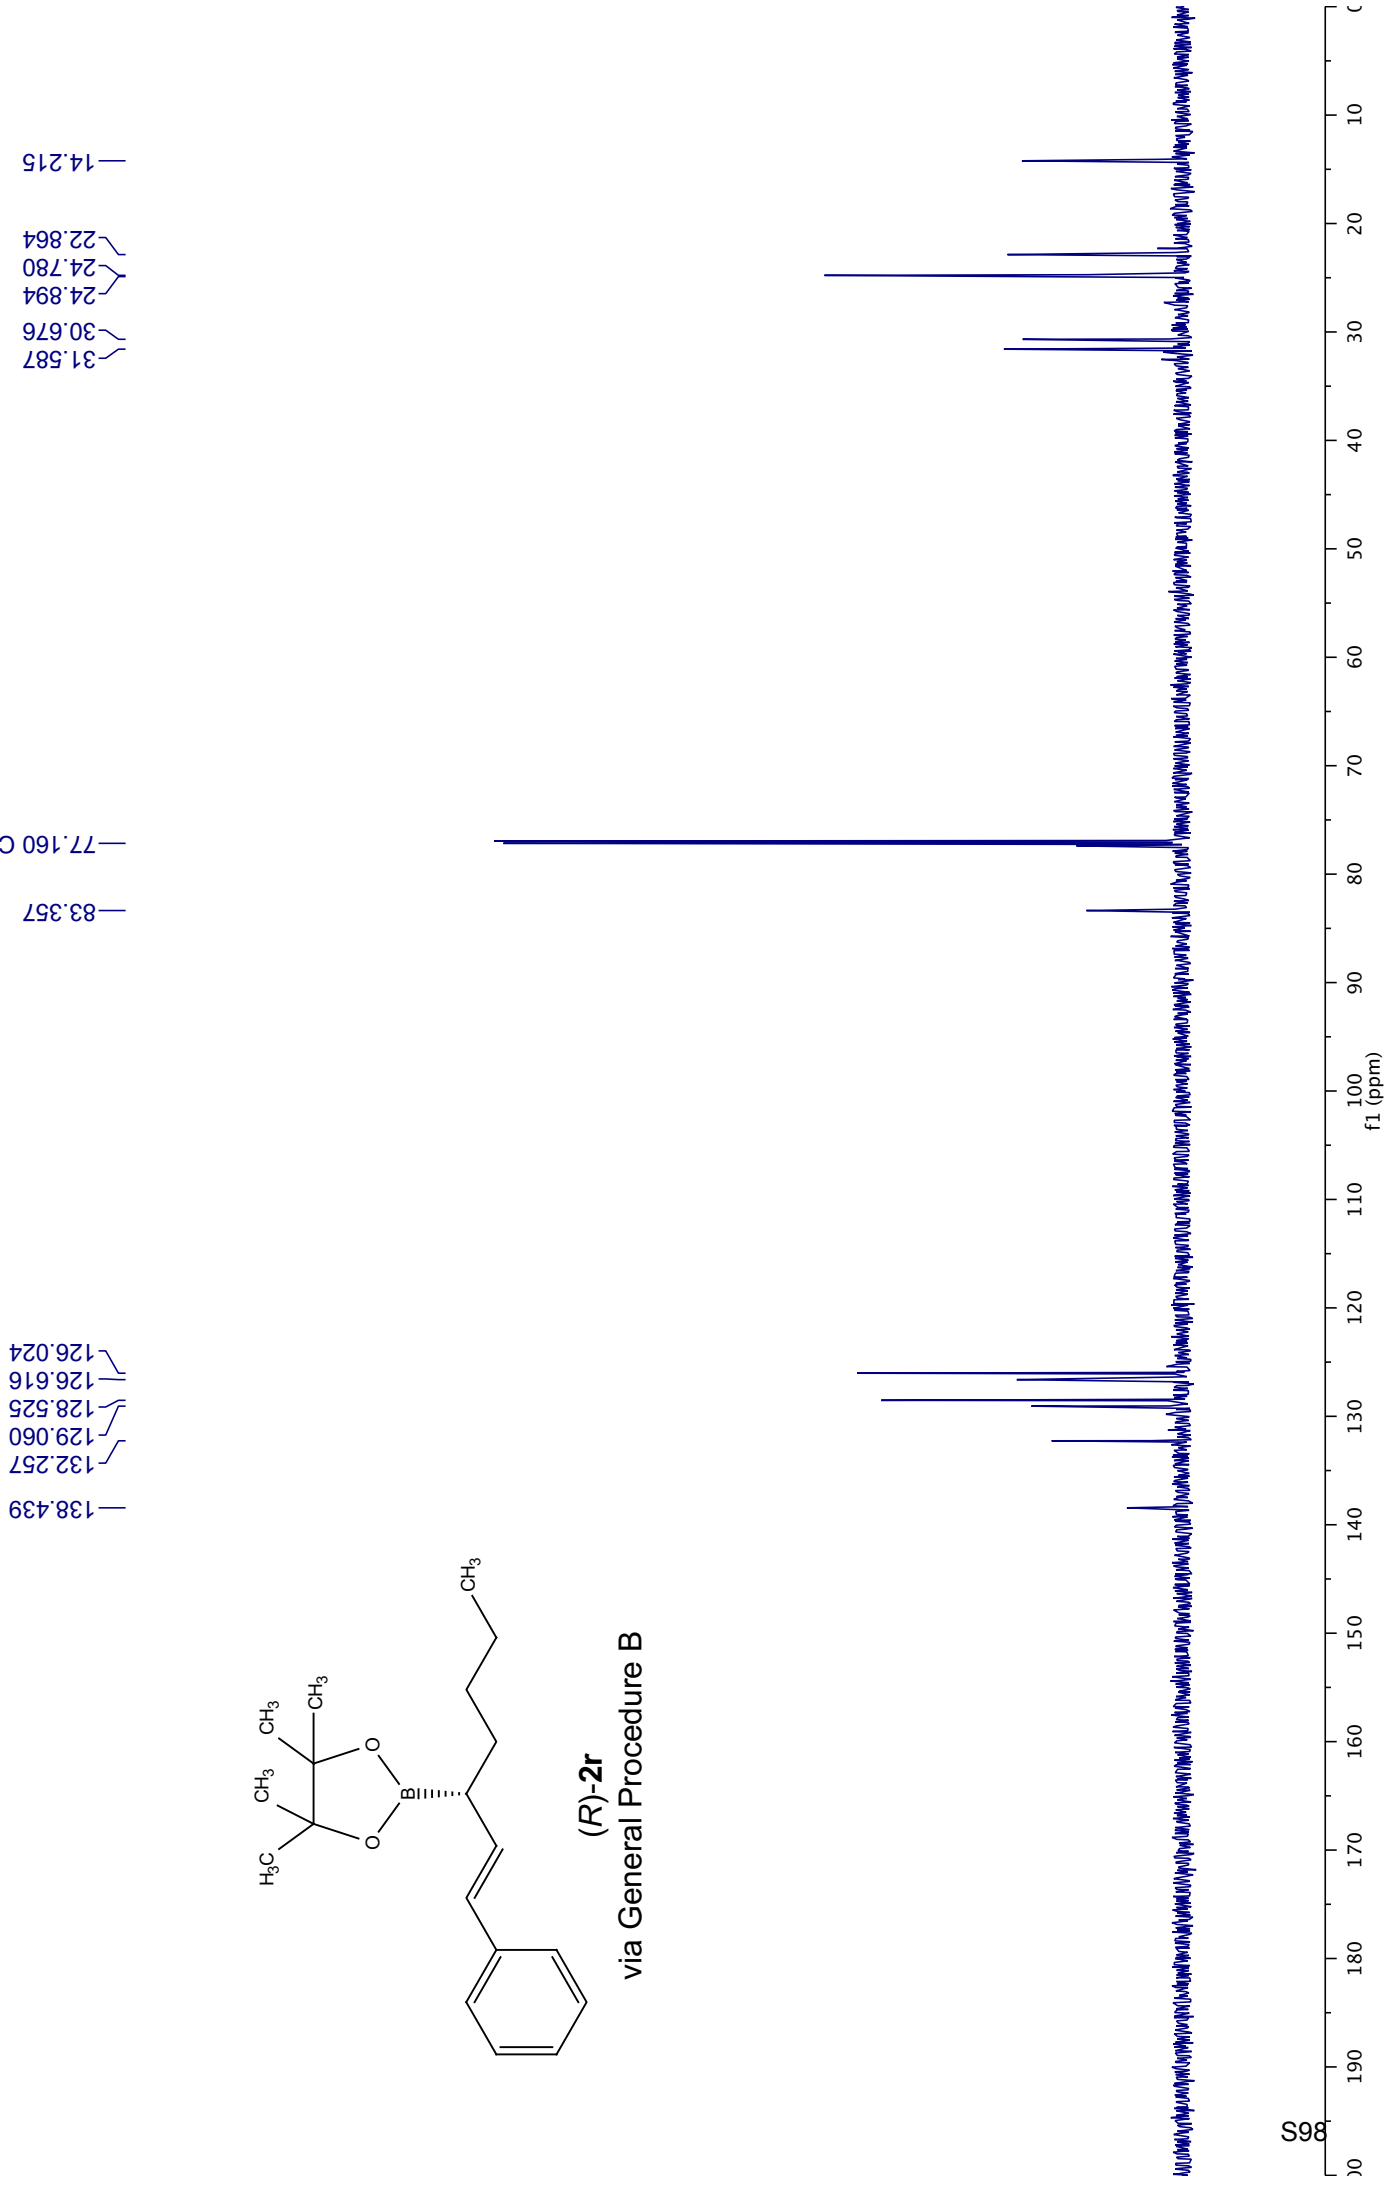



177.0066  
148.8715  
134.2168  
131.1507  
128.3327  
126.7689  
126.6558  
70.7884  
38.8947  
34.0111  
27.2852  
24.0840  
20.4866

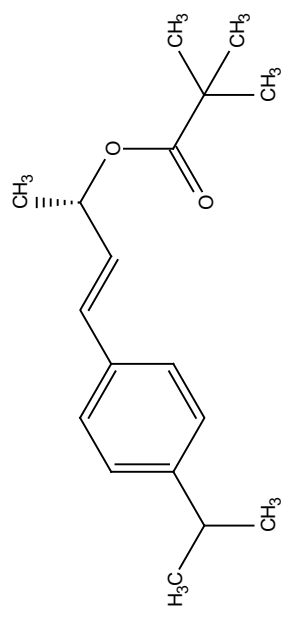

(S)-1b

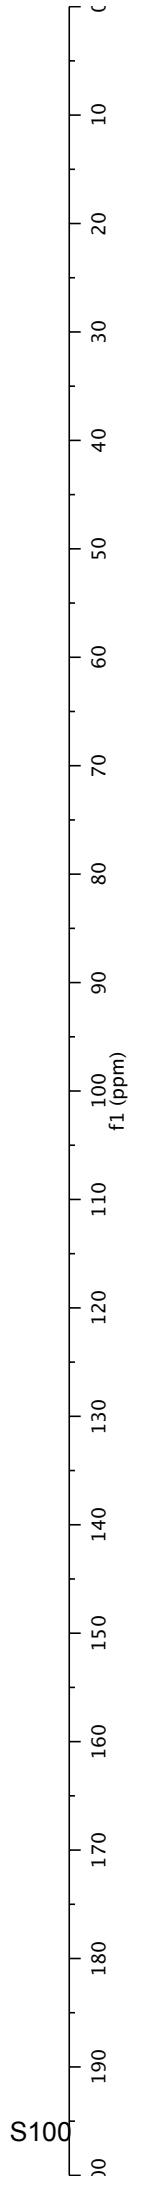

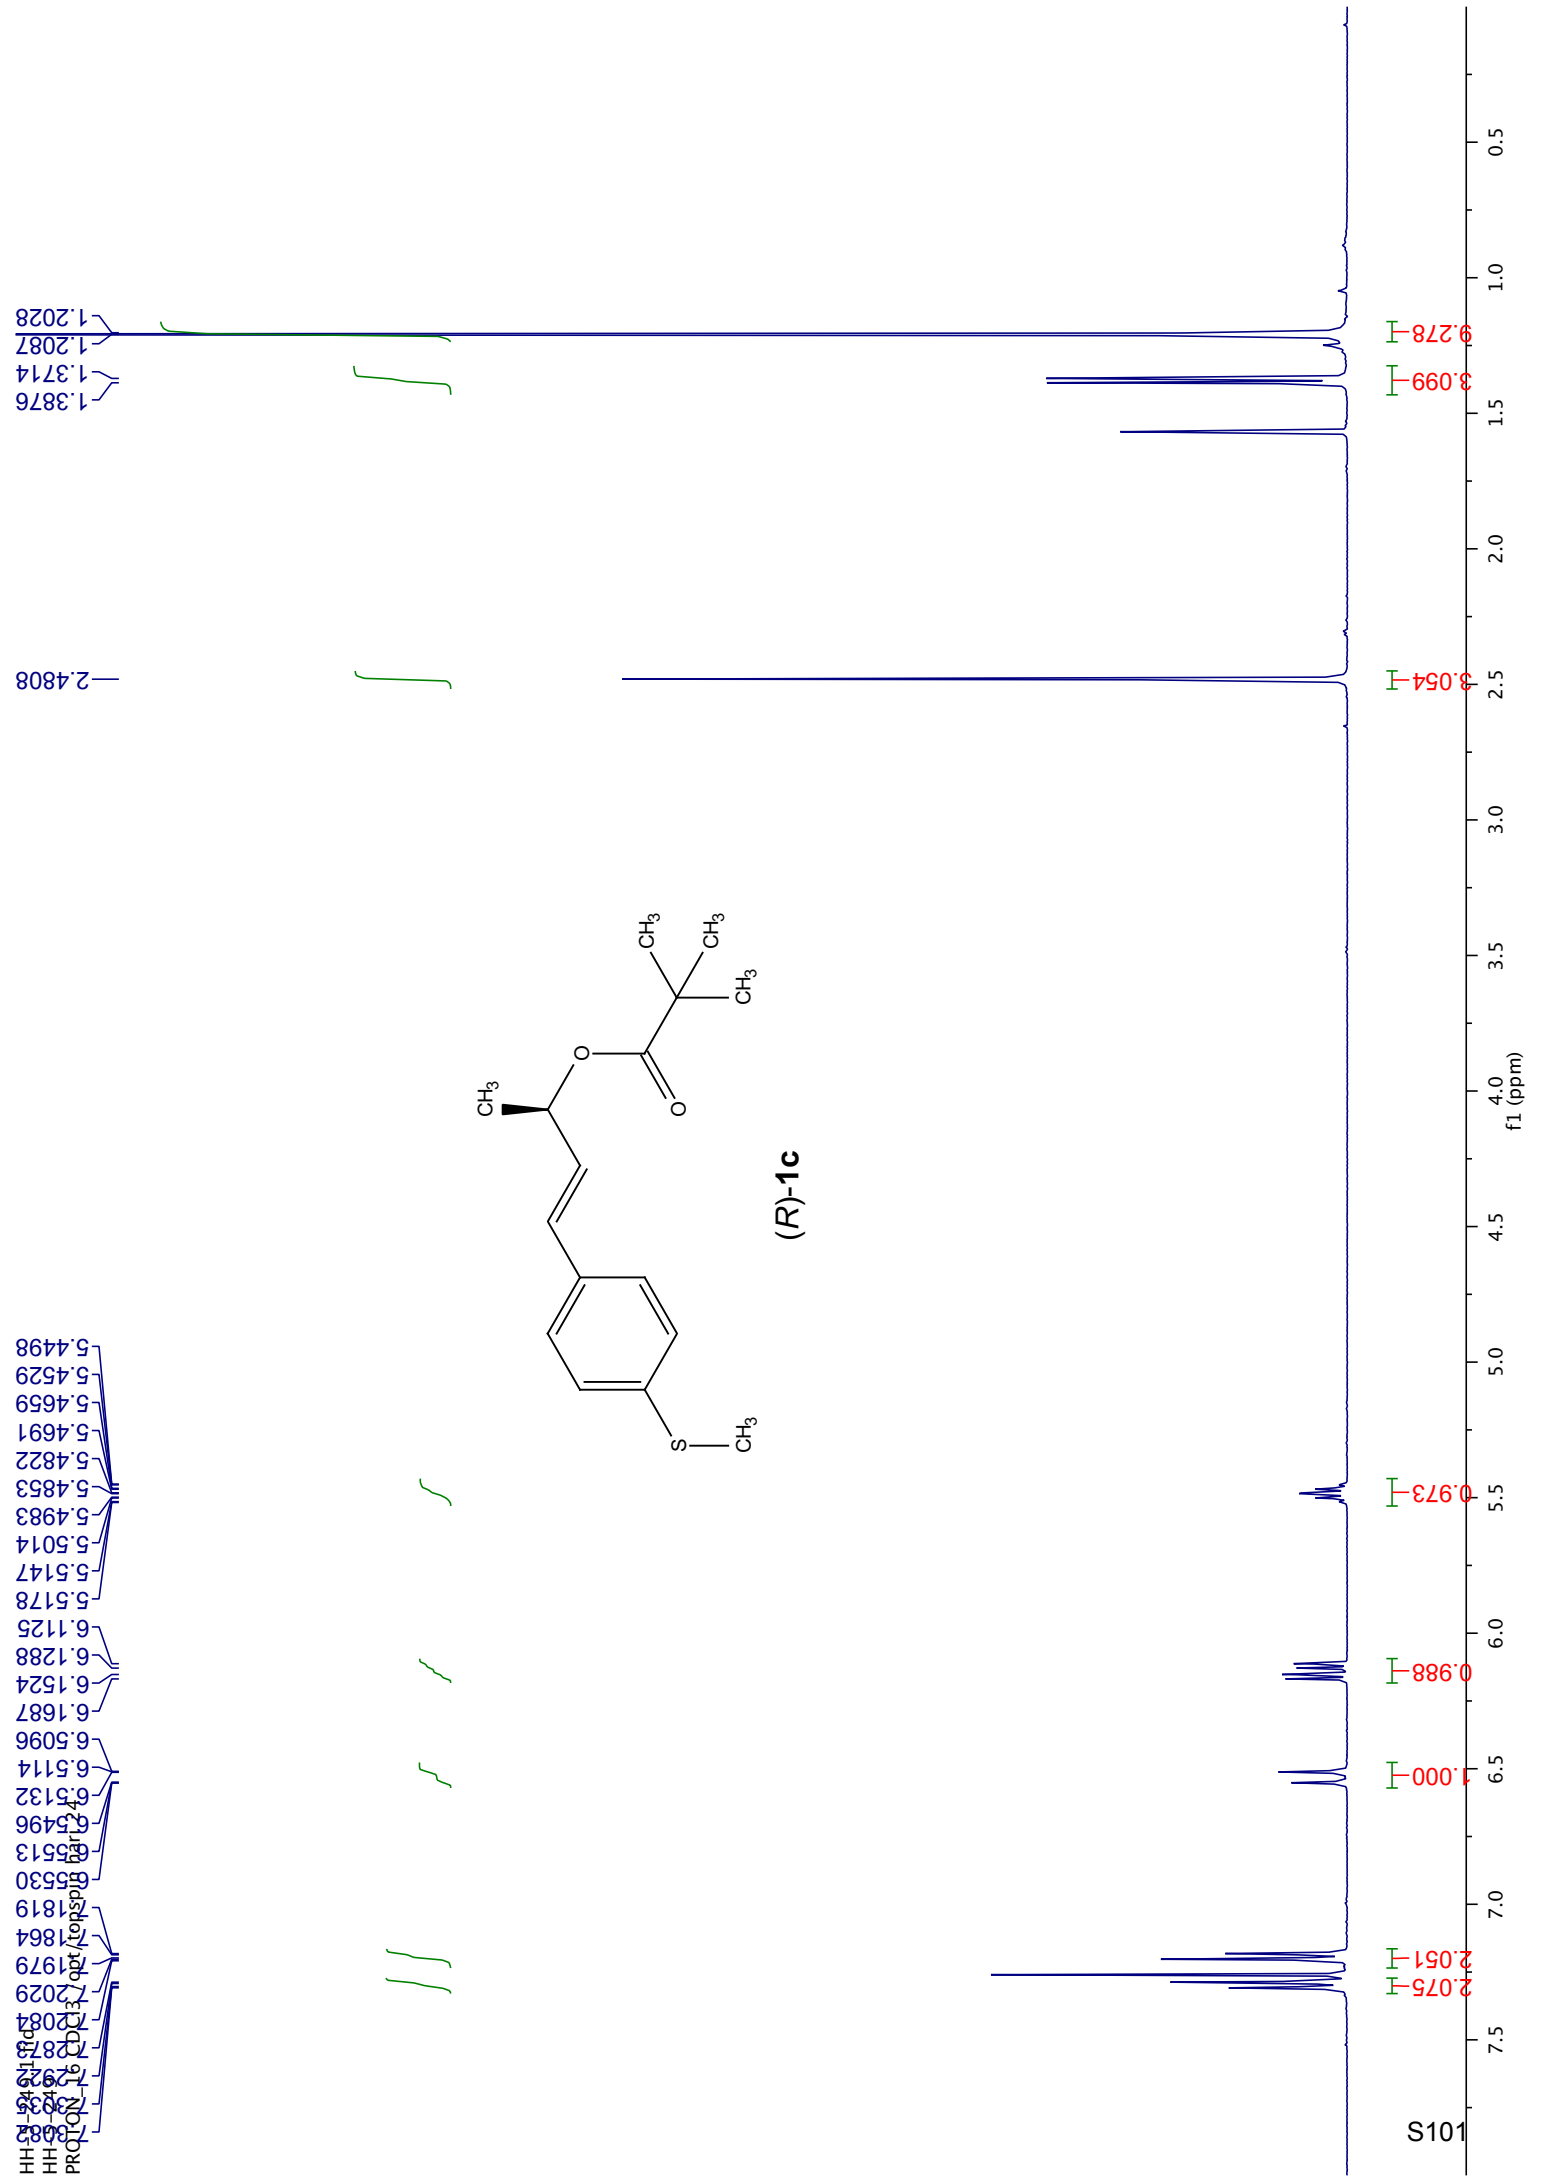

138.1841  
133.5038  
130.5760  
128.6320  
127.0736  
126.6418

70.6815

38.9110

27.2859

20.4525

15.92226

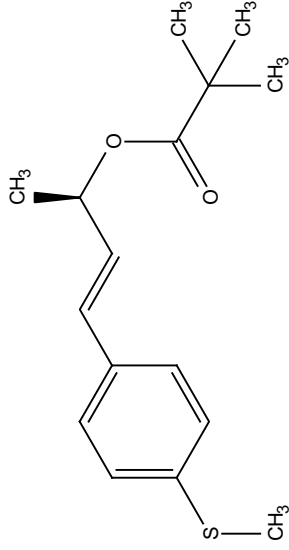

(R)-1c

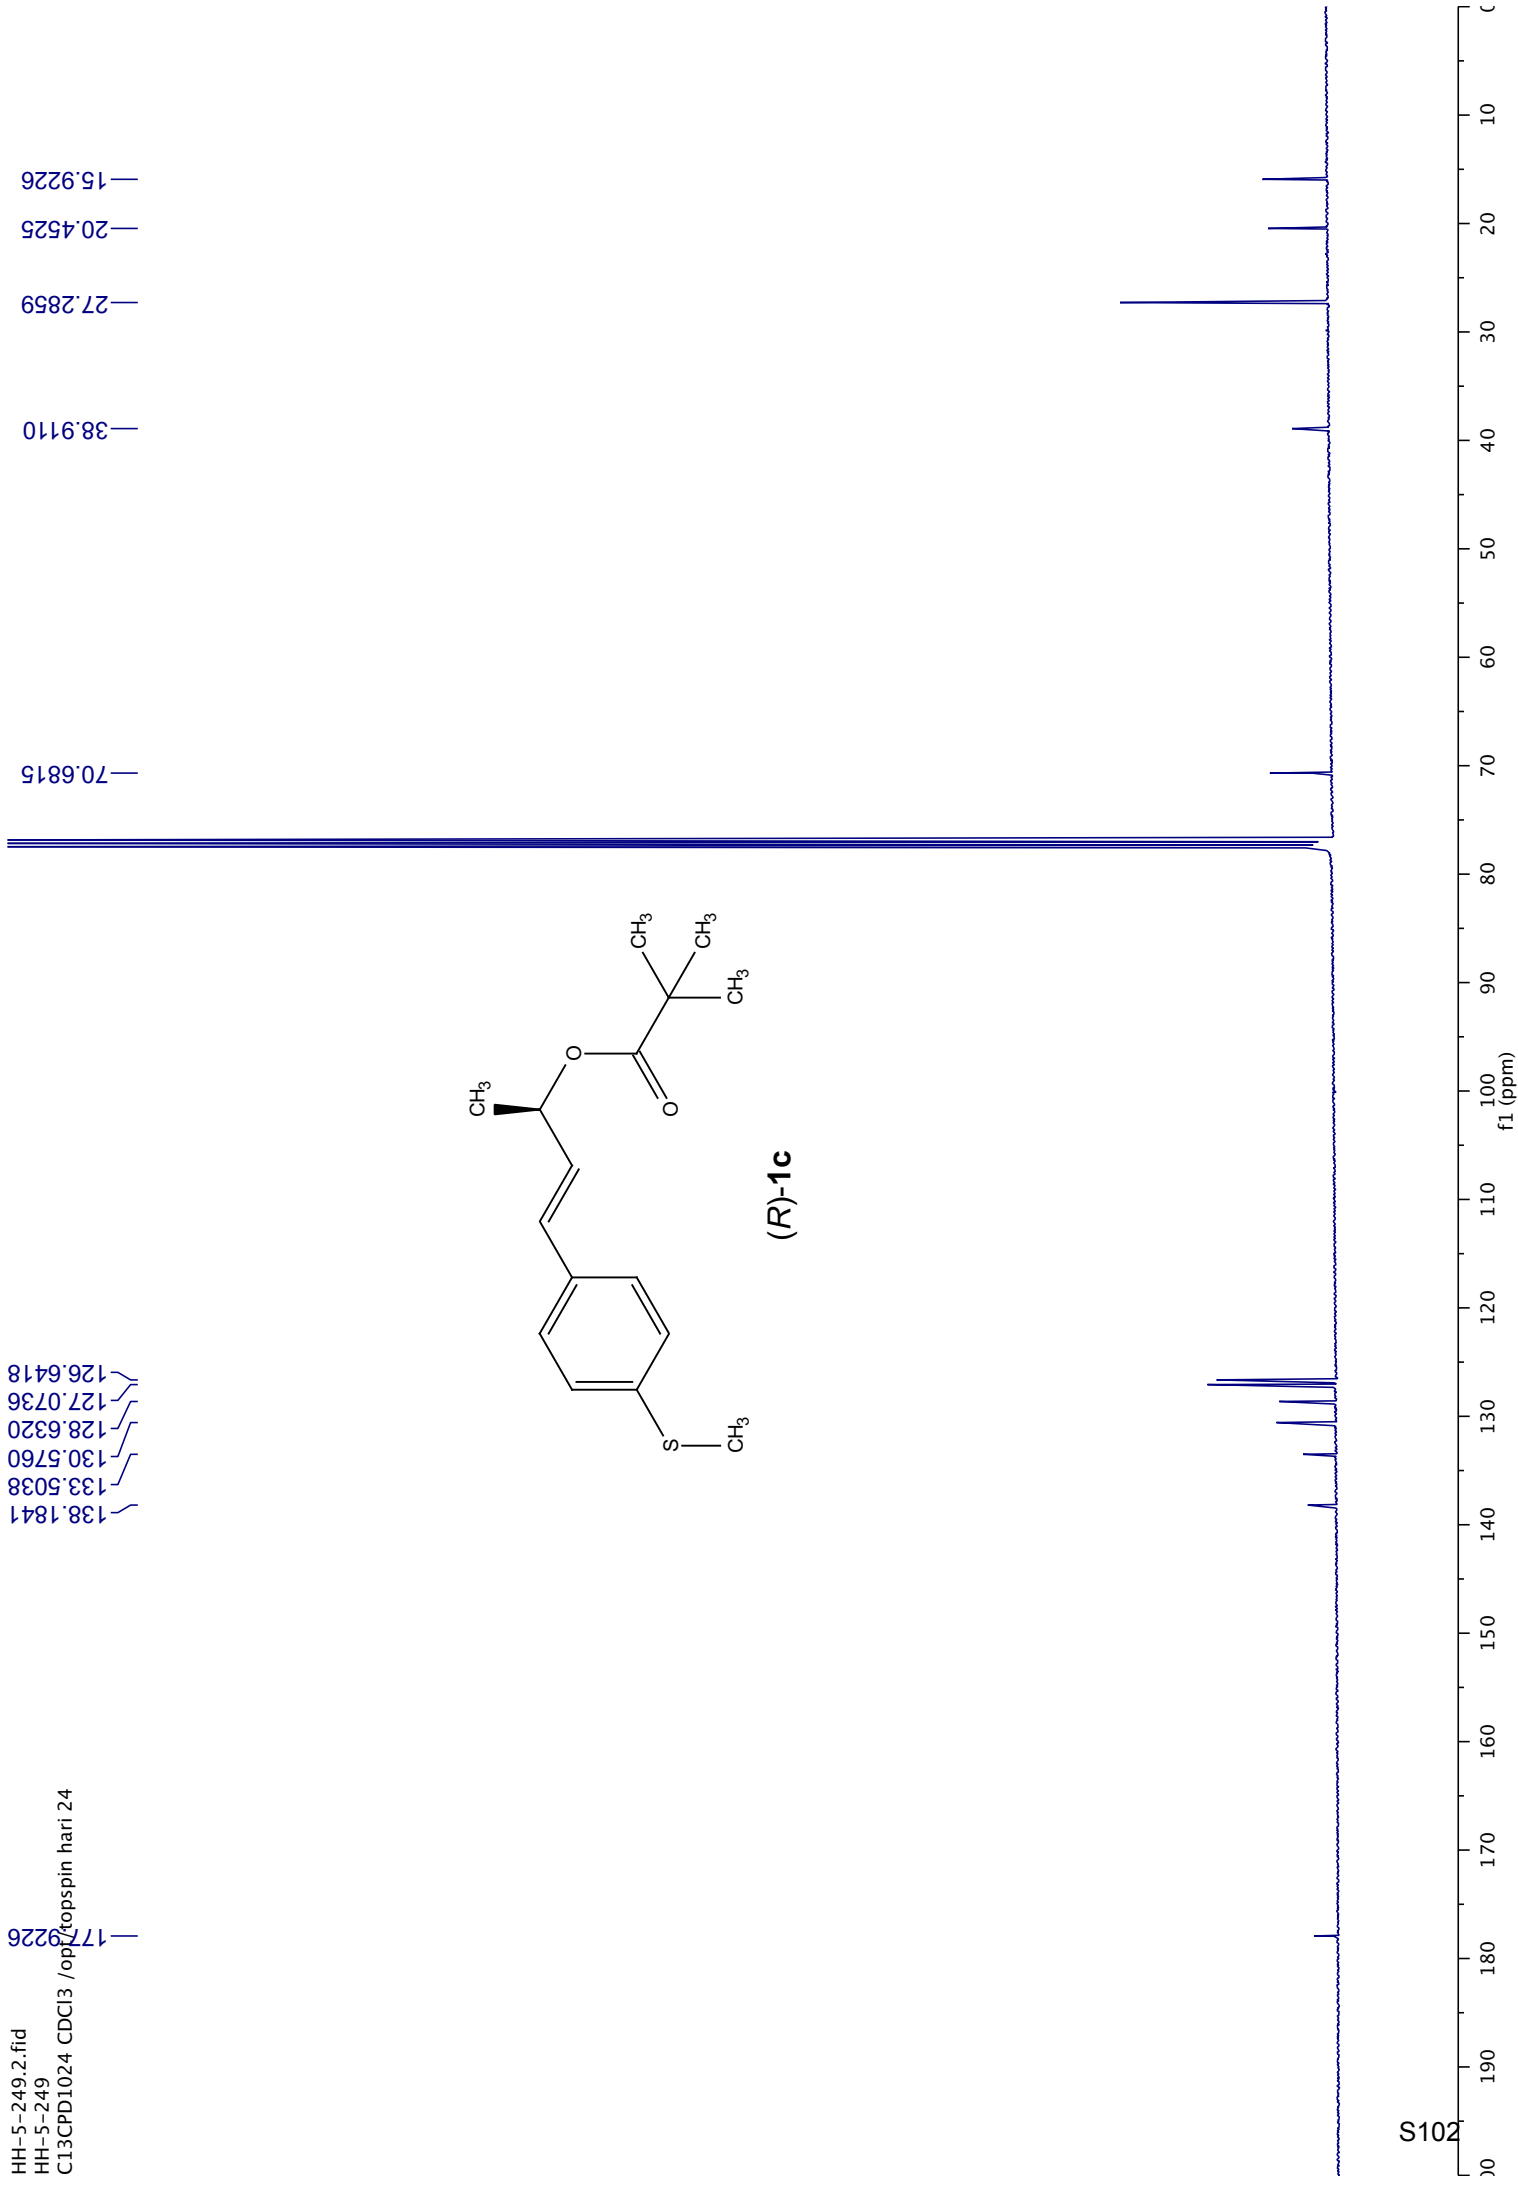

QZ-6-222-1.3.ftid  
QZ-6-222-1  
PROTON\_16 CDCl3

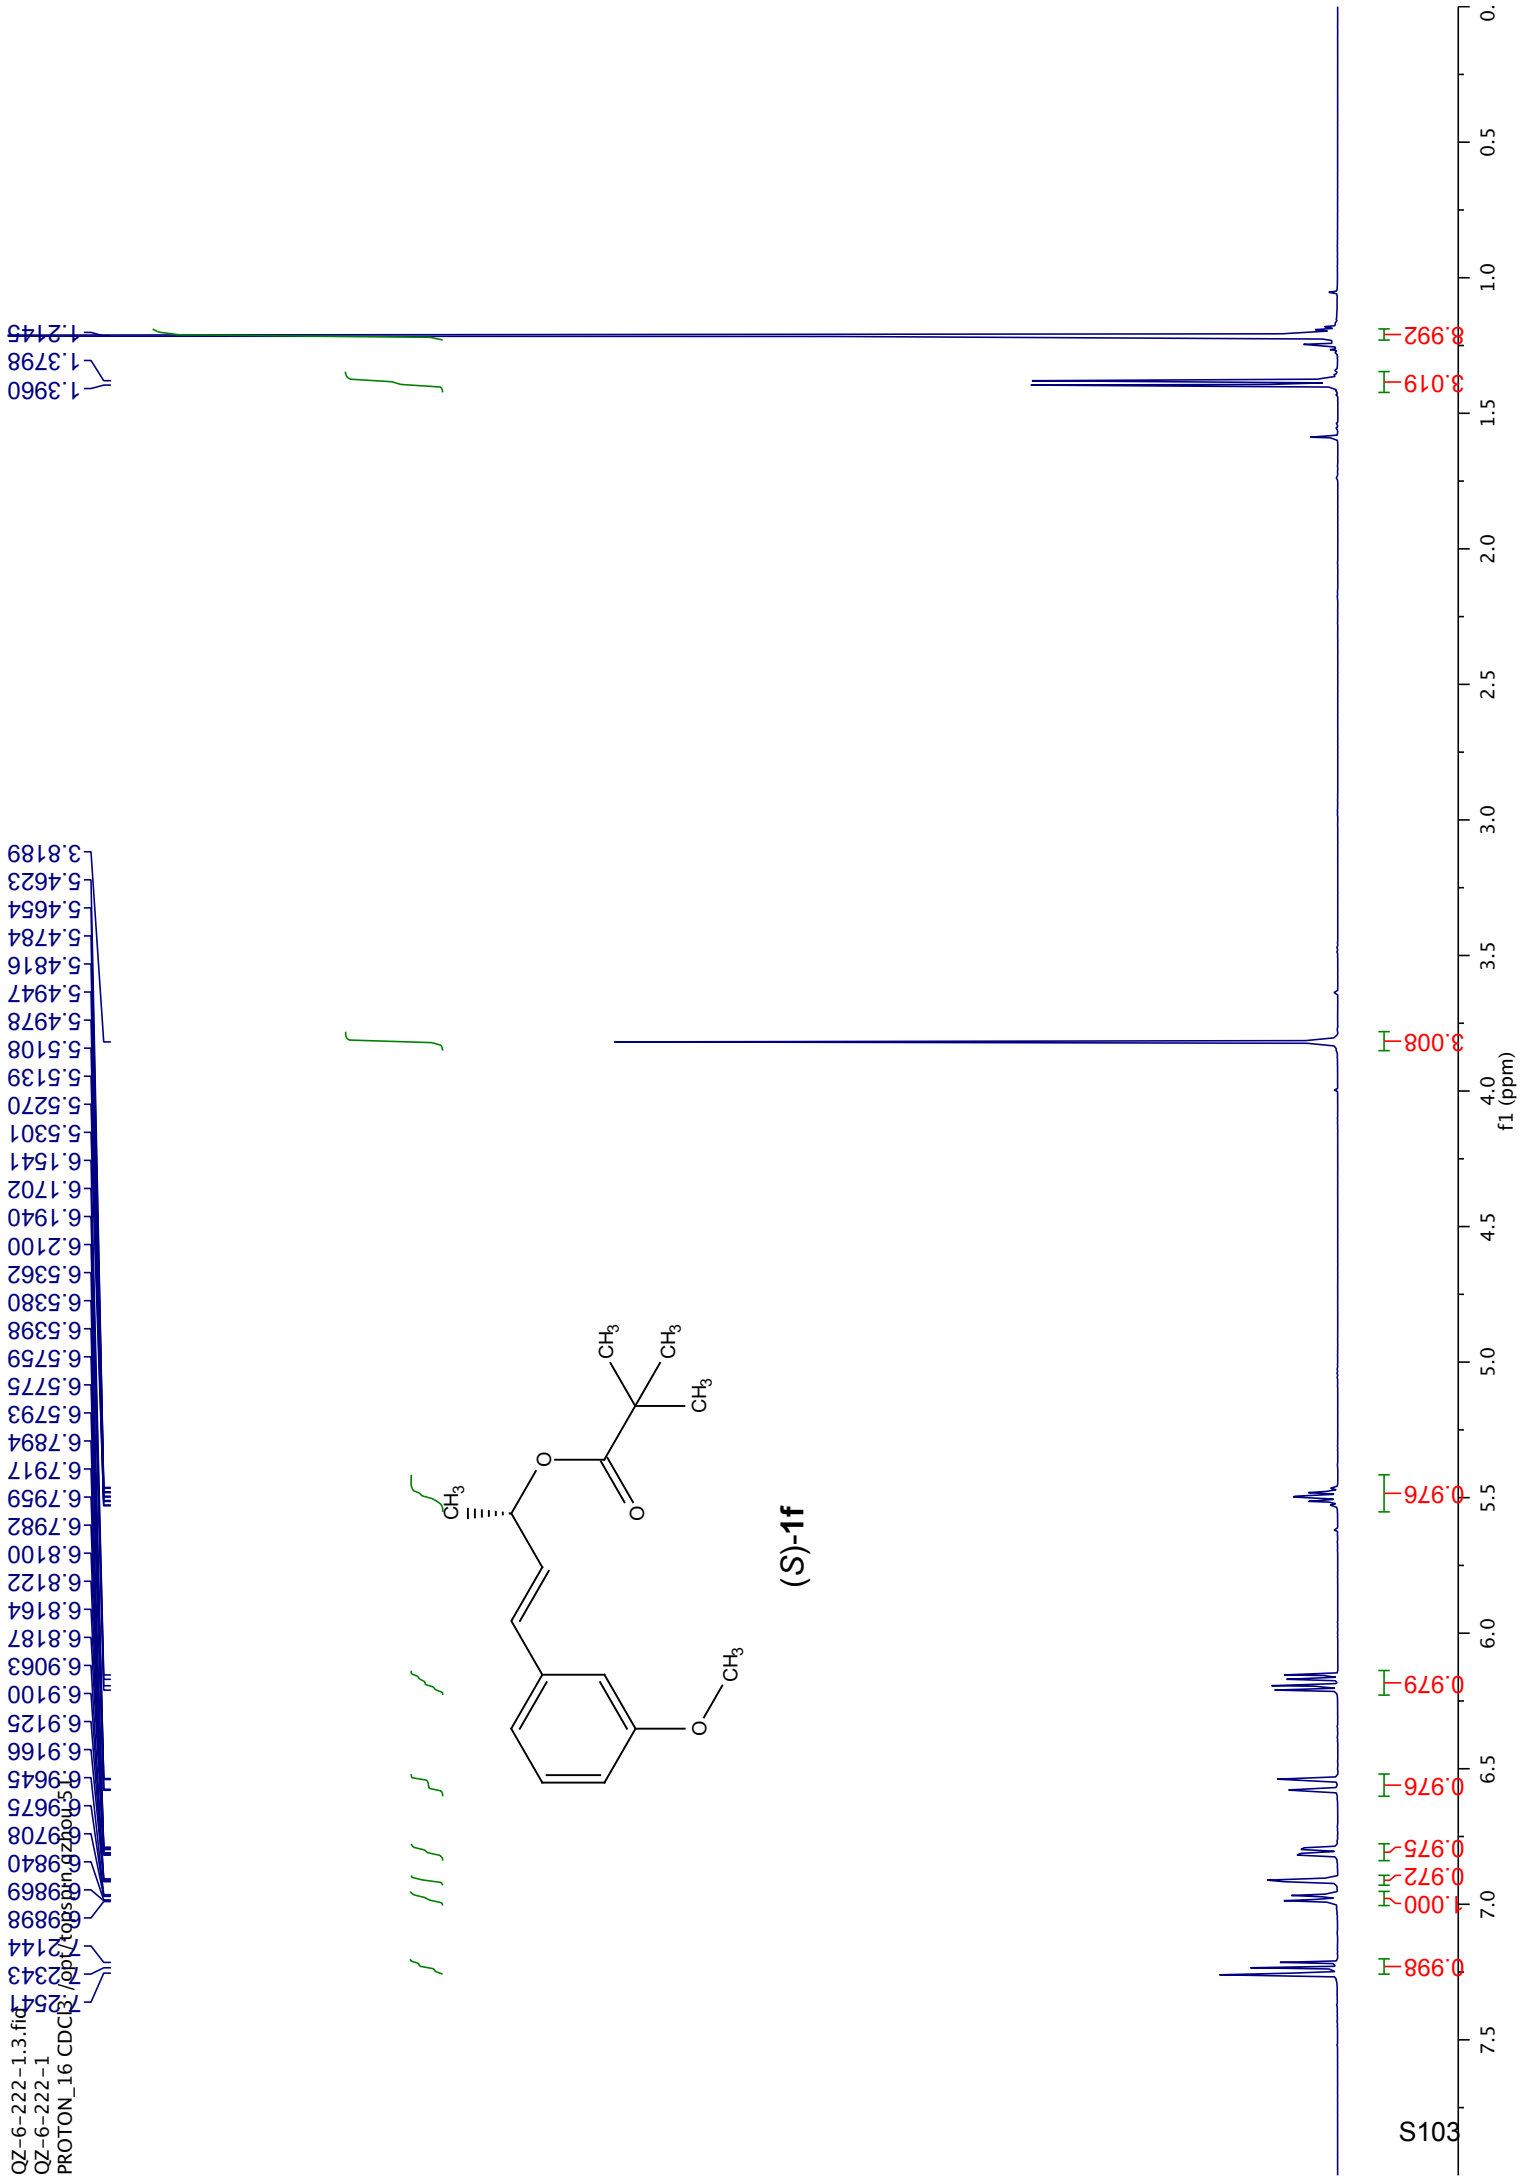

S103

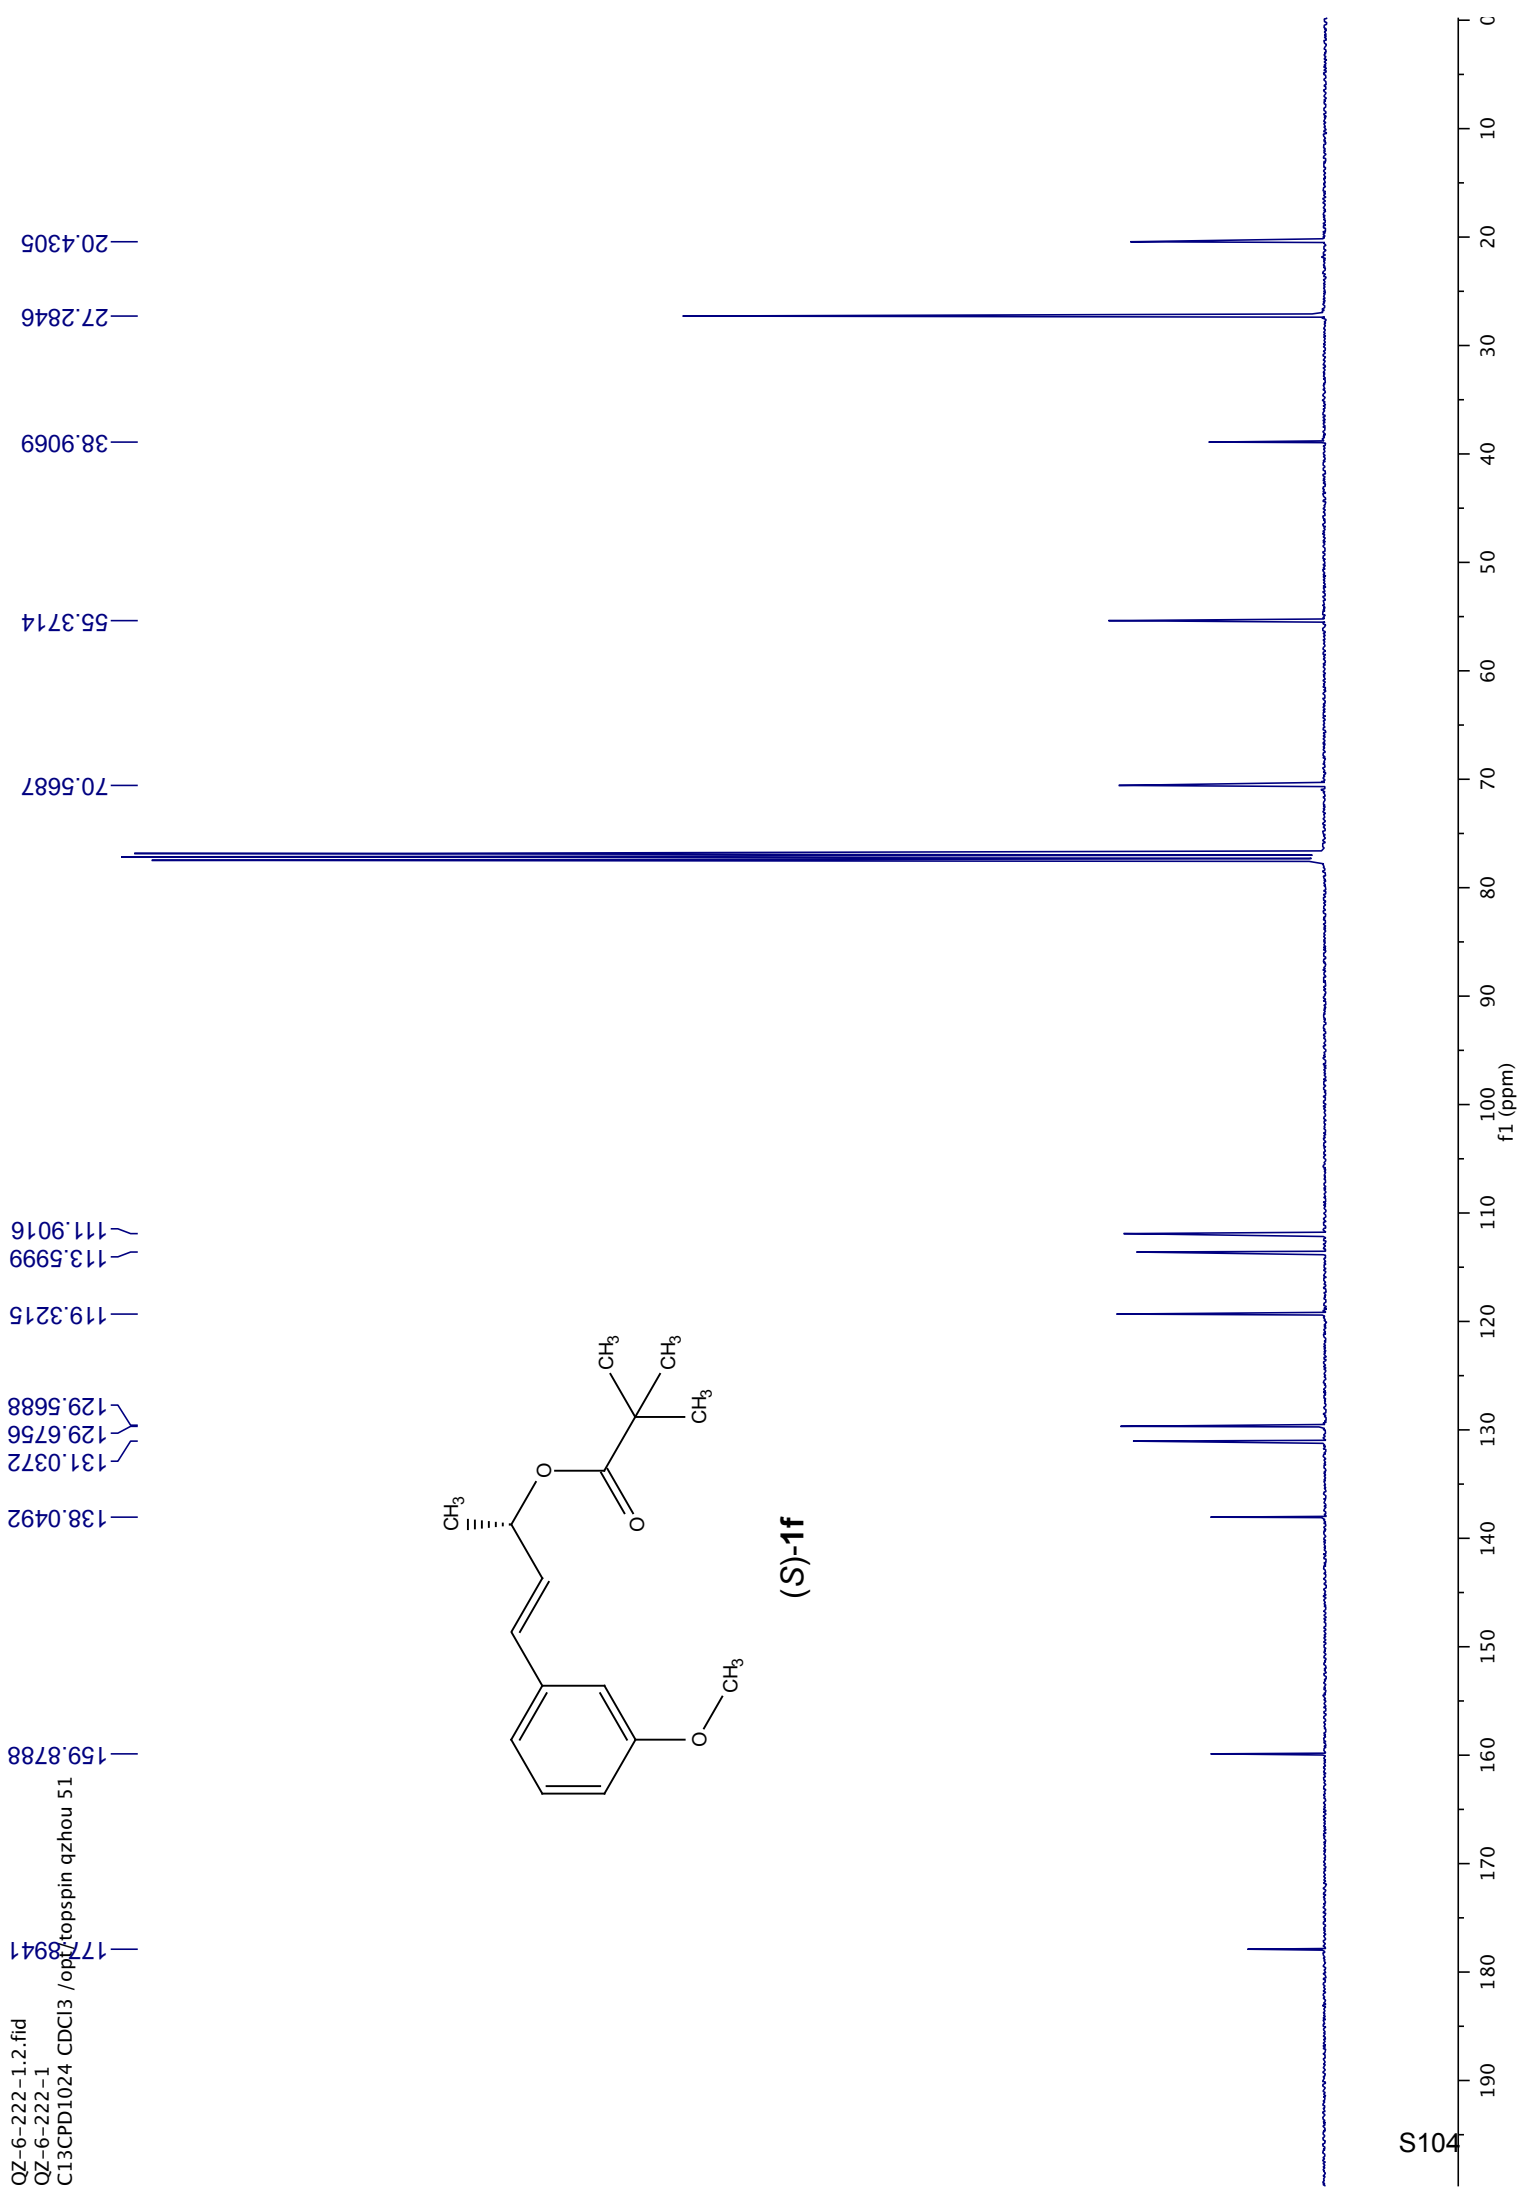



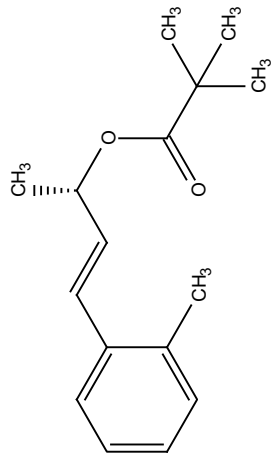

(S)-1g

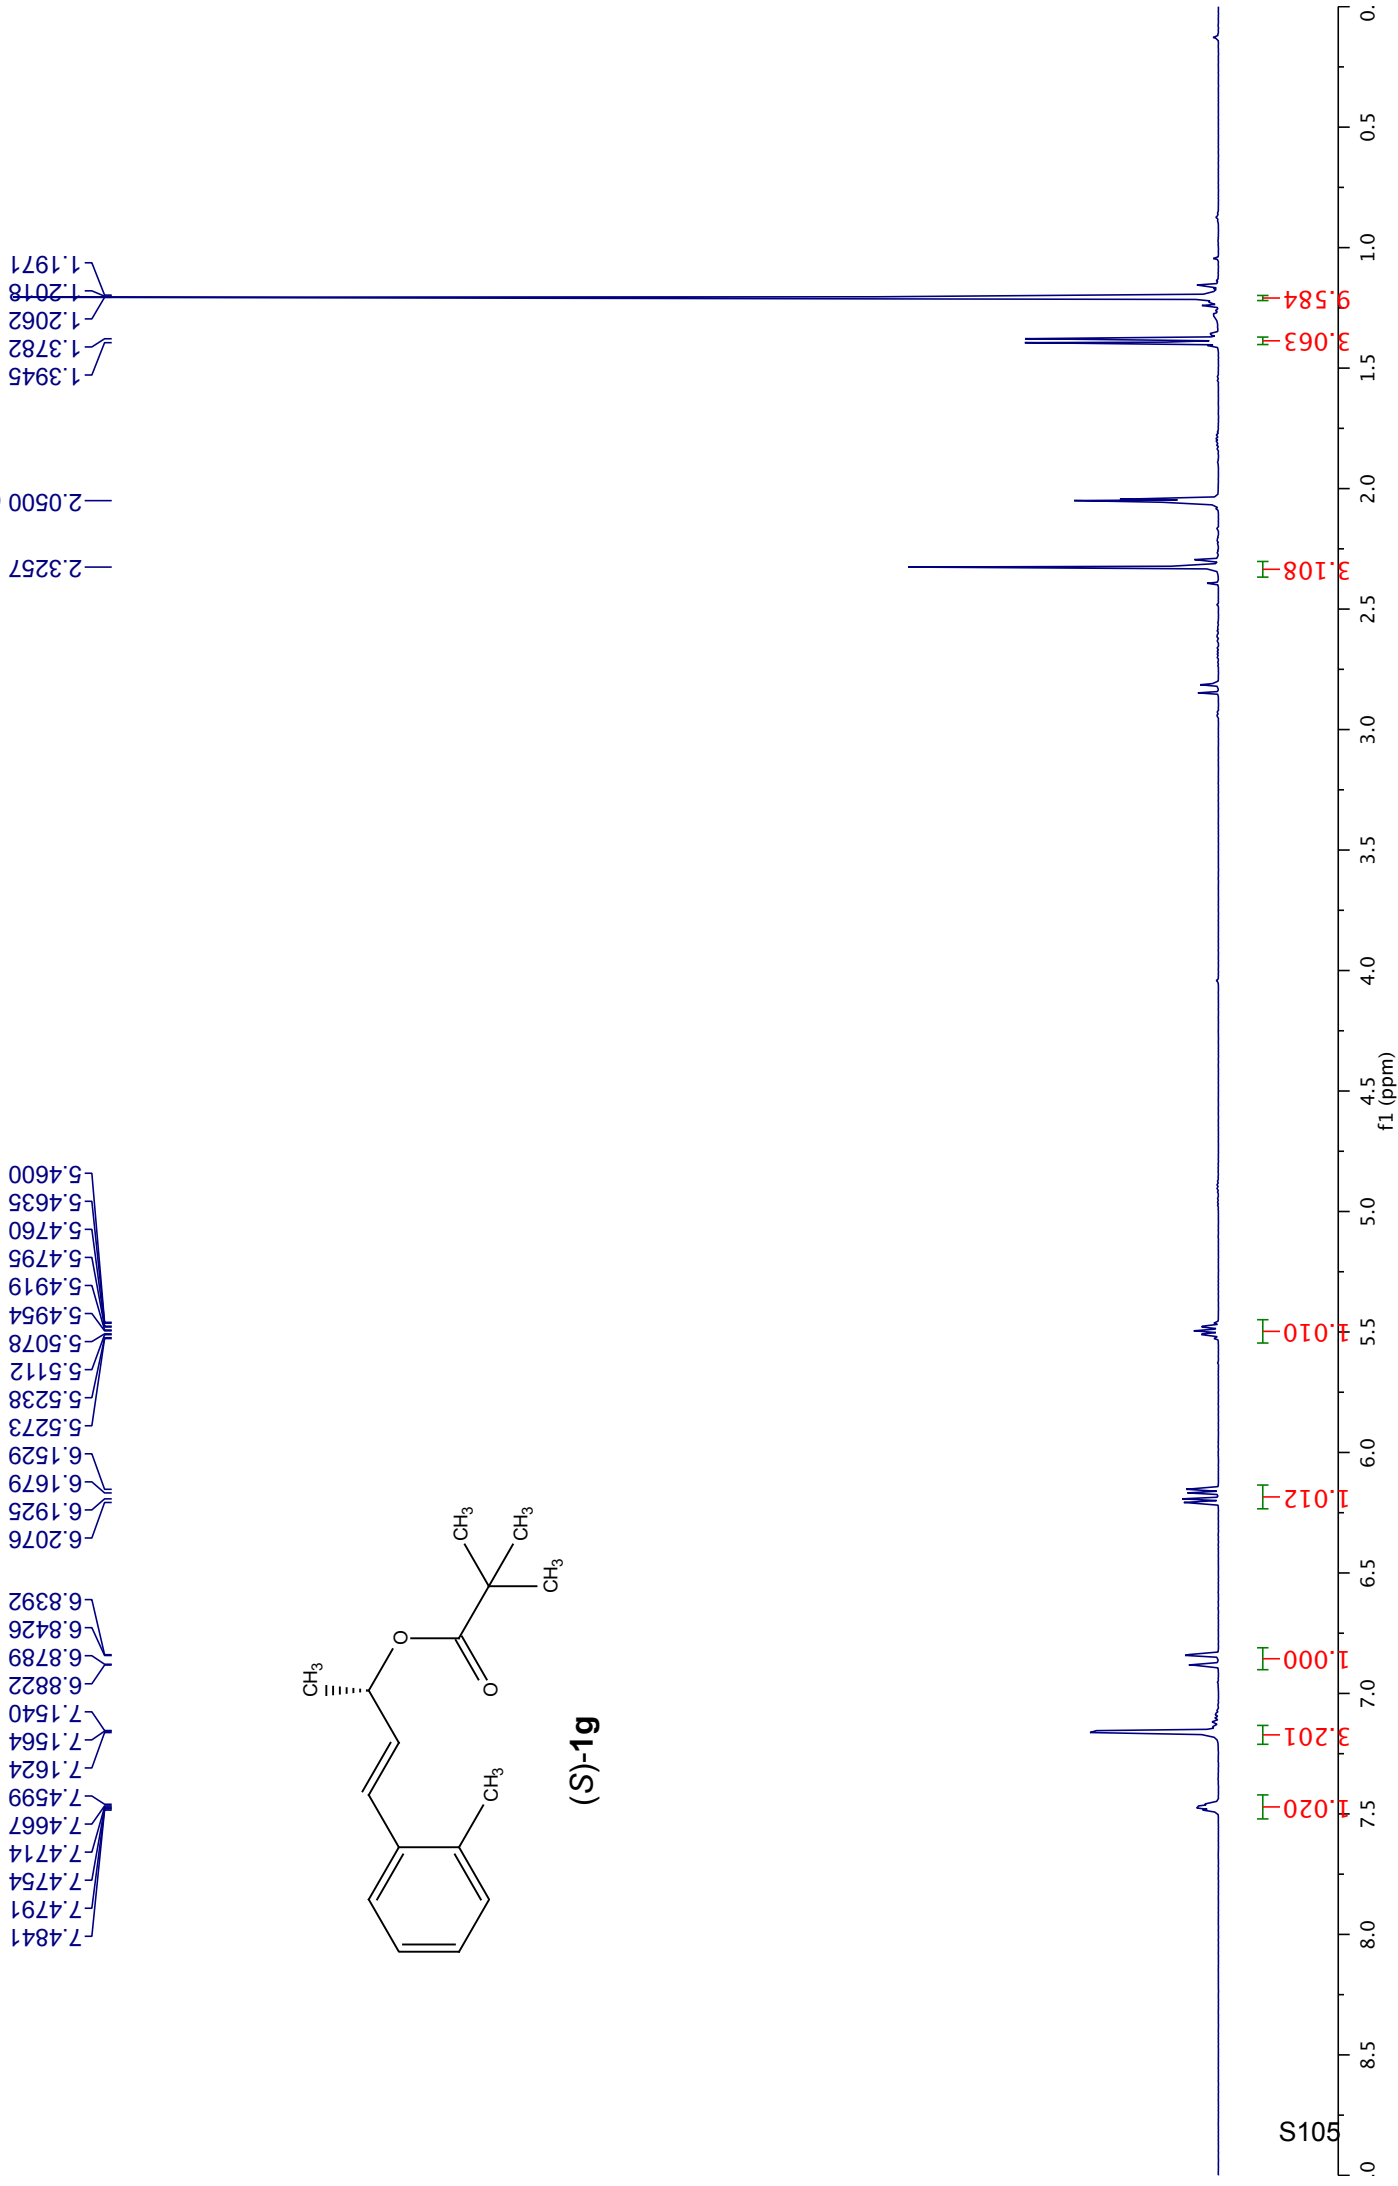

2.0500 (CD<sub>3</sub>)<sub>2</sub>CO  
2.3257

HH-5-2001801 June.2.fid  
HH-5-2001801 June  
C13CPD102 Acetone /opt/topspin hari 6

206.2600  
177.5262  
136.5309  
136.3524  
131.5837  
131.1907  
129.0637  
128.6013  
127.0793  
126.3966  
71.2105  
39.3479  
27.5118  
20.7832  
19.8658

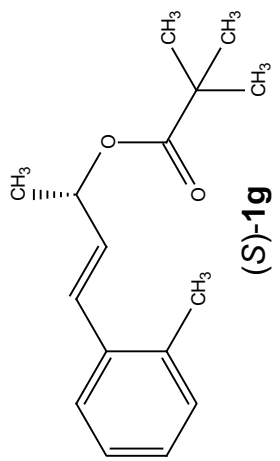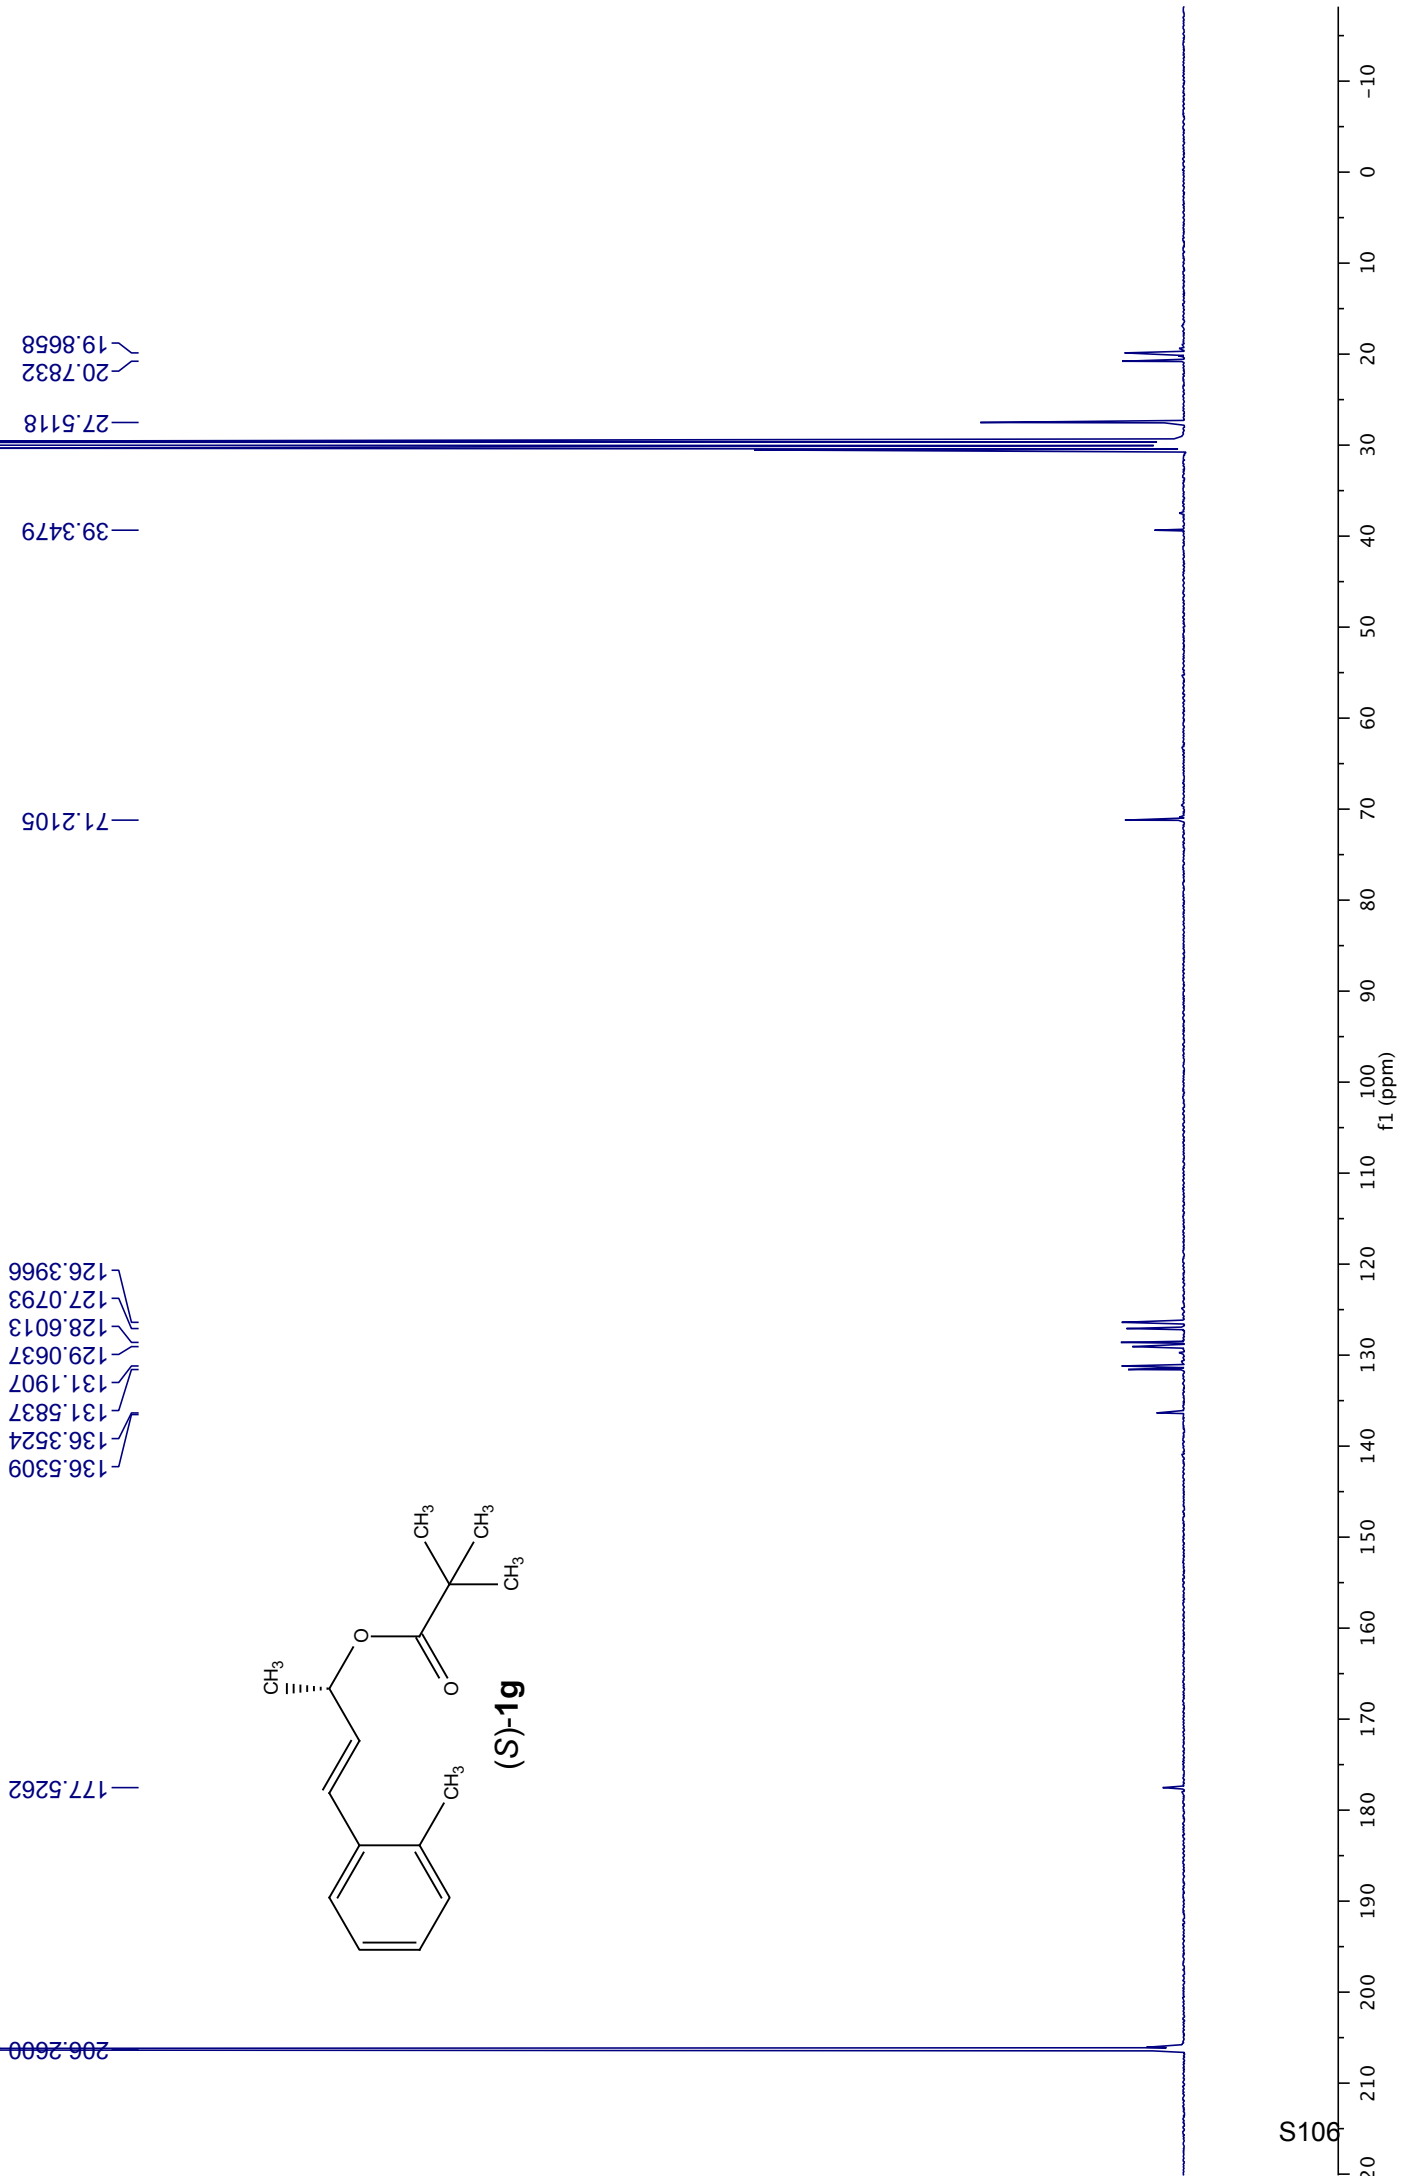



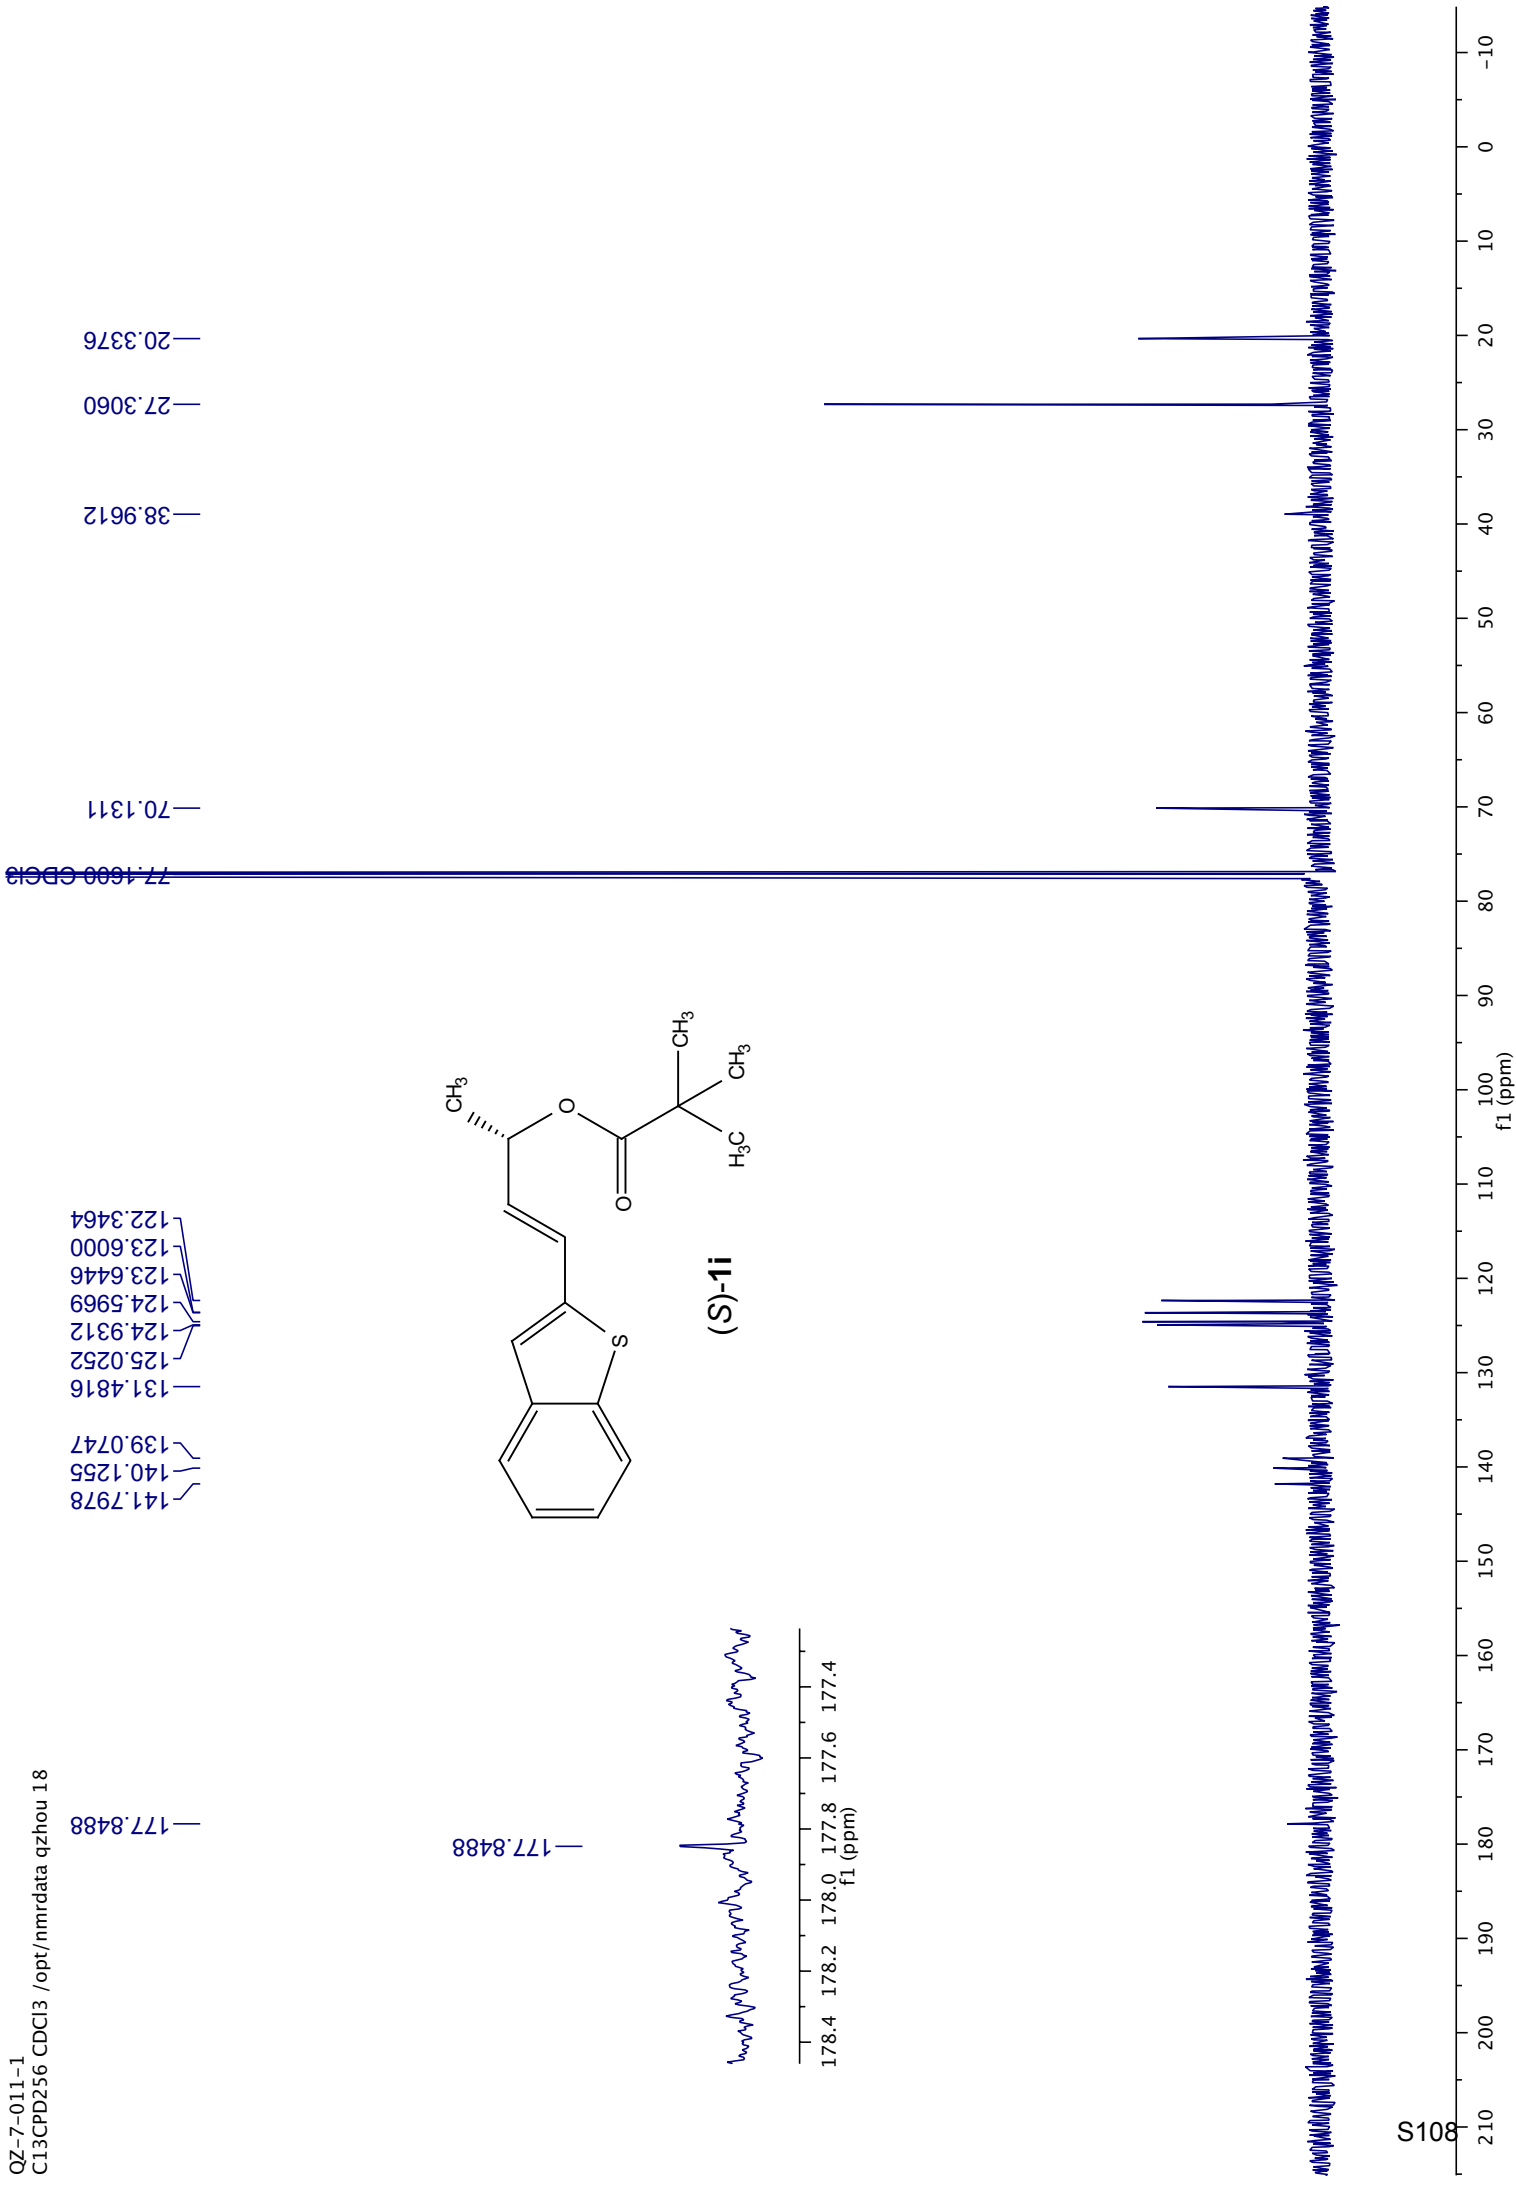

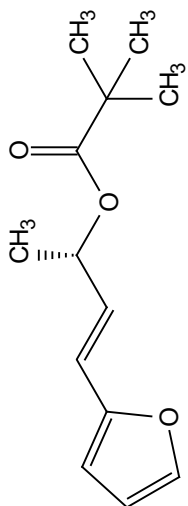

(S)-1j

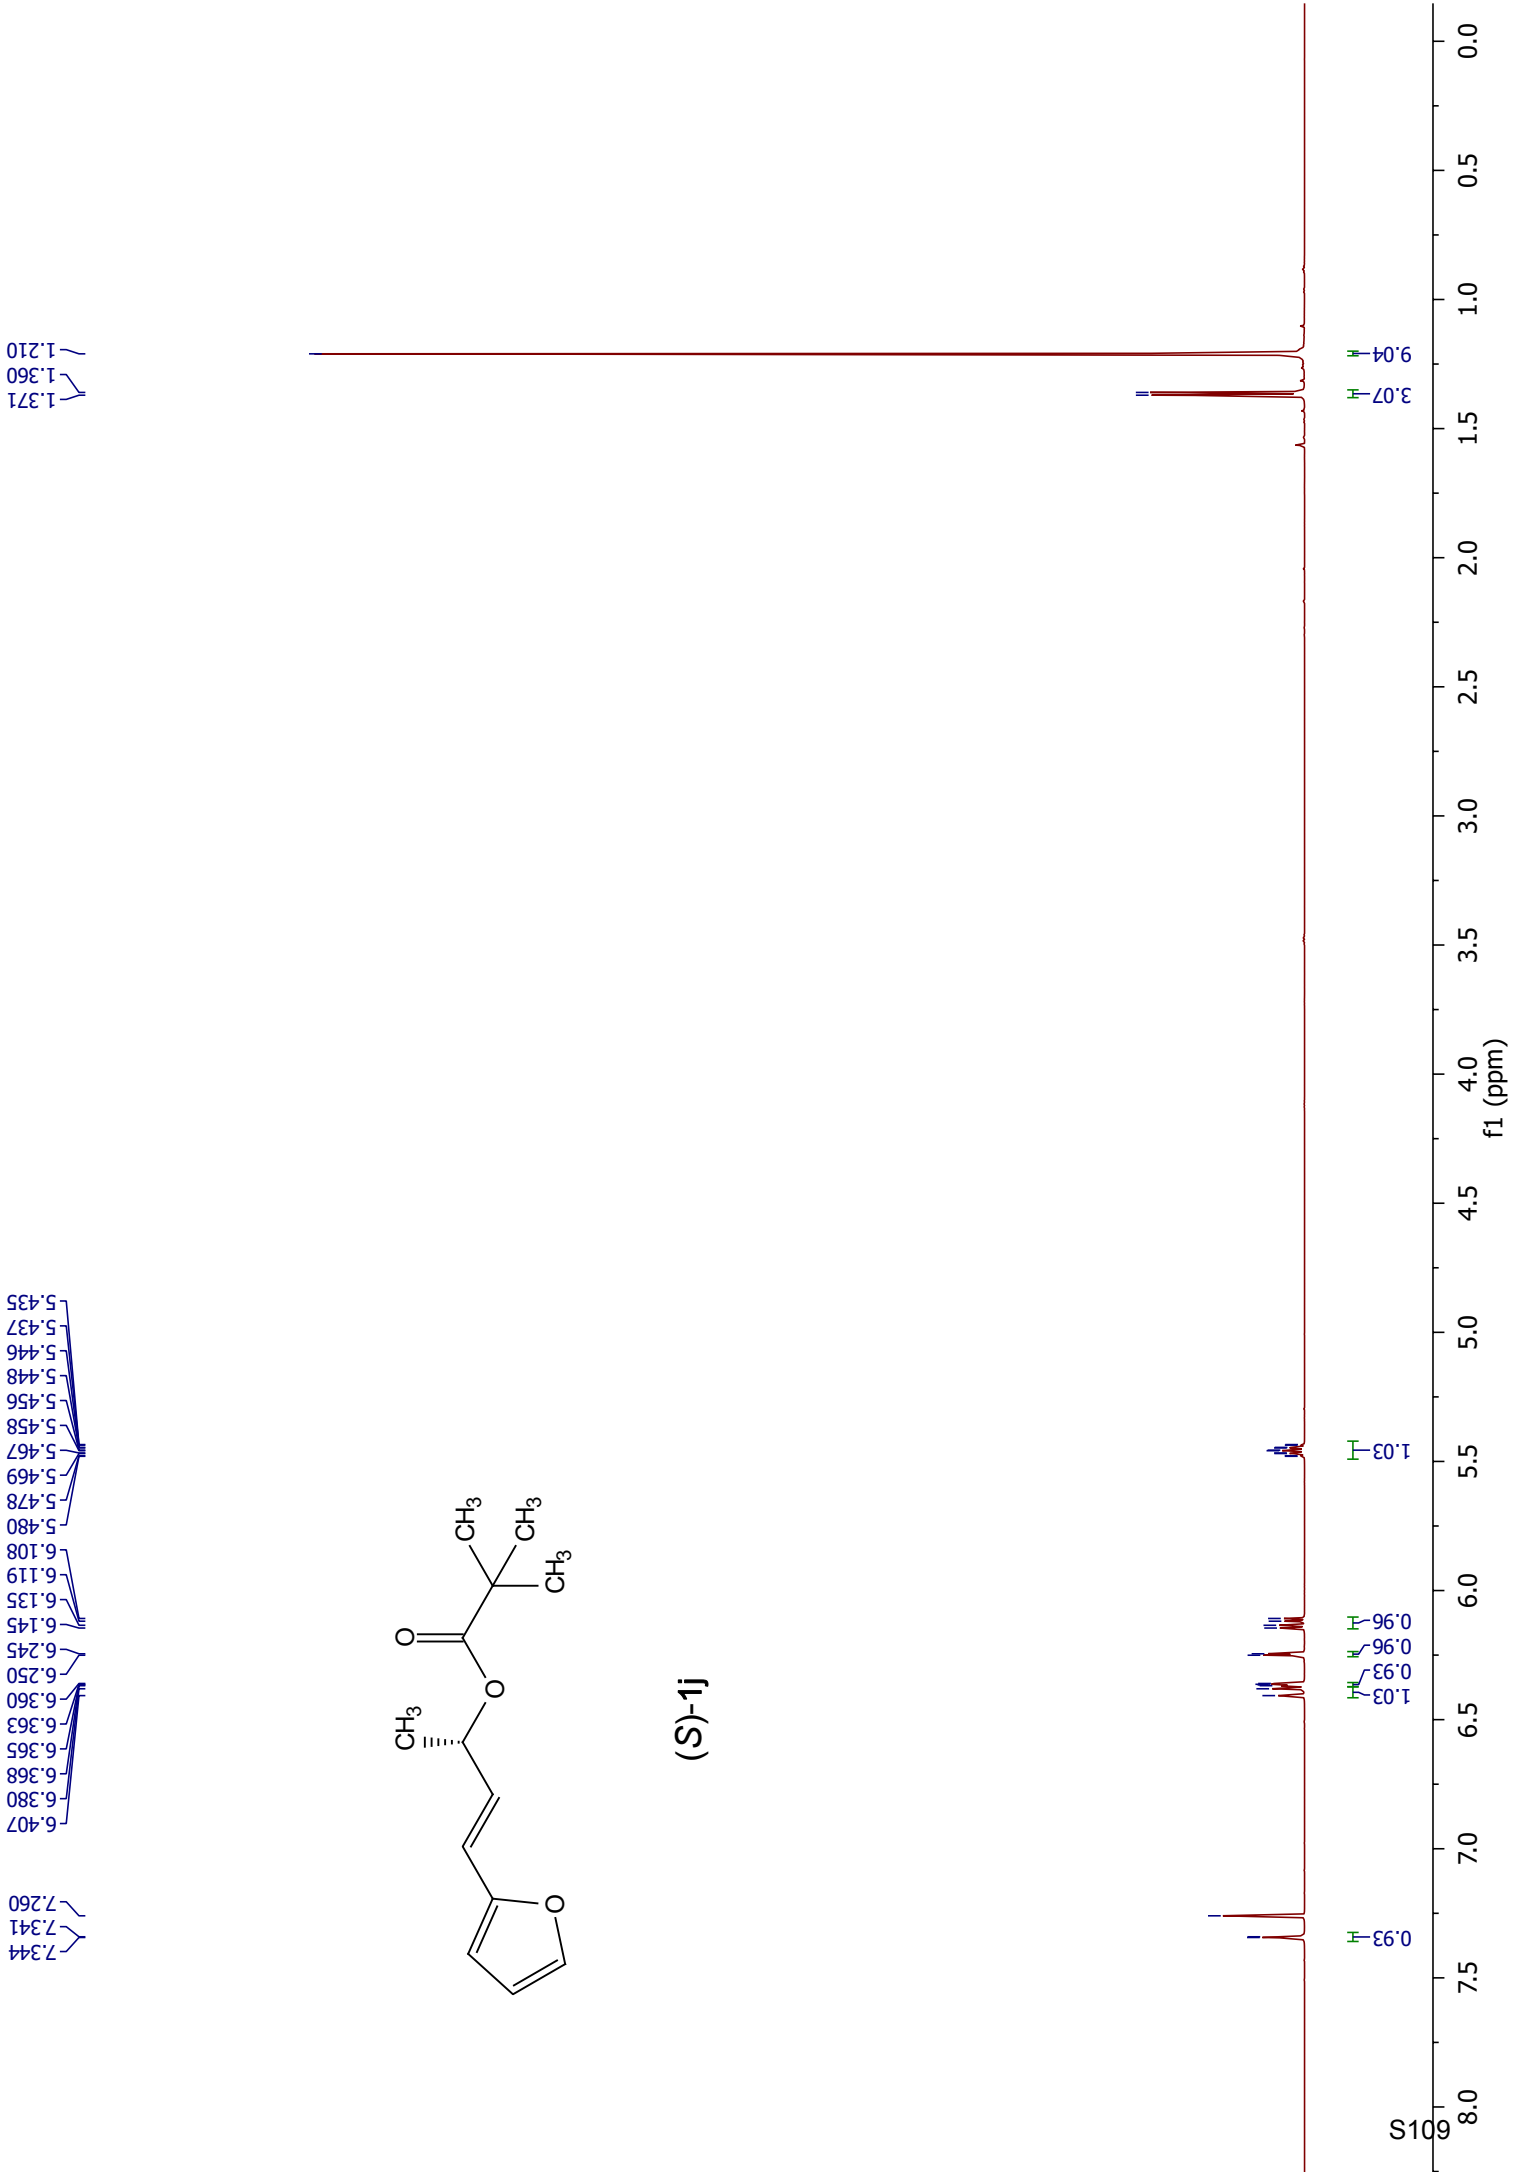

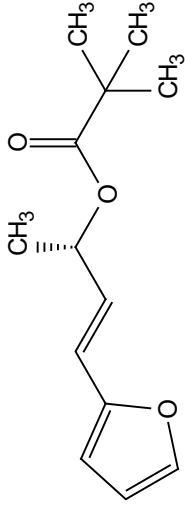

(S)-1j

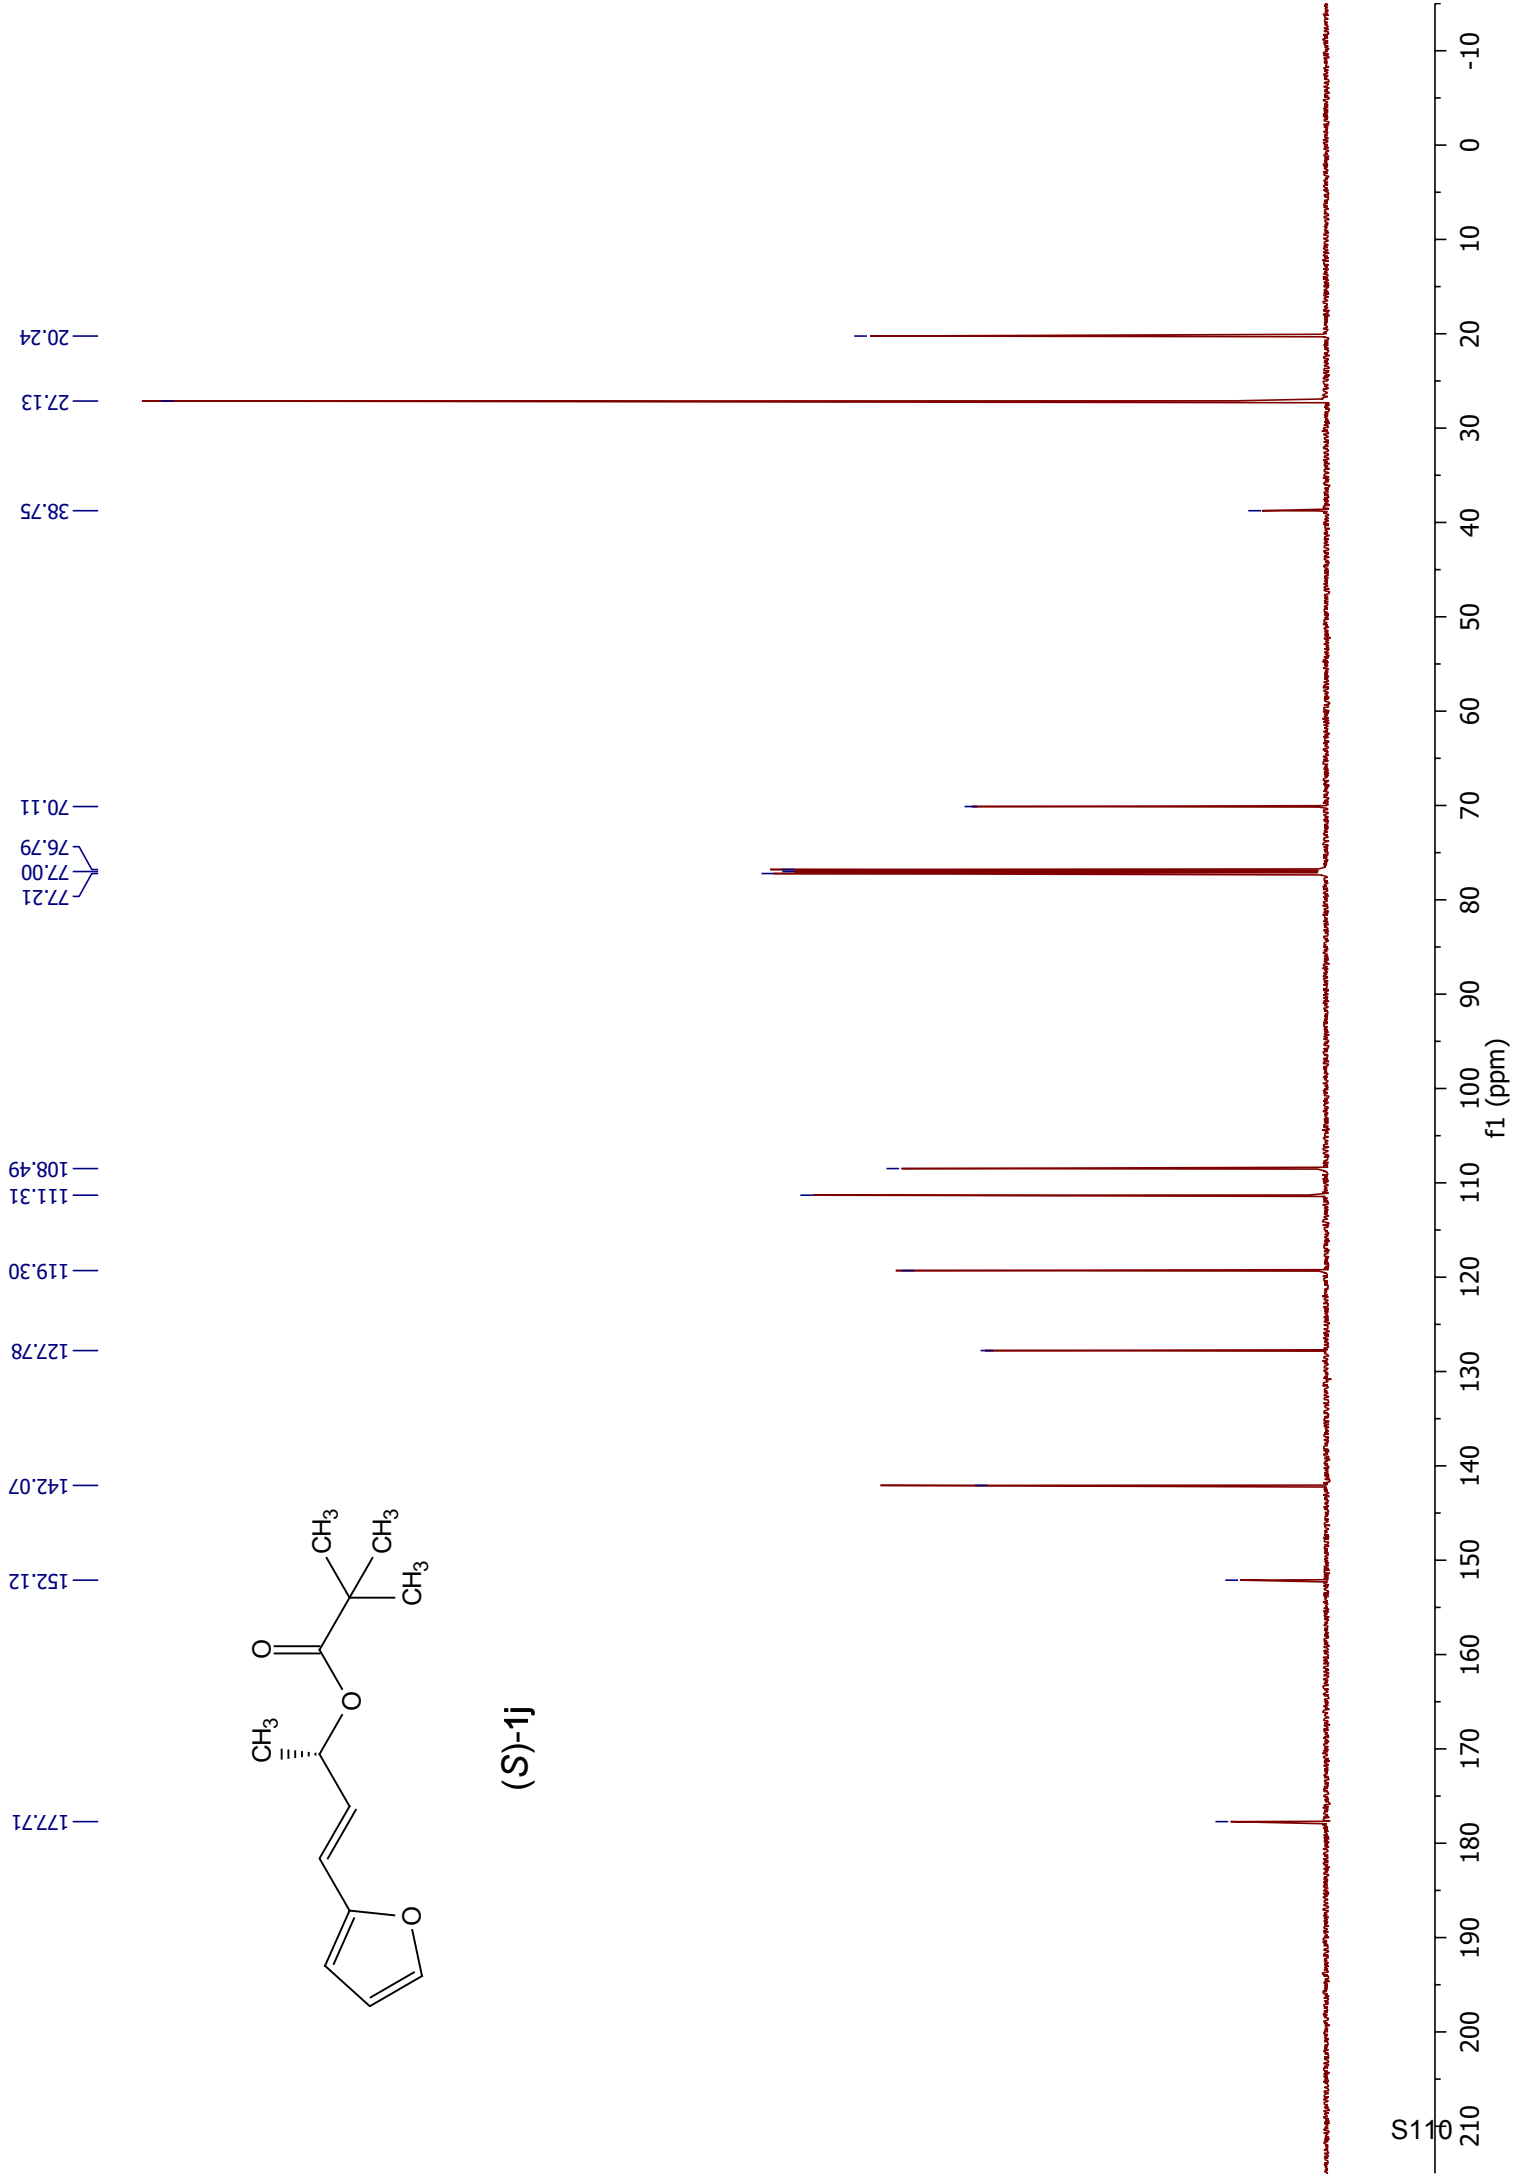

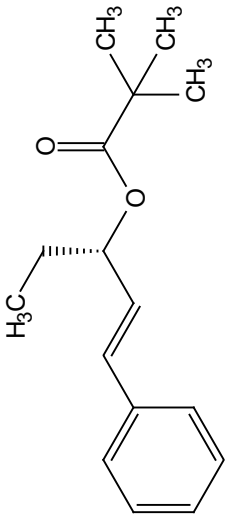

(S)-1k

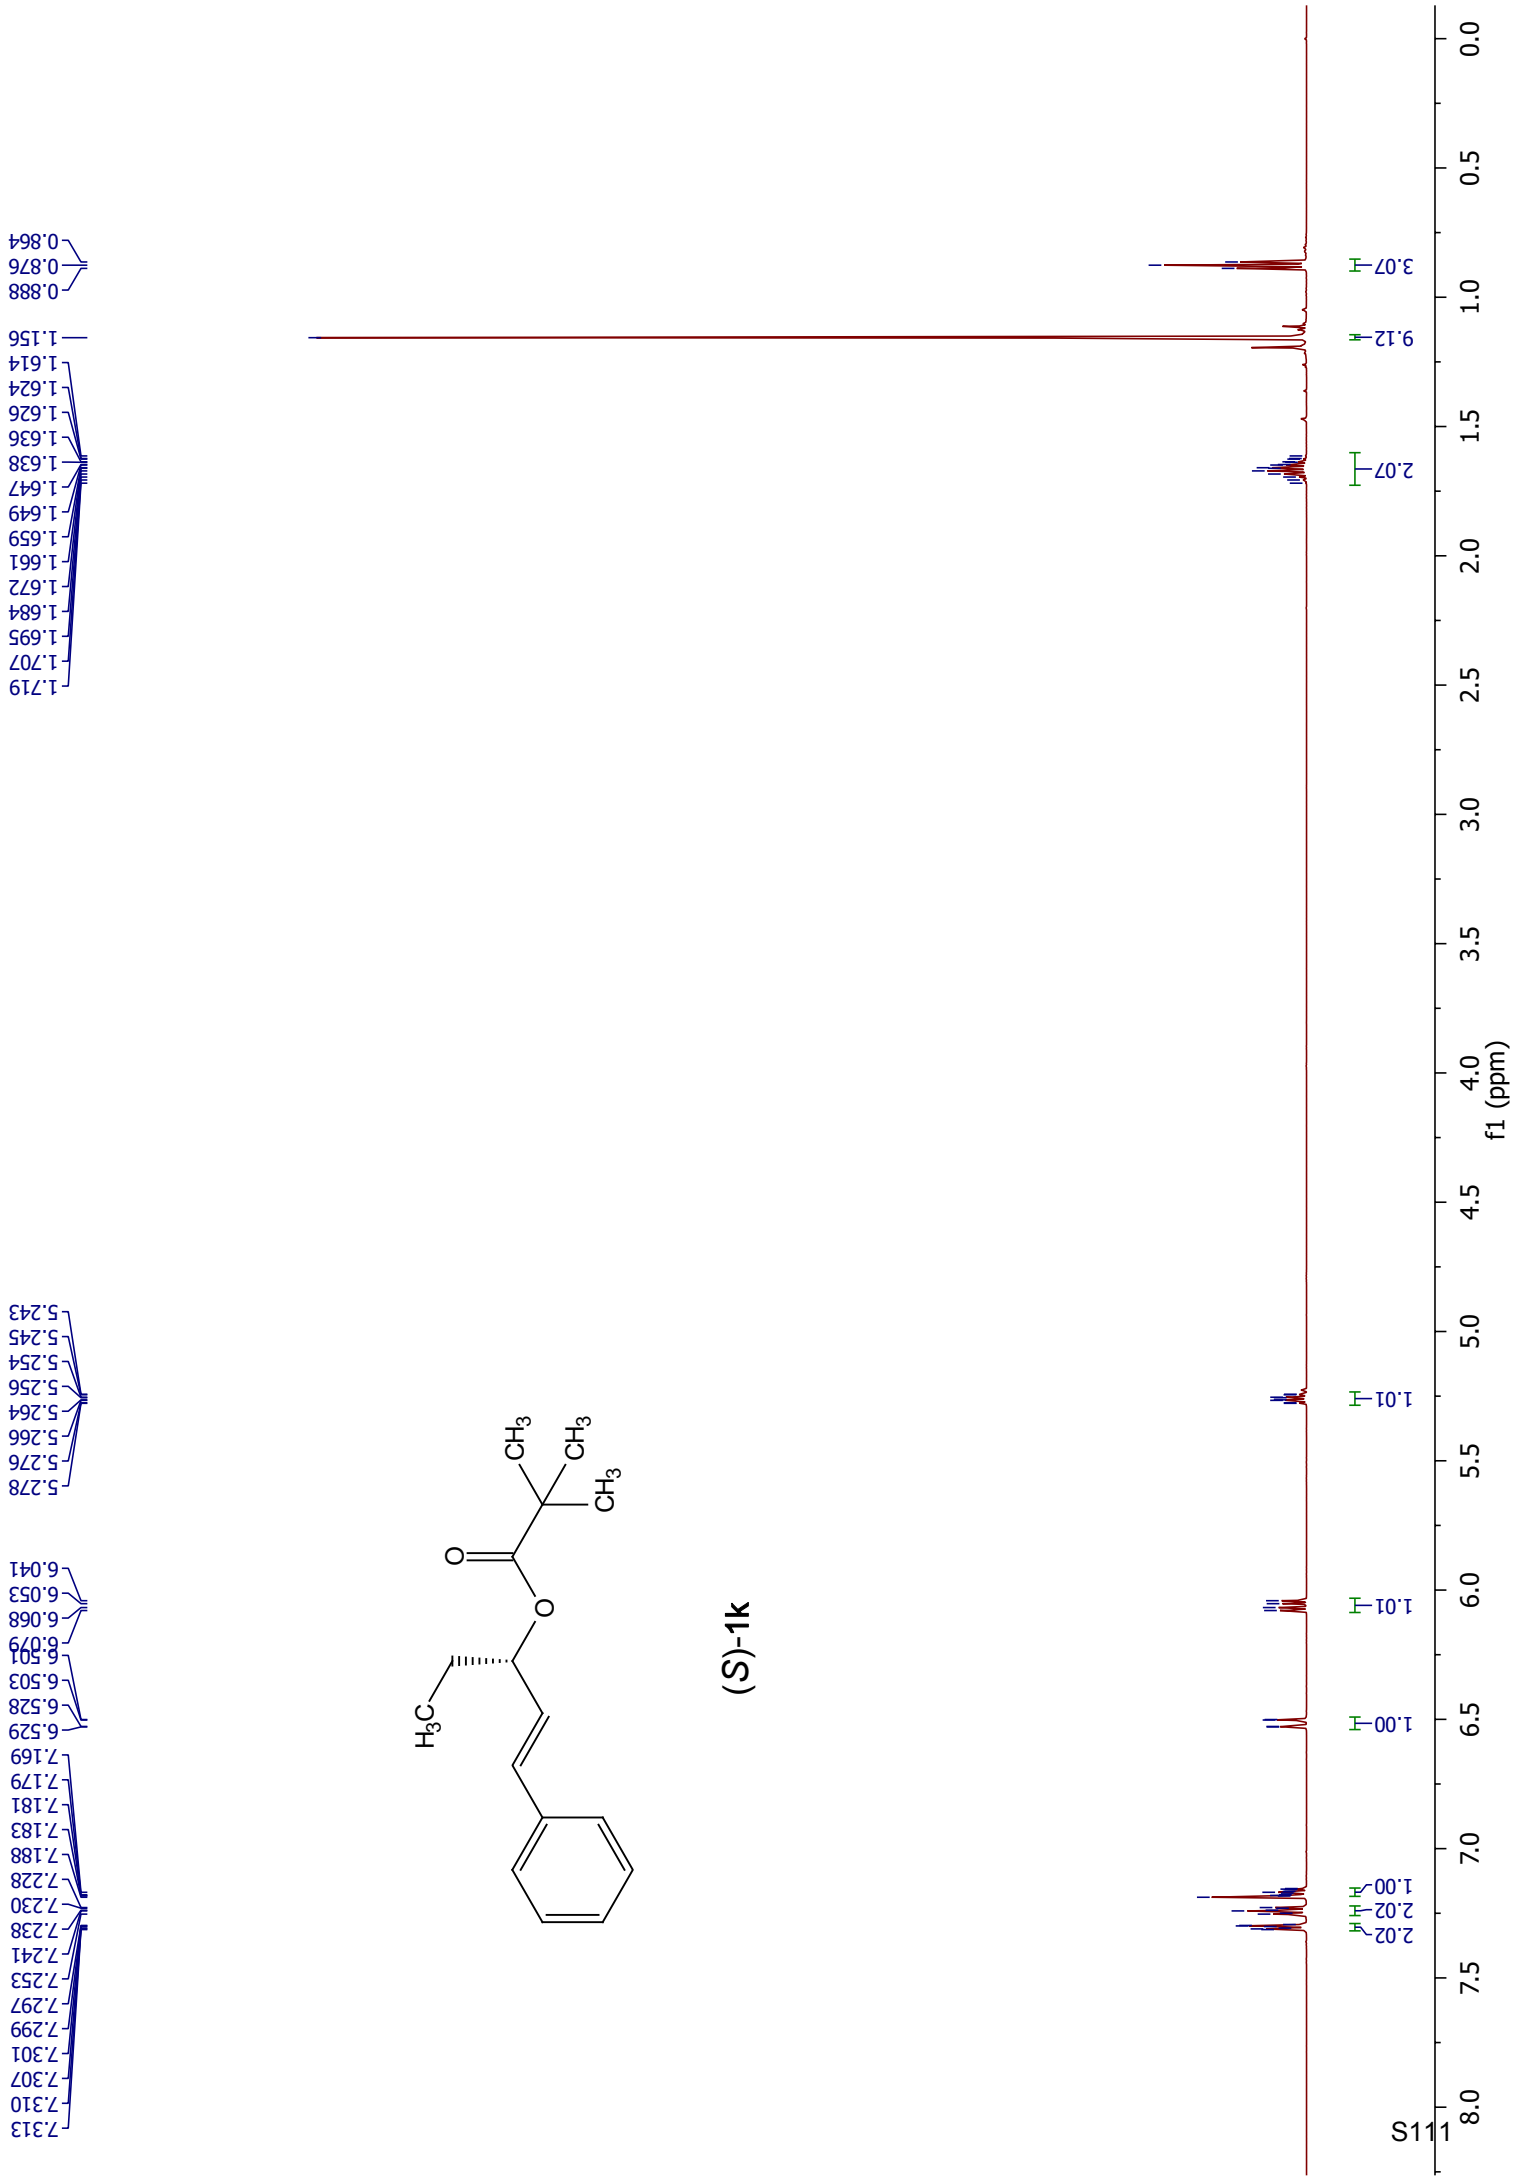

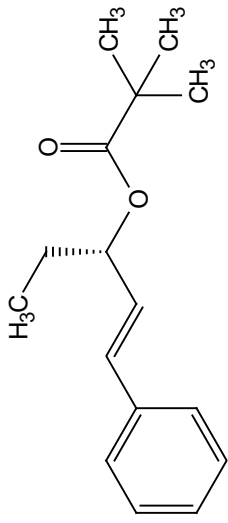

(S)-1k

177.817  
136.584  
131.943  
128.548  
127.886  
127.780  
126.551  
77.231  
77.020  
76.809  
75.356  
38.924  
27.692  
27.215  
9.518

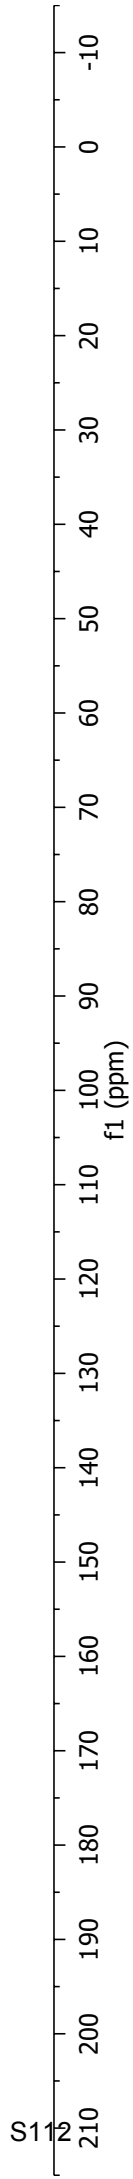



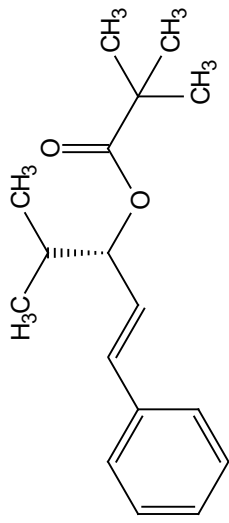

(S)-1I

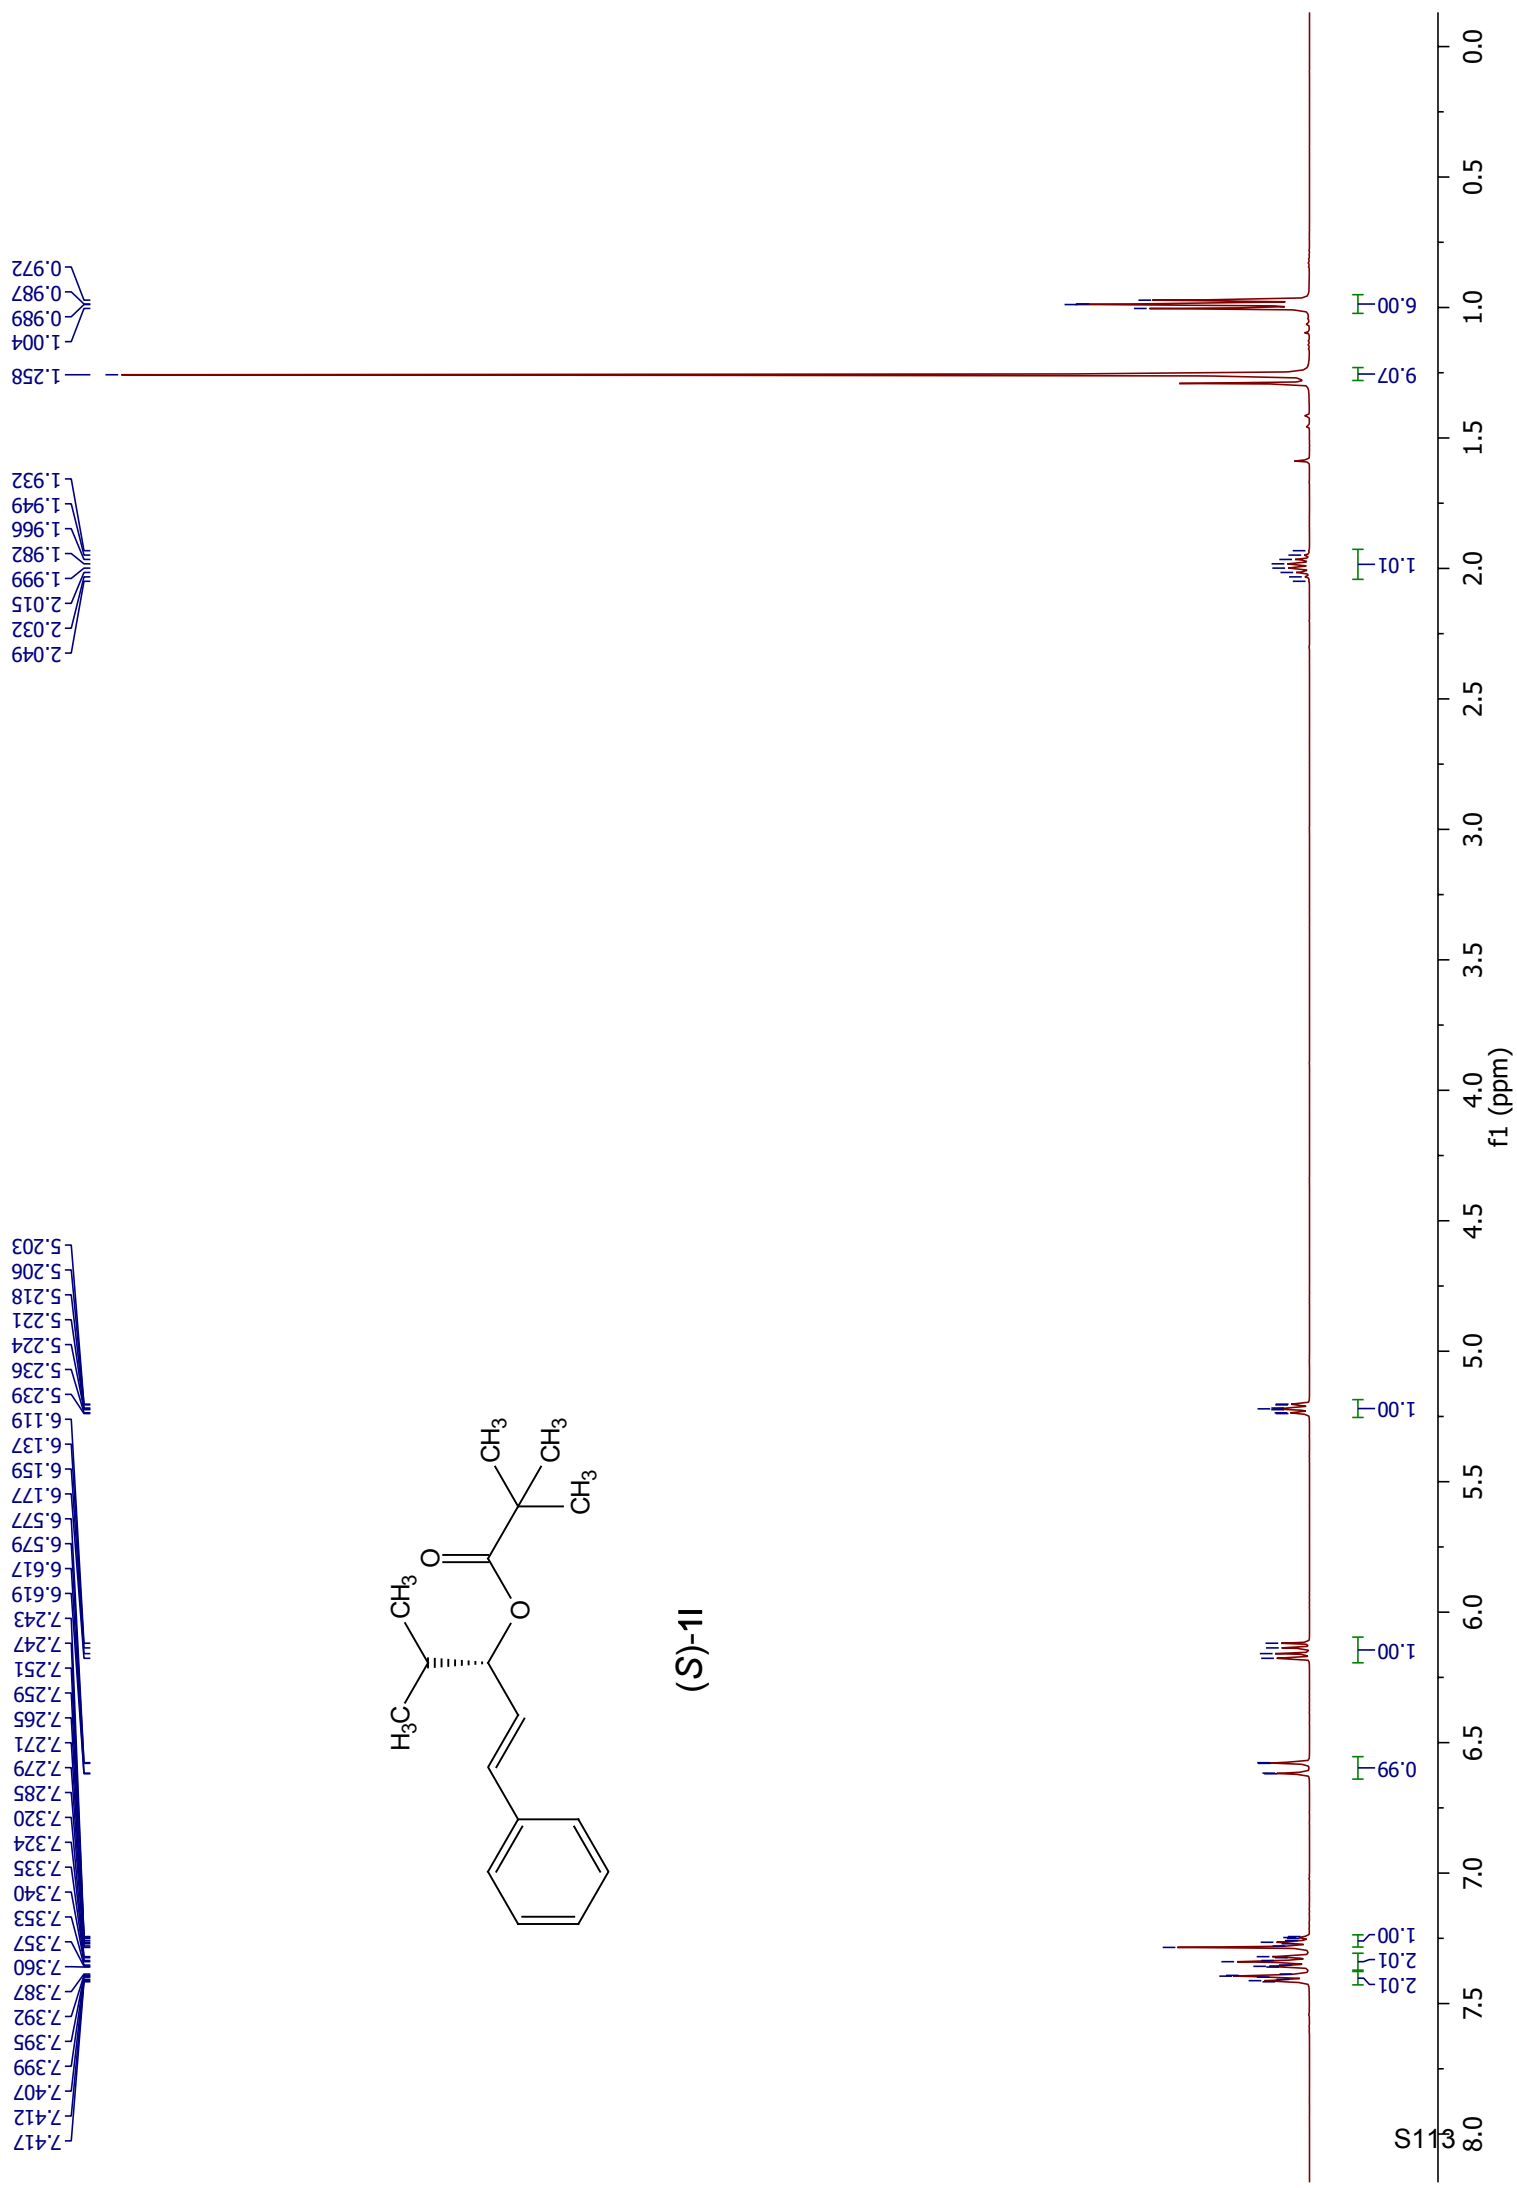

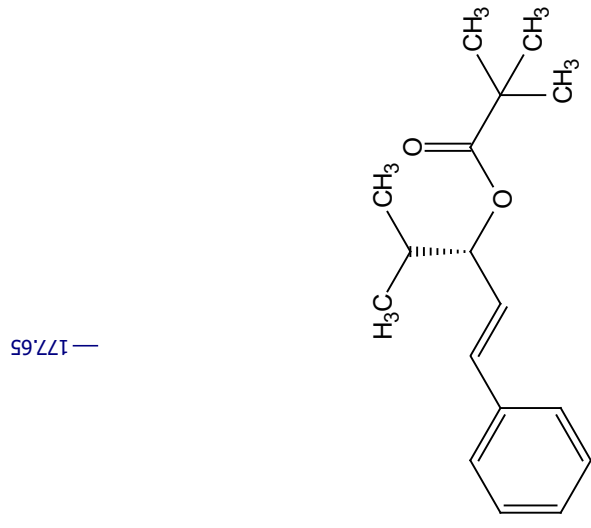

(S)-11

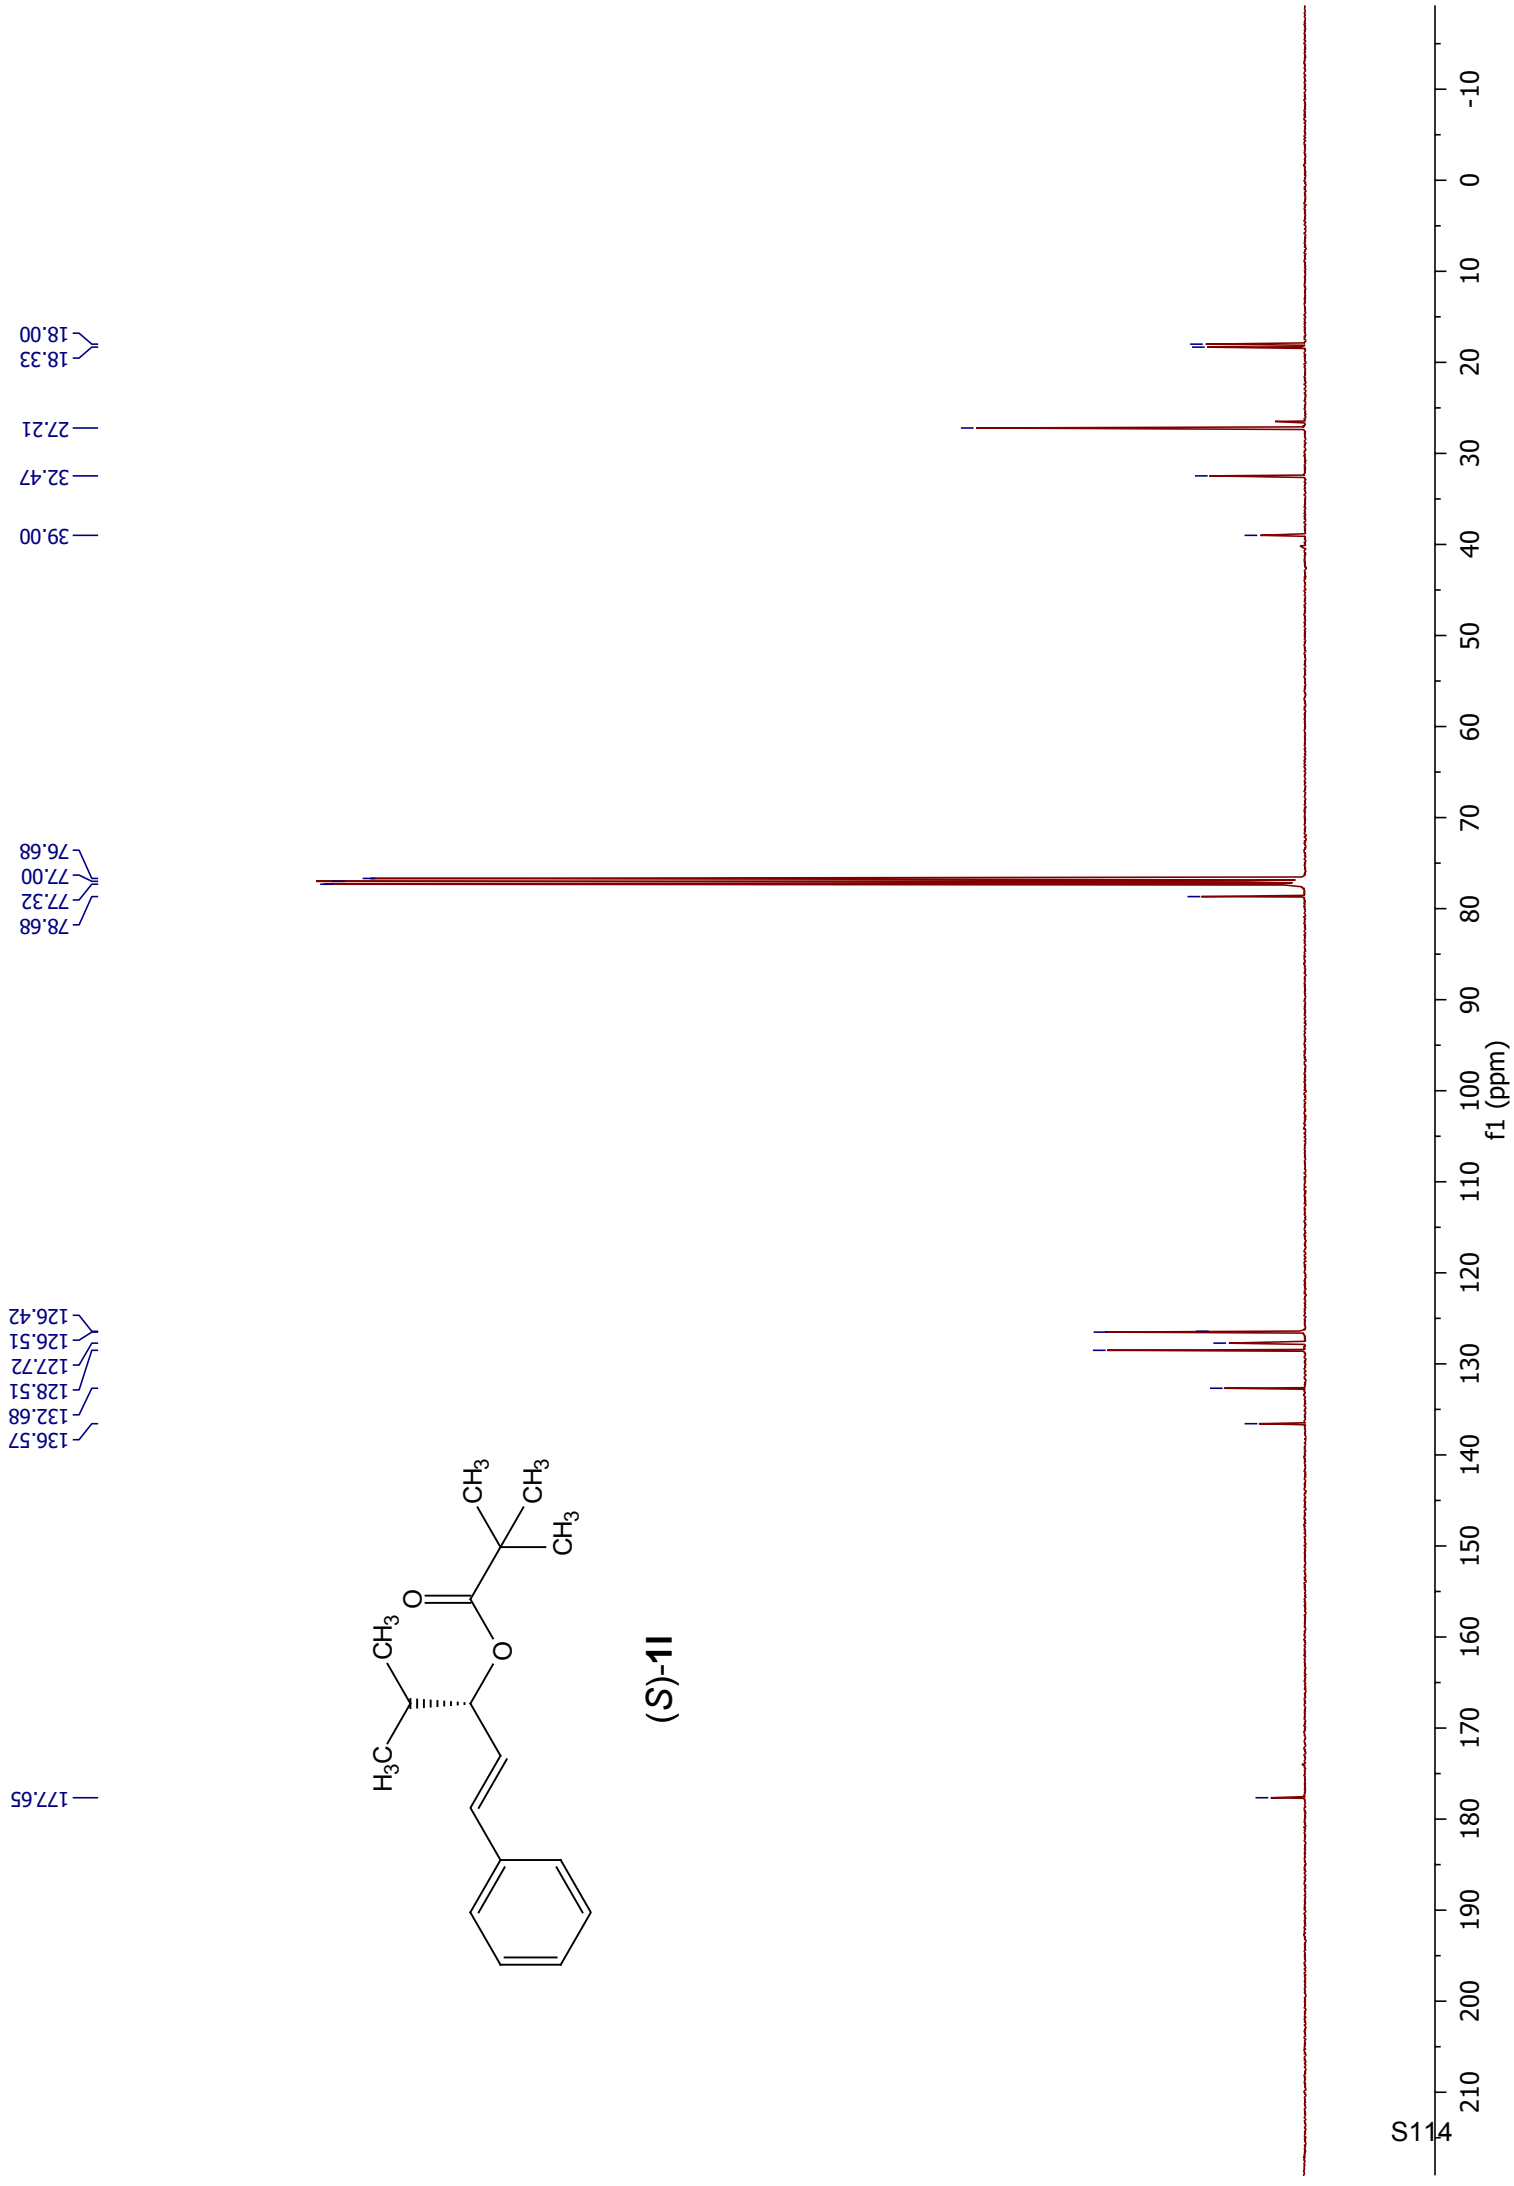

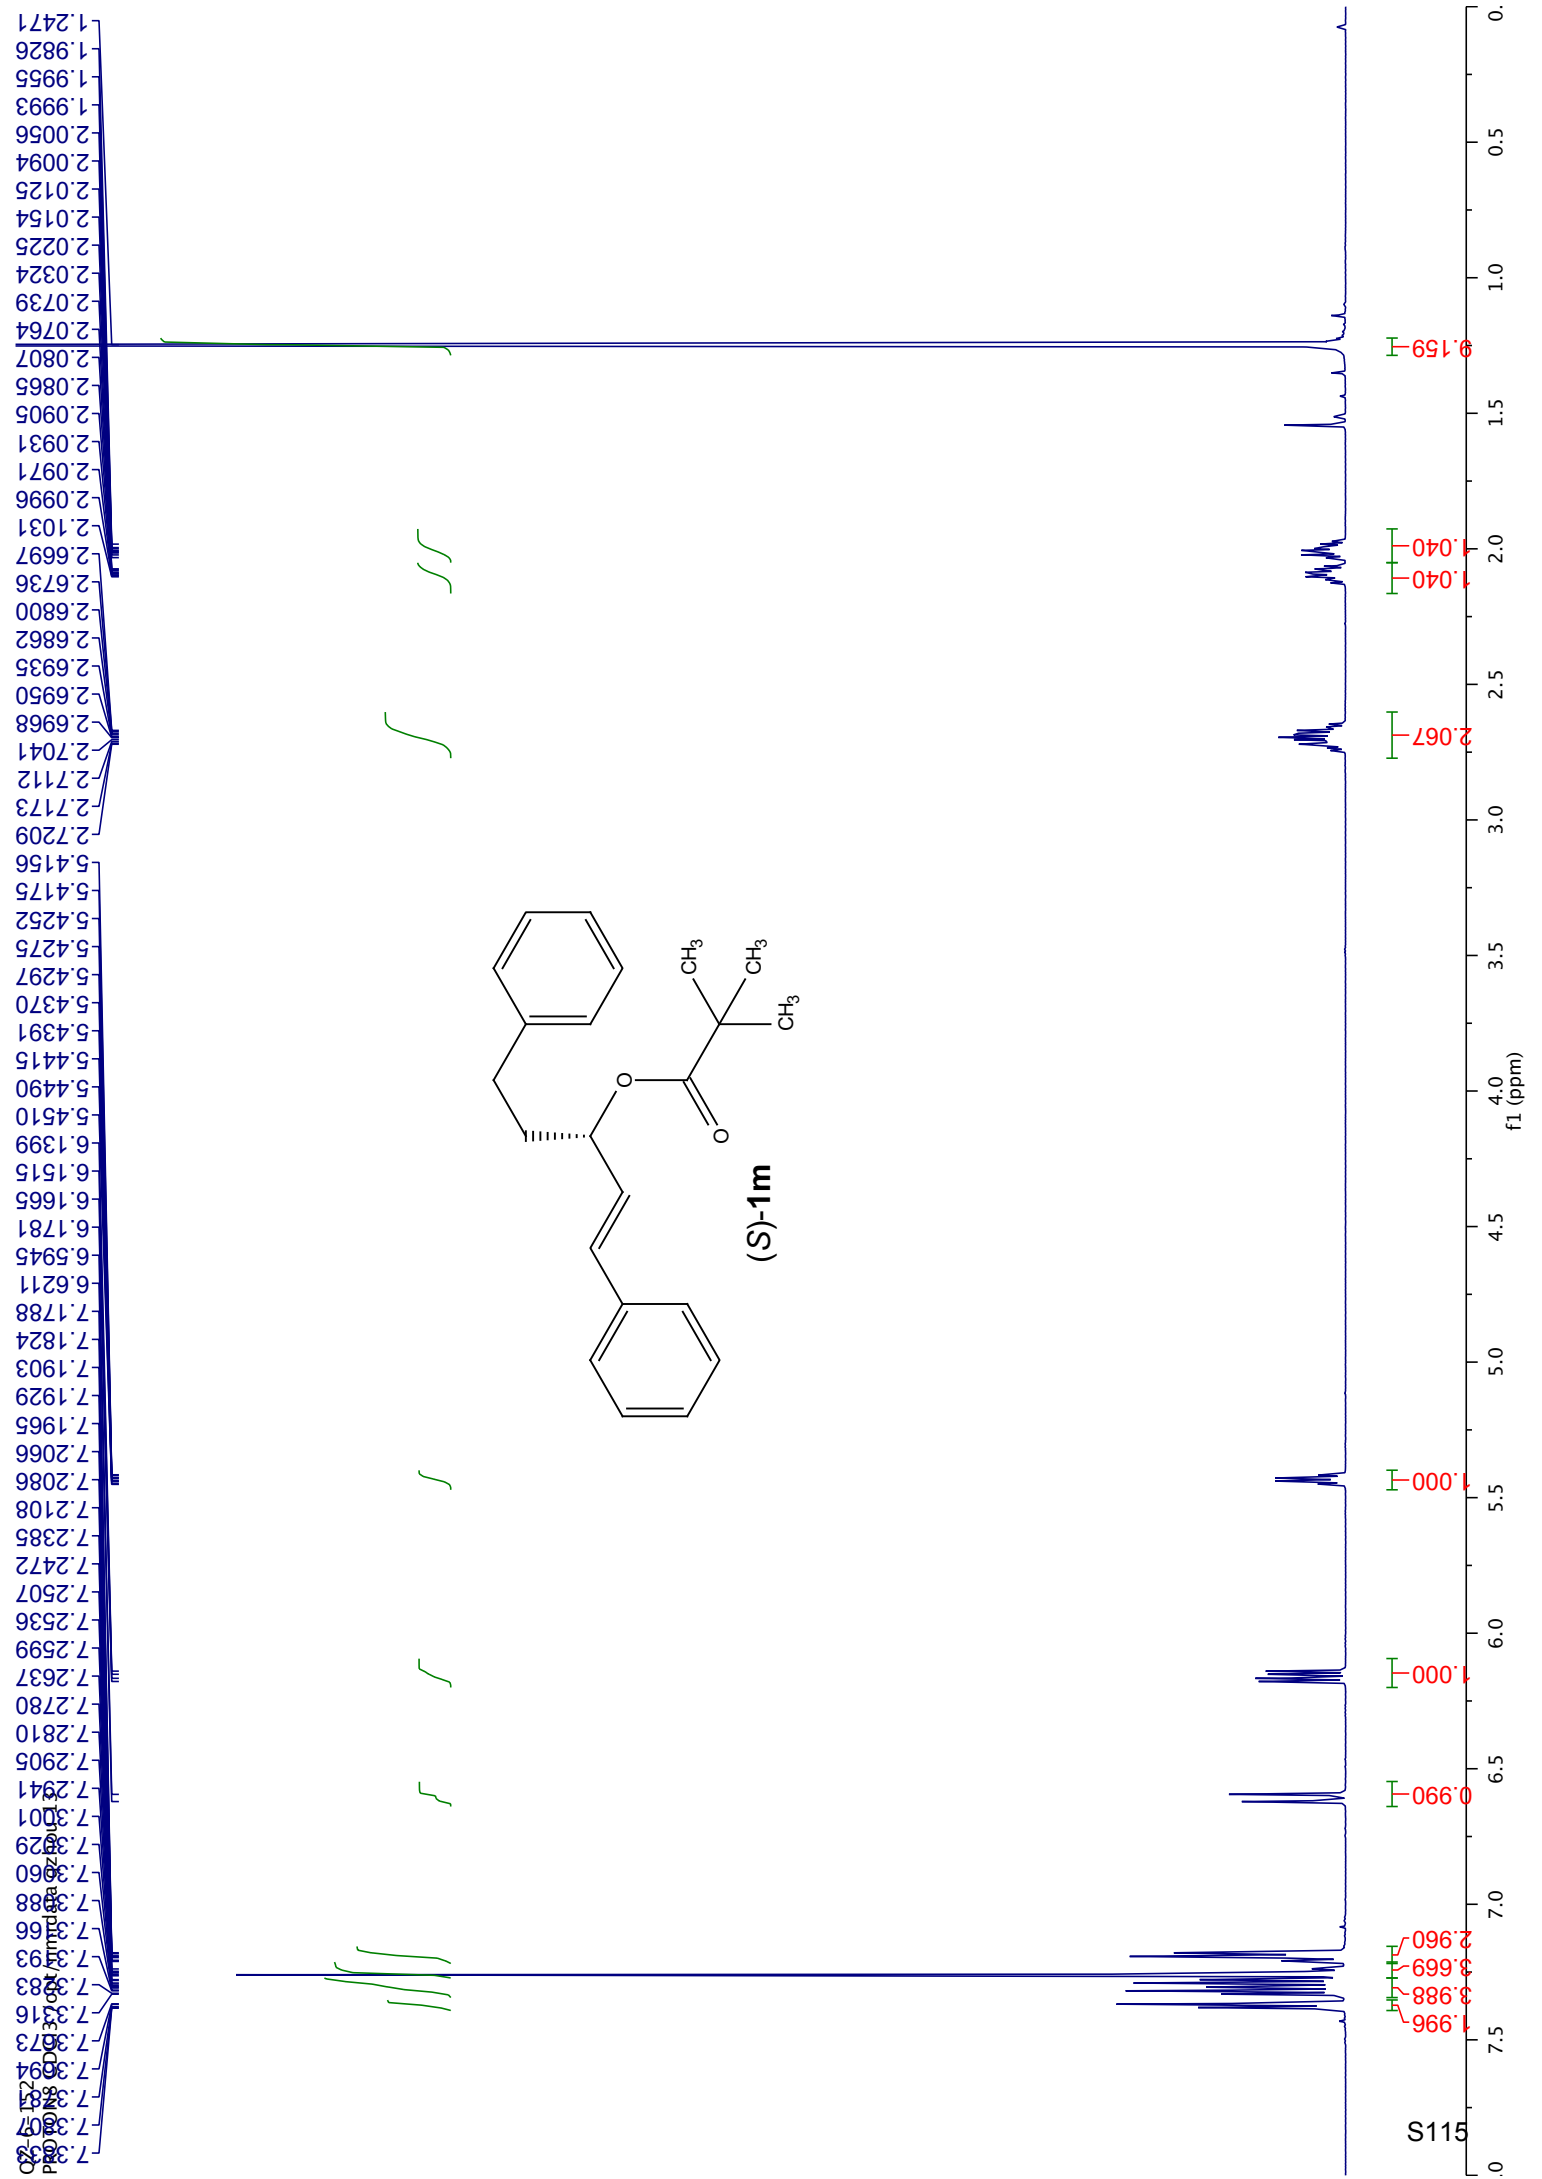

141.5320  
136.5819  
132.4358  
128.7064  
128.6171  
128.5074  
128.0248  
127.8020  
126.7230  
126.1478

73.8324

39.0815  
36.5183  
31.6806  
27.3701

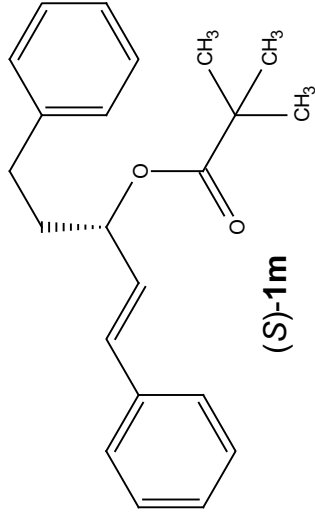

177.8574

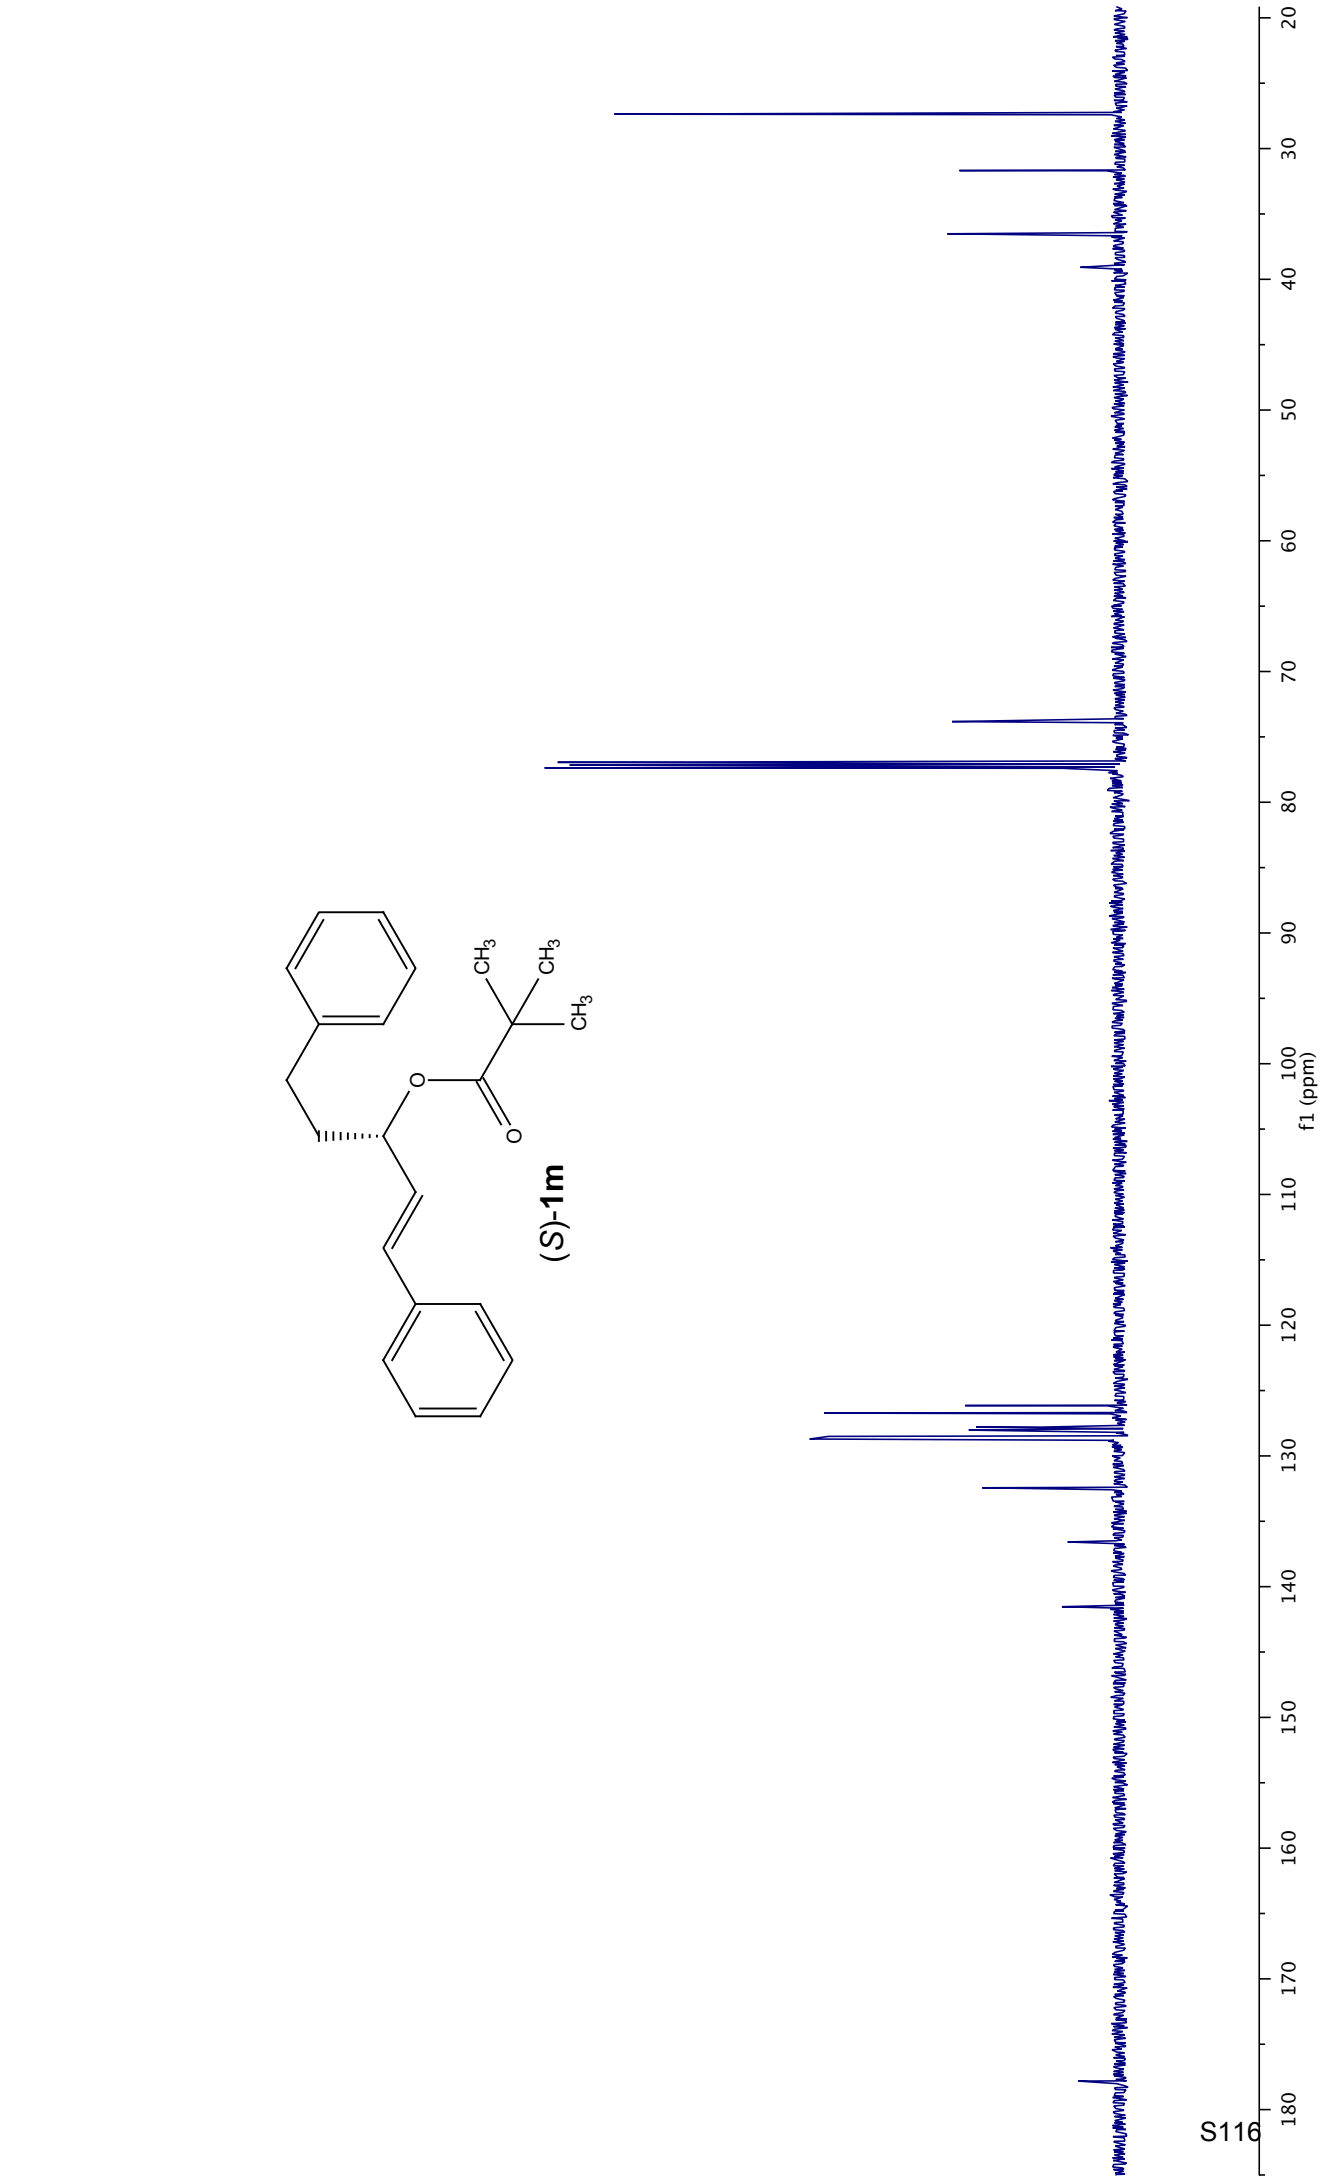

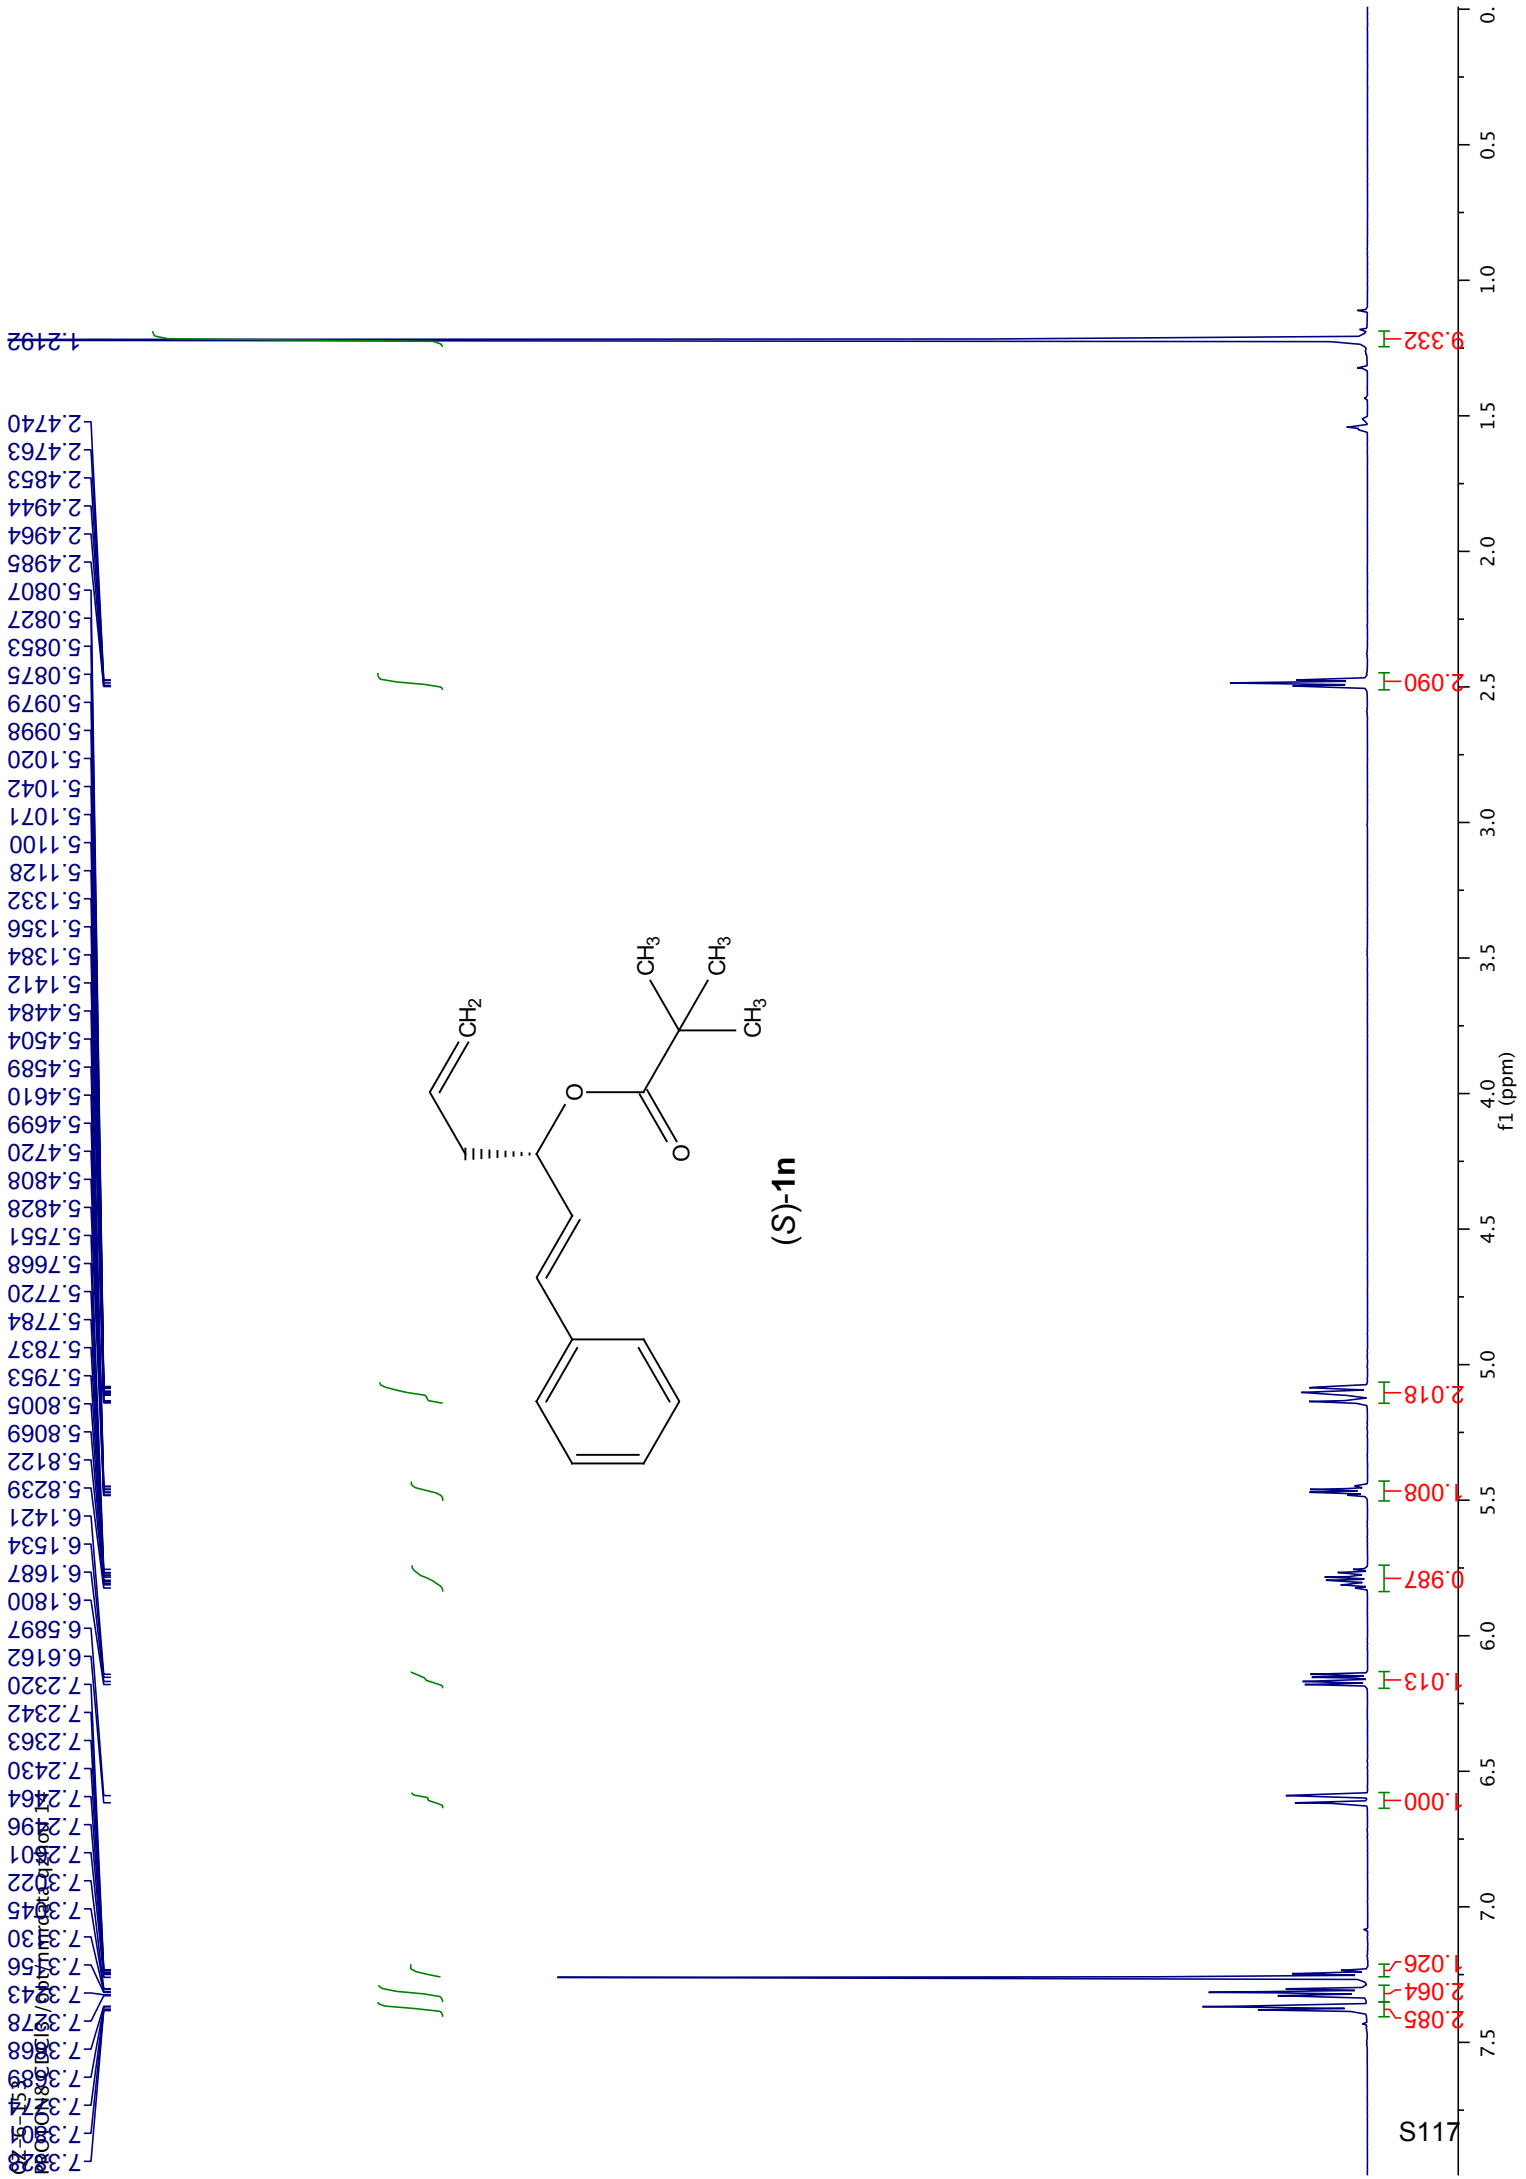

177.7067  
136.5824  
133.3678  
132.2199  
128.7008  
128.0101  
127.5487  
126.7274  
118.1658  
73.2527  
39.3736  
39.0437  
27.3454

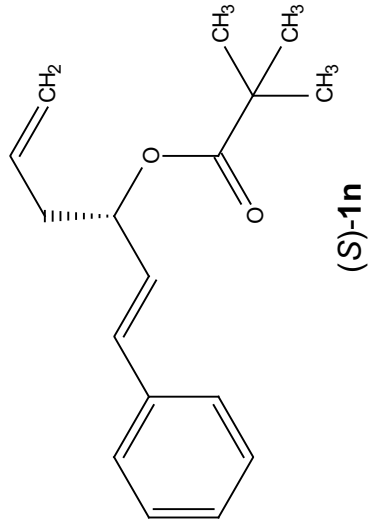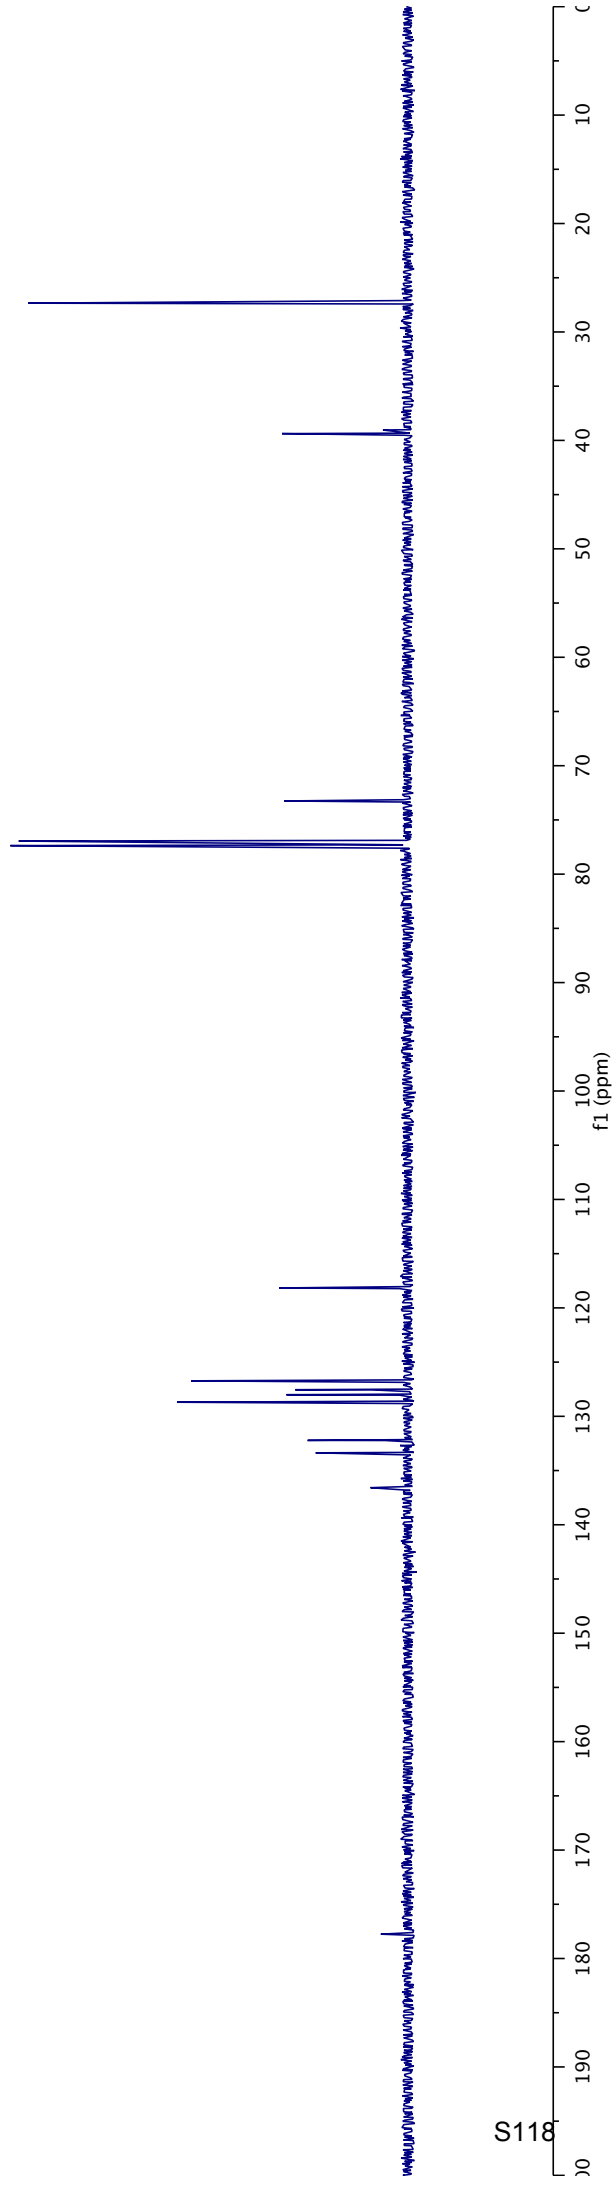

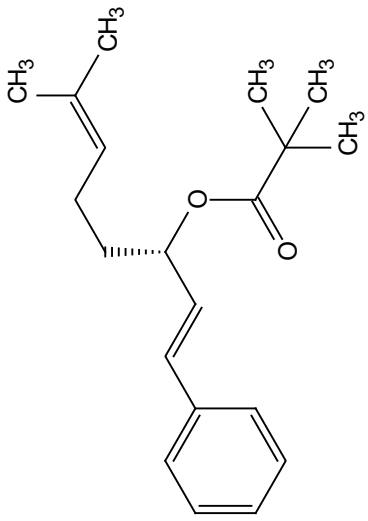

(S)-10

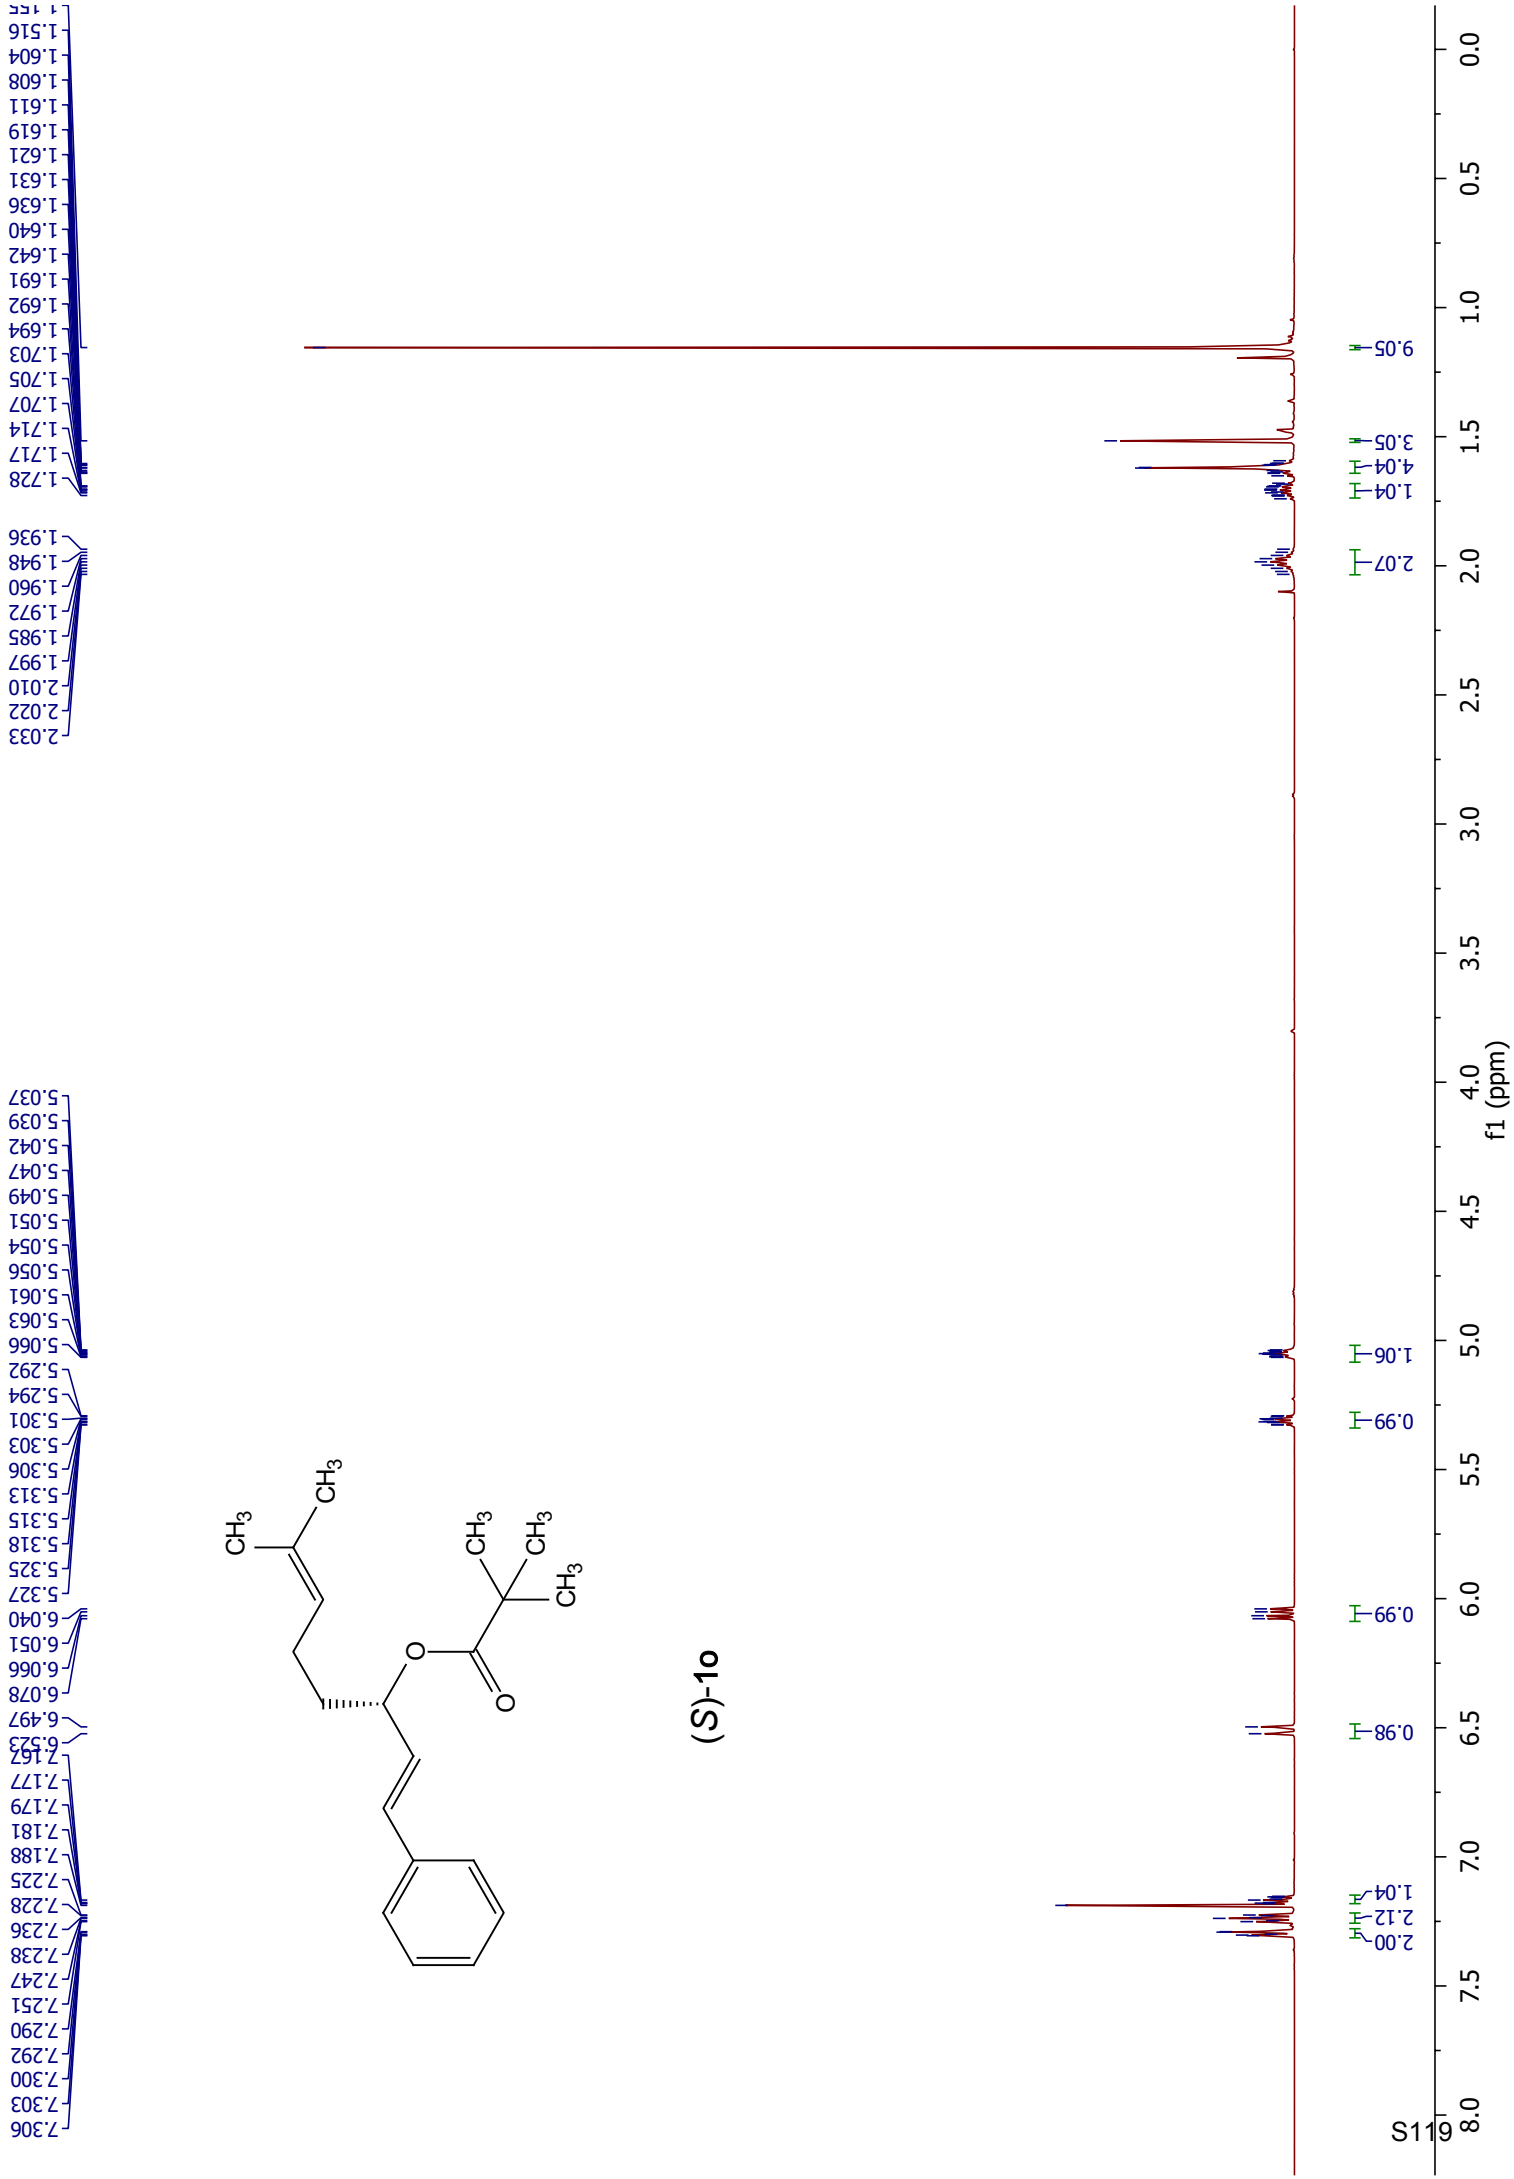

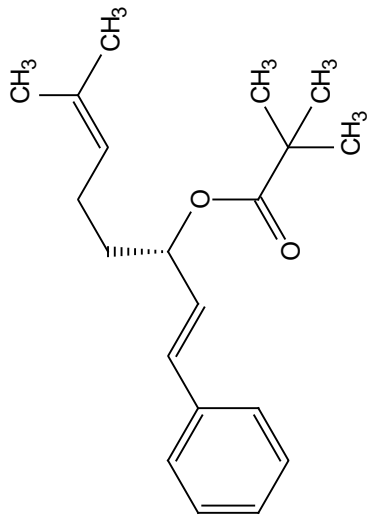

(S)-10

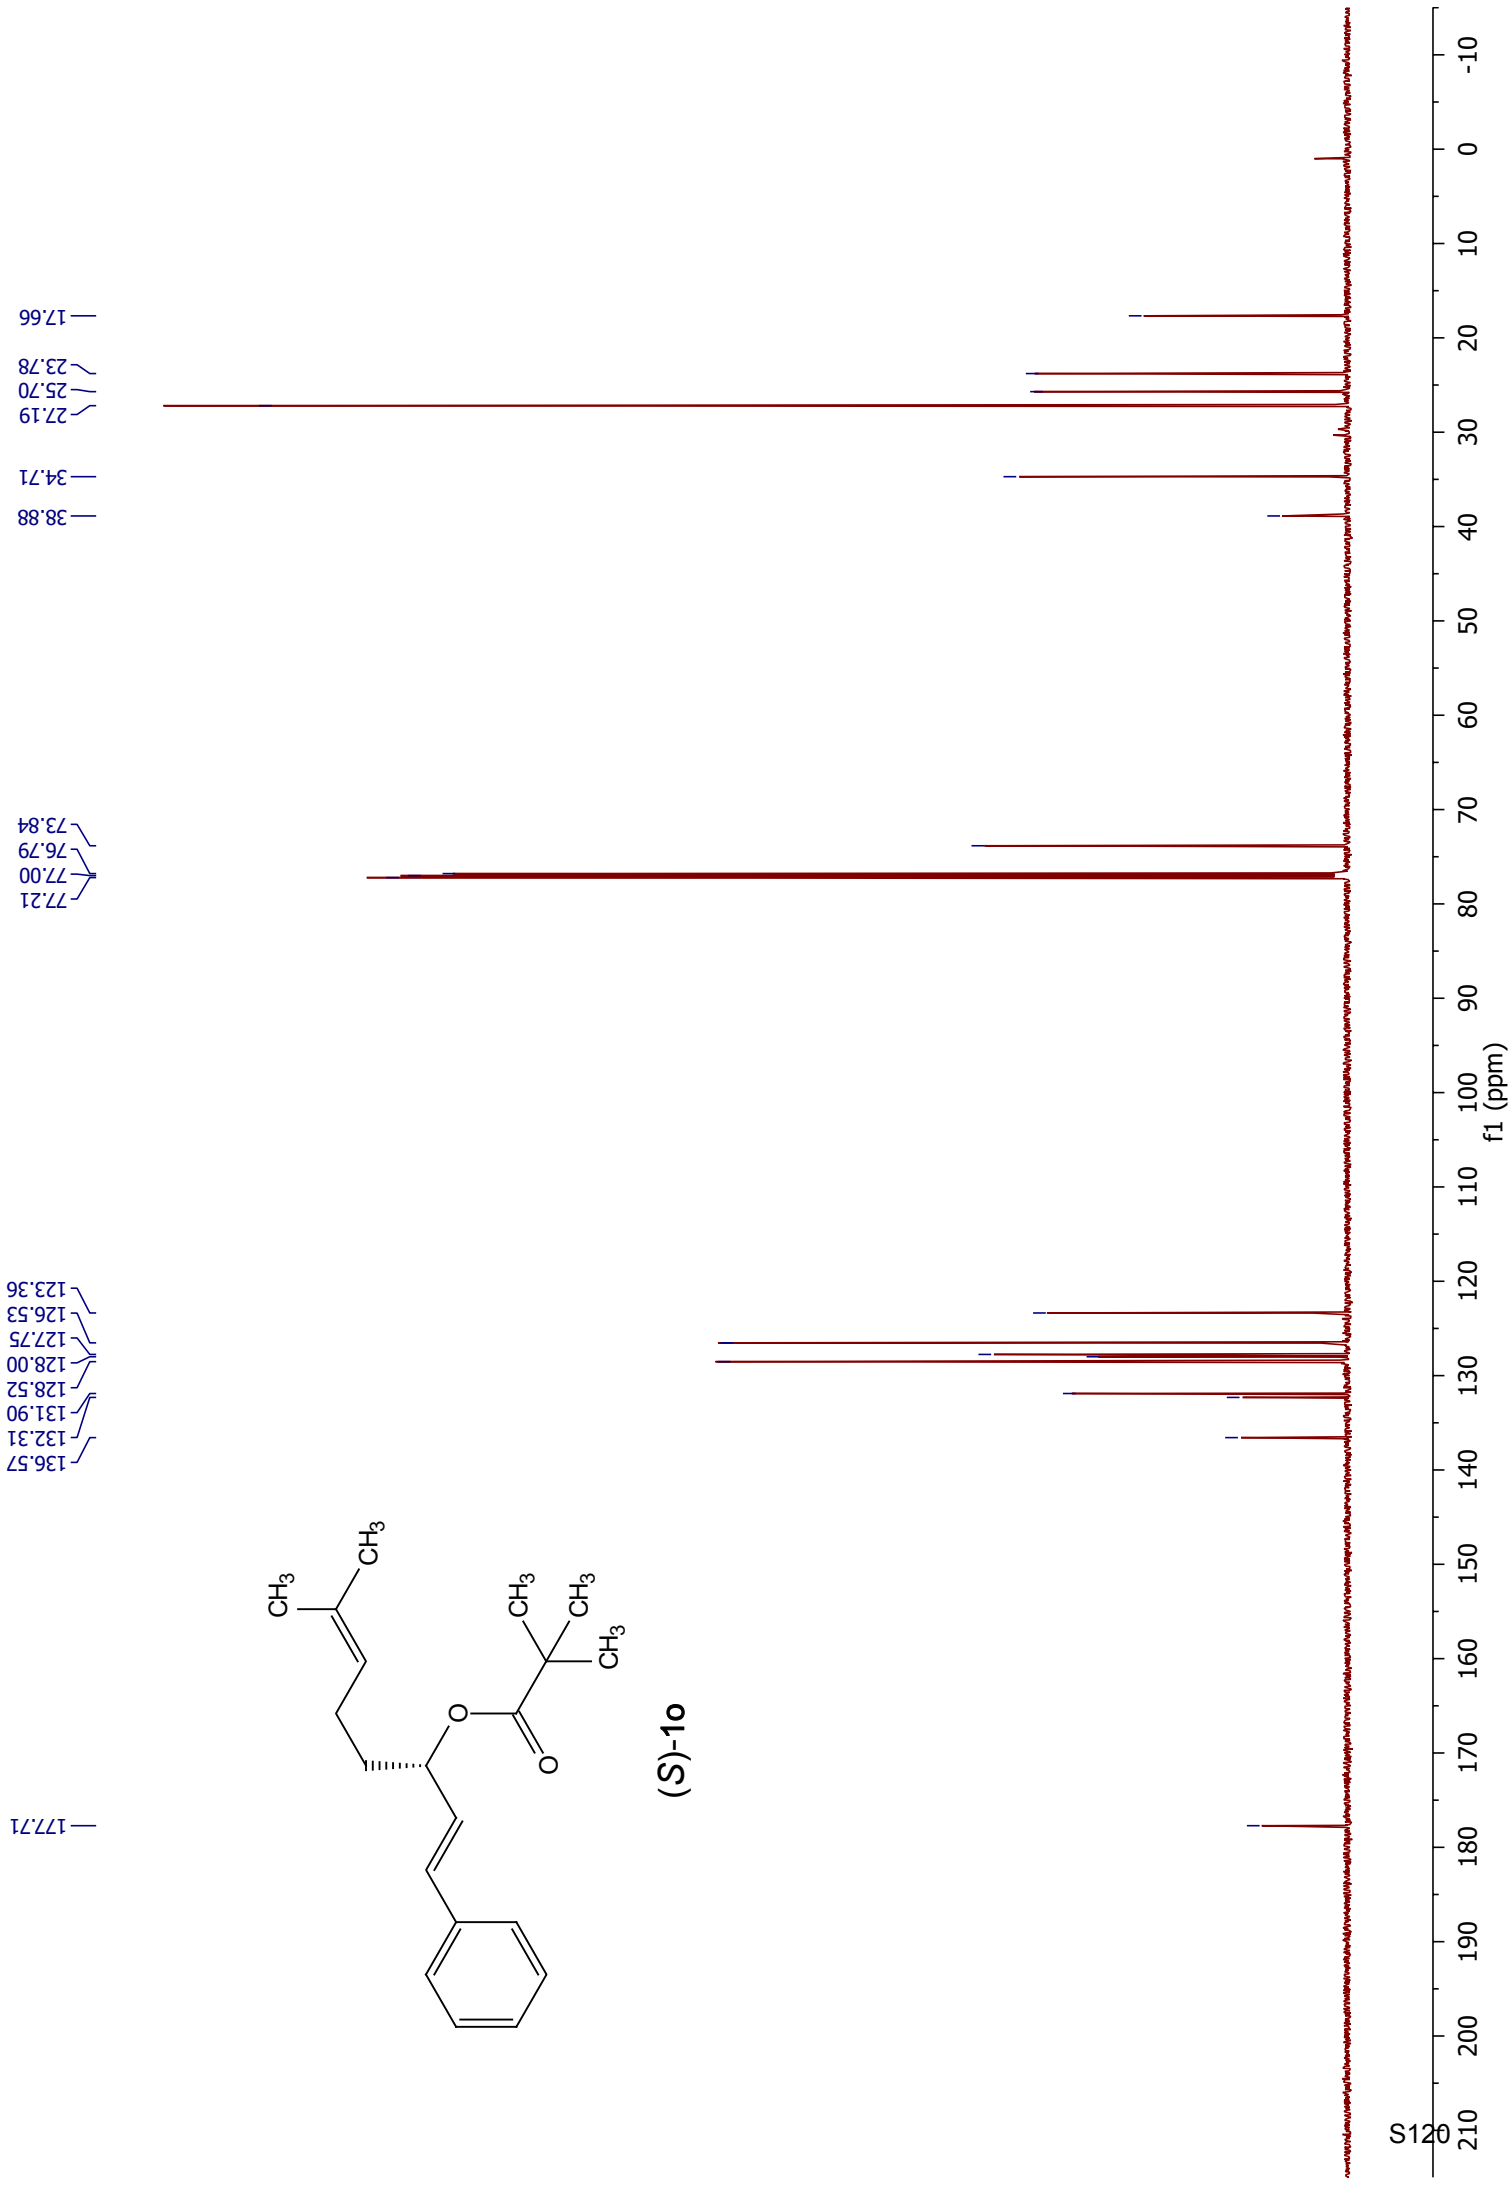



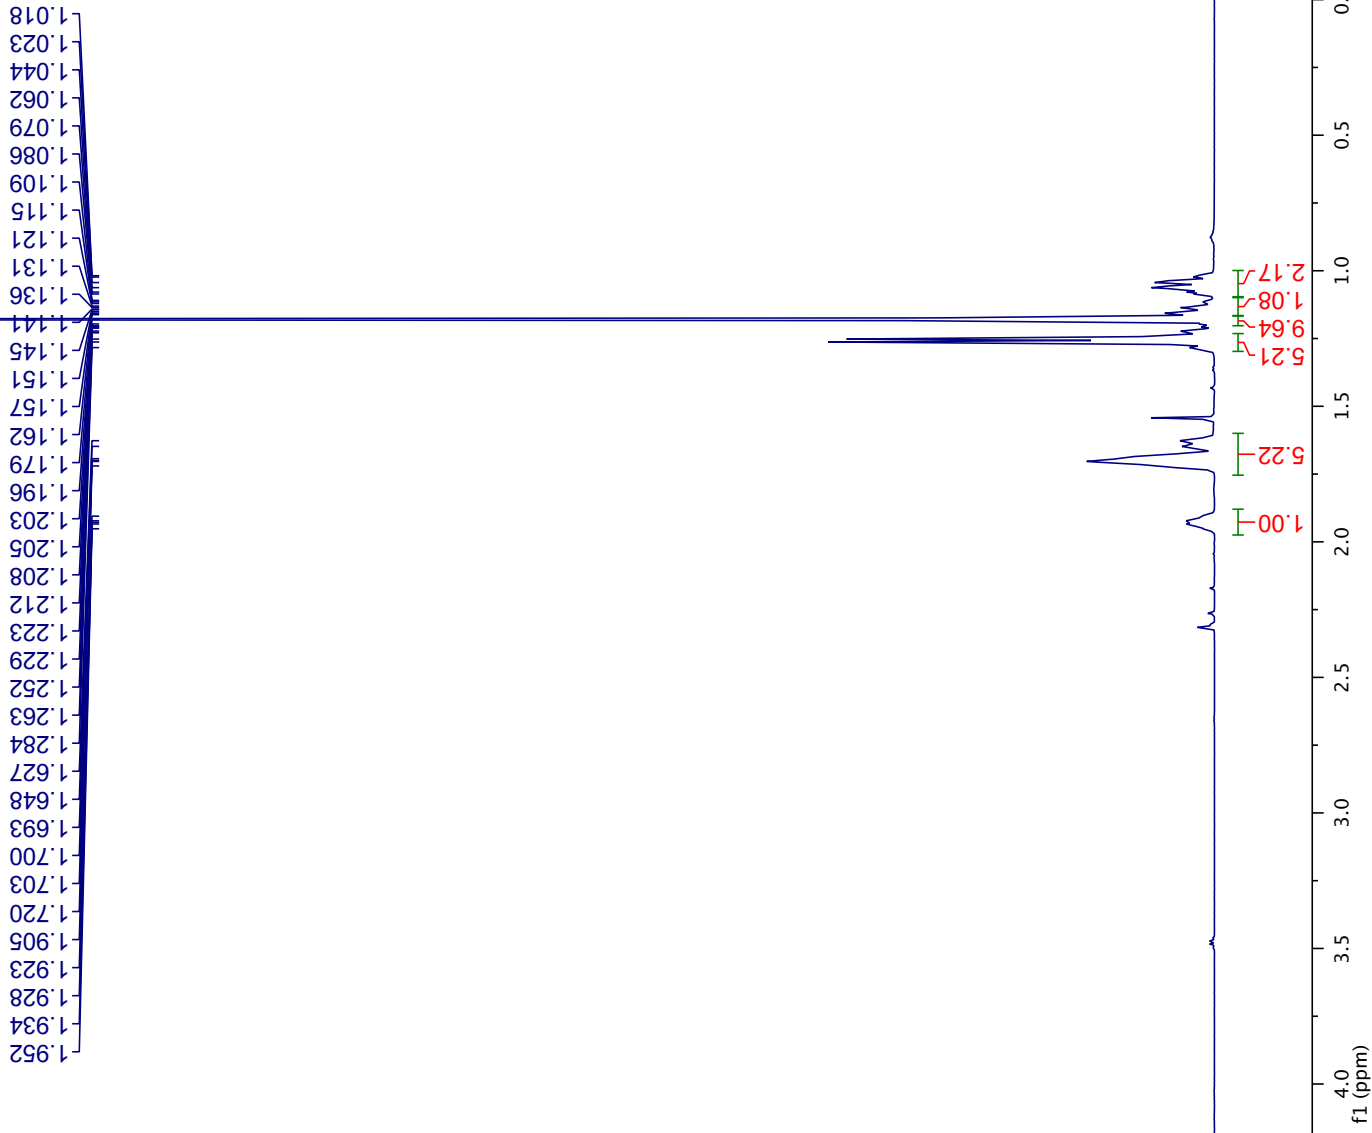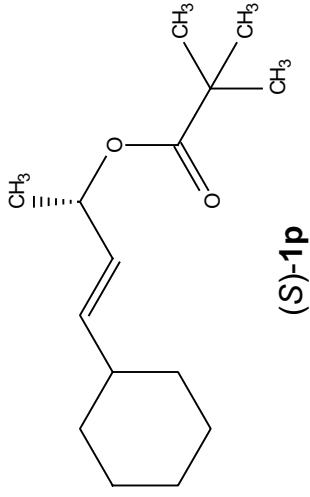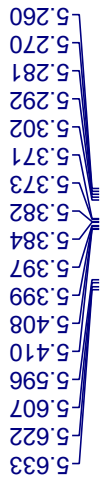

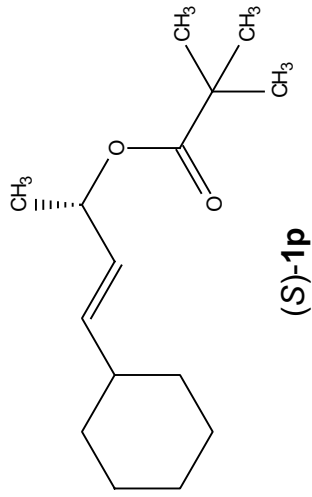

— 20.5329  
 — 26.1195  
 — 26.3009  
 — 27.2712  
 — 32.8229  
 — 32.8952  
 — 40.3417

— 70.8384

— 77.1600 Chloroform-d

— 127.3409

— 138.5203

— 177.8957

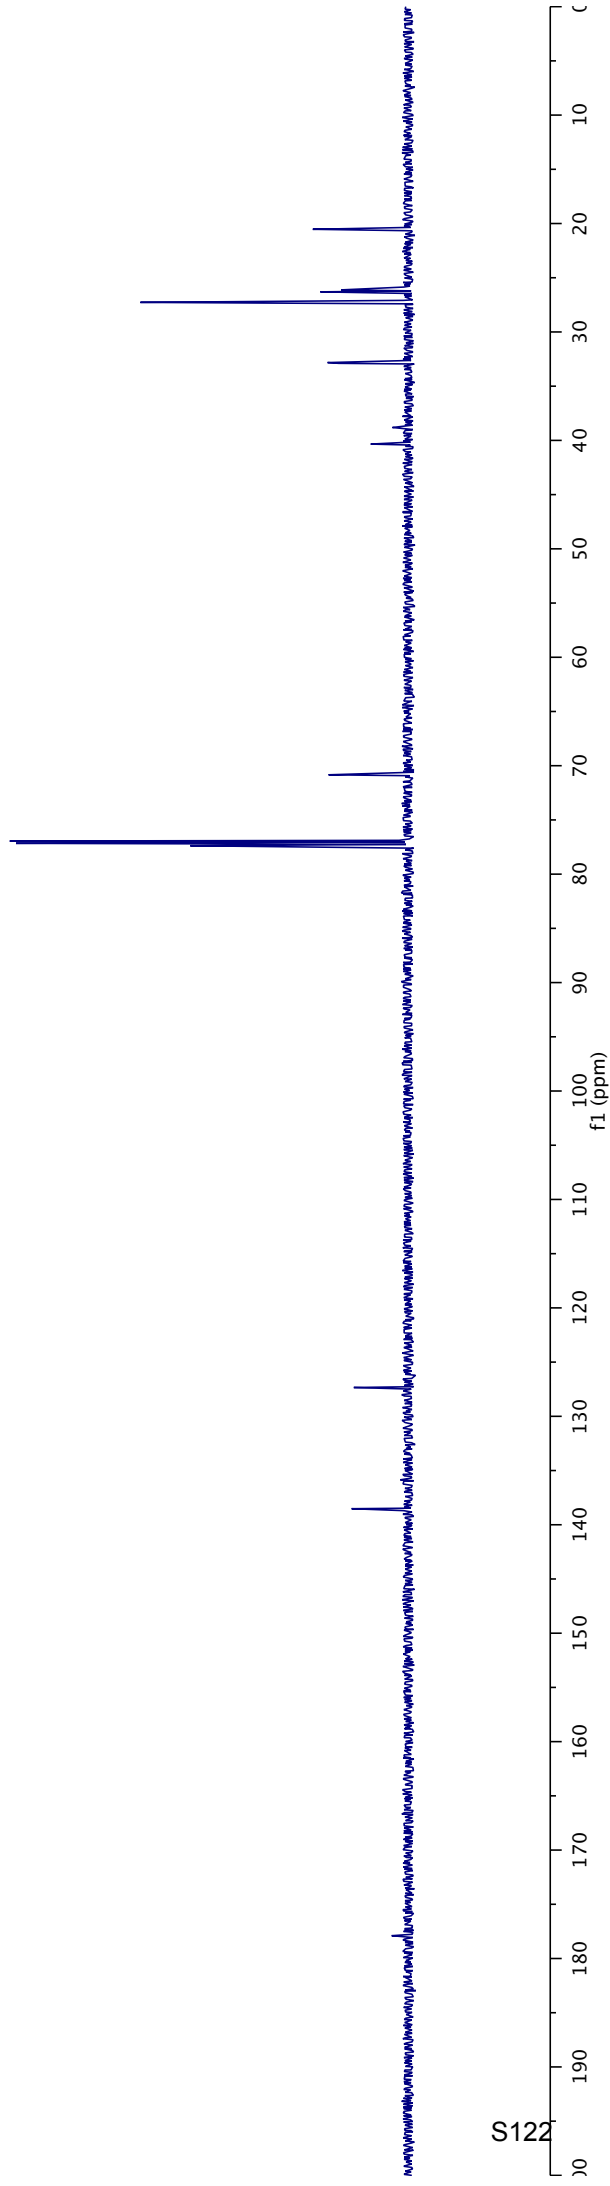

1.407  
1.396  
1.225

5.486  
5.488  
5.497  
5.499  
5.508  
5.510  
5.518  
5.521  
5.529  
5.531

6.291  
6.301  
6.318  
6.328  
6.572  
6.599

7.263  
7.445  
7.448  
7.455  
7.459  
7.592  
7.595  
7.603  
7.606

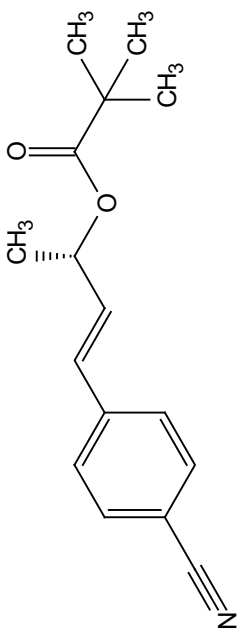

(S)-1q

2.98  
9.01

1.00

1.00

1.00

2.02

1.97

128

f1 (ppm)

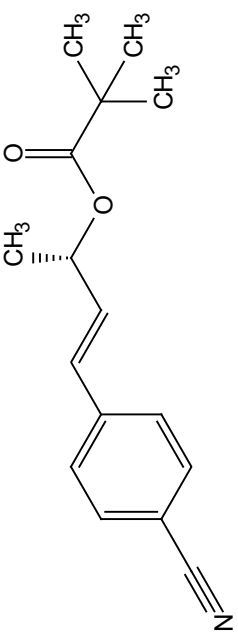

(S)-1q

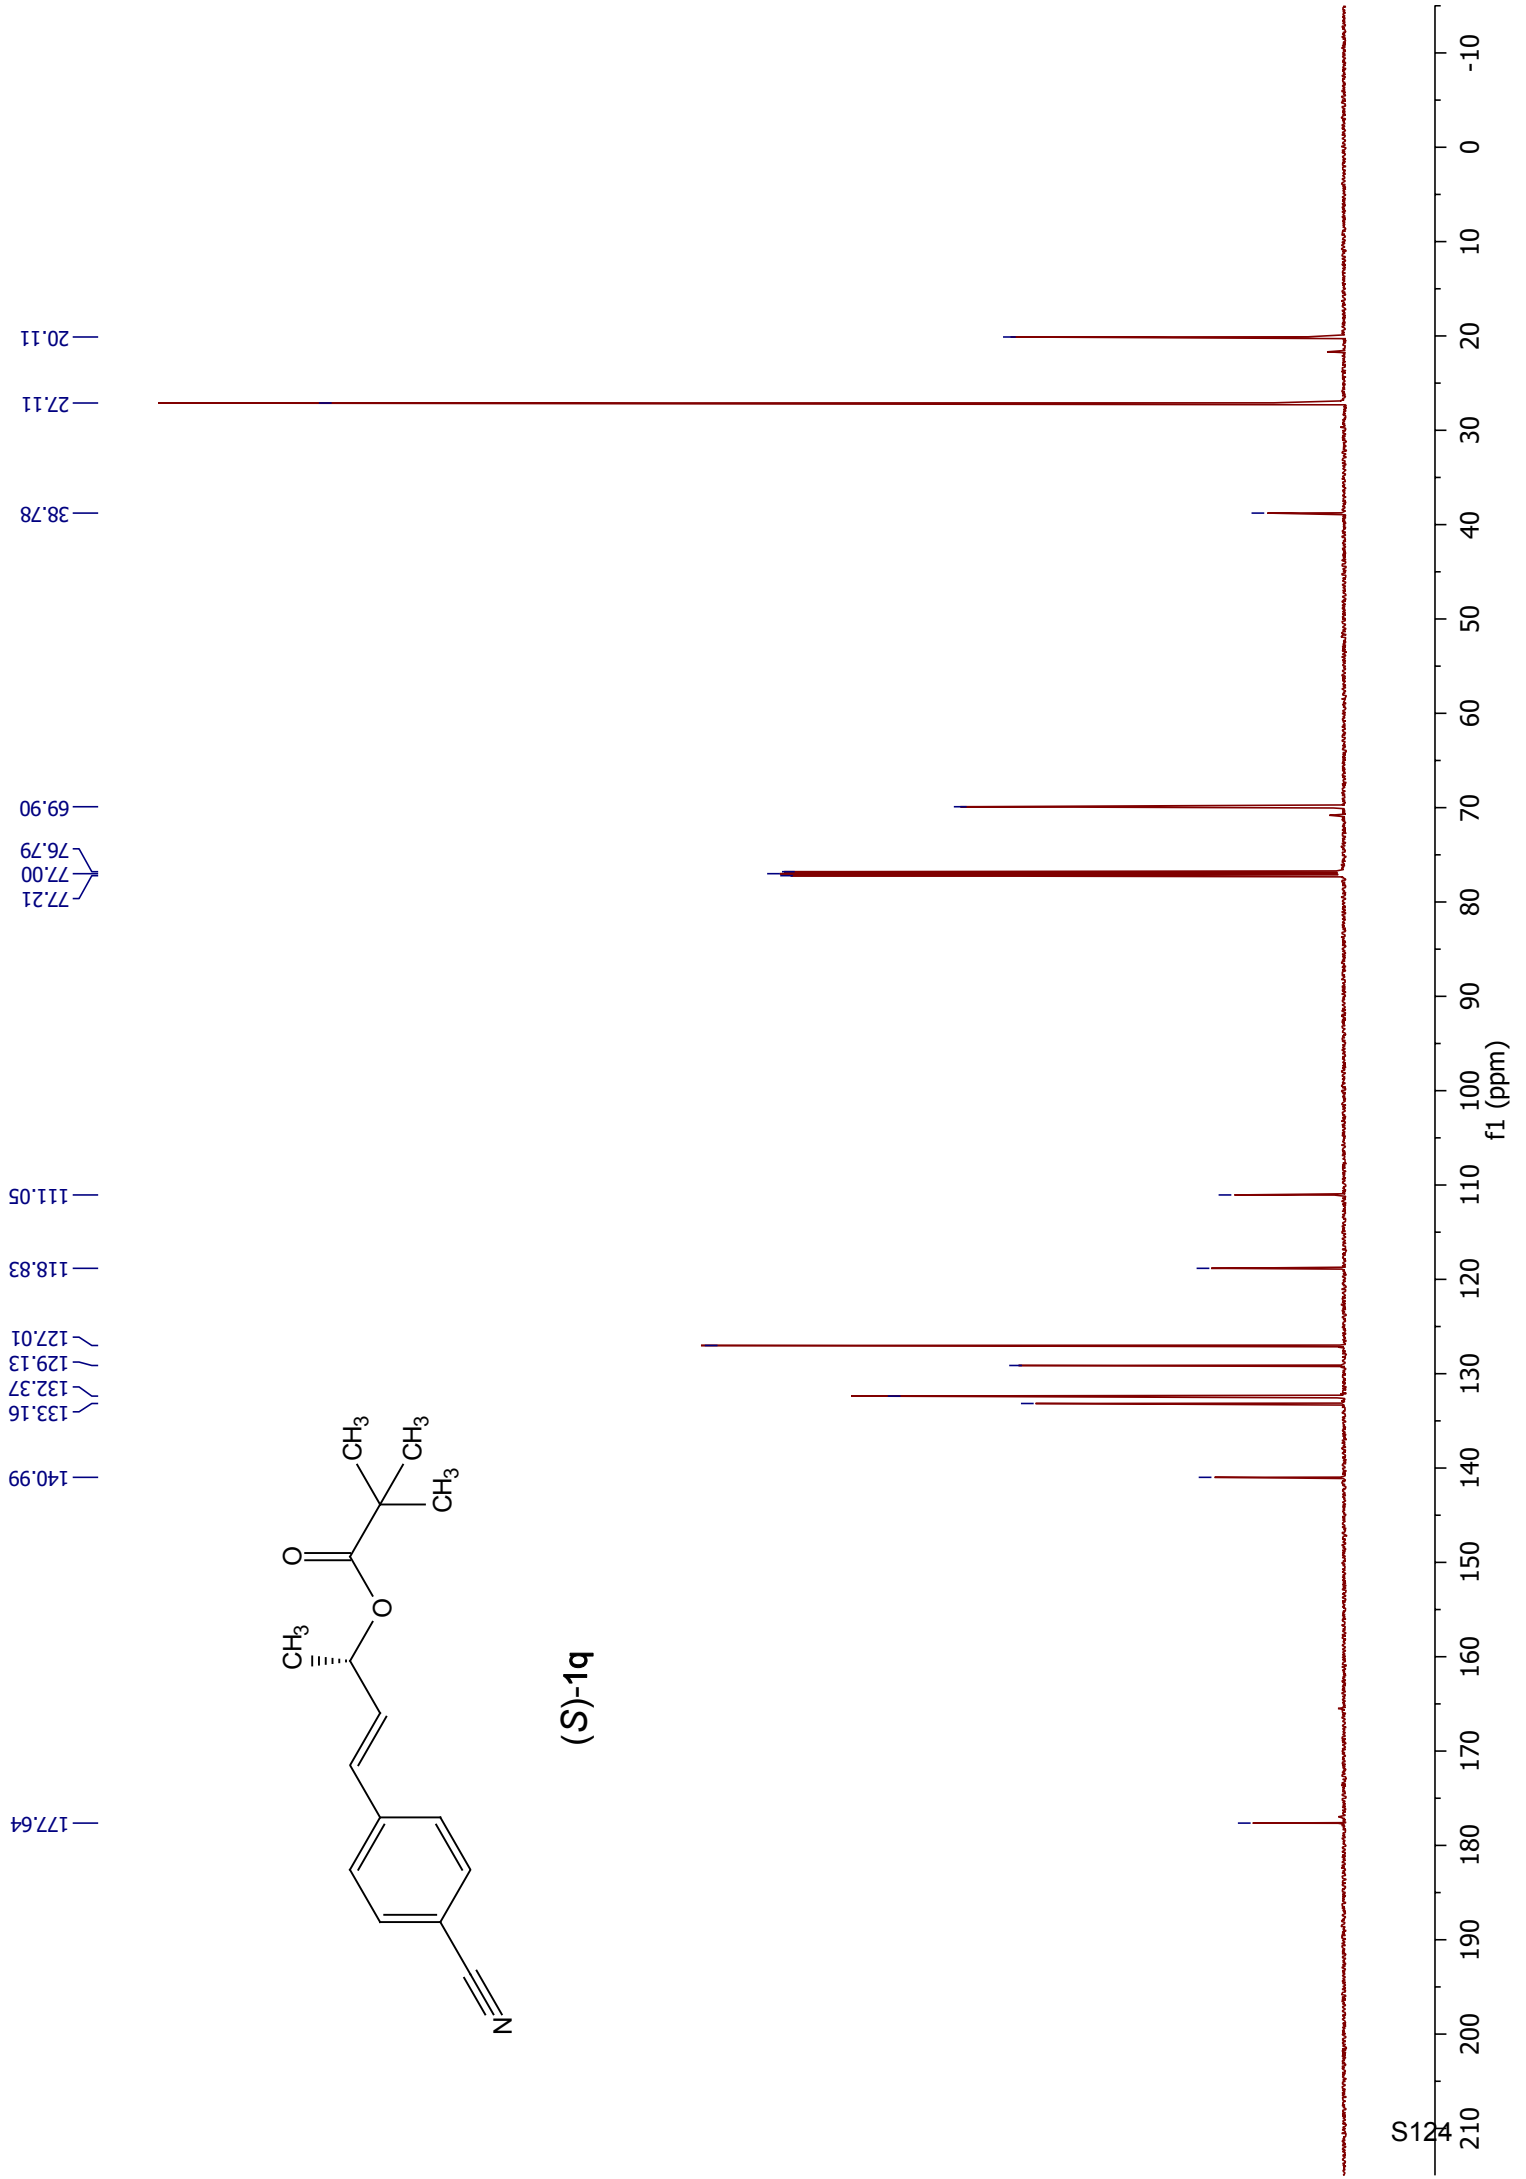

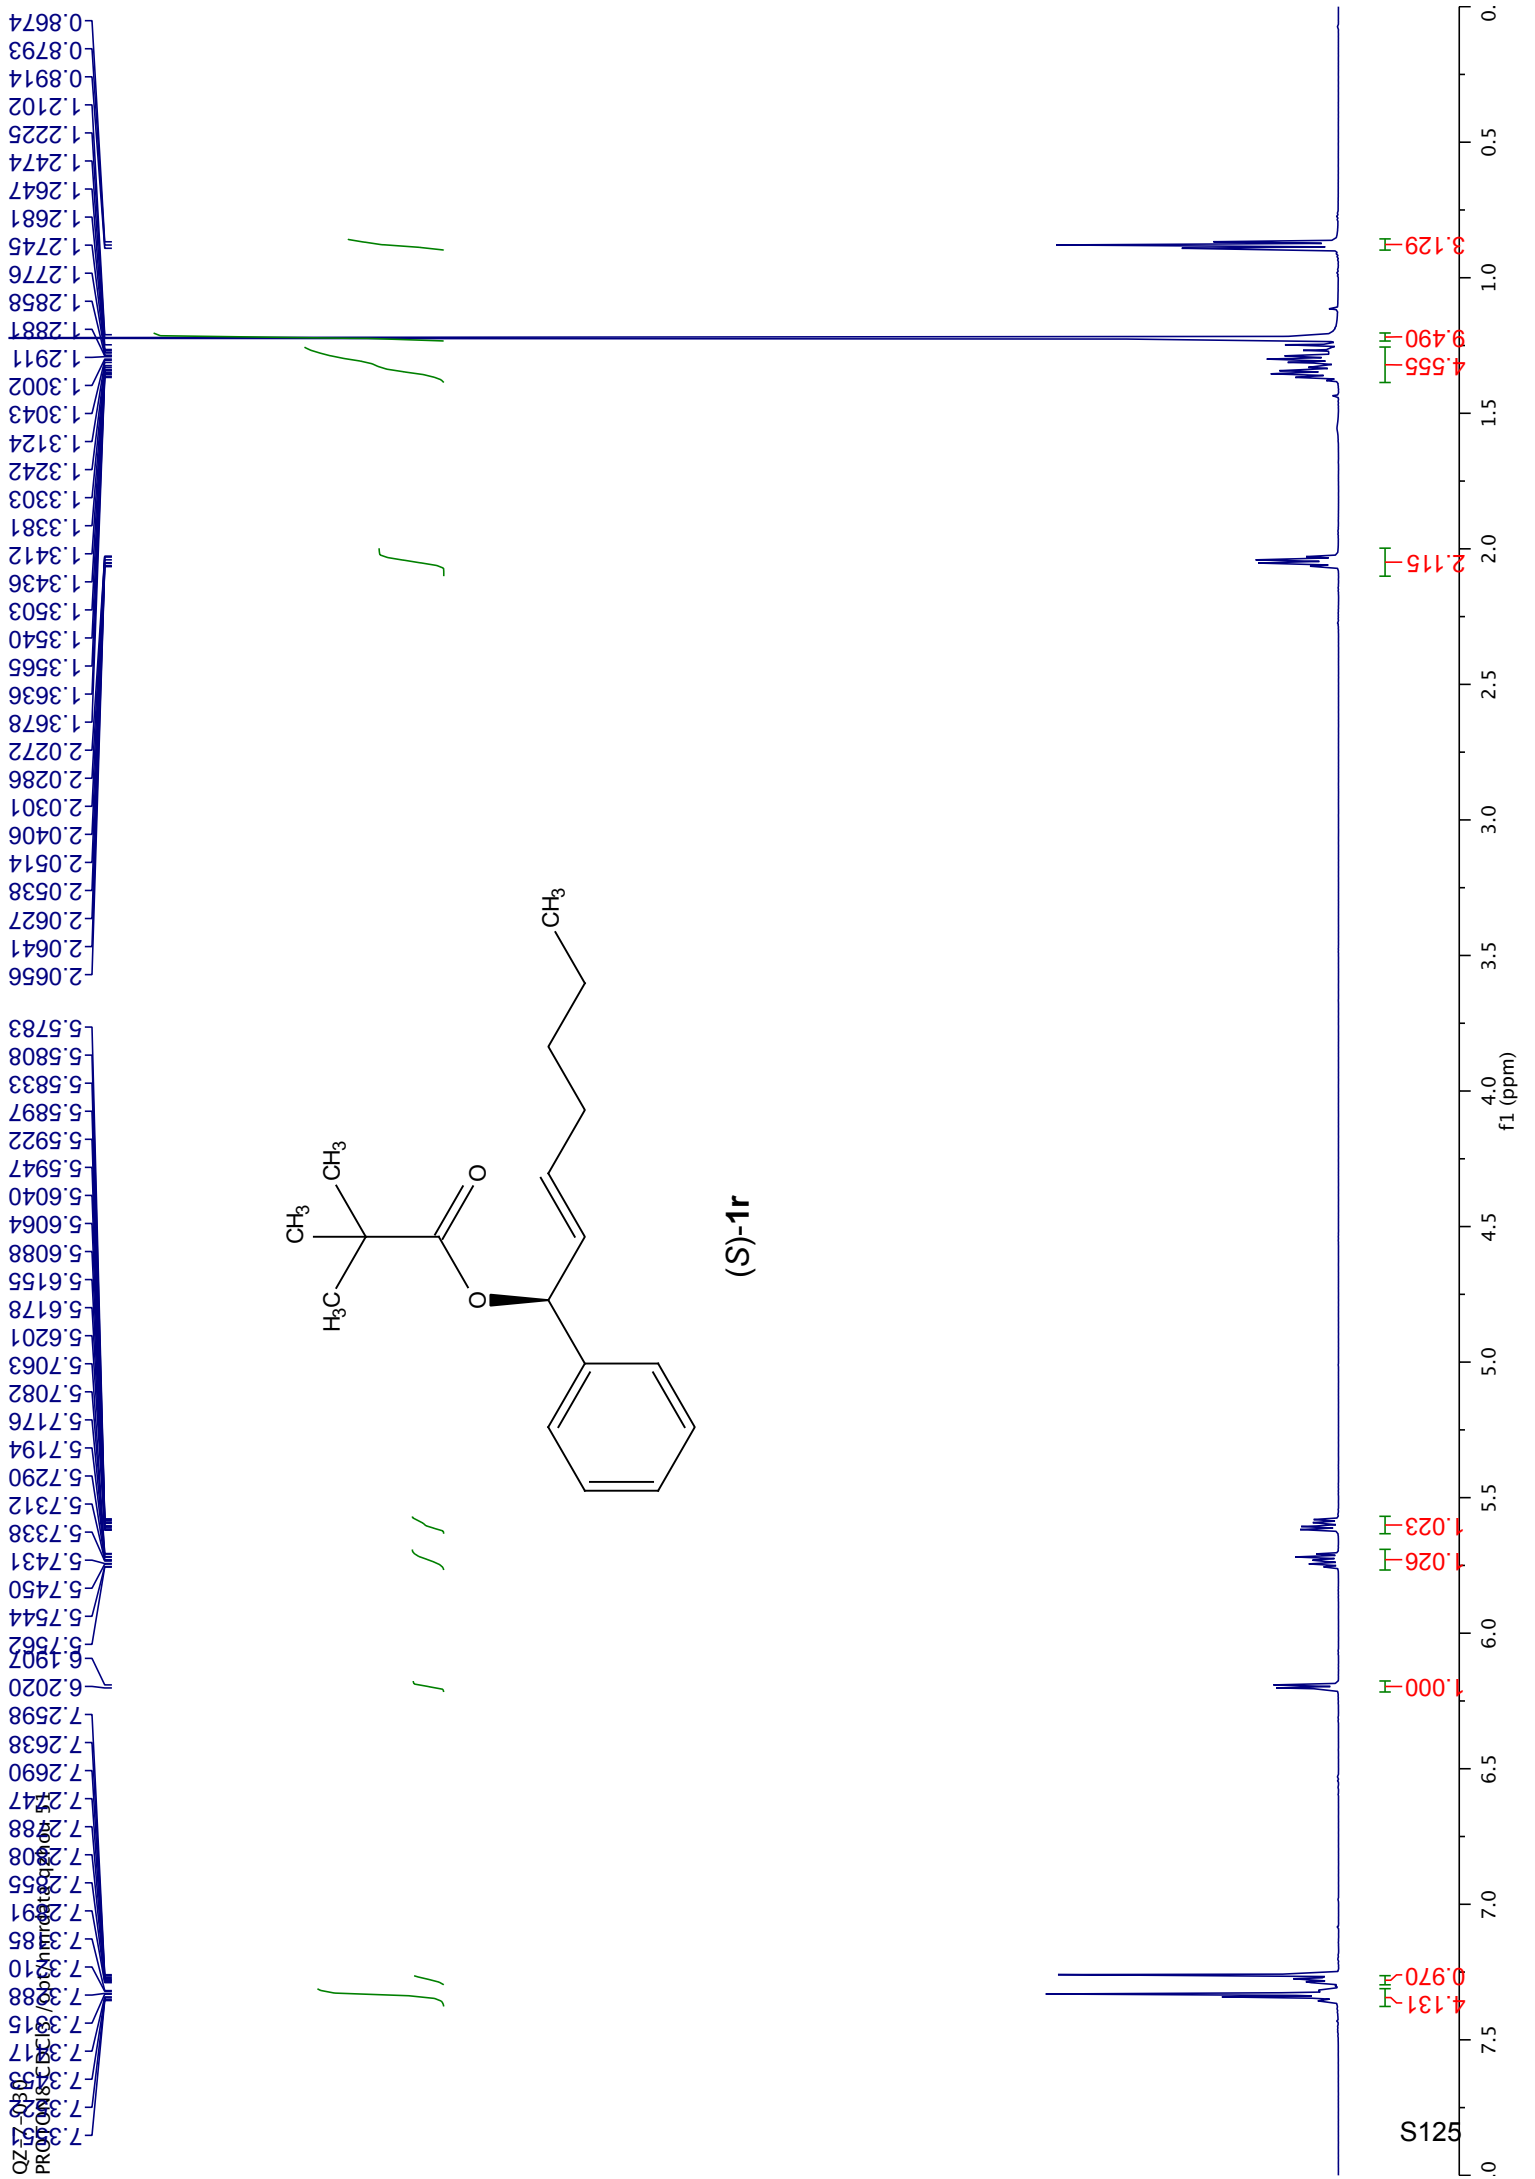

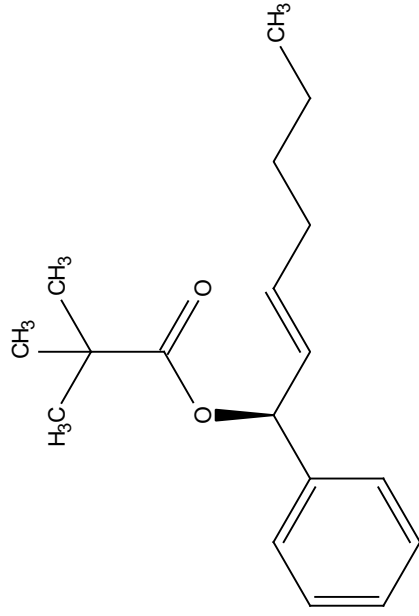

(S)-1r

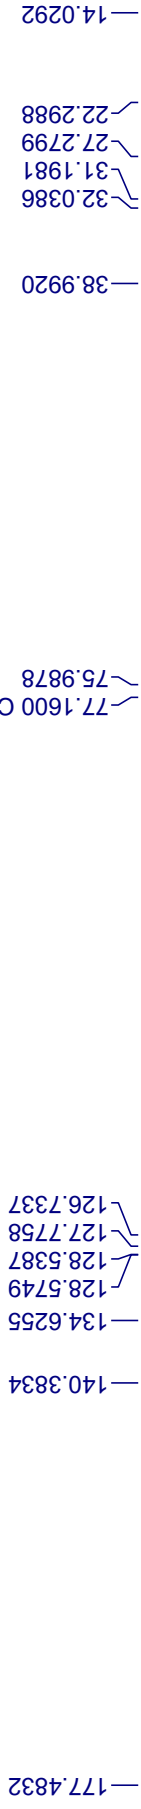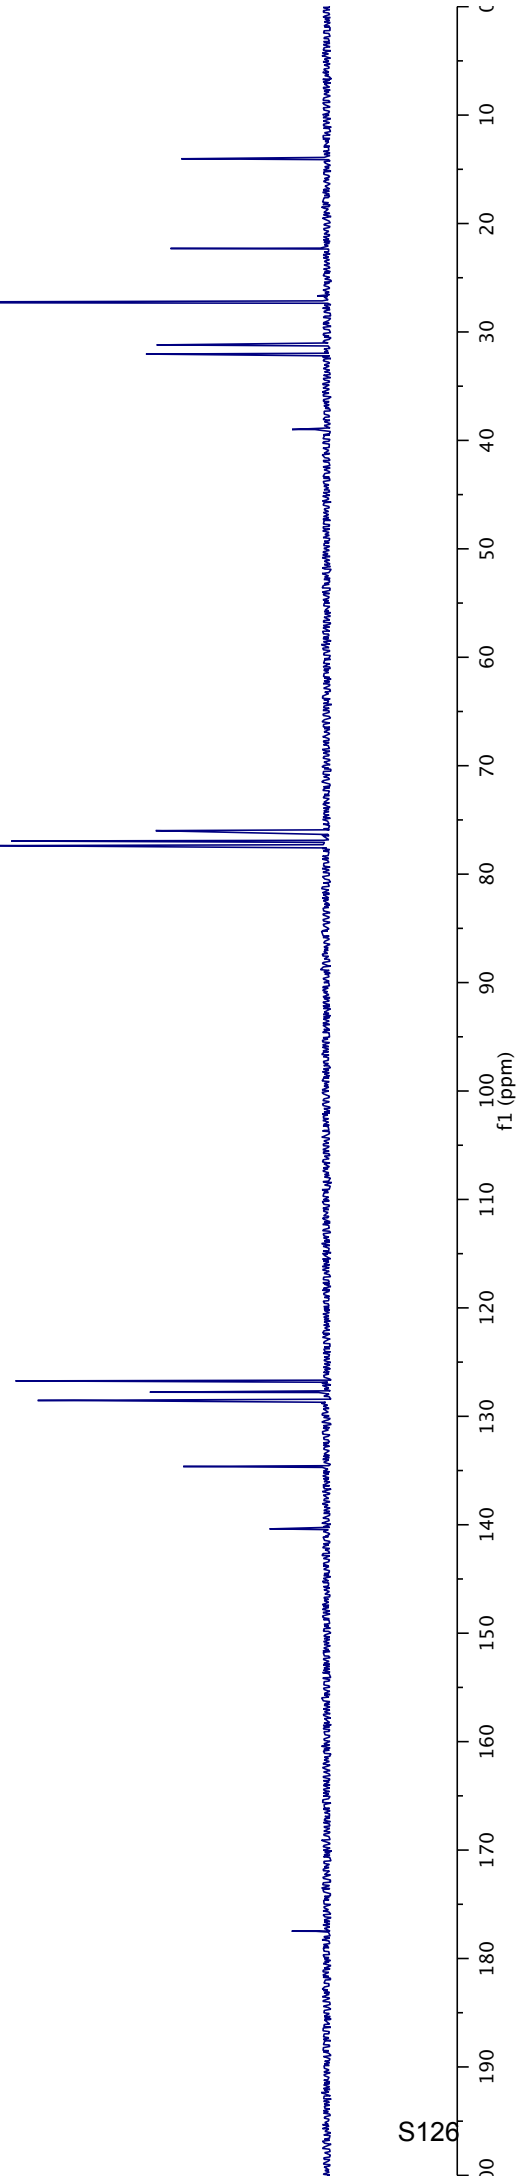

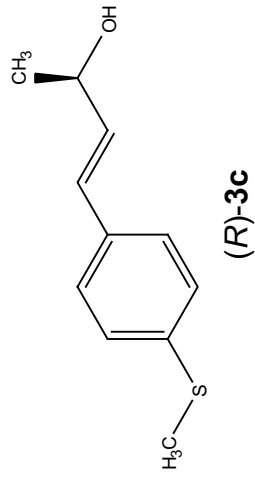

1.3643  
1.3748  
1.5897

2.4829

4.4591  
4.4612  
4.4696  
4.4717  
4.4804  
4.4827  
4.4906  
4.4928  
4.5015  
4.5036

6.2025  
6.2132  
6.2290  
6.2397  
6.5038  
6.5302

7.1932  
7.2071  
7.2600  
7.2915  
7.3054

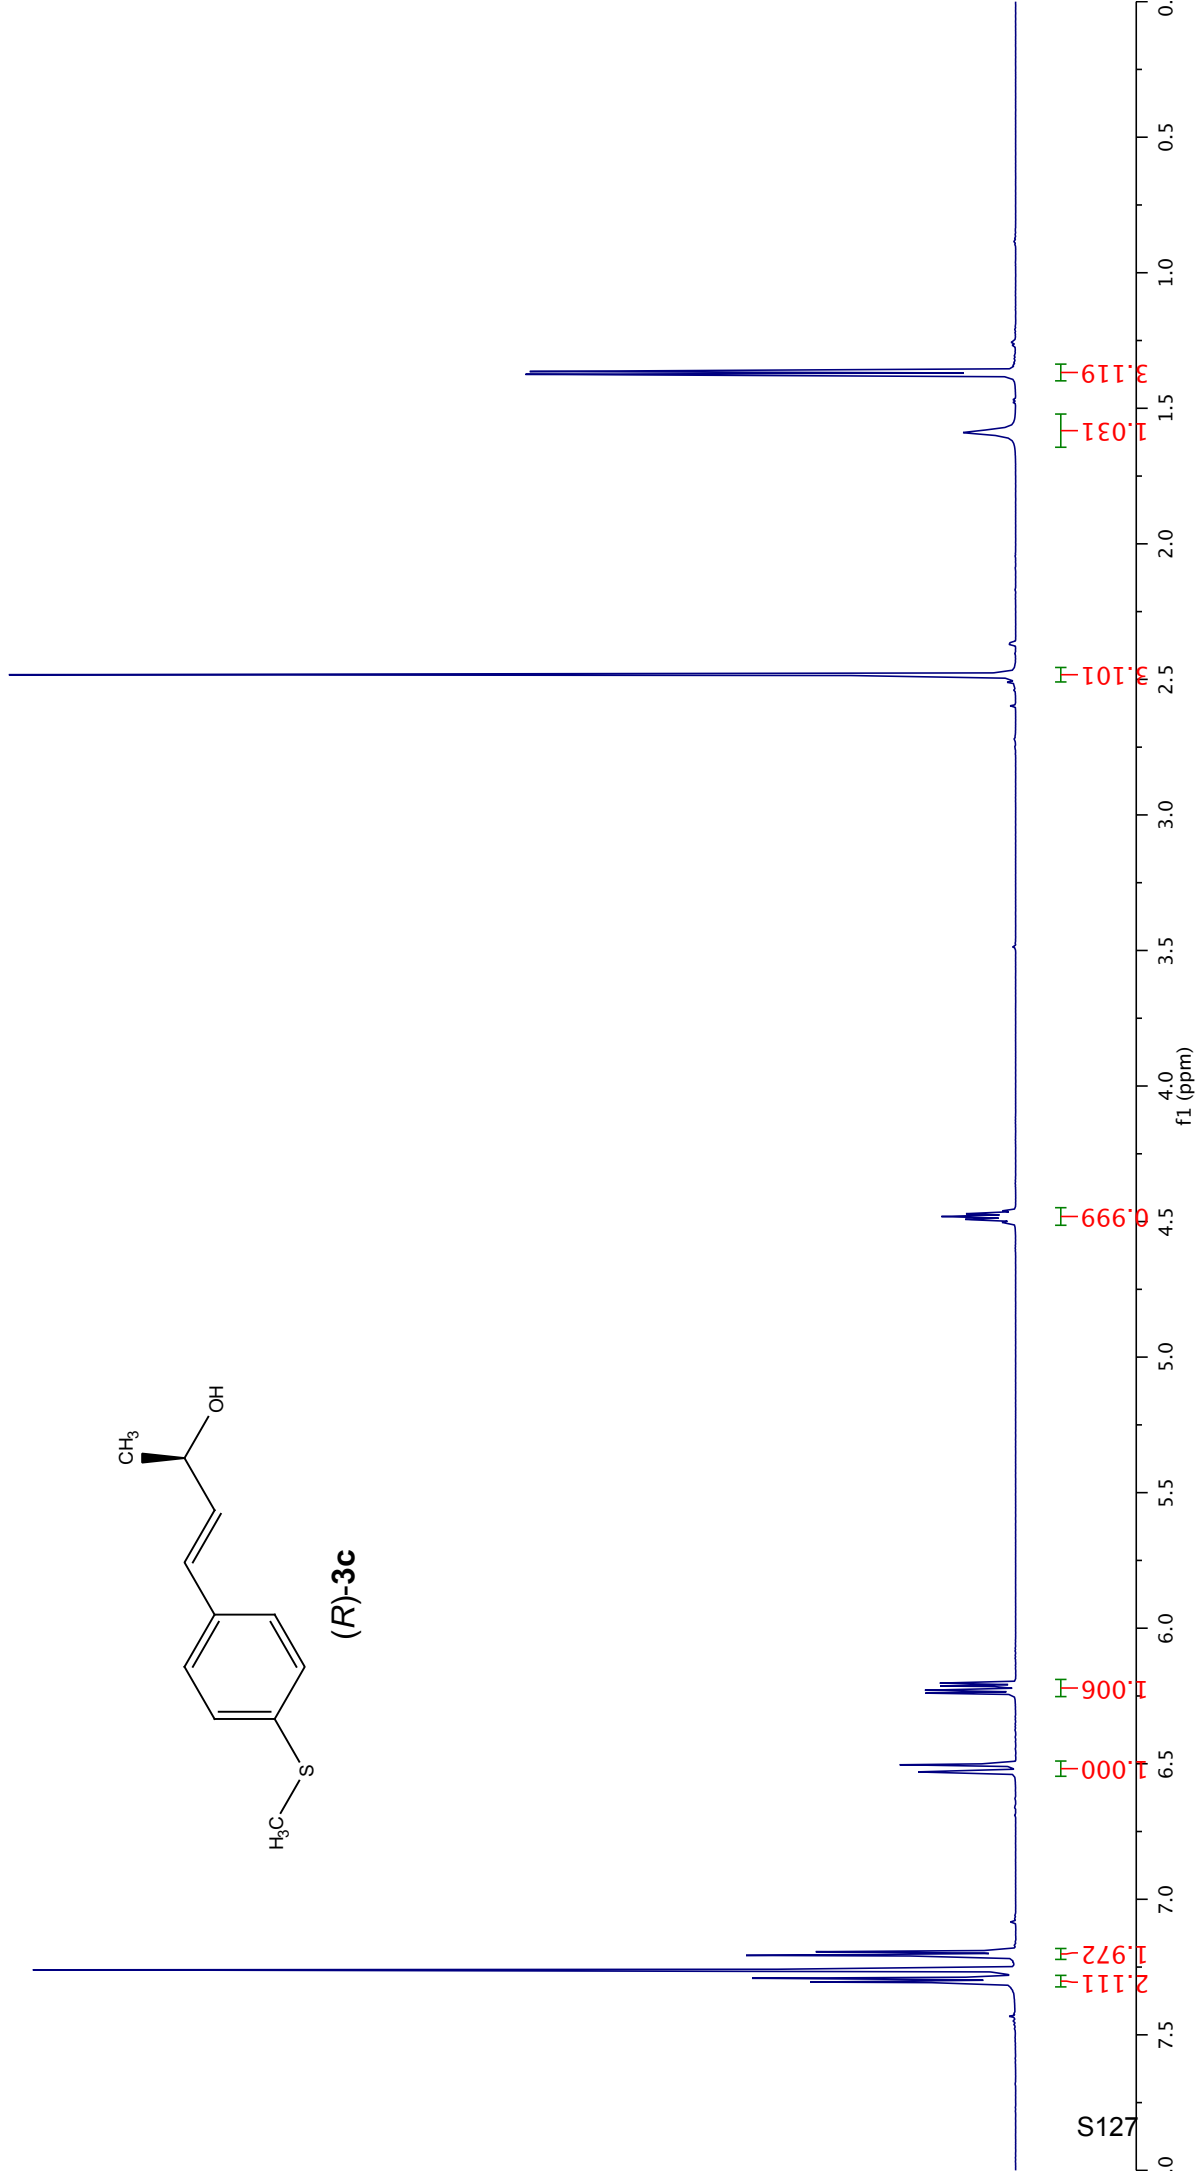

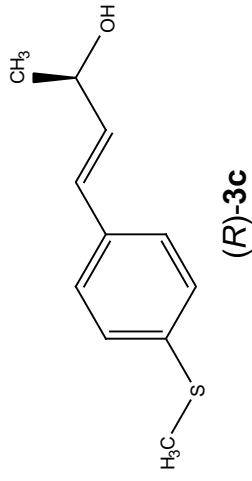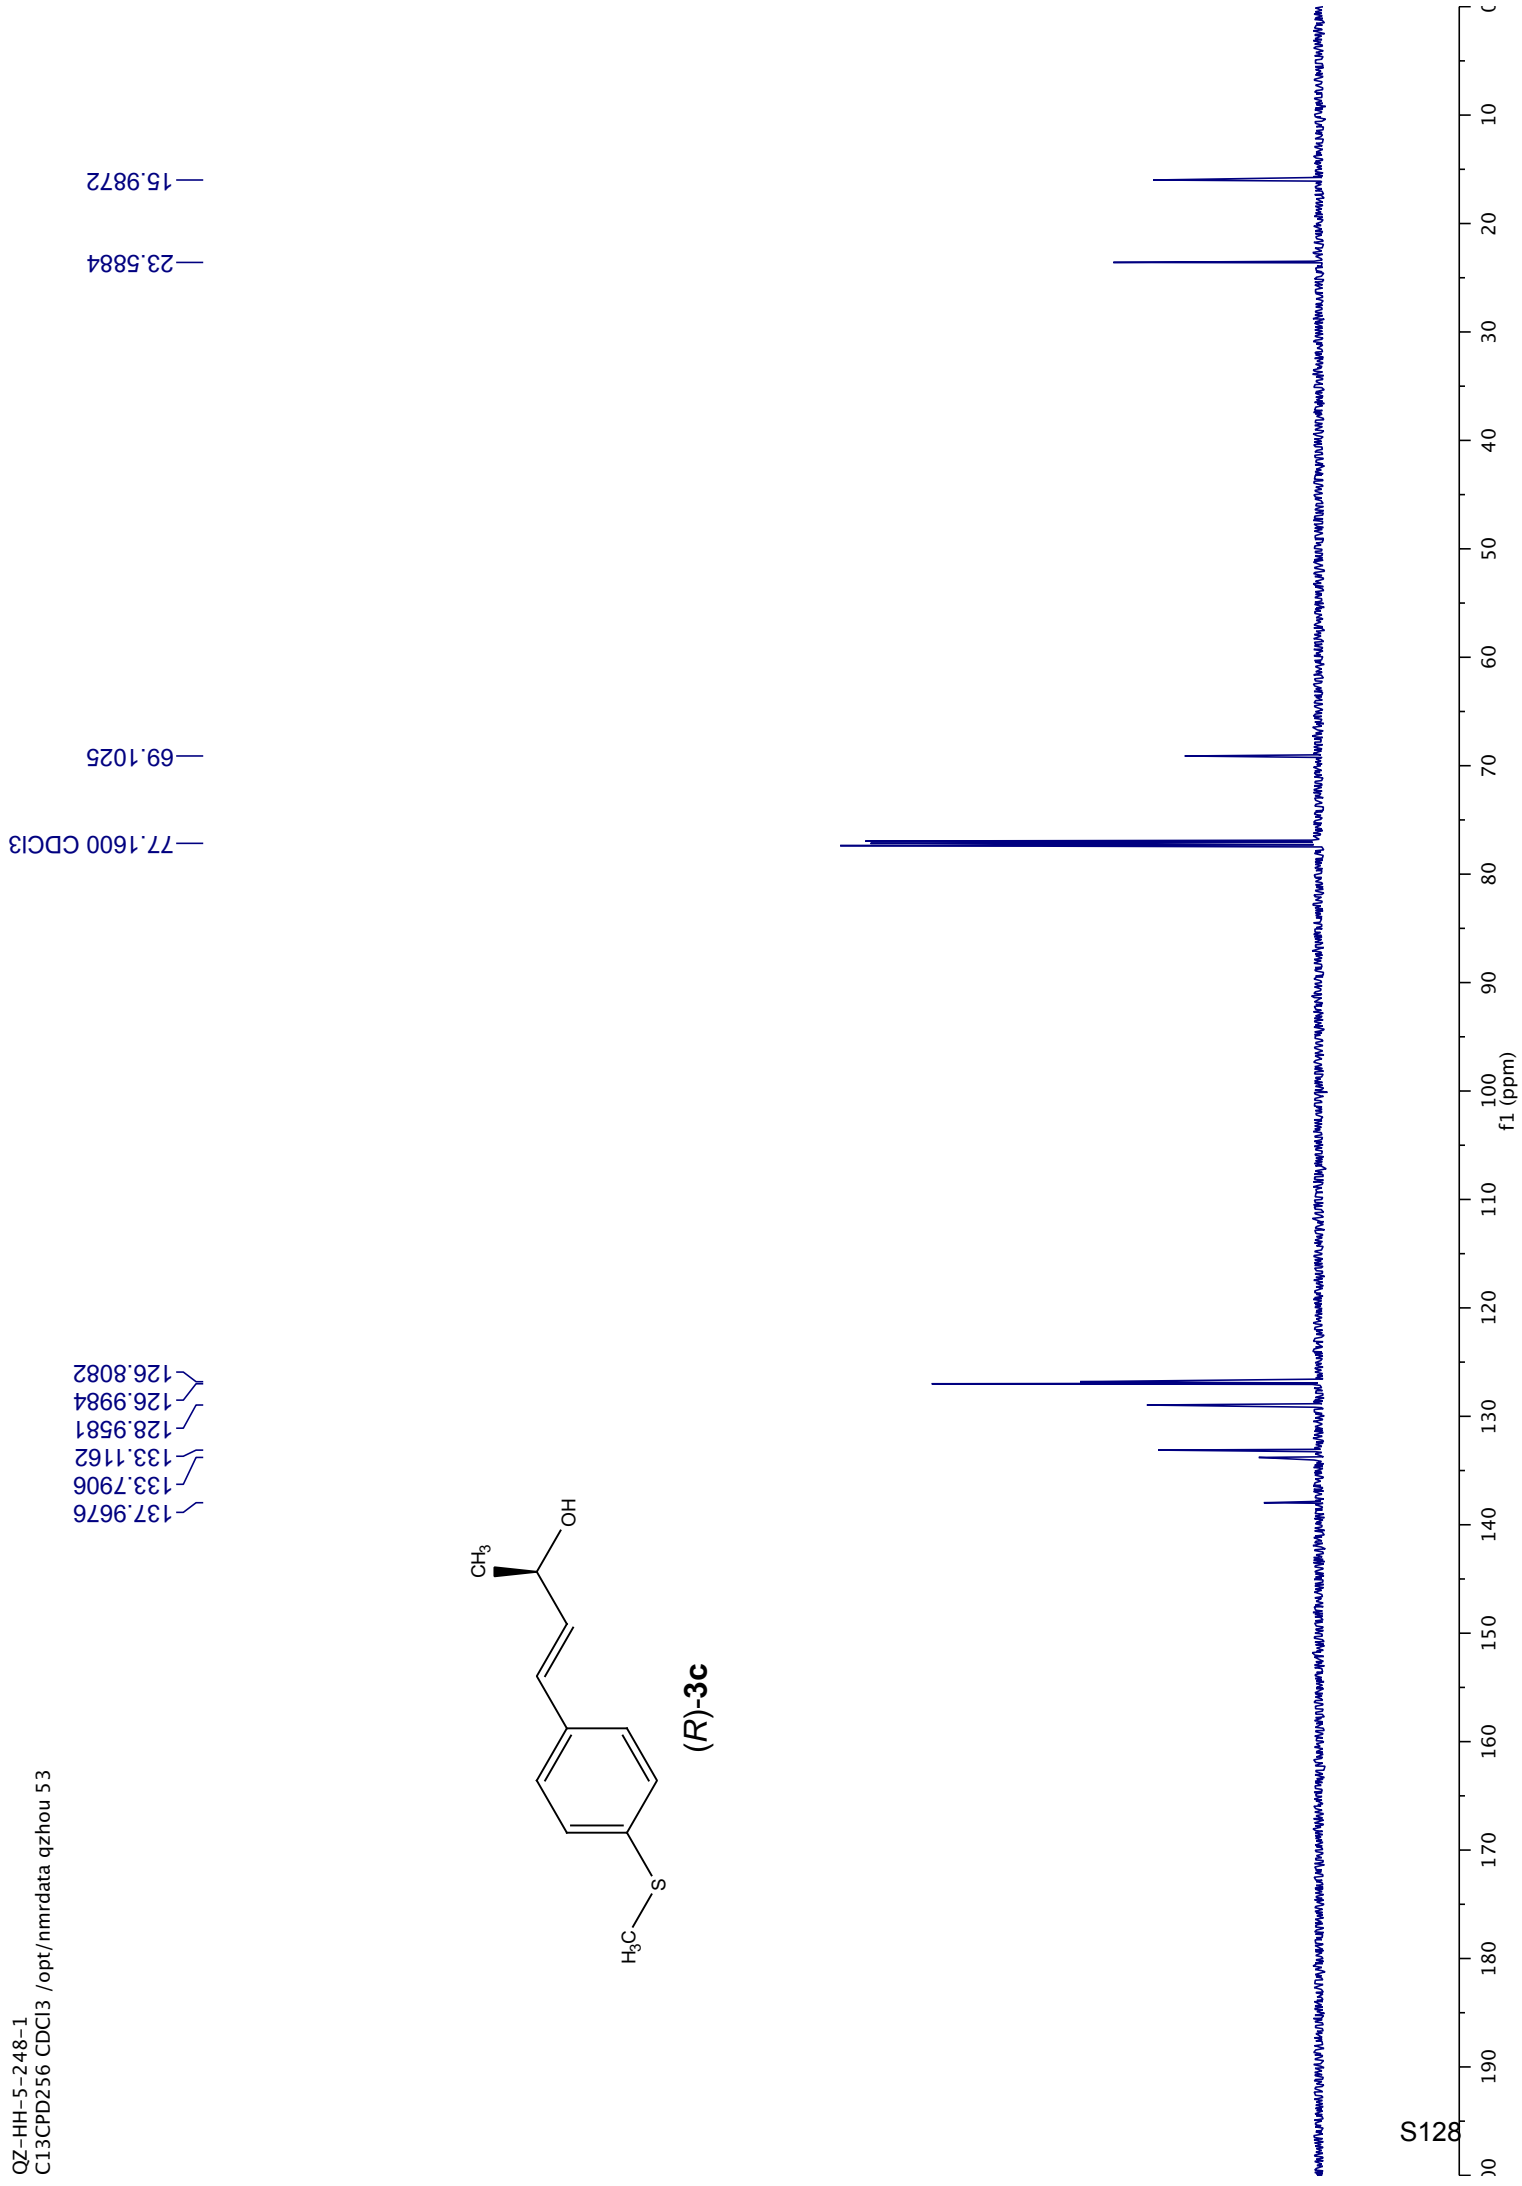



7.7820  
7.7794  
7.7776  
7.7706  
7.7691  
7.7670  
7.7665  
7.7034  
7.6955  
7.6930  
7.6911  
7.3418  
7.3323  
7.3297  
7.3226  
7.3207  
7.3187  
7.3171  
7.3098  
7.3071  
7.2978  
7.2836  
7.1695  
6.8511  
6.8498  
6.8484  
6.8249  
6.8234  
6.8220  
6.2393  
6.2293  
6.2133  
6.2033  
4.5482  
4.5375  
4.5269

1.6222  
1.6216  
1.5753  
1.4252  
1.4145

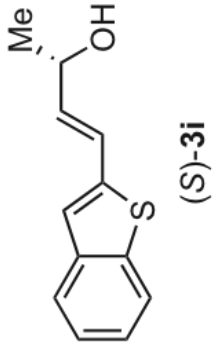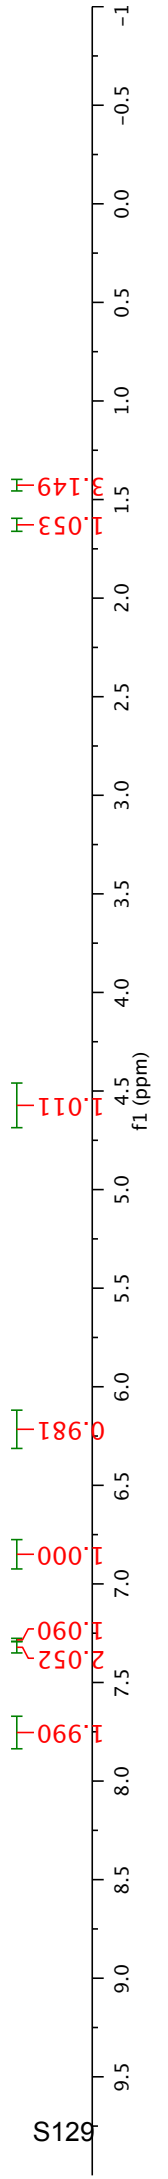

141.9790  
140.0511  
138.8948  
135.8166  
124.6775  
124.4244  
123.4246  
123.1732  
122.9700  
122.2087

68.4839  
23.3775

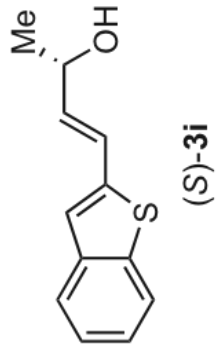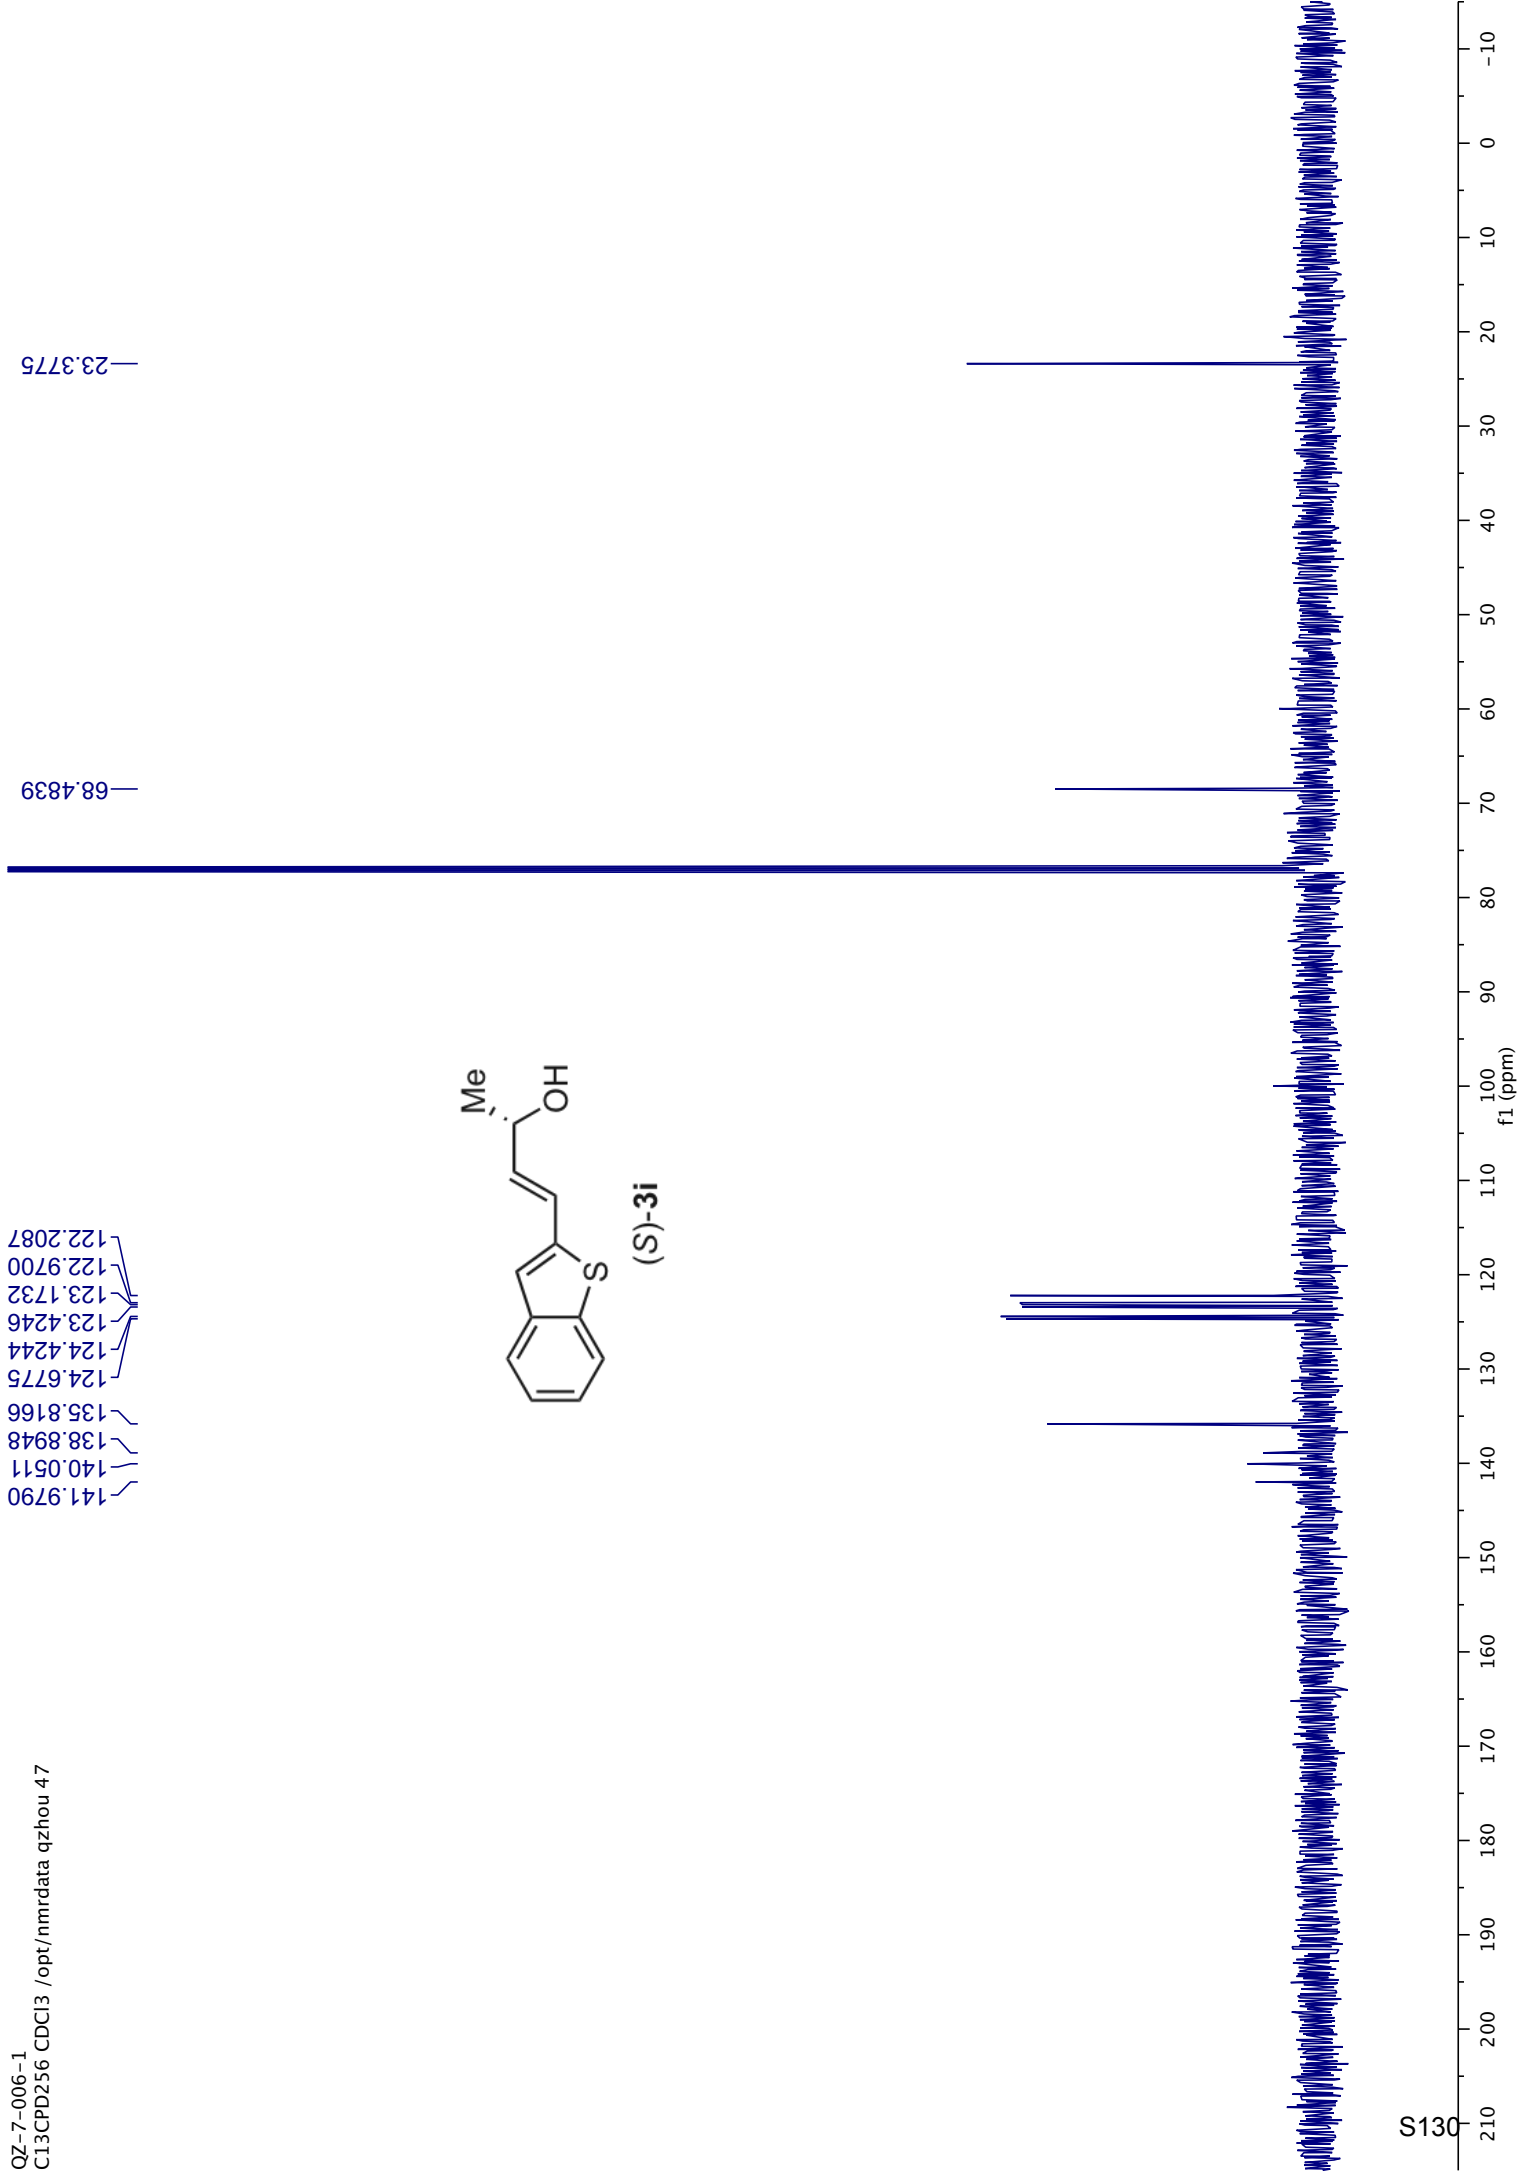

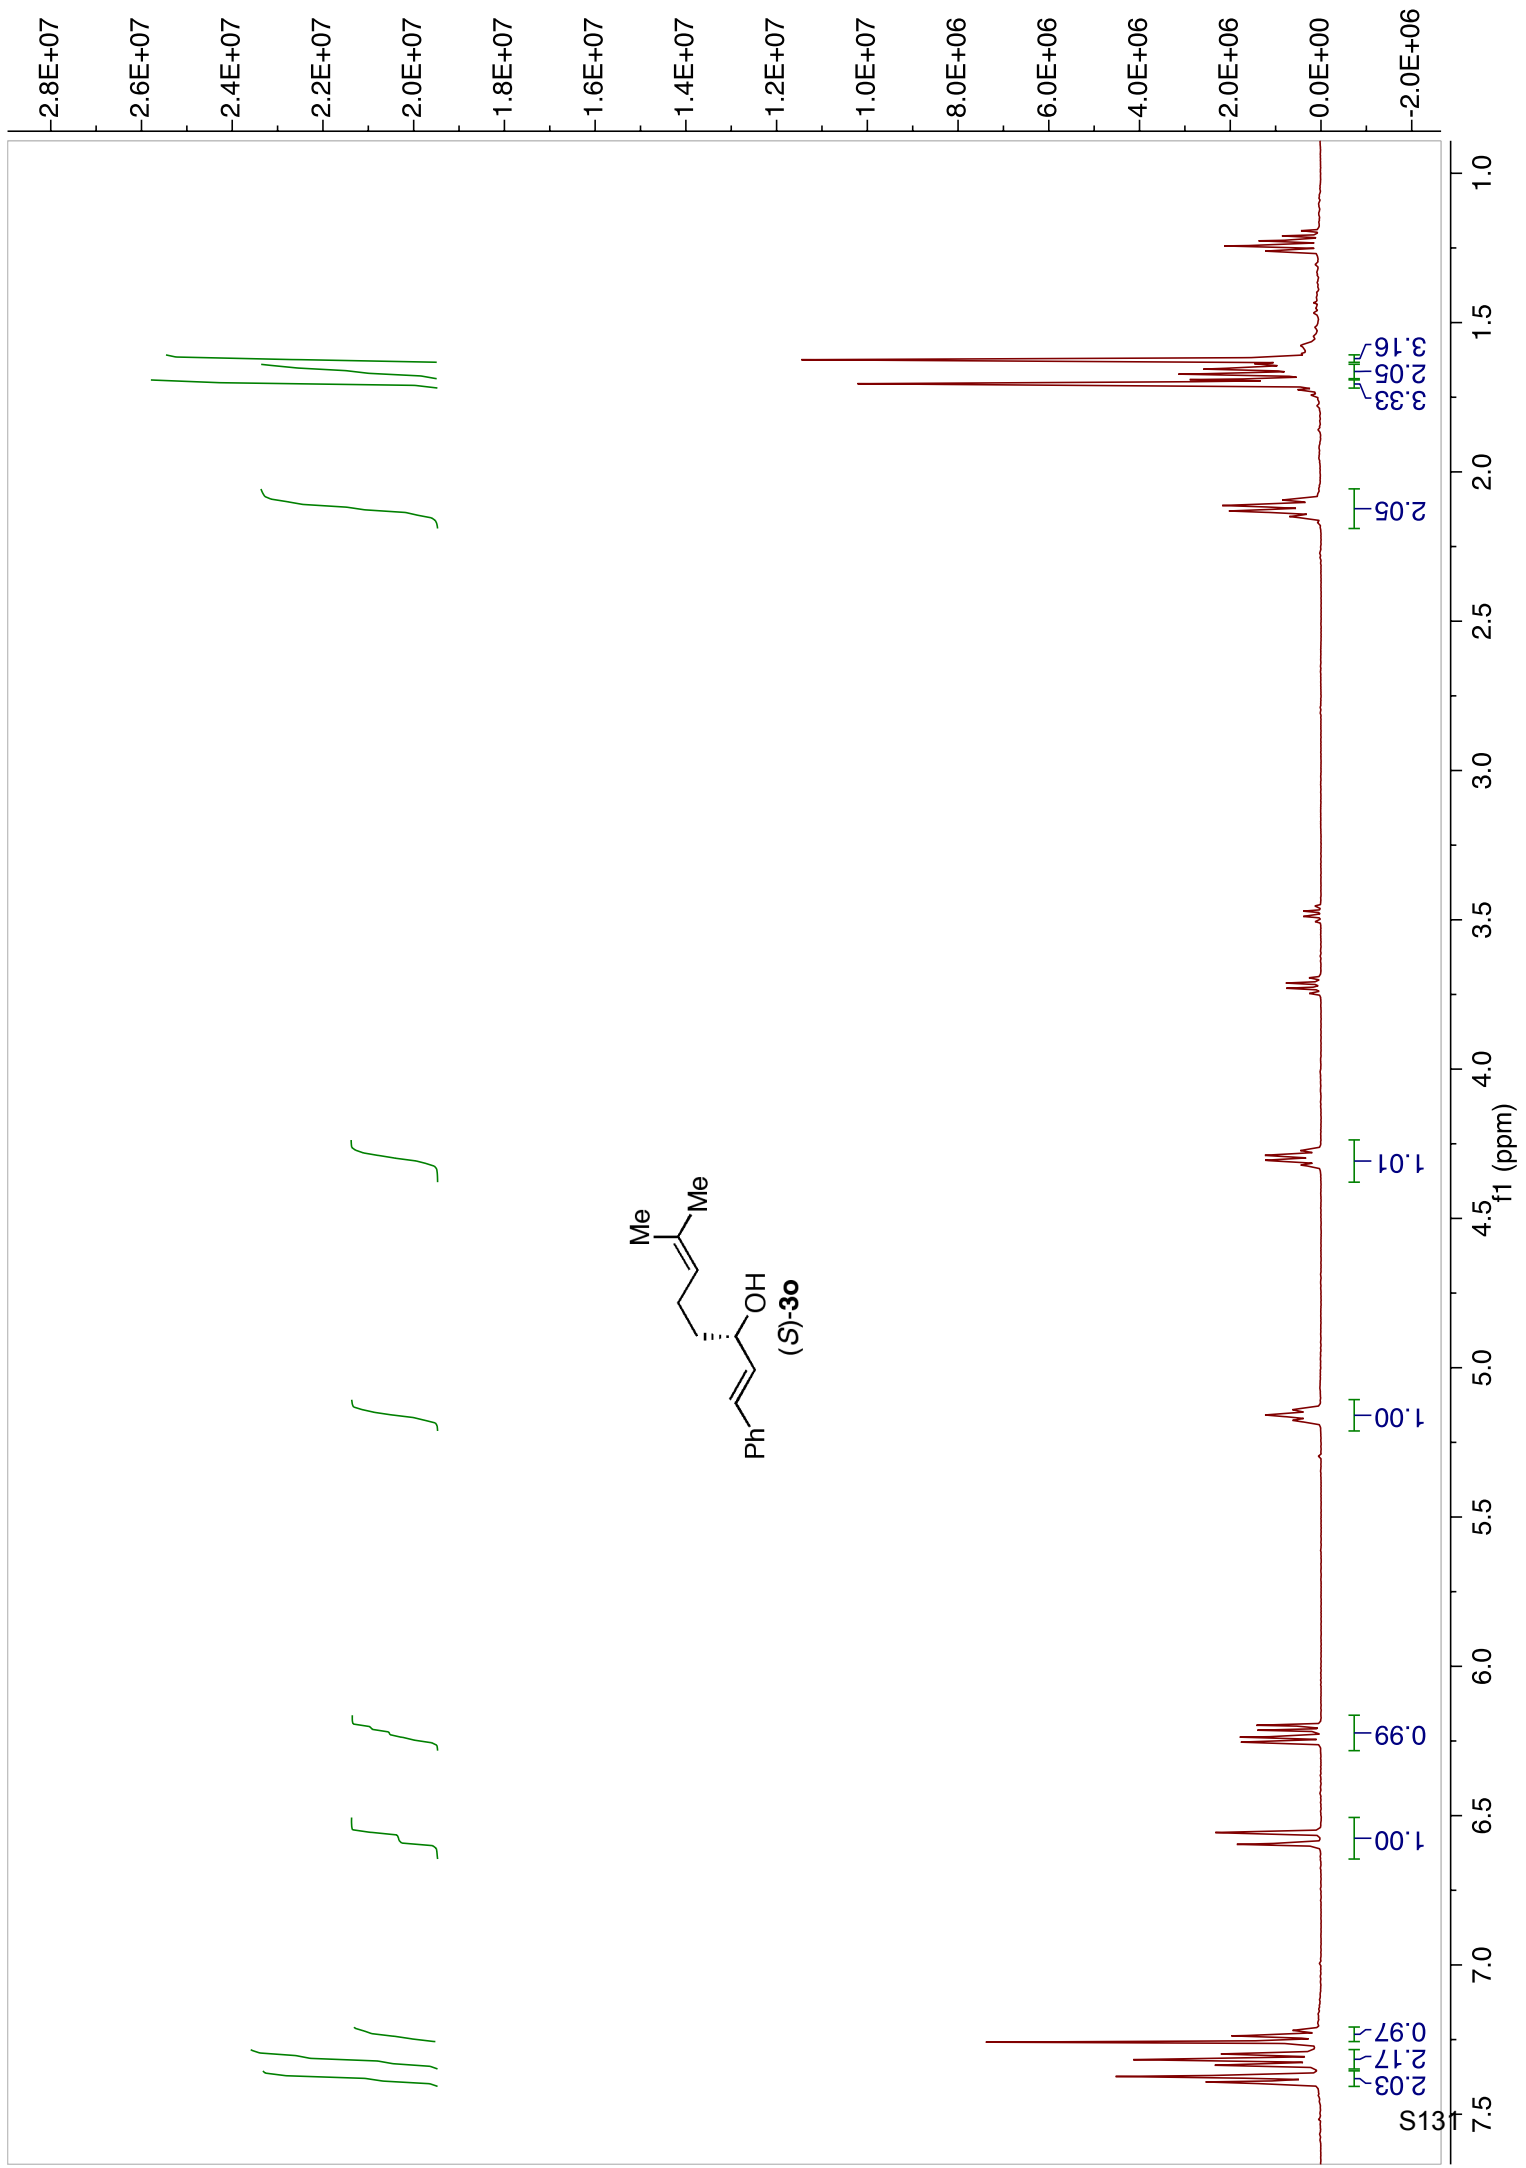

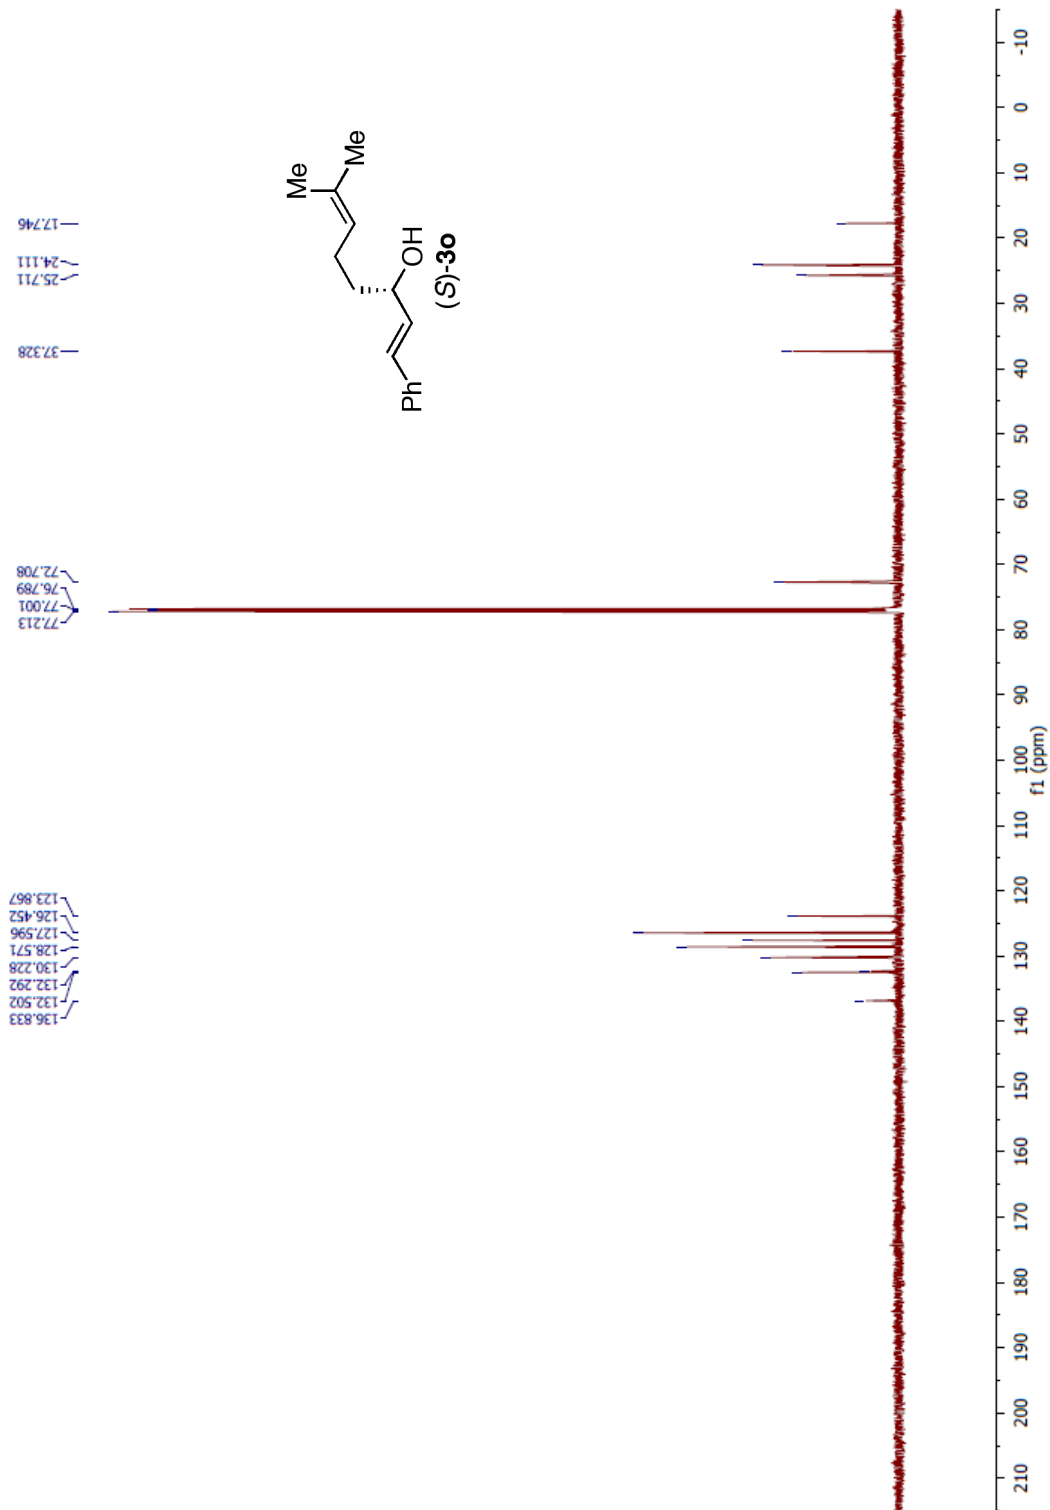

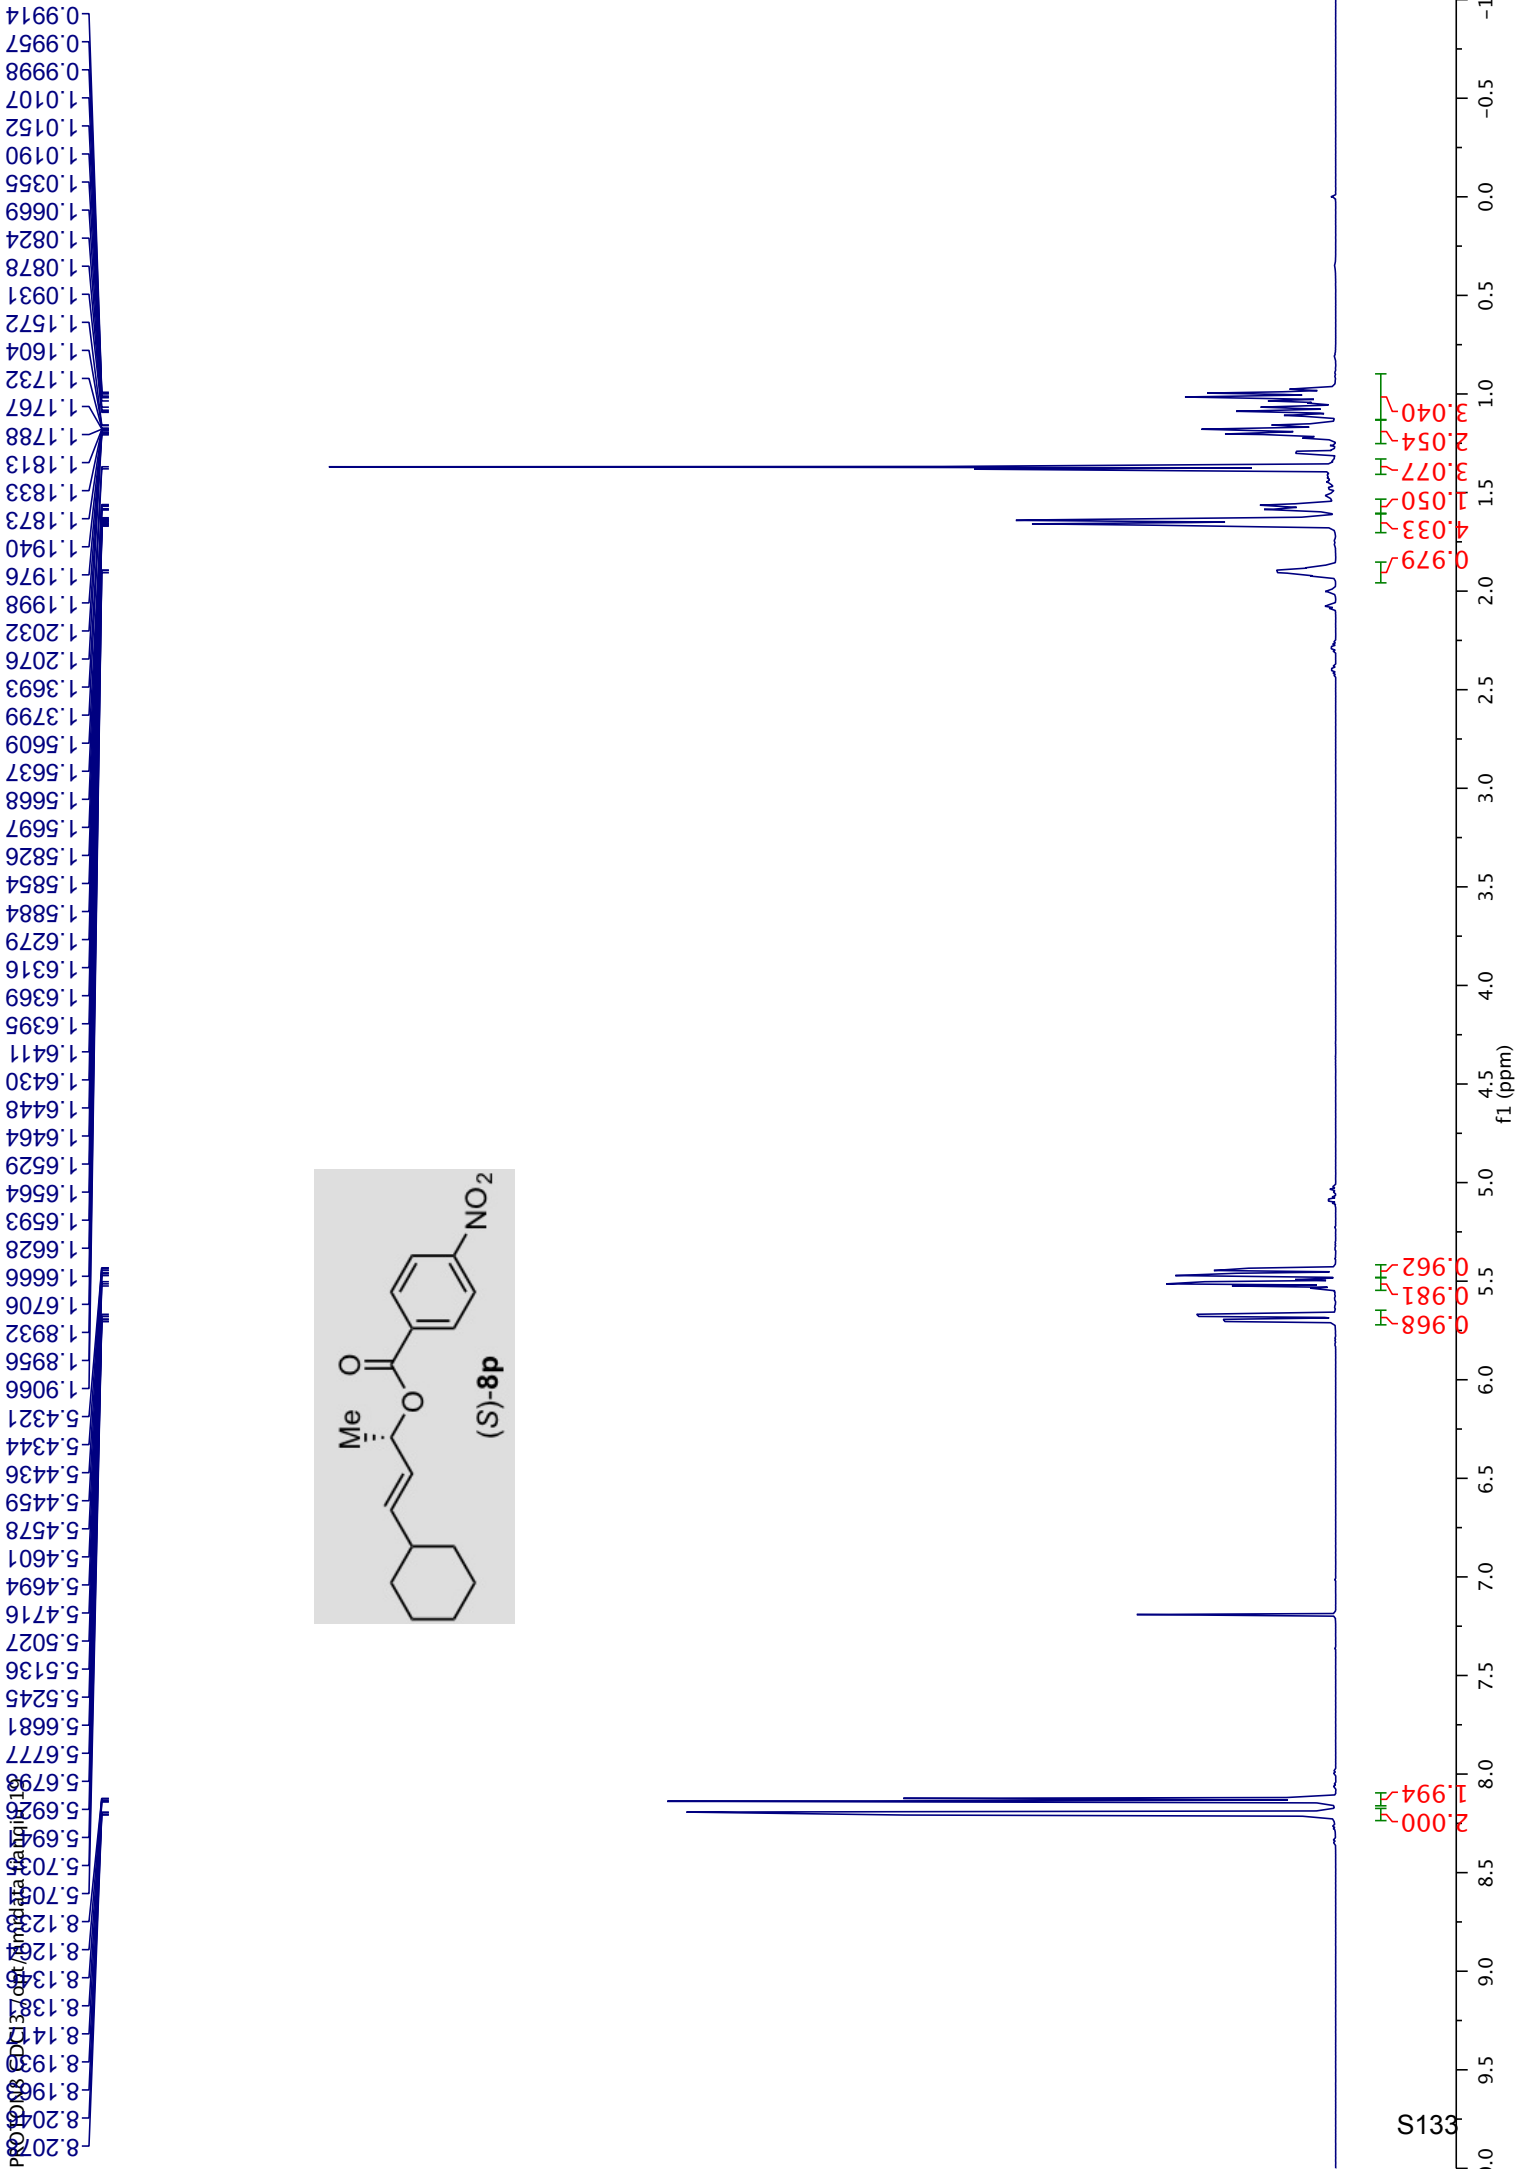

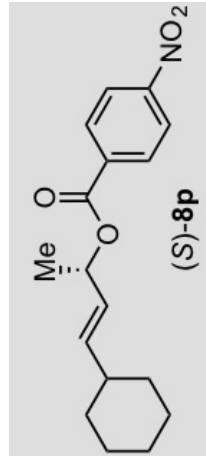

77.2302 CDC13  
77.0192 CDC13  
76.8077 CDC13  
73.3608

40.2291

32.6077  
32.5677

26.1000  
25.9508  
25.9378  
20.5268

163.9327

150.4269

139.9929  
136.3442

130.6605  
126.3349  
123.4276

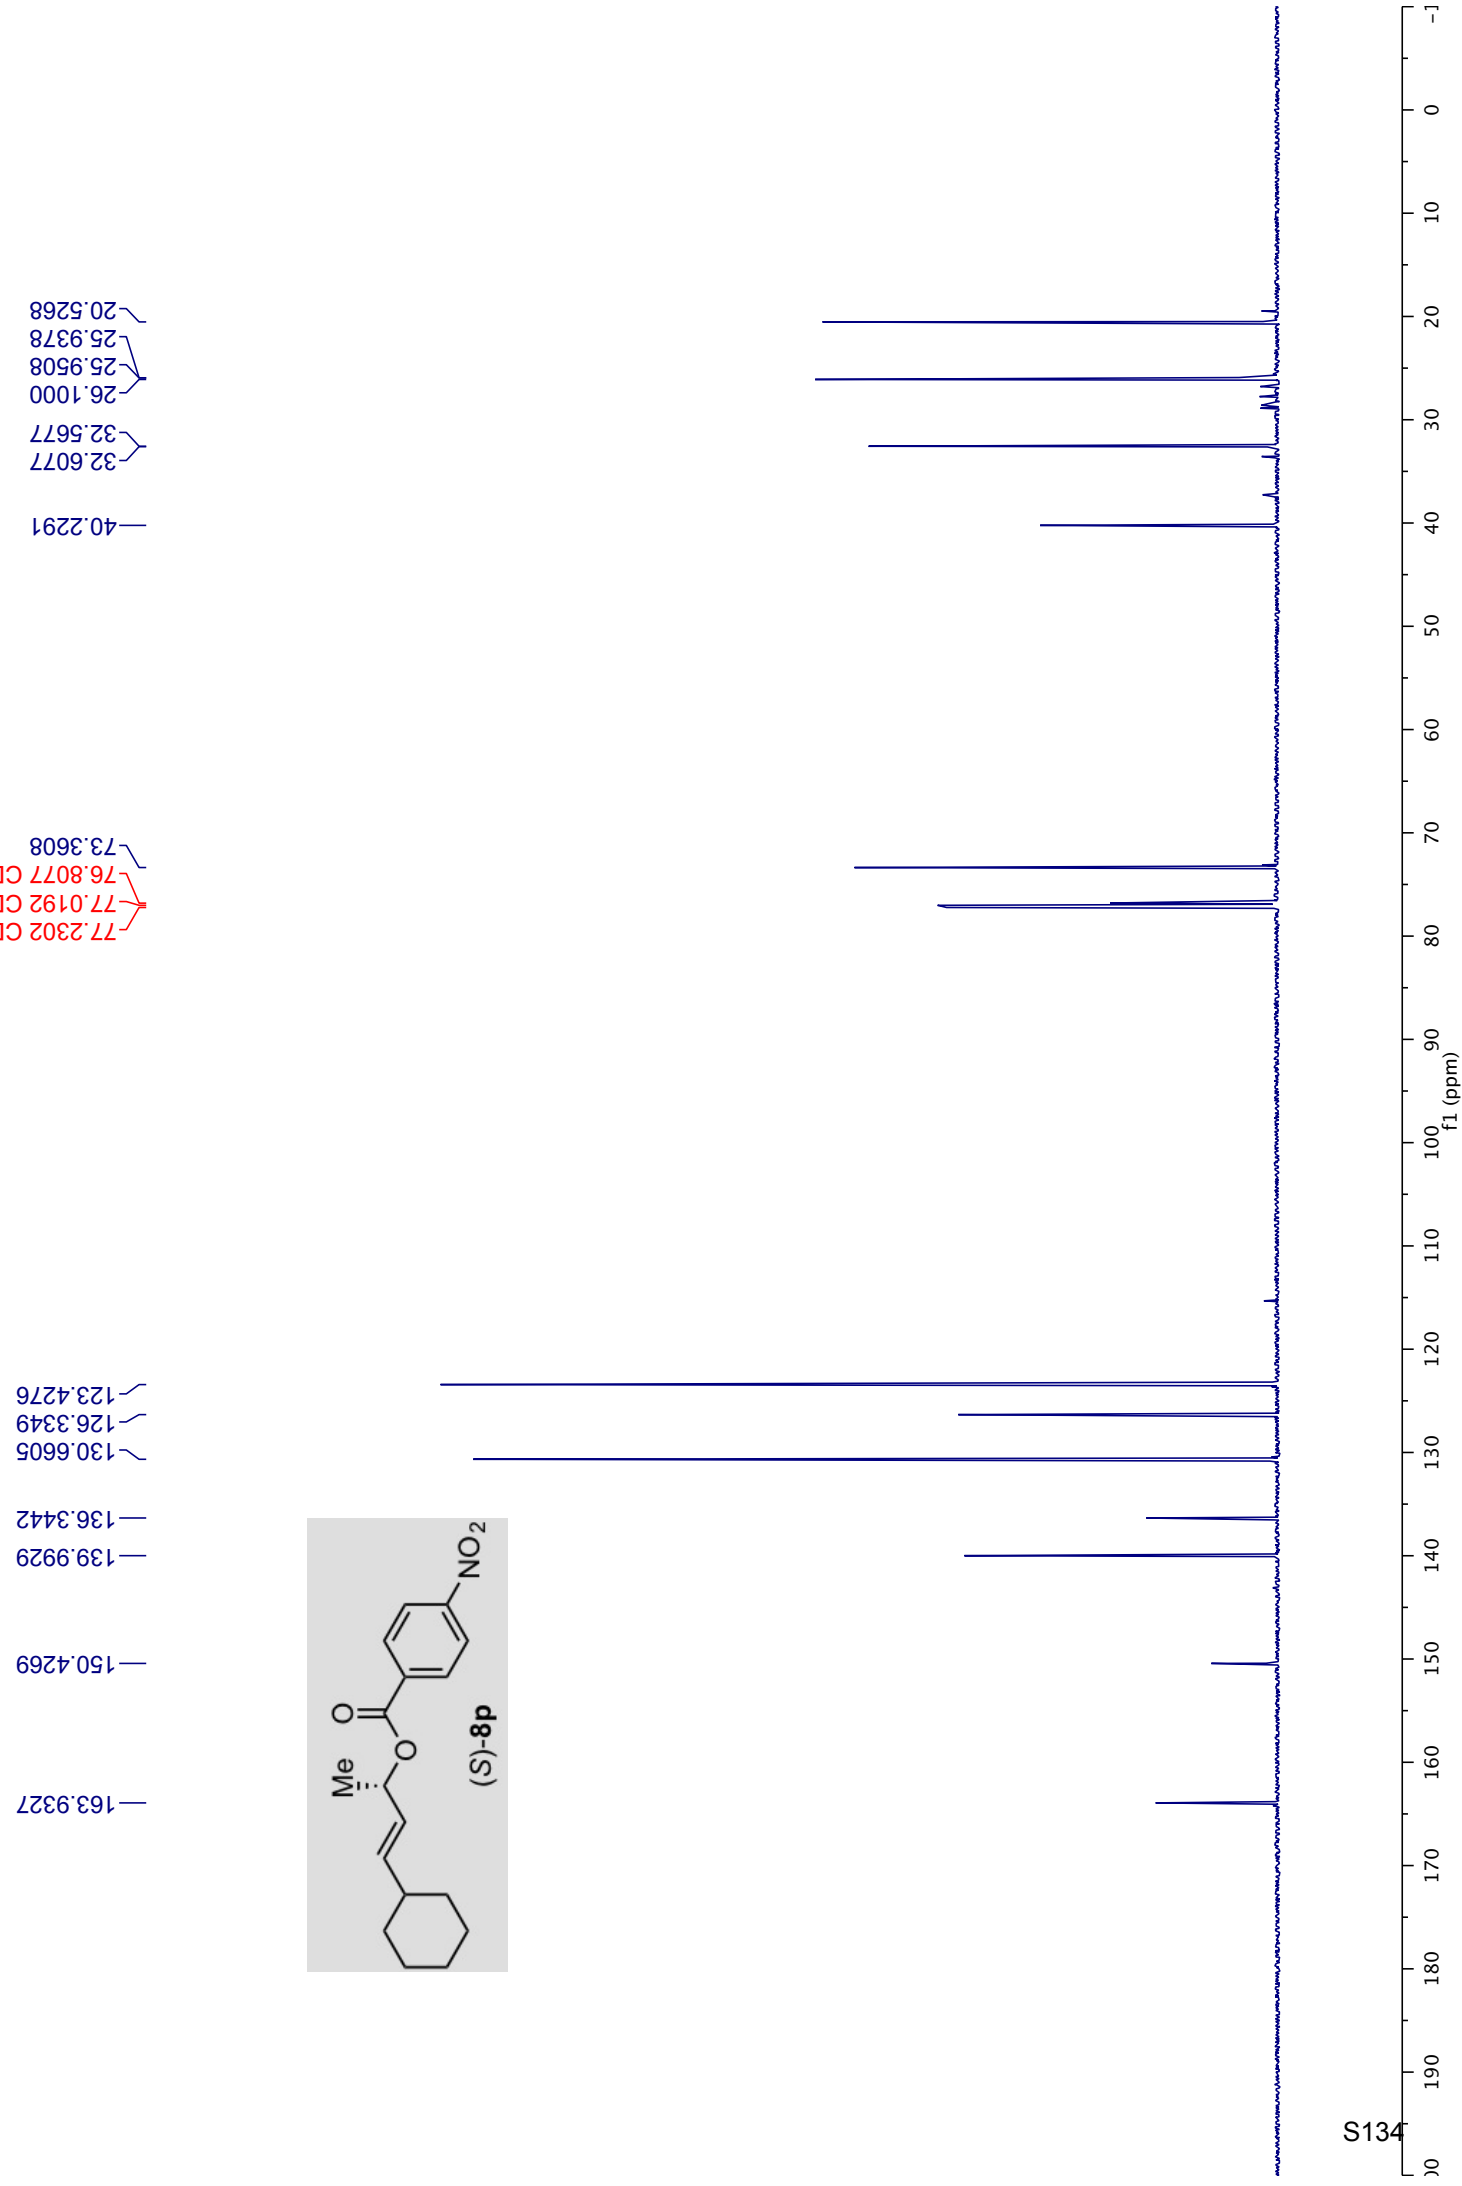

**Racemic 3a**

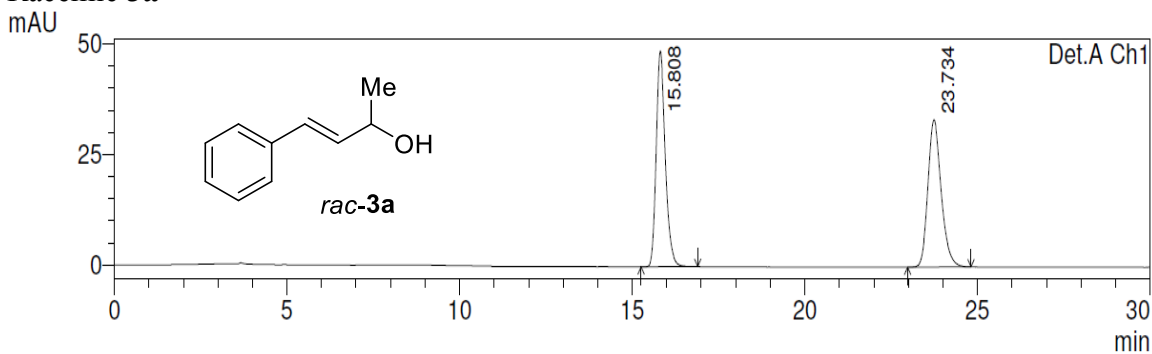

Detector A Ch1 254nm

| Peak# | Ret. Time | Area    | Height | Area %  | Height % |
|-------|-----------|---------|--------|---------|----------|
| 1     | 15.808    | 889522  | 48719  | 50.041  | 59.440   |
| 2     | 23.734    | 888065  | 33244  | 49.959  | 40.560   |
| Total |           | 1777588 | 81962  | 100.000 | 100.000  |

**Enantioenriched, (R)-3a, 96% ee (retention)**

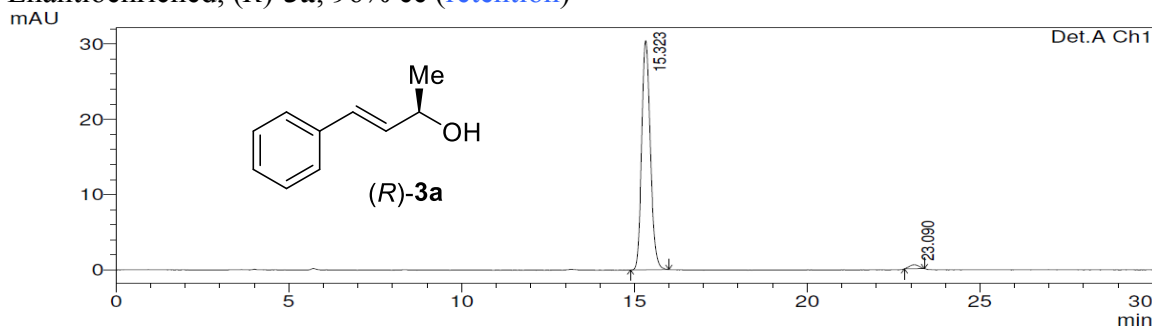

Detector A Ch1 254nm

| Peak# | Ret. Time | Area   | Height | Area %  | Height % |
|-------|-----------|--------|--------|---------|----------|
| 1     | 15.323    | 528124 | 30438  | 98.074  | 98.283   |
| 2     | 23.090    | 10373  | 532    | 1.926   | 1.717    |
| Total |           | 538497 | 30970  | 100.000 | 100.000  |

**Enantioenriched, (S)-3a, 87% ee (inversion)**

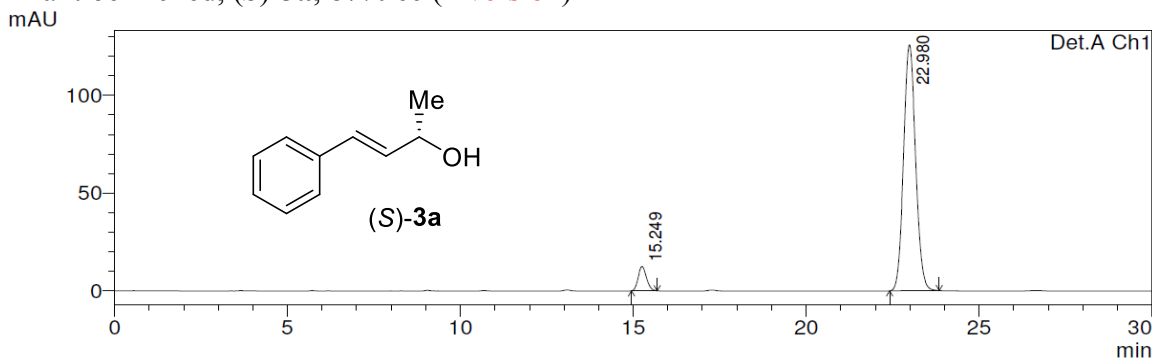

Detector A Ch1 254nm

| Peak# | Ret. Time | Area    | Height | Area %  | Height % |
|-------|-----------|---------|--------|---------|----------|
| 1     | 15.249    | 207636  | 12445  | 6.383   | 8.990    |
| 2     | 22.980    | 3045555 | 125979 | 93.617  | 91.010   |
| Total |           | 3253191 | 138424 | 100.000 | 100.000  |

Racemic **3b**

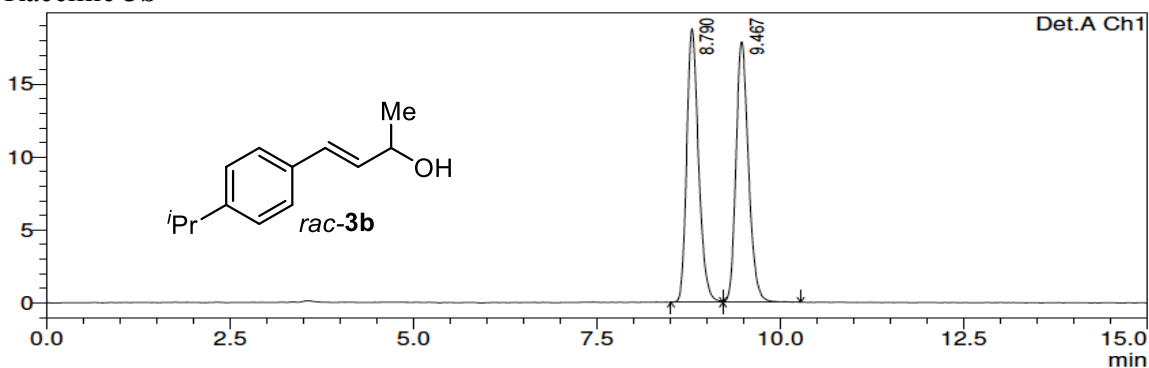

Detector A Ch1 254nm

| Peak# | Ret. Time | Area   | Height | Area %  | Height % |
|-------|-----------|--------|--------|---------|----------|
| 1     | 8.790     | 211145 | 18772  | 49.867  | 51.230   |
| 2     | 9.467     | 212268 | 17871  | 50.133  | 48.770   |
| Total |           | 423413 | 36644  | 100.000 | 100.000  |

Enantioenriched, (*S*)-**3b**, 84% ee (retention)

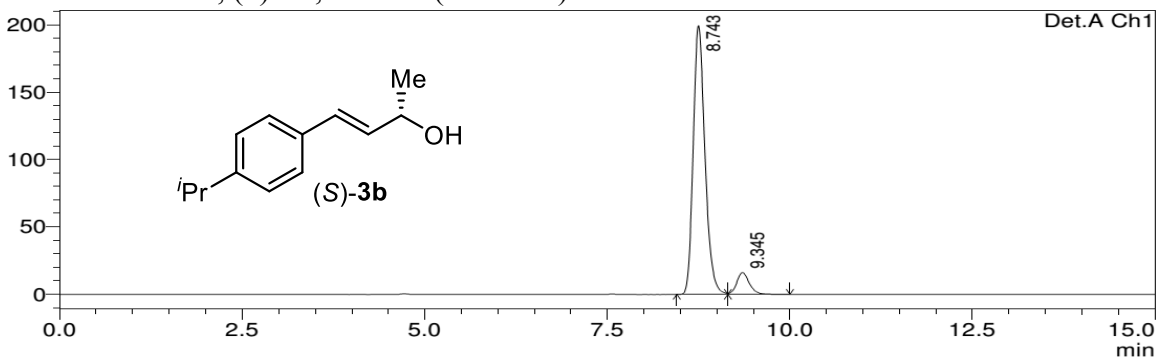

Detector A Ch1 254nm

| Peak# | Ret. Time | Area    | Height | Area %  | Height % |
|-------|-----------|---------|--------|---------|----------|
| 1     | 8.743     | 2240792 | 199732 | 91.989  | 92.449   |
| 2     | 9.345     | 195138  | 16313  | 8.011   | 7.551    |
| Total |           | 2435930 | 216045 | 100.000 | 100.000  |

Enantioenriched, (*R*)-**3b**, 83% ee (inversion)

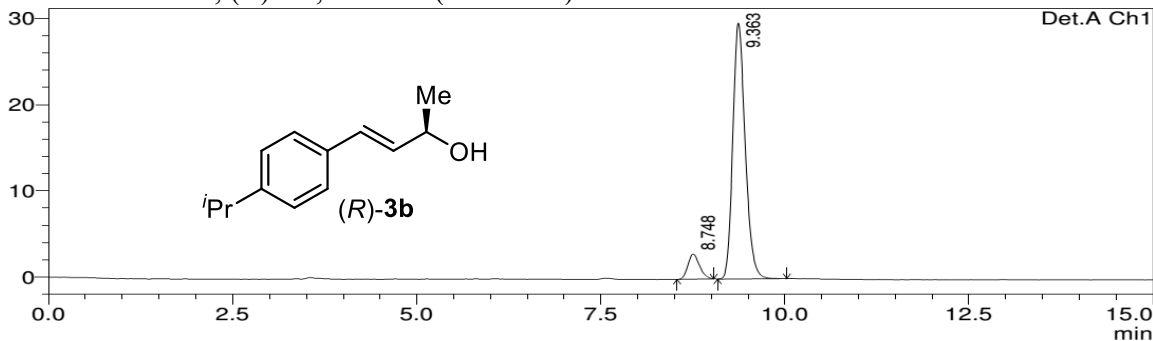

Detector A Ch1 254nm

| Peak# | Ret. Time | Area   | Height | Area %  | Height % |
|-------|-----------|--------|--------|---------|----------|
| 1     | 8.748     | 31741  | 2896   | 8.340   | 8.888    |
| 2     | 9.363     | 348823 | 29690  | 91.660  | 91.112   |
| Total |           | 380564 | 32586  | 100.000 | 100.000  |



Racemic **3c**

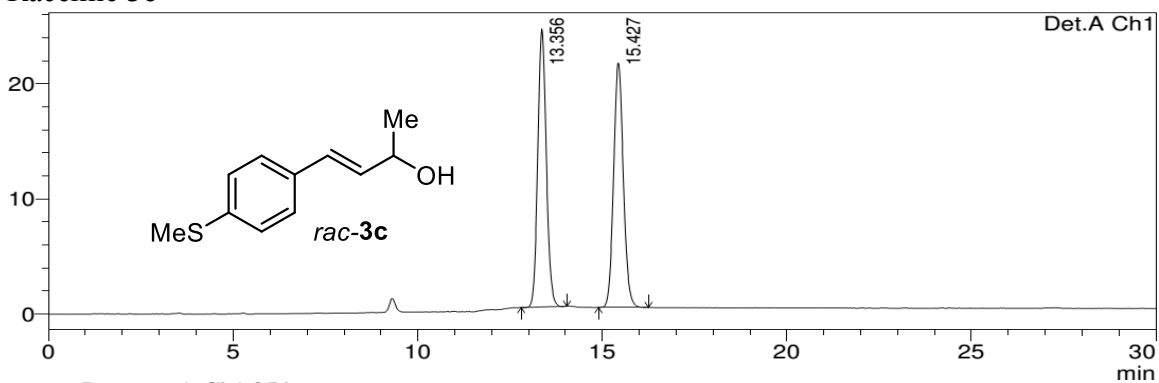

Detector A Ch1 254nm

| Peak# | Ret. Time | Area   | Height | Area %  | Height % |
|-------|-----------|--------|--------|---------|----------|
| 1     | 13.356    | 389340 | 24178  | 49.812  | 53.186   |
| 2     | 15.427    | 392281 | 21282  | 50.188  | 46.814   |
| Total |           | 781621 | 45460  | 100.000 | 100.000  |

Enantioenriched, (*R*)-**3c**, 88% ee (retention)

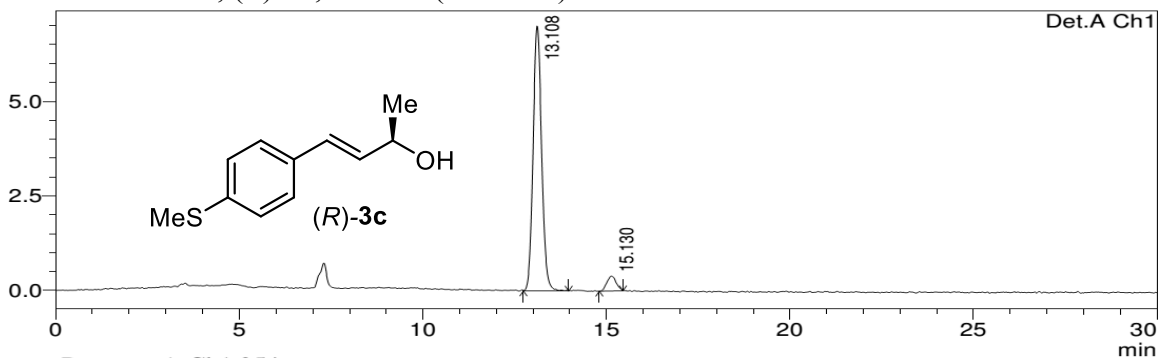

Detector A Ch1 254nm

| Peak# | Ret. Time | Area   | Height | Area %  | Height % |
|-------|-----------|--------|--------|---------|----------|
| 1     | 13.108    | 113915 | 7009   | 94.209  | 94.665   |
| 2     | 15.130    | 7002   | 395    | 5.791   | 5.335    |
| Total |           | 120917 | 7404   | 100.000 | 100.000  |

Enantioenriched, (*S*)-**3c**, 84% ee (inversion)

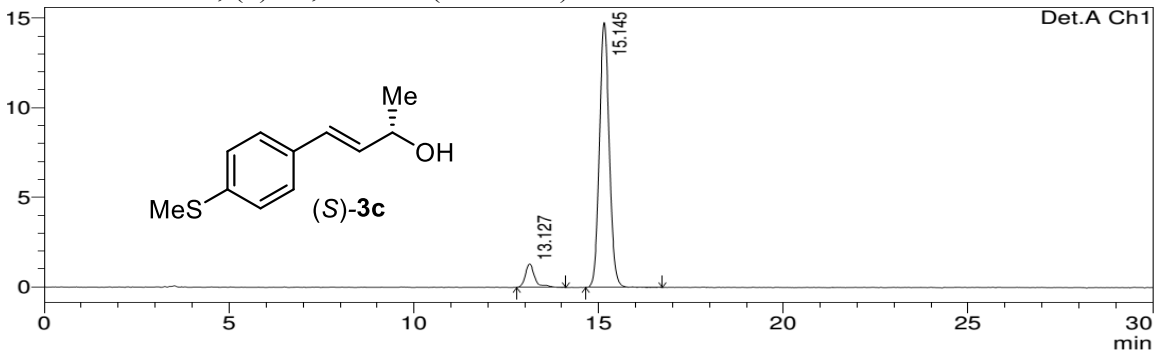

Detector A Ch1 254nm

| Peak# | Ret. Time | Area   | Height | Area %  | Height % |
|-------|-----------|--------|--------|---------|----------|
| 1     | 13.127    | 24170  | 1326   | 8.070   | 8.226    |
| 2     | 15.145    | 275327 | 14796  | 91.930  | 91.774   |
| Total |           | 299497 | 16122  | 100.000 | 100.000  |

Racemic **3d**

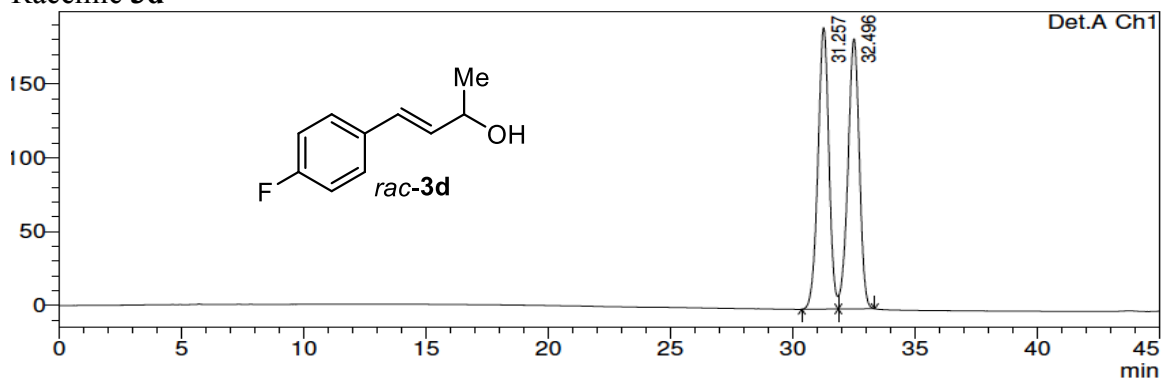

Detector A Ch1 254nm

| Peak# | Ret. Time | Area     | Height | Area %  | Height % |
|-------|-----------|----------|--------|---------|----------|
| 1     | 31.257    | 5951764  | 190544 | 50.088  | 51.022   |
| 2     | 32.496    | 5930932  | 182911 | 49.912  | 48.978   |
| Total |           | 11882696 | 373455 | 100.000 | 100.000  |

Enantioenriched, (*R*)-**3d**, 94% ee (retention)

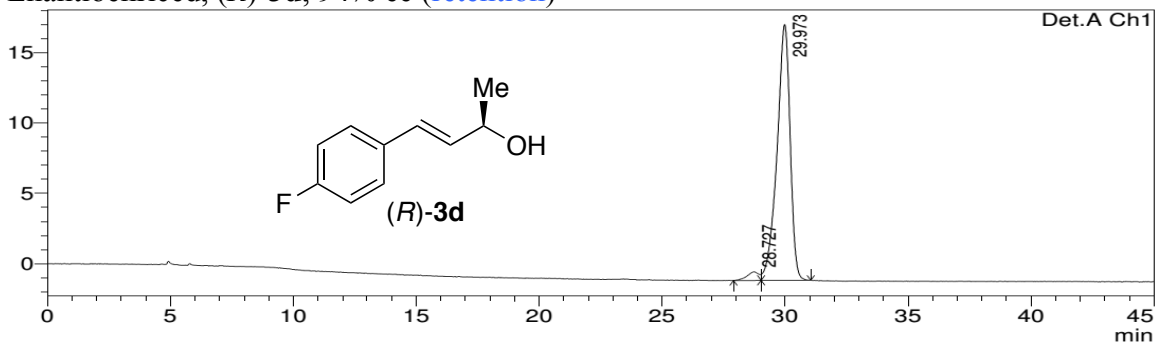

Detector A Ch1 254nm

| Peak# | Ret. Time | Area   | Height | Area %  | Height % |
|-------|-----------|--------|--------|---------|----------|
| 1     | 28.727    | 20598  | 612    | 2.953   | 3.257    |
| 2     | 29.973    | 676929 | 18171  | 97.047  | 96.743   |
| Total |           | 697527 | 18783  | 100.000 | 100.000  |

Enantioenriched, (*S*)-**3d**, 89% ee (inversion)

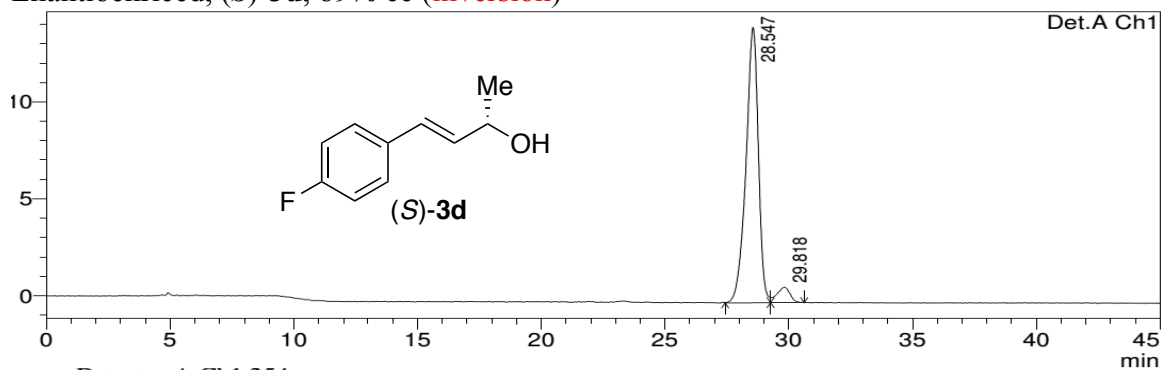

Detector A Ch1 254nm

| Peak# | Ret. Time | Area   | Height | Area %  | Height % |
|-------|-----------|--------|--------|---------|----------|
| 1     | 28.547    | 495380 | 14213  | 94.393  | 94.670   |
| 2     | 29.818    | 29425  | 800    | 5.607   | 5.330    |
| Total |           | 524805 | 15013  | 100.000 | 100.000  |

Racemic **3e**

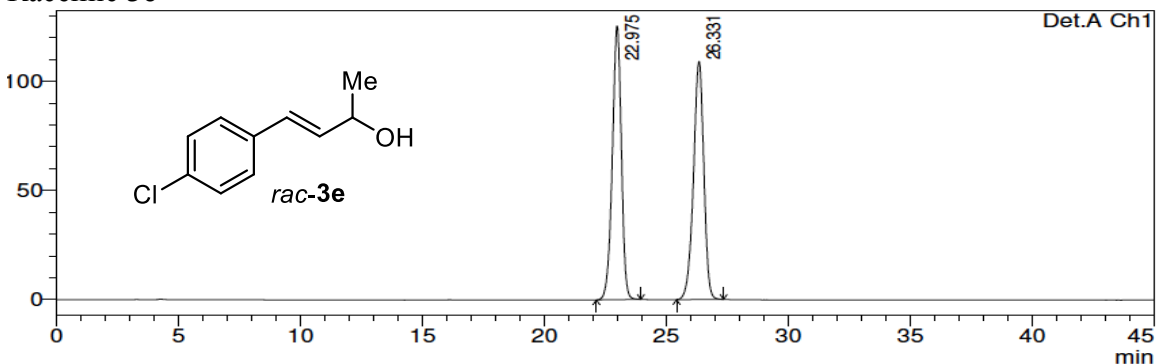

Detector A Ch1 254nm

| Peak# | Ret. Time | Area    | Height | Area %  | Height % |
|-------|-----------|---------|--------|---------|----------|
| 1     | 22.975    | 3227217 | 125247 | 50.021  | 53.460   |
| 2     | 26.331    | 3224470 | 109036 | 49.979  | 46.540   |
| Total |           | 6451687 | 234283 | 100.000 | 100.000  |

Enantioenriched, (*S*)-**3e**, 86% ee (retention)

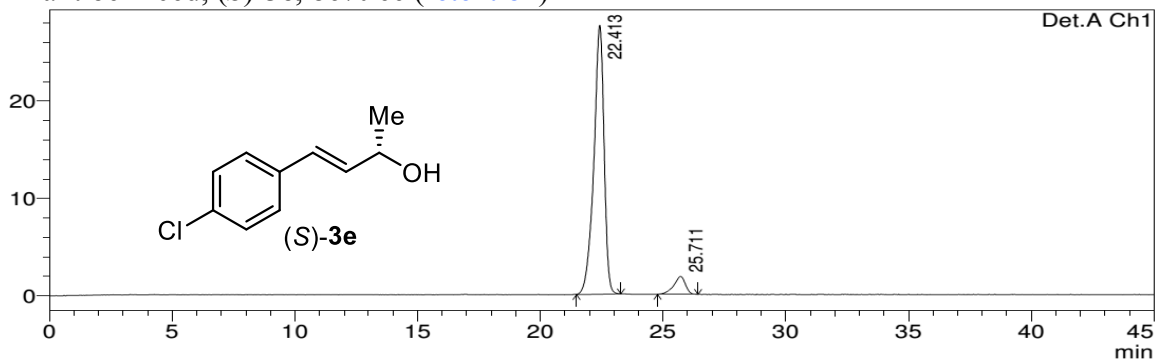

Detector A Ch1 254nm

| Peak# | Ret. Time | Area   | Height | Area %  | Height % |
|-------|-----------|--------|--------|---------|----------|
| 1     | 22.413    | 800719 | 27623  | 92.818  | 93.722   |
| 2     | 25.711    | 61960  | 1850   | 7.182   | 6.278    |
| Total |           | 862678 | 29474  | 100.000 | 100.000  |

Enantioenriched, (*R*)-**3e**, 82% ee (inversion)

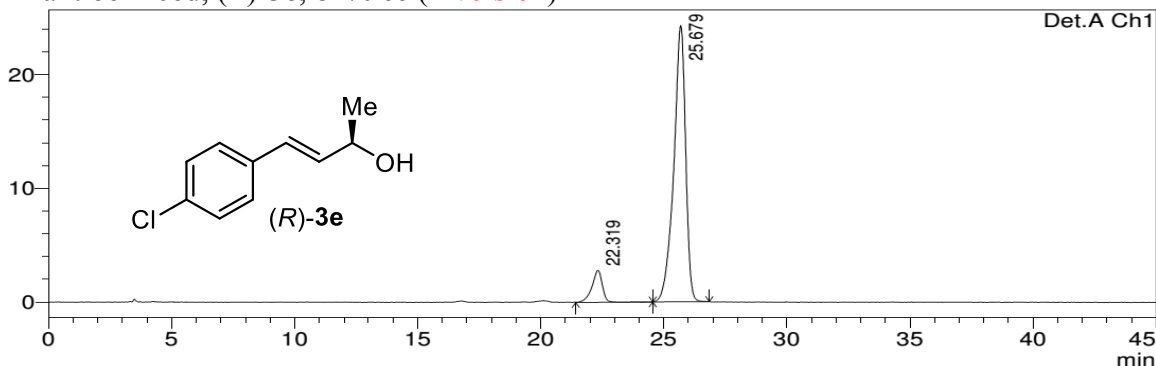

Detector A Ch1 254nm

| Peak# | Ret. Time | Area   | Height | Area %  | Height % |
|-------|-----------|--------|--------|---------|----------|
| 1     | 22.319    | 78955  | 2804   | 8.860   | 10.344   |
| 2     | 25.679    | 812148 | 24305  | 91.140  | 89.656   |
| Total |           | 891102 | 27109  | 100.000 | 100.000  |

Racemic **3f**

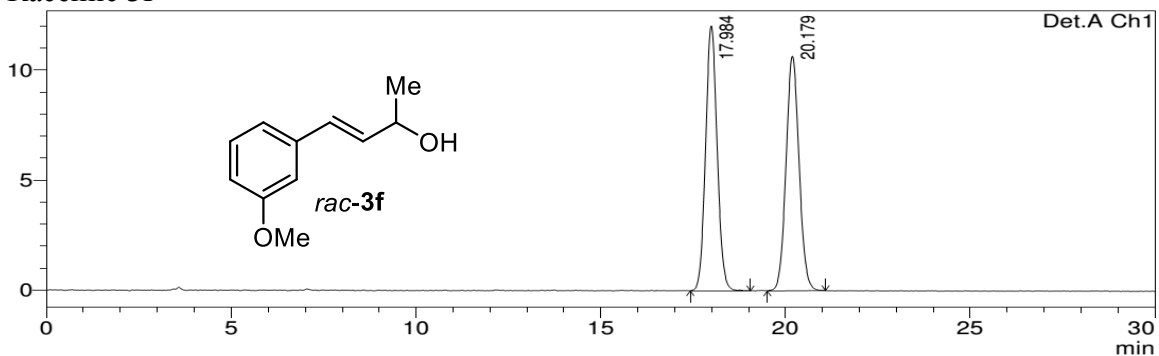

Detector A Ch1 254nm

| Peak# | Ret. Time | Area   | Height | Area %  | Height % |
|-------|-----------|--------|--------|---------|----------|
| 1     | 17.984    | 262479 | 12039  | 50.014  | 53.031   |
| 2     | 20.179    | 262328 | 10663  | 49.986  | 46.969   |
| Total |           | 524807 | 22702  | 100.000 | 100.000  |

Enantioenriched, (*S*)-**3f**, 95% ee (retention)

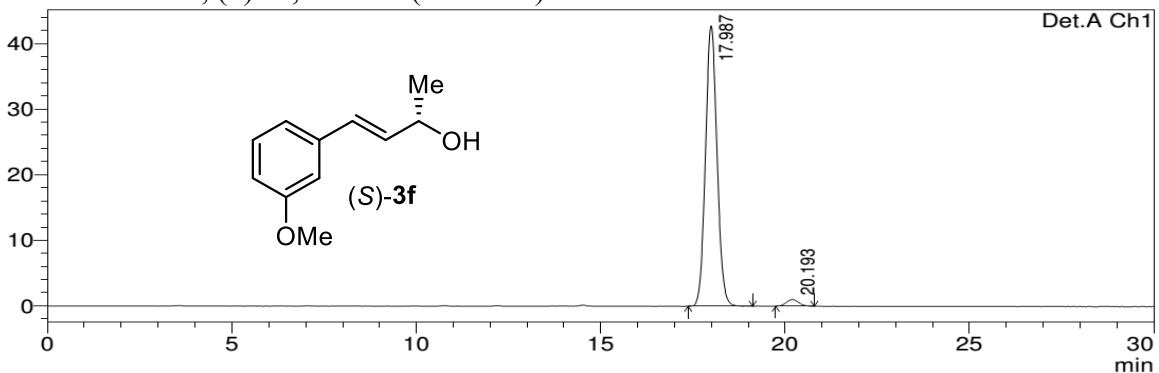

Detector A Ch1 254nm

| Peak# | Ret. Time | Area   | Height | Area %  | Height % |
|-------|-----------|--------|--------|---------|----------|
| 1     | 17.987    | 932391 | 42781  | 97.403  | 97.645   |
| 2     | 20.193    | 24861  | 1032   | 2.597   | 2.355    |
| Total |           | 957252 | 43813  | 100.000 | 100.000  |

Enantioenriched, (*R*)-**3f**, 90% ee (inversion)

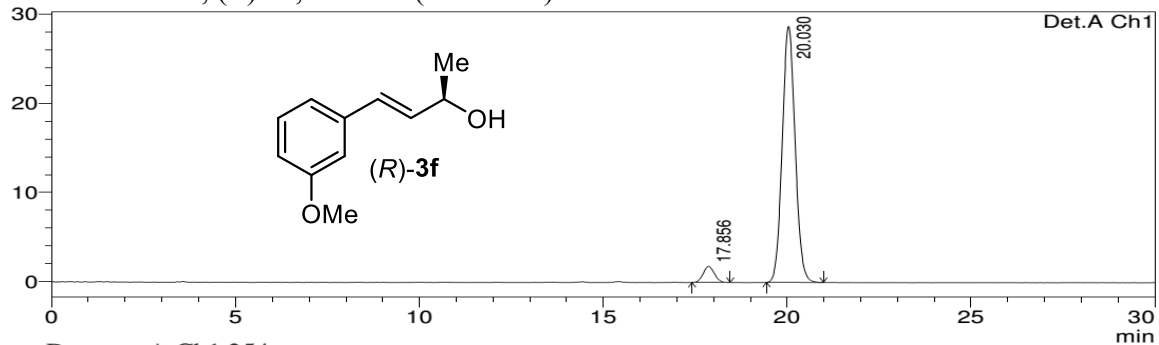

Detector A Ch1 254nm

| Peak# | Ret. Time | Area   | Height | Area %  | Height % |
|-------|-----------|--------|--------|---------|----------|
| 1     | 17.856    | 38100  | 1793   | 5.166   | 5.879    |
| 2     | 20.030    | 699408 | 28701  | 94.834  | 94.121   |
| Total |           | 737508 | 30494  | 100.000 | 100.000  |

Racemic **3g**  
mAU

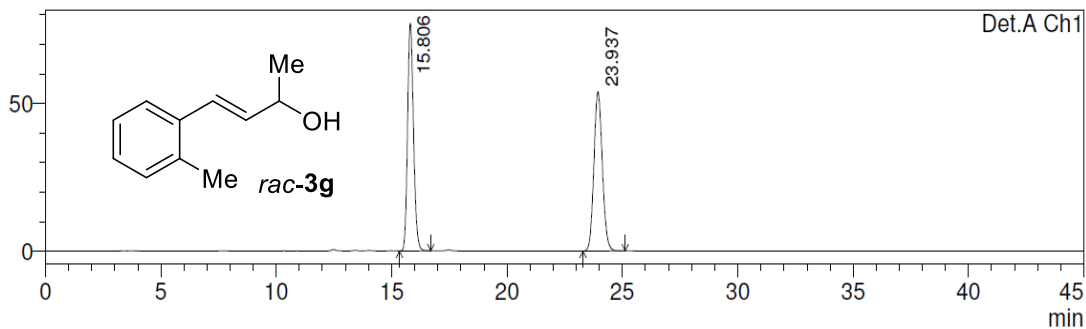

Detector A Ch1 254nm

| Peak# | Ret. Time | Area    | Height | Area %  | Height % |
|-------|-----------|---------|--------|---------|----------|
| 1     | 15.806    | 1374079 | 77208  | 49.958  | 58.847   |
| 2     | 23.937    | 1376411 | 53992  | 50.042  | 41.153   |
| Total |           | 2750490 | 131200 | 100.000 | 100.000  |

Enantioenriched, (*S*)-**3g**, 93% ee (retention)

mAU

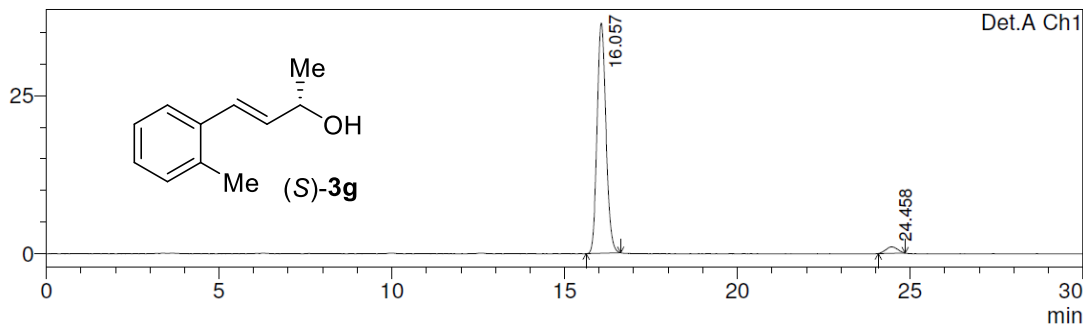

Detector A Ch1 254nm

| Peak# | Ret. Time | Area   | Height | Area %  | Height % |
|-------|-----------|--------|--------|---------|----------|
| 1     | 16.057    | 649583 | 36423  | 96.403  | 97.228   |
| 2     | 24.458    | 24239  | 1038   | 3.597   | 2.772    |
| Total |           | 673822 | 37461  | 100.000 | 100.000  |

Enantioenriched, (*R*)-**3g**, 84% ee (inversion)

mAU

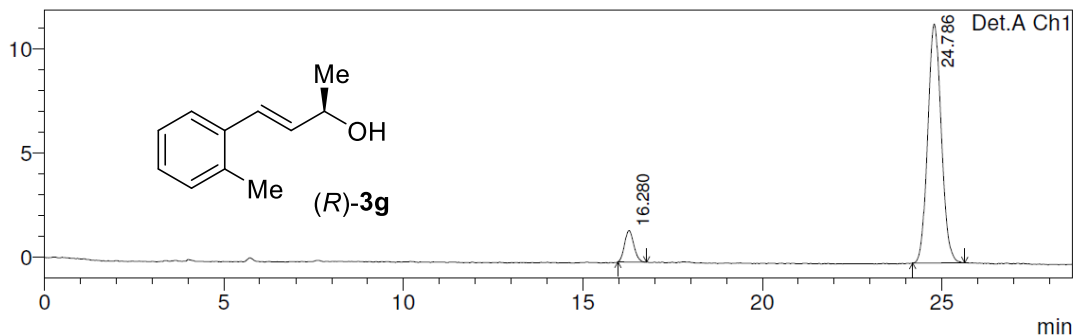

Detector A Ch1 254nm

| Peak# | Ret. Time | Area   | Height | Area %  | Height % |
|-------|-----------|--------|--------|---------|----------|
| 1     | 16.280    | 26876  | 1504   | 8.203   | 11.614   |
| 2     | 24.786    | 300781 | 11443  | 91.797  | 88.386   |
| Total |           | 327658 | 12947  | 100.000 | 100.000  |

### Racemic 3h

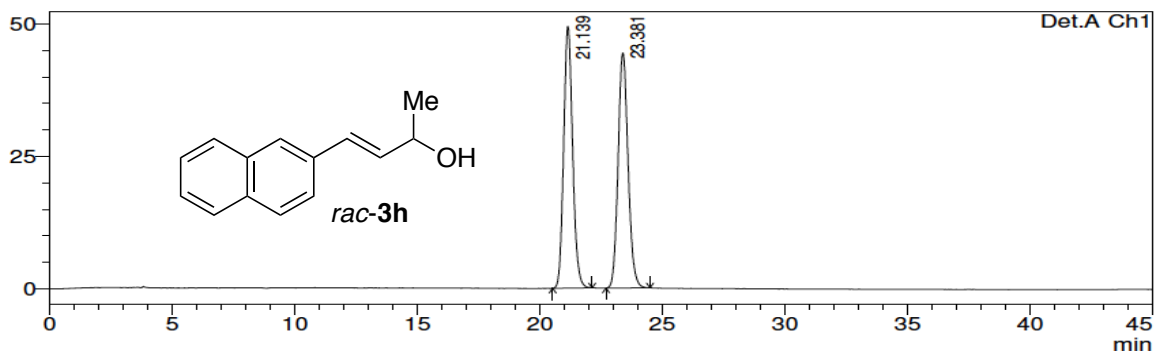

Detector A Ch1 254nm

| Peak# | Ret. Time | Area    | Height | Area %  | Height % |
|-------|-----------|---------|--------|---------|----------|
| 1     | 21.139    | 1257272 | 49382  | 49.980  | 52.669   |
| 2     | 23.381    | 1258302 | 44376  | 50.020  | 47.331   |
| Total |           | 2515575 | 93758  | 100.000 | 100.000  |

### Enantioenriched, (R)-3h, 90% ee (retention)

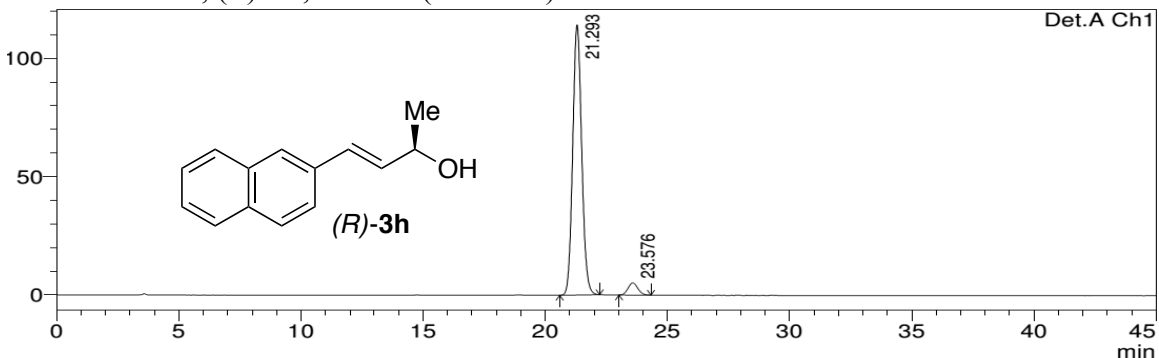

Detector A Ch1 254nm

| Peak# | Ret. Time | Area    | Height | Area %  | Height % |
|-------|-----------|---------|--------|---------|----------|
| 1     | 21.293    | 2921971 | 114195 | 95.273  | 95.665   |
| 2     | 23.576    | 144987  | 5174   | 4.727   | 4.335    |
| Total |           | 3066958 | 119369 | 100.000 | 100.000  |

### Enantioenriched, (S)-3h, 89% ee (inversion)

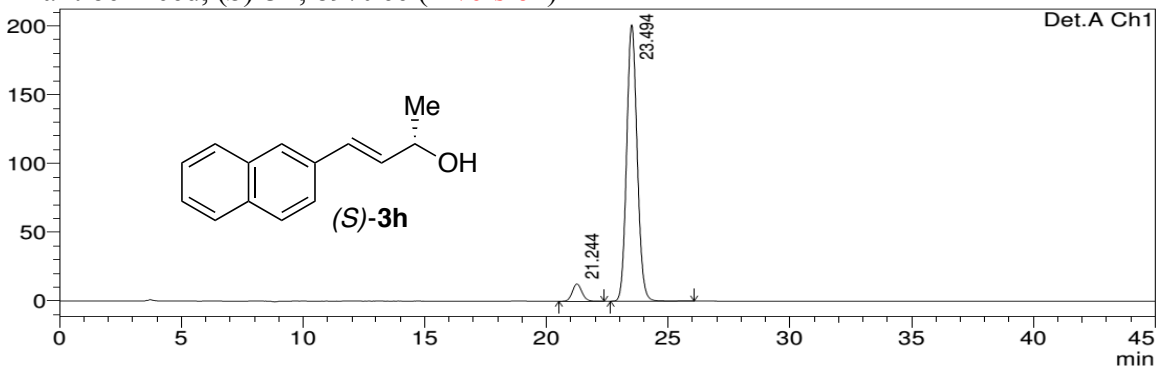

Detector A Ch1 254nm

| Peak# | Ret. Time | Area    | Height | Area %  | Height % |
|-------|-----------|---------|--------|---------|----------|
| 1     | 21.244    | 345469  | 12569  | 5.408   | 5.885    |
| 2     | 23.494    | 6042259 | 201018 | 94.592  | 94.115   |
| Total |           | 6387727 | 213587 | 100.000 | 100.000  |

Racemic **3i**

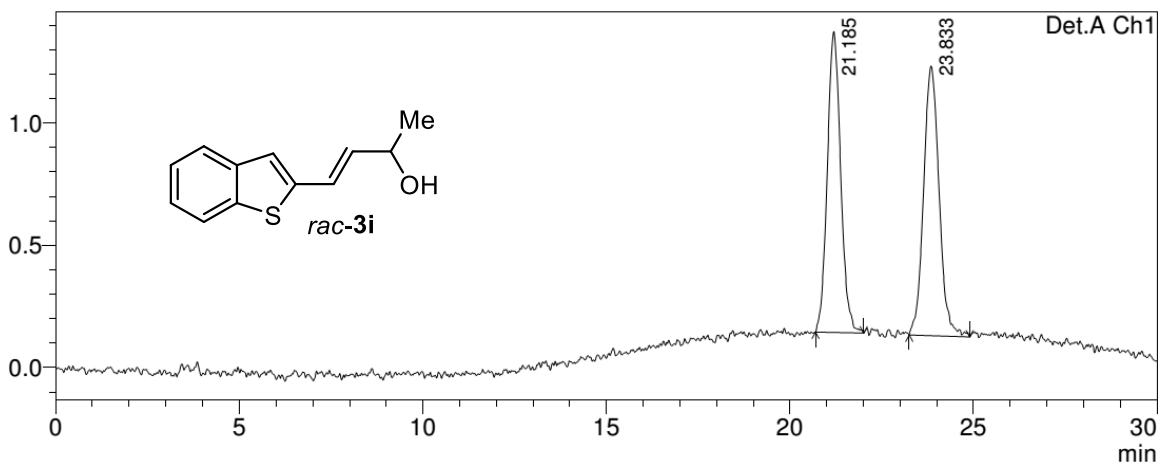

Detector A Ch1 254nm

| Peak# | Ret. Time | Area  | Height | Area %  | Height % |
|-------|-----------|-------|--------|---------|----------|
| 1     | 21.185    | 31140 | 1230   | 49.102  | 52.754   |
| 2     | 23.833    | 32280 | 1101   | 50.898  | 47.246   |
| Total |           | 63420 | 2331   | 100.000 | 100.000  |

Enantioenriched, (*S*)-**3i**, 68% ee (retention)

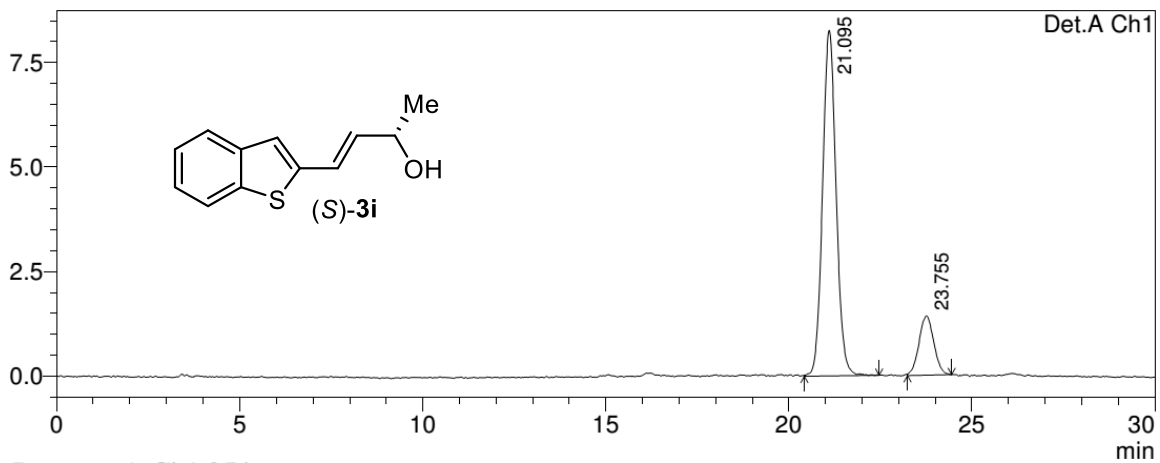

Detector A Ch1 254nm

| Peak# | Ret. Time | Area   | Height | Area %  | Height % |
|-------|-----------|--------|--------|---------|----------|
| 1     | 21.095    | 211809 | 8267   | 84.127  | 85.353   |
| 2     | 23.755    | 39964  | 1419   | 15.873  | 14.647   |
| Total |           | 251774 | 9686   | 100.000 | 100.000  |

Racemic **3j**

mAU

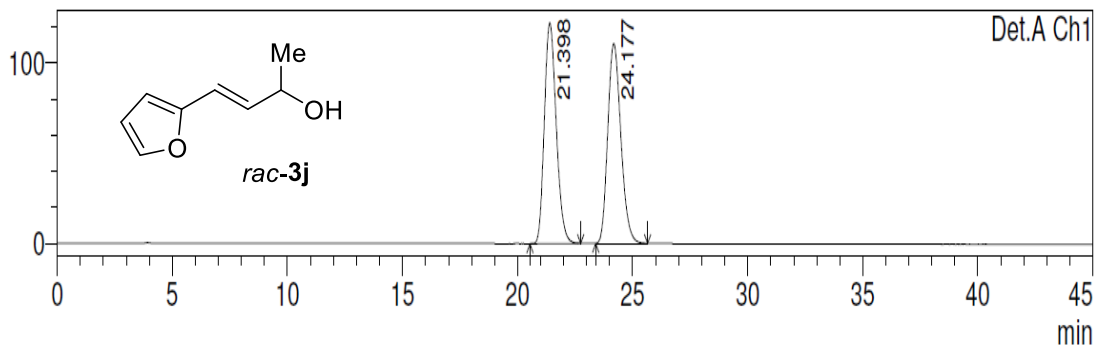

Detector A Ch1 254nm

| Peak# | Ret. Time | Area    | Height | Area %  | Height % |
|-------|-----------|---------|--------|---------|----------|
| 1     | 21.398    | 4396742 | 122528 | 50.015  | 52.487   |
| 2     | 24.177    | 4394091 | 110918 | 49.985  | 47.513   |
| Total |           | 8790833 | 233446 | 100.000 | 100.000  |

Enantioenriched, (*S*)-**3j**, 92% ee (retention)

mAU

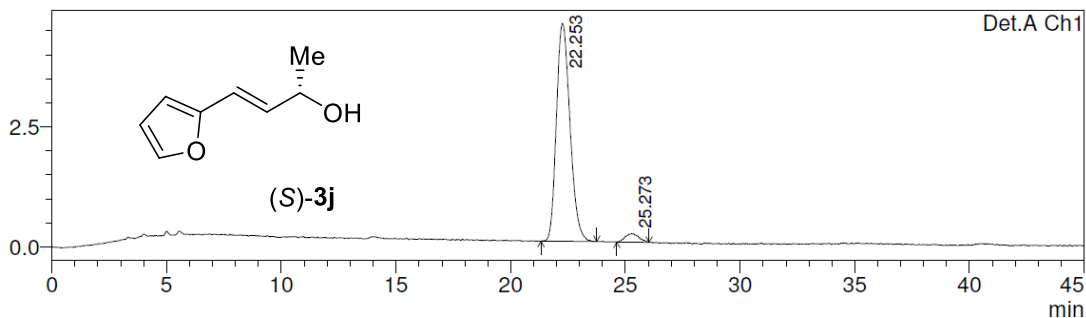

Detector A Ch1 254nm

| Peak# | Ret. Time | Area   | Height | Area %  | Height % |
|-------|-----------|--------|--------|---------|----------|
| 1     | 22.253    | 186677 | 4534   | 96.144  | 96.172   |
| 2     | 25.273    | 7487   | 180    | 3.856   | 3.828    |
| Total |           | 194163 | 4715   | 100.000 | 100.000  |

Enantioenriched, (*R*)-**3j**, 77% ee (inversion)

mAU

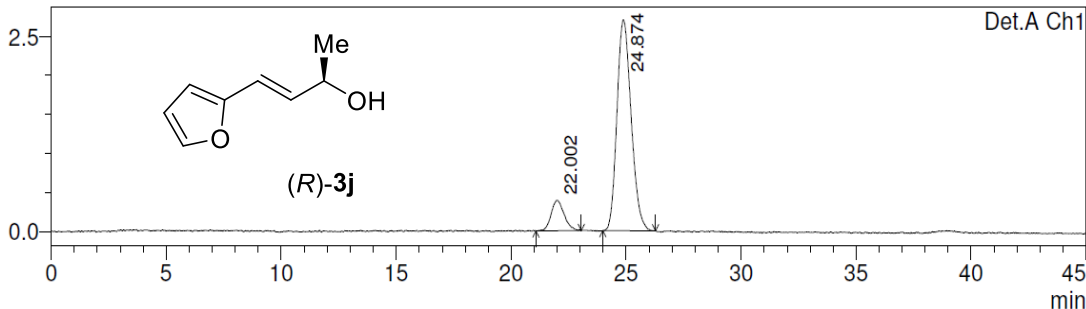

Detector A Ch1 254nm

| Peak# | Ret. Time | Area   | Height | Area %  | Height % |
|-------|-----------|--------|--------|---------|----------|
| 1     | 22.002    | 15326  | 391    | 11.646  | 12.614   |
| 2     | 24.874    | 116271 | 2708   | 88.354  | 87.386   |
| Total |           | 131598 | 3098   | 100.000 | 100.000  |



Racemic **3k**

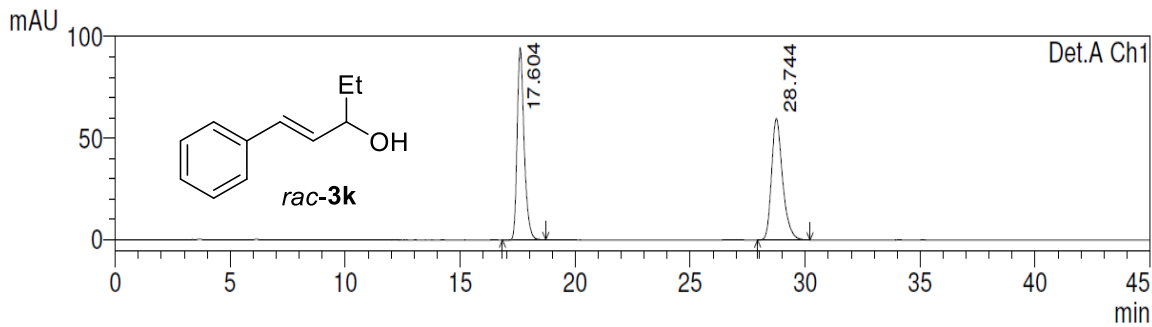

Detector A Ch1 254nm

| Peak# | Ret. Time | Area    | Height | Area %  | Height % |
|-------|-----------|---------|--------|---------|----------|
| 1     | 17.604    | 1996140 | 94709  | 50.003  | 61.323   |
| 2     | 28.744    | 1995903 | 59734  | 49.997  | 38.677   |
| Total |           | 3992043 | 154443 | 100.000 | 100.000  |

Enantioenriched, (*S*)-**3k**, 98% ee (retention)

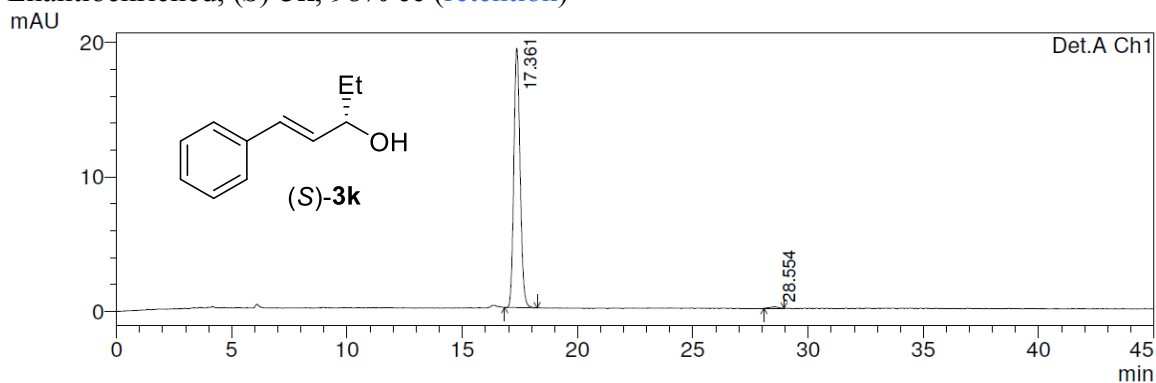

Detector A Ch1 254nm

| Peak# | Ret. Time | Area   | Height | Area %  | Height % |
|-------|-----------|--------|--------|---------|----------|
| 1     | 17.361    | 364256 | 19286  | 99.213  | 99.411   |
| 2     | 28.554    | 2890   | 114    | 0.787   | 0.589    |
| Total |           | 367147 | 19400  | 100.000 | 100.000  |

Enantioenriched, (*R*)-**3k**, 91% ee (inversion)

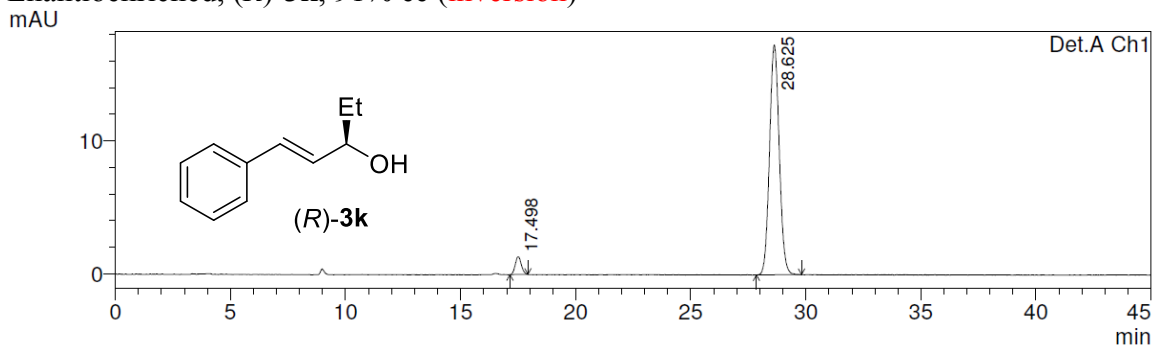

Detector A Ch1 254nm

| Peak# | Ret. Time | Area   | Height | Area %  | Height % |
|-------|-----------|--------|--------|---------|----------|
| 1     | 17.498    | 24845  | 1336   | 4.684   | 7.185    |
| 2     | 28.625    | 505608 | 17258  | 95.316  | 92.815   |
| Total |           | 530453 | 18594  | 100.000 | 100.000  |

### Racemic **3I**

mAU

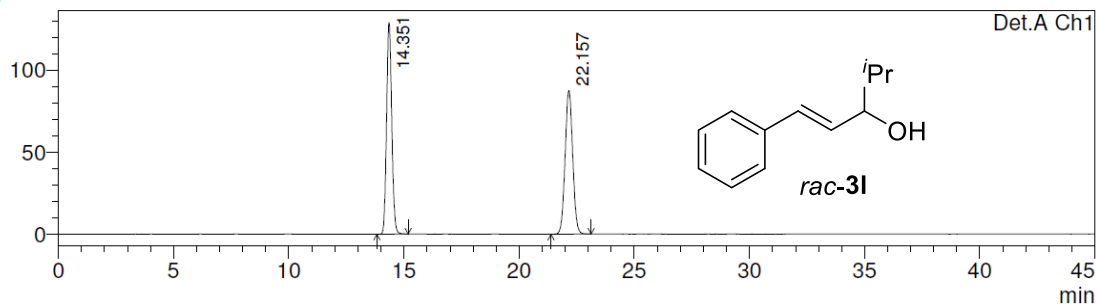

Detector A Ch1 254nm

| Peak# | Ret. Time | Area    | Height | Area %  | Height % |
|-------|-----------|---------|--------|---------|----------|
| 1     | 14.351    | 2006467 | 129008 | 49.967  | 59.598   |
| 2     | 22.157    | 2009095 | 87455  | 50.033  | 40.402   |
| Total |           | 4015562 | 216463 | 100.000 | 100.000  |

### Enantioenriched, (*S*)-**3I**, 98% ee (retention)

mAU

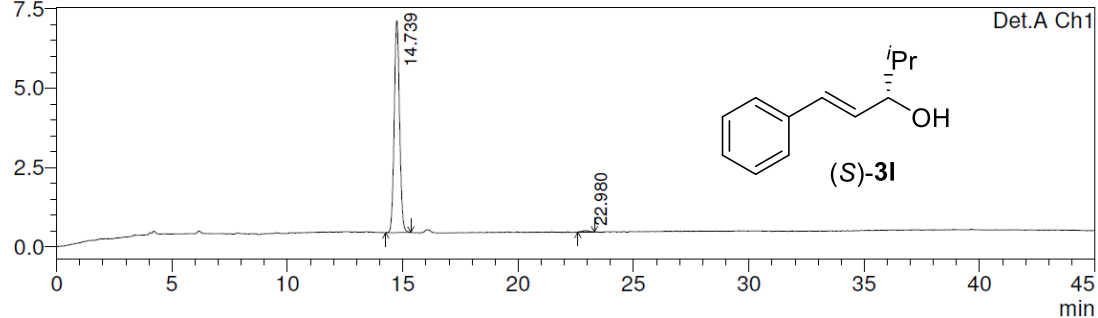

Detector A Ch1 254nm

| Peak# | Ret. Time | Area   | Height | Area %  | Height % |
|-------|-----------|--------|--------|---------|----------|
| 1     | 14.739    | 107690 | 6684   | 99.149  | 99.337   |
| 2     | 22.980    | 925    | 45     | 0.851   | 0.663    |
| Total |           | 108615 | 6728   | 100.000 | 100.000  |

### Enantioenriched, (*R*)-**3I**, 80% ee (inversion)

mAU

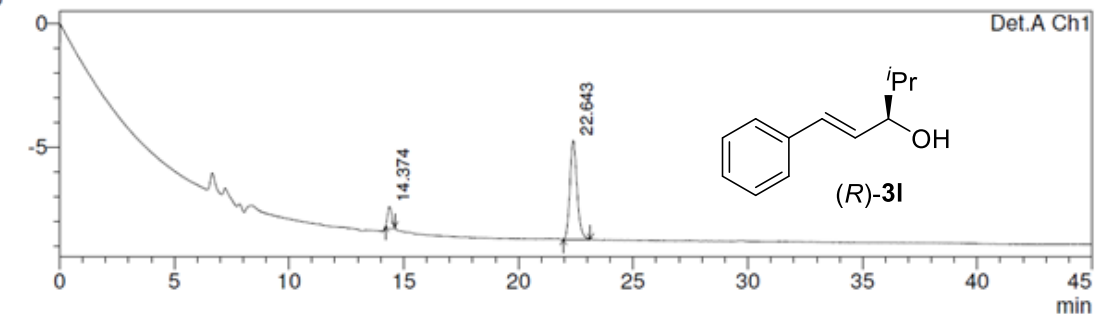

Detector A Ch1 220nm

| Peak# | Ret. Time | Area  | Height | Area %  | Height % |
|-------|-----------|-------|--------|---------|----------|
| 1     | 14.374    | 10081 | 817    | 10.473  | 17.007   |
| 2     | 22.643    | 86180 | 3985   | 89.527  | 82.993   |
| Total |           | 96262 | 4801   | 100.000 | 100.000  |

### Racemic **3m**

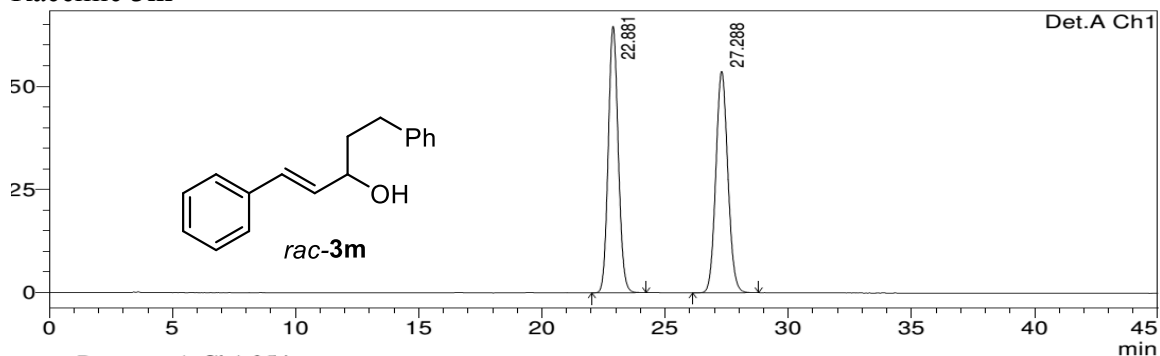

Detector A Ch1 254nm

| Peak# | Ret. Time | Area    | Height | Area %  | Height % |
|-------|-----------|---------|--------|---------|----------|
| 1     | 22.881    | 1824790 | 64649  | 49.988  | 54.622   |
| 2     | 27.288    | 1825632 | 53708  | 50.012  | 45.378   |
| Total |           | 3650422 | 118357 | 100.000 | 100.000  |

### Enantioenriched (*S*)-**3m**, 96% ee (retention)

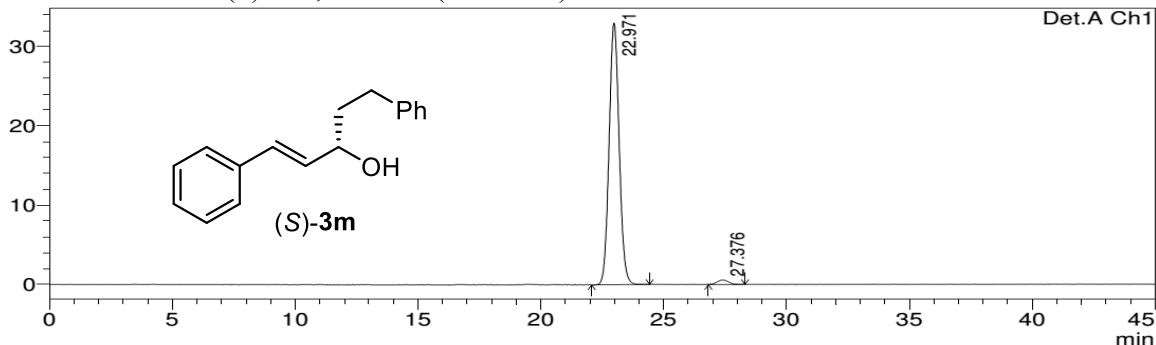

Detector A Ch1 254nm

| Peak# | Ret. Time | Area   | Height | Area %  | Height % |
|-------|-----------|--------|--------|---------|----------|
| 1     | 22.971    | 940092 | 33007  | 97.931  | 98.281   |
| 2     | 27.376    | 19865  | 577    | 2.069   | 1.719    |
| Total |           | 959957 | 33584  | 100.000 | 100.000  |

### Enantioenriched (*R*)-**3m**, 92% ee (inversion)

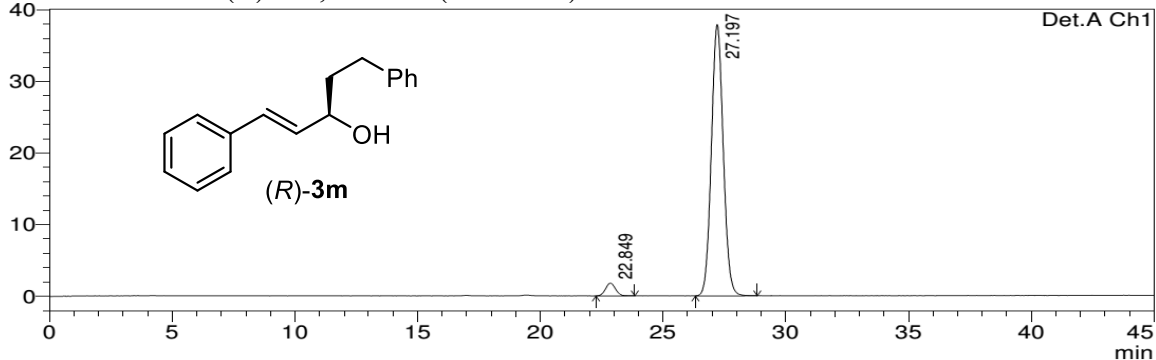

Detector A Ch1 254nm

| Peak# | Ret. Time | Area    | Height | Area %  | Height % |
|-------|-----------|---------|--------|---------|----------|
| 1     | 22.849    | 51578   | 1799   | 3.882   | 4.532    |
| 2     | 27.197    | 1277040 | 37886  | 96.118  | 95.468   |
| Total |           | 1328618 | 39684  | 100.000 | 100.000  |

Racemic **3n**

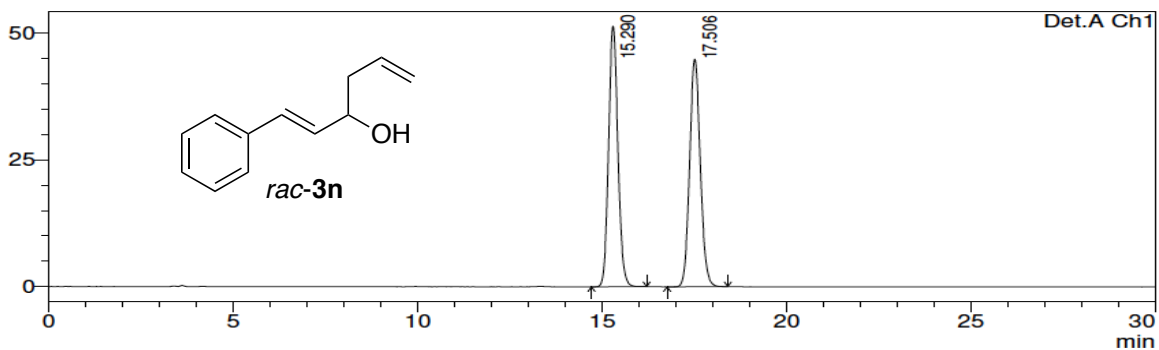

Detector A Ch1 254nm

| Peak# | Ret. Time | Area    | Height | Area %  | Height % |
|-------|-----------|---------|--------|---------|----------|
| 1     | 15.290    | 903612  | 51435  | 49.957  | 53.361   |
| 2     | 17.506    | 905164  | 44955  | 50.043  | 46.639   |
| Total |           | 1808777 | 96391  | 100.000 | 100.000  |

Enantioenriched (*S*)-**3n**, 79% ee (retention)

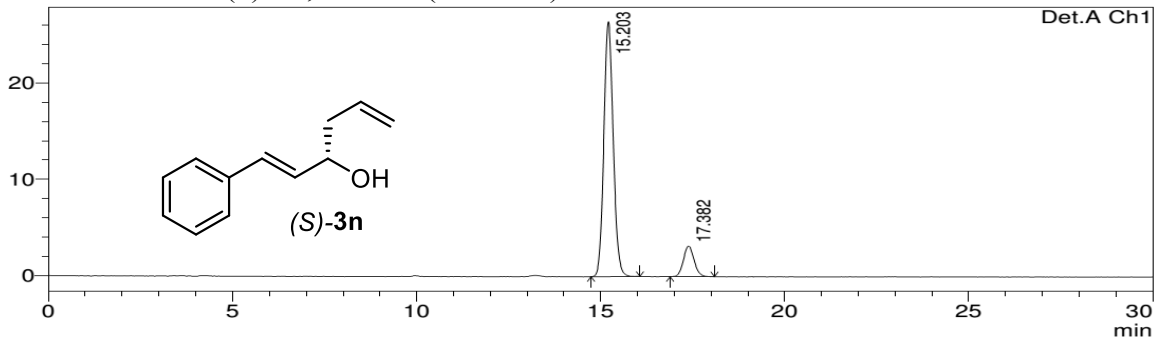

Detector A Ch1 254nm

| Peak# | Ret. Time | Area   | Height | Area %  | Height % |
|-------|-----------|--------|--------|---------|----------|
| 1     | 15.203    | 469152 | 26467  | 87.868  | 89.267   |
| 2     | 17.382    | 64776  | 3182   | 12.132  | 10.733   |
| Total |           | 533929 | 29649  | 100.000 | 100.000  |

Enantioenriched (*R*)-**3n**, 89% ee (inversion)

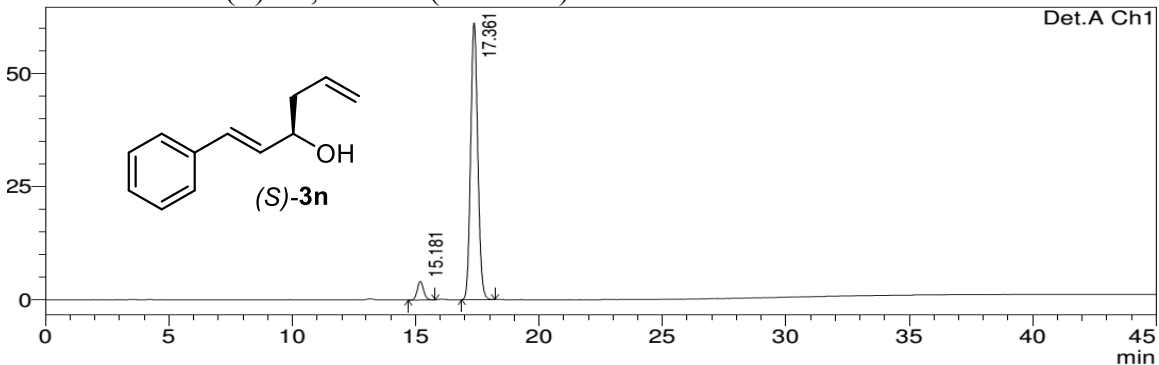

Detector A Ch1 254nm

| Peak# | Ret. Time | Area    | Height | Area %  | Height % |
|-------|-----------|---------|--------|---------|----------|
| 1     | 15.181    | 72151   | 4092   | 5.534   | 6.271    |
| 2     | 17.361    | 1231557 | 61158  | 94.466  | 93.729   |
| Total |           | 1303709 | 65251  | 100.000 | 100.000  |

**Racemic 3o**

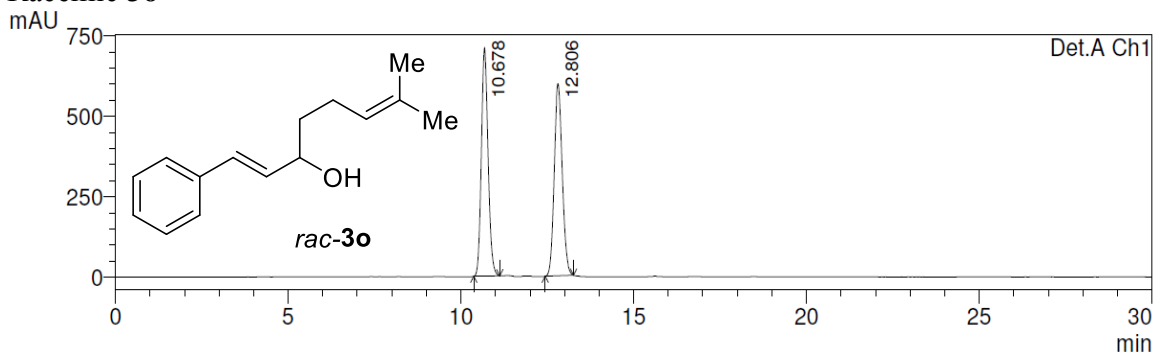

Detector A Ch1 254nm

| Peak# | Ret. Time | Area     | Height  | Area %  | Height % |
|-------|-----------|----------|---------|---------|----------|
| 1     | 10.678    | 9706710  | 711675  | 50.112  | 54.327   |
| 2     | 12.806    | 9663496  | 598320  | 49.888  | 45.673   |
| Total |           | 19370206 | 1309995 | 100.000 | 100.000  |

**Enantioenriched, (S)-3o, 76% ee (retention)**

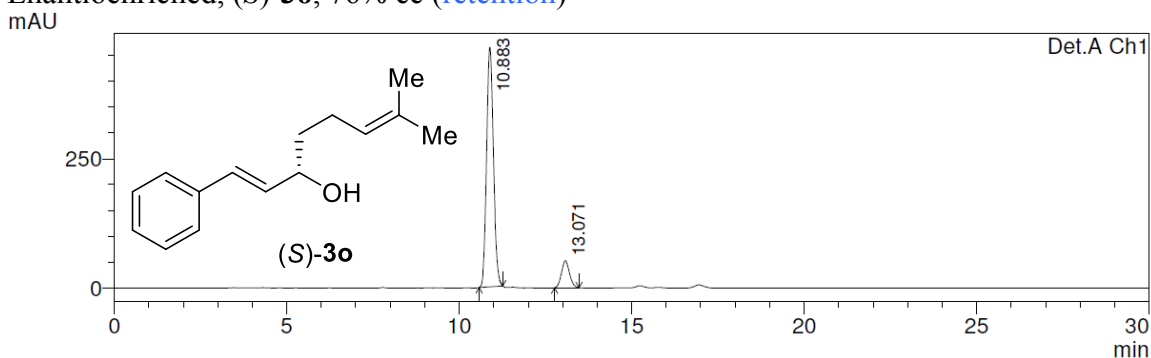

Detector A Ch1 254nm

| Peak# | Ret. Time | Area    | Height | Area %  | Height % |
|-------|-----------|---------|--------|---------|----------|
| 1     | 10.883    | 6364084 | 463297 | 88.310  | 89.871   |
| 2     | 13.071    | 842476  | 52218  | 11.690  | 10.129   |
| Total |           | 7206560 | 515515 | 100.000 | 100.000  |

**Enantioenriched, (R)-3o, 70% ee (inversion)**

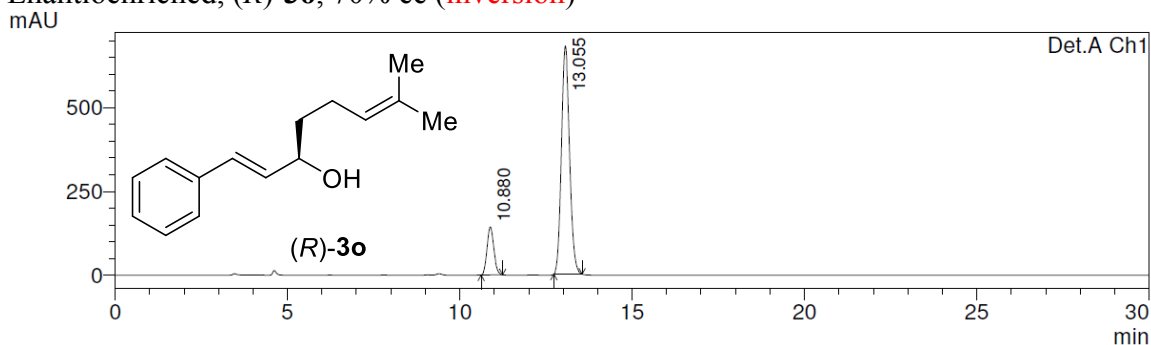

Detector A Ch1 254nm

| Peak# | Ret. Time | Area     | Height | Area %  | Height % |
|-------|-----------|----------|--------|---------|----------|
| 1     | 10.880    | 1939073  | 142960 | 14.760  | 17.358   |
| 2     | 13.055    | 11198627 | 680624 | 85.240  | 82.642   |
| Total |           | 13137700 | 823584 | 100.000 | 100.000  |

Racemic **8p**

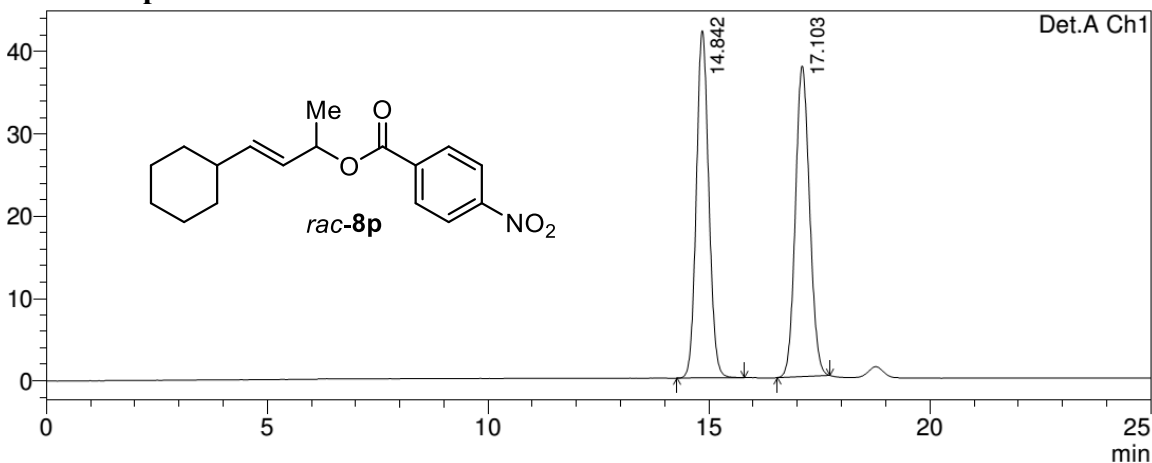

Detector A Ch1 254nm

| Peak# | Ret. Time | Area    | Height | Area %  | Height % |
|-------|-----------|---------|--------|---------|----------|
| 1     | 14.842    | 826154  | 42198  | 49.438  | 52.792   |
| 2     | 17.103    | 844935  | 37734  | 50.562  | 47.208   |
| Total |           | 1671089 | 79932  | 100.000 | 100.000  |

Enantioenriched, (*S*)-**8p**, 92% ee (retention)

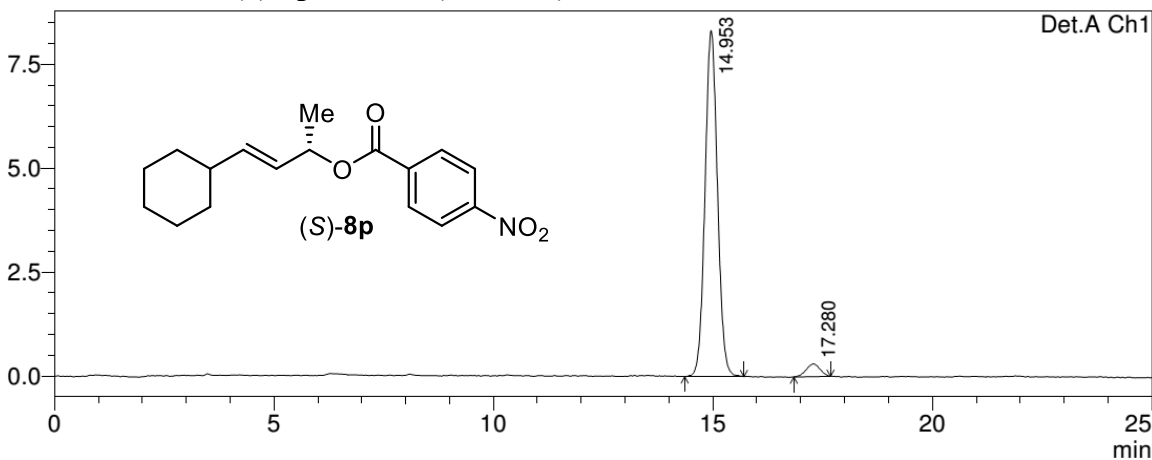

Detector A Ch1 254nm

| Peak# | Ret. Time | Area   | Height | Area %  | Height % |
|-------|-----------|--------|--------|---------|----------|
| 1     | 14.953    | 164549 | 8329   | 96.014  | 96.389   |
| 2     | 17.280    | 6831   | 312    | 3.986   | 3.611    |
| Total |           | 171381 | 8642   | 100.000 | 100.000  |

### Racemic 3q

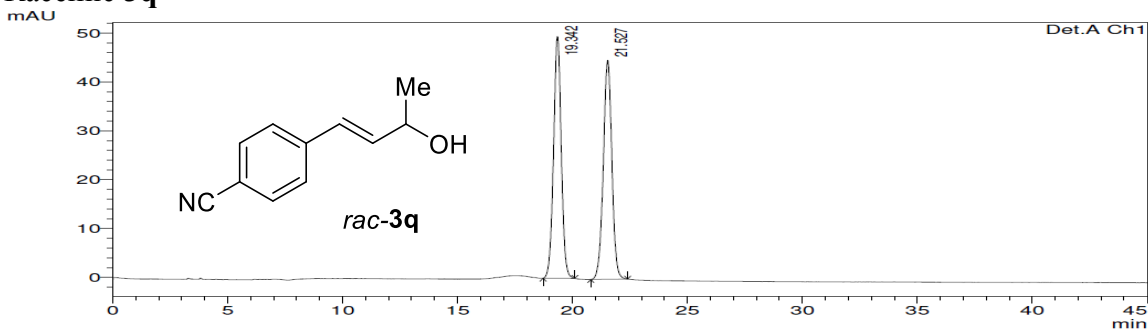

Detector A Ch1 254nm

| Peak# | Ret. Time | Area    | Height | Area %  | Height % |
|-------|-----------|---------|--------|---------|----------|
| 1     | 19.342    | 1155111 | 49477  | 49.791  | 52.459   |
| 2     | 21.527    | 1164813 | 44838  | 50.209  | 47.541   |
| Total |           | 2319925 | 94314  | 100.000 | 100.000  |

### Enantioenriched, (S)-3q, 81% ee (retention)

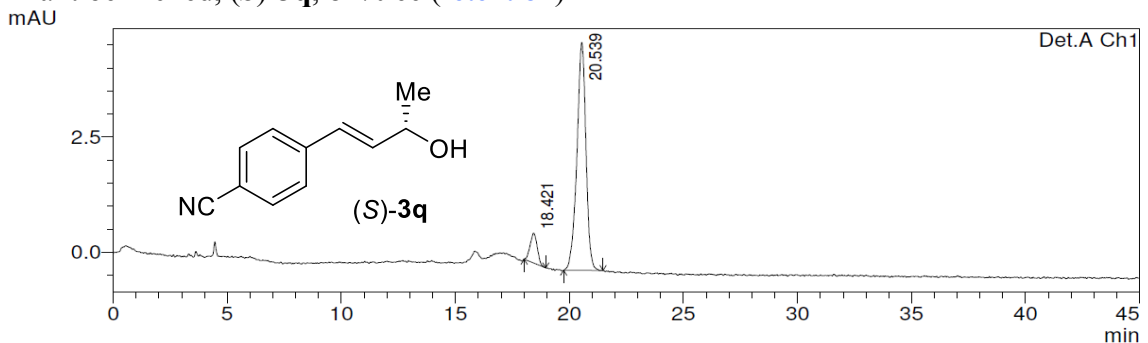

Detector A Ch1 254nm

| Peak# | Ret. Time | Area   | Height | Area %  | Height % |
|-------|-----------|--------|--------|---------|----------|
| 1     | 18.421    | 14121  | 651    | 9.377   | 11.620   |
| 2     | 20.539    | 136481 | 4953   | 90.623  | 88.380   |
| Total |           | 150602 | 5604   | 100.000 | 100.000  |

### Enantioenriched, (R)-3q, 77% ee (inversion)

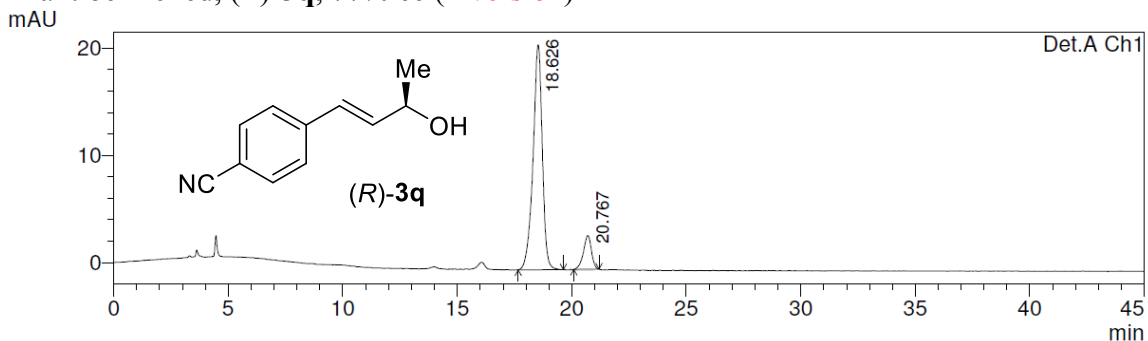

Detector A Ch1 254nm

| Peak# | Ret. Time | Area   | Height | Area %  | Height % |
|-------|-----------|--------|--------|---------|----------|
| 1     | 18.626    | 590432 | 20989  | 88.552  | 86.952   |
| 2     | 20.767    | 76334  | 3150   | 11.448  | 13.048   |
| Total |           | 666766 | 24139  | 100.000 | 100.000  |

Racemic **3r**

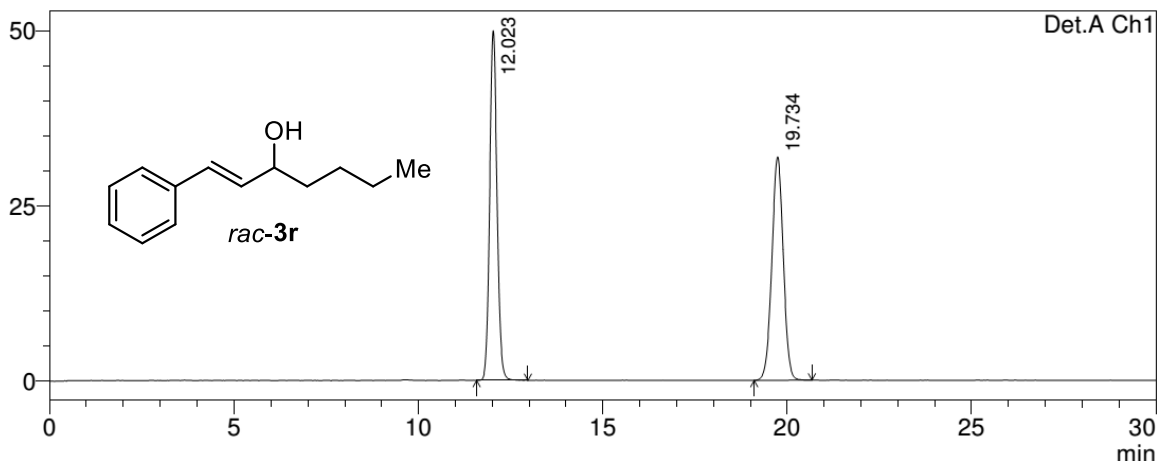

Detector A Ch1 254nm

| Peak# | Ret. Time | Area    | Height | Area %  | Height % |
|-------|-----------|---------|--------|---------|----------|
| 1     | 12.023    | 691681  | 49991  | 49.958  | 61.014   |
| 2     | 19.734    | 692858  | 31943  | 50.042  | 38.986   |
| Total |           | 1384539 | 81934  | 100.000 | 100.000  |

Enantioenriched, (*R*)-**3r**, 70% ee (**inversion**)

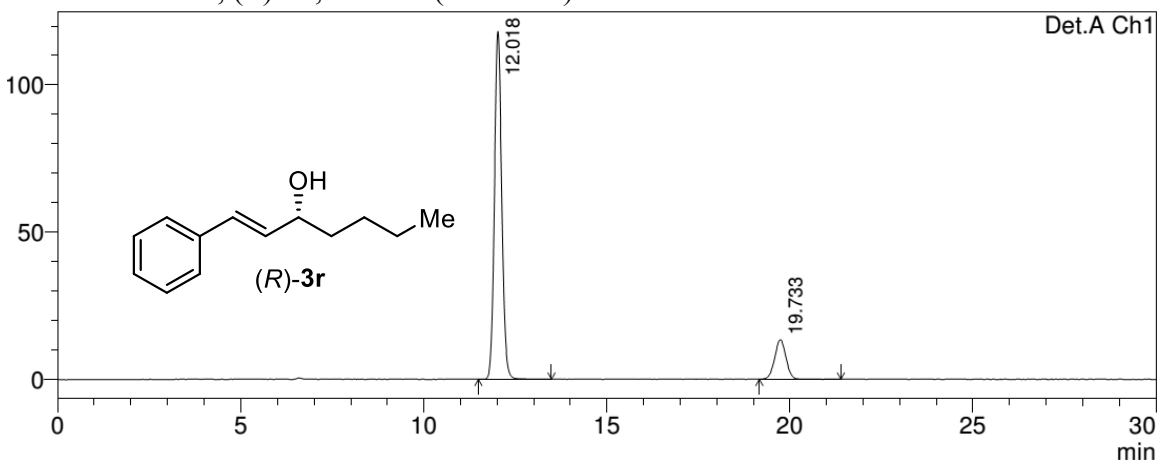

Detector A Ch1 254nm

| Peak# | Ret. Time | Area    | Height | Area %  | Height % |
|-------|-----------|---------|--------|---------|----------|
| 1     | 12.018    | 1639195 | 118061 | 84.974  | 89.781   |
| 2     | 19.733    | 289866  | 13438  | 15.026  | 10.219   |
| Total |           | 1929061 | 131499 | 100.000 | 100.000  |



Racemic **1b**

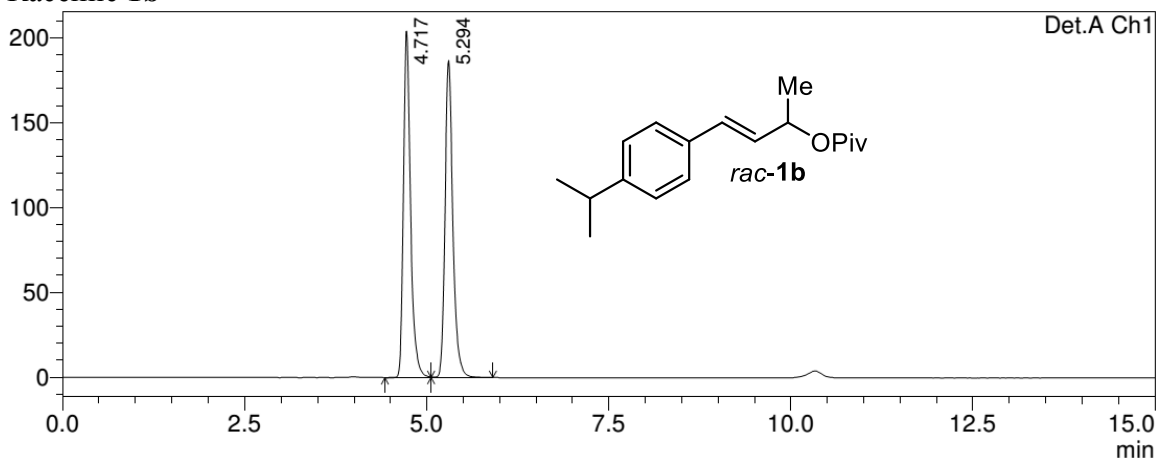

Detector A Ch1 254nm

| Peak# | Ret. Time | Area    | Height | Area %  | Height % |
|-------|-----------|---------|--------|---------|----------|
| 1     | 4.717     | 1392193 | 203778 | 49.938  | 52.175   |
| 2     | 5.294     | 1395650 | 186791 | 50.062  | 47.825   |
| Total |           | 2787843 | 390568 | 100.000 | 100.000  |

Enantioenriched (*S*)-**1b**, 92% ee

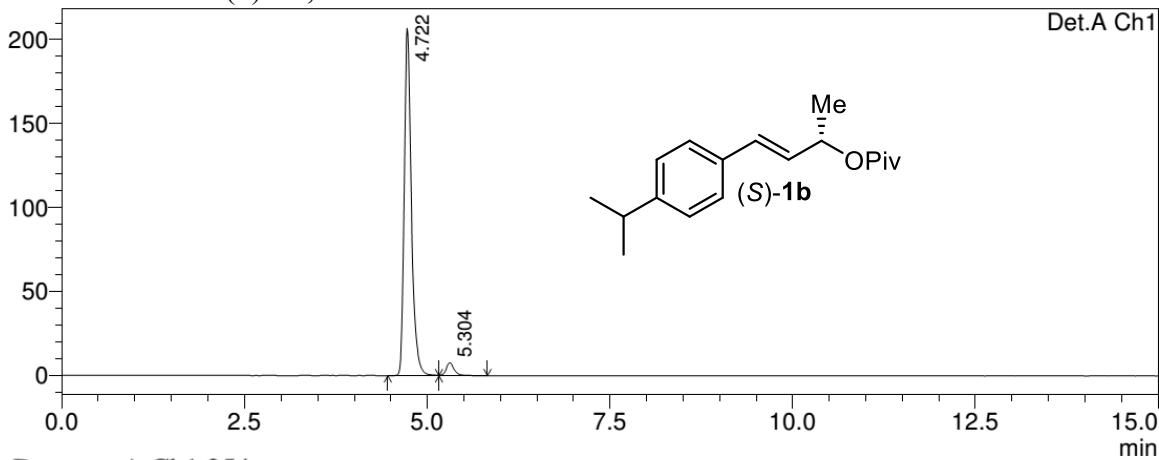

Detector A Ch1 254nm

| Peak# | Ret. Time | Area    | Height | Area %  | Height % |
|-------|-----------|---------|--------|---------|----------|
| 1     | 4.722     | 1414357 | 206984 | 96.025  | 96.420   |
| 2     | 5.304     | 58546   | 7686   | 3.975   | 3.580    |
| Total |           | 1472902 | 214669 | 100.000 | 100.000  |

Racemic **1c**

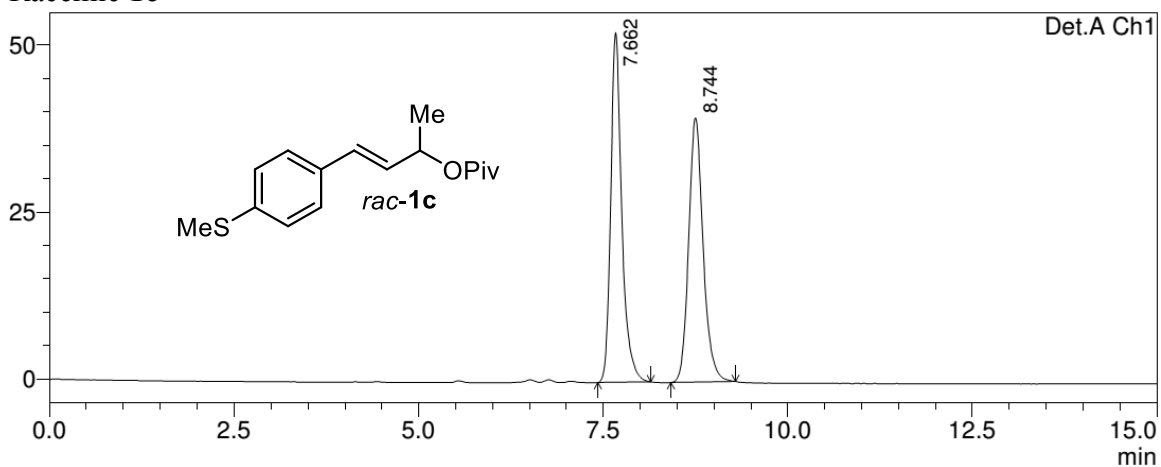

Detector A Ch1 254nm

| Peak# | Ret. Time | Area    | Height | Area %  | Height % |
|-------|-----------|---------|--------|---------|----------|
| 1     | 7.662     | 545452  | 52377  | 50.258  | 56.929   |
| 2     | 8.744     | 539849  | 39627  | 49.742  | 43.071   |
| Total |           | 1085301 | 92004  | 100.000 | 100.000  |

Enantioenriched (*R*)-**1c**, 93% ee

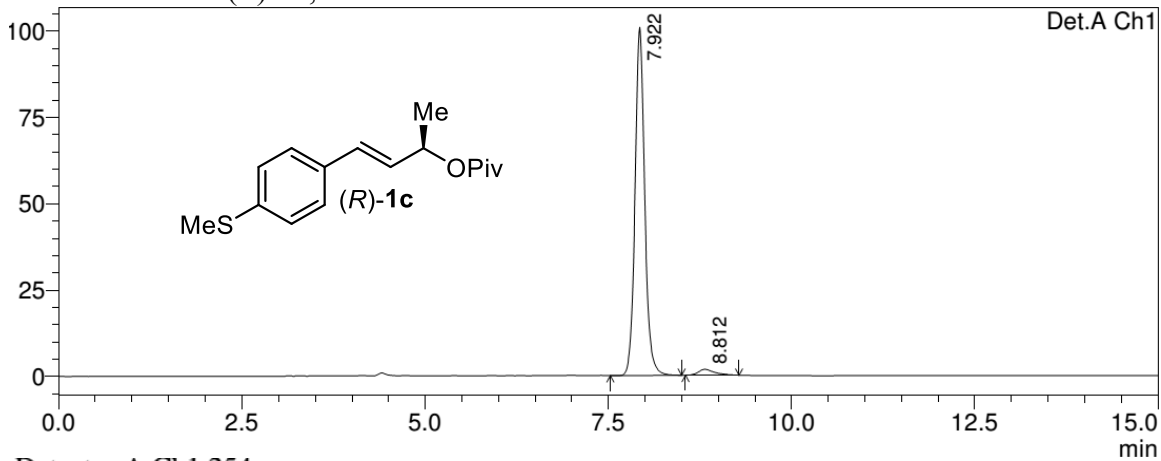

Detector A Ch1 254nm

| Peak# | Ret. Time | Area   | Height | Area %  | Height % |
|-------|-----------|--------|--------|---------|----------|
| 1     | 7.922     | 929334 | 100908 | 97.154  | 98.318   |
| 2     | 8.812     | 27225  | 1726   | 2.846   | 1.682    |
| Total |           | 956559 | 102634 | 100.000 | 100.000  |

Racemic **1f**

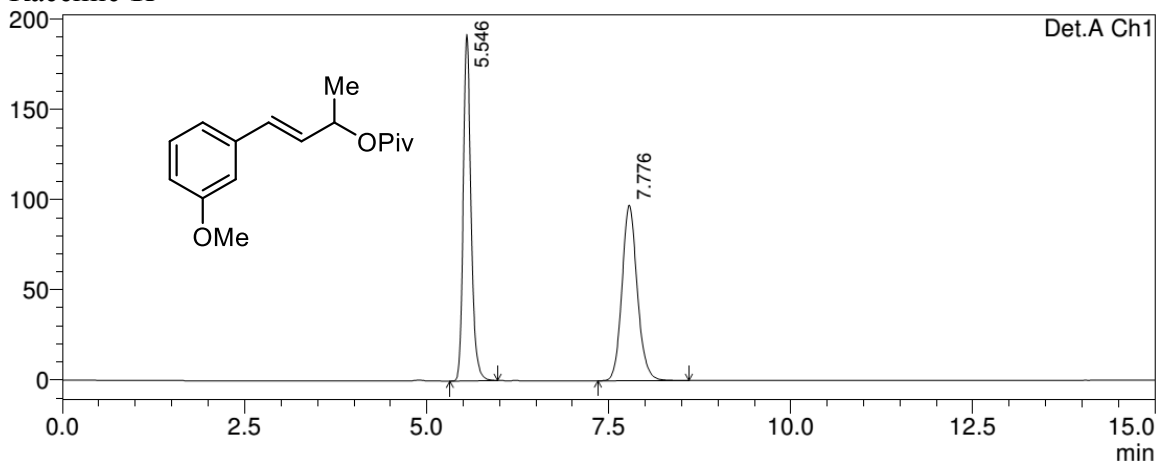

Detector A Ch1 254nm

| Peak# | Ret. Time | Area    | Height | Area %  | Height % |
|-------|-----------|---------|--------|---------|----------|
| 1     | 5.546     | 1421132 | 192117 | 49.933  | 66.385   |
| 2     | 7.776     | 1424963 | 97280  | 50.067  | 33.615   |
| Total |           | 2846095 | 289397 | 100.000 | 100.000  |

Enantioenriched (*S*)-**1f**, 98% ee

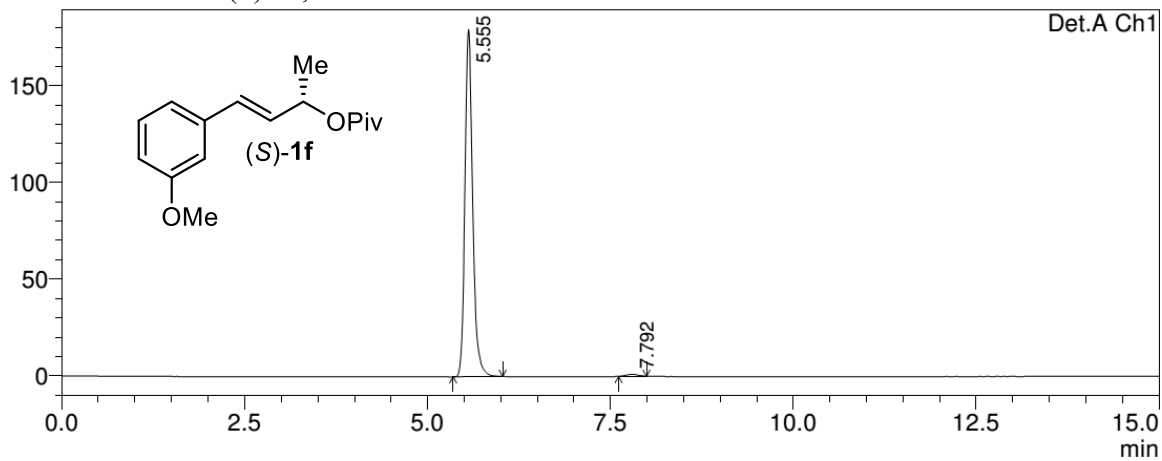

Detector A Ch1 254nm

| Peak# | Ret. Time | Area    | Height | Area %  | Height % |
|-------|-----------|---------|--------|---------|----------|
| 1     | 5.555     | 1321114 | 179619 | 99.127  | 99.463   |
| 2     | 7.792     | 11641   | 971    | 0.873   | 0.537    |
| Total |           | 1332754 | 180589 | 100.000 | 100.000  |

### Racemic **1g**

mAU

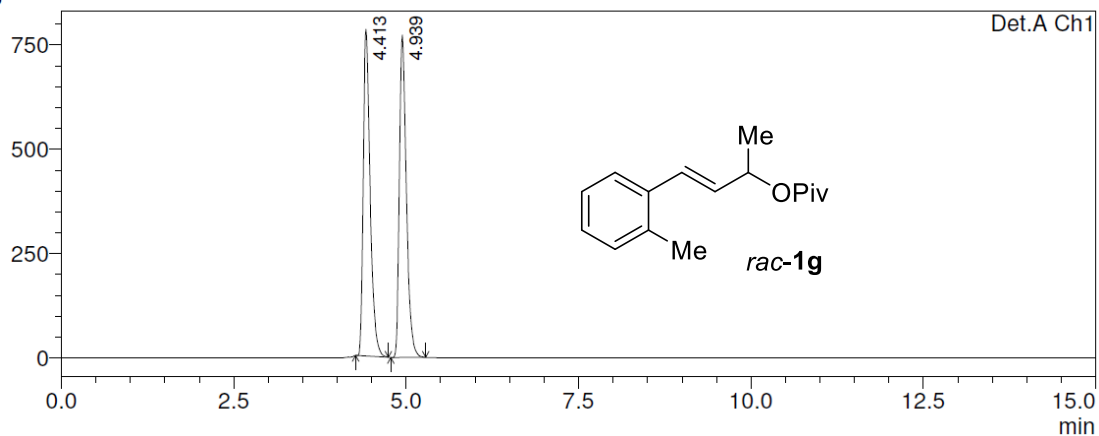

Detector A Ch1 254nm

| Peak# | Ret. Time | Area     | Height  | Area %  | Height % |
|-------|-----------|----------|---------|---------|----------|
| 1     | 4.413     | 5415837  | 782608  | 49.859  | 50.324   |
| 2     | 4.939     | 5446528  | 772532  | 50.141  | 49.676   |
| Total |           | 10862365 | 1555140 | 100.000 | 100.000  |

### Enantioenriched (*S*)-**1g**, 94% ee

mAU

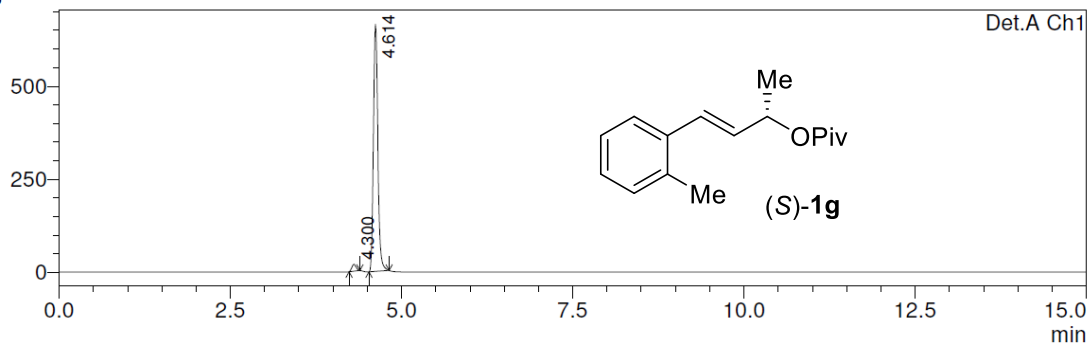

Detector A Ch1 254nm

| Peak# | Ret. Time | Area    | Height | Area %  | Height % |
|-------|-----------|---------|--------|---------|----------|
| 1     | 4.300     | 83718   | 18747  | 2.715   | 2.745    |
| 2     | 4.614     | 2999625 | 664222 | 97.285  | 97.255   |
| Total |           | 3083343 | 682969 | 100.000 | 100.000  |

Racemic **1i**

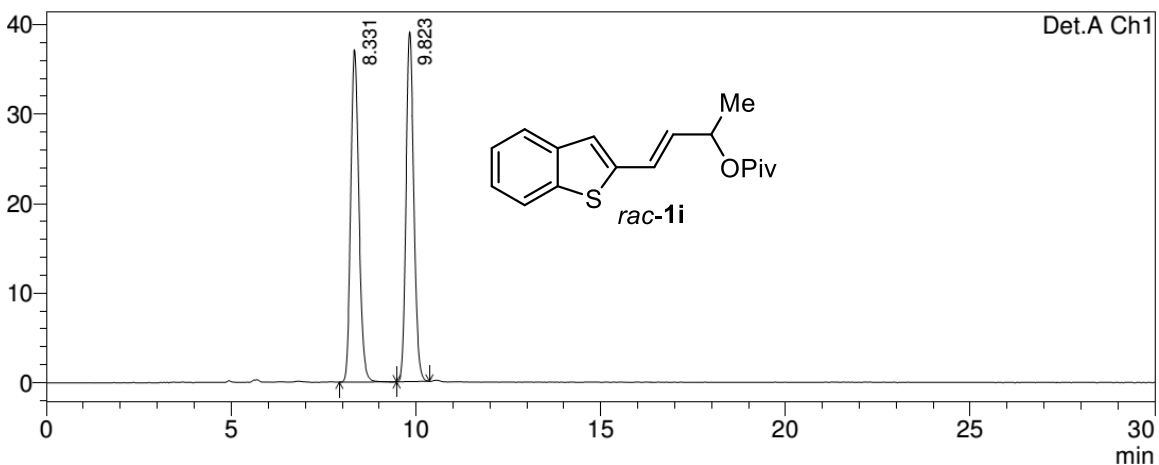

Detector A Ch1 254nm

| Peak# | Ret. Time | Area    | Height | Area %  | Height % |
|-------|-----------|---------|--------|---------|----------|
| 1     | 8.331     | 575382  | 37189  | 50.170  | 48.743   |
| 2     | 9.823     | 571493  | 39106  | 49.830  | 51.257   |
| Total |           | 1146875 | 76295  | 100.000 | 100.000  |

Enantioenriched (*S*)-**1i**, 70% ee

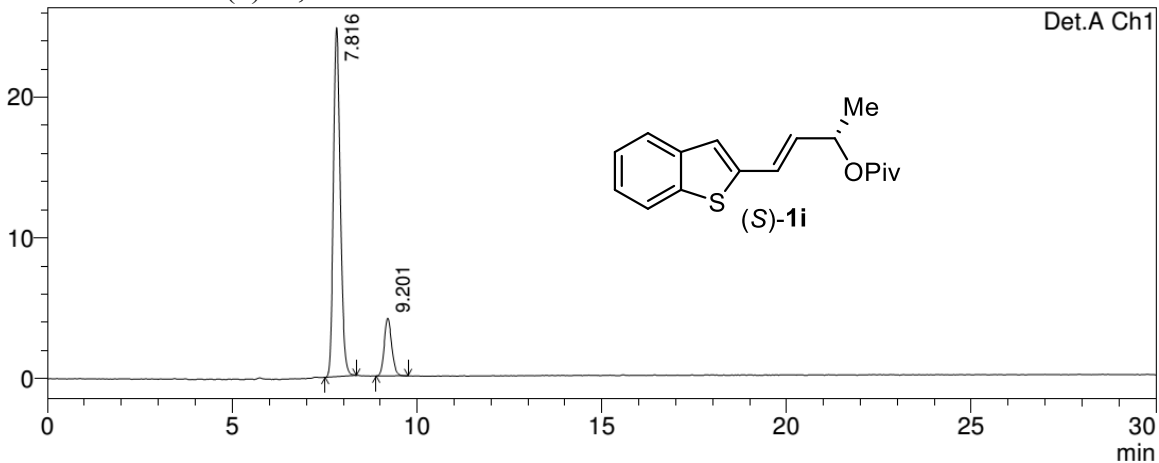

Detector A Ch1 254nm

| Peak# | Ret. Time | Area   | Height | Area %  | Height % |
|-------|-----------|--------|--------|---------|----------|
| 1     | 7.816     | 321095 | 24793  | 84.870  | 85.840   |
| 2     | 9.201     | 57242  | 4090   | 15.130  | 14.160   |
| Total |           | 378336 | 28883  | 100.000 | 100.000  |

Racemic **1j**

mAU

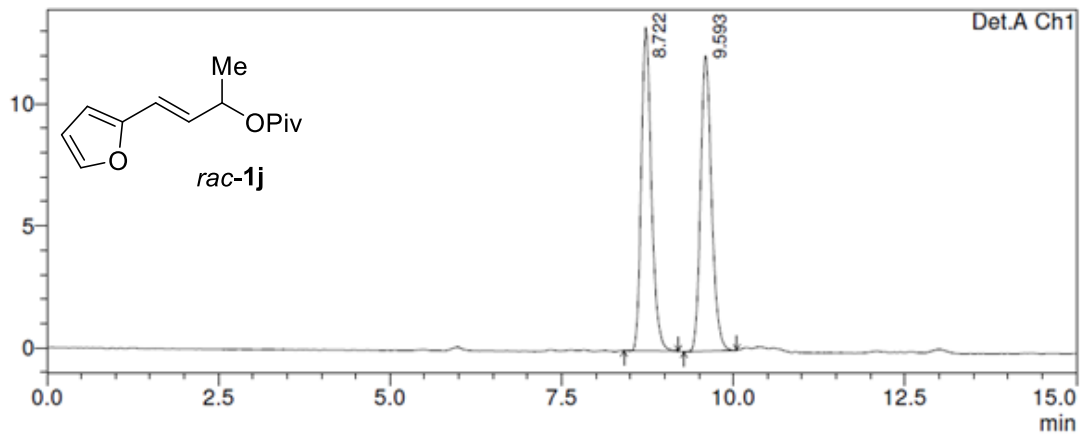

Detector A Ch1 254nm

| Peak# | Ret. Time | Area   | Height | Area %  | Height % |
|-------|-----------|--------|--------|---------|----------|
| 1     | 8.722     | 136201 | 13271  | 50.103  | 52.242   |
| 2     | 9.593     | 135642 | 12132  | 49.897  | 47.758   |
| Total |           | 271843 | 25403  | 100.000 | 100.000  |

Enantioenriched (*S*)-**1j**, 99% ee

mAU

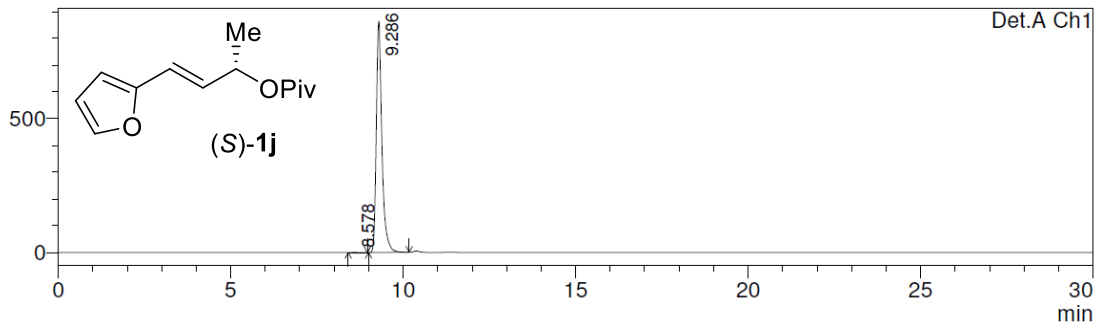

Detector A Ch1 254nm

| Peak# | Ret. Time | Area    | Height | Area %  | Height % |
|-------|-----------|---------|--------|---------|----------|
| 1     | 8.578     | 7142    | 571    | 0.072   | 0.066    |
| 2     | 9.286     | 9953521 | 863992 | 99.928  | 99.934   |
| Total |           | 9960662 | 864563 | 100.000 | 100.000  |

### Racemic **1k**

mAU

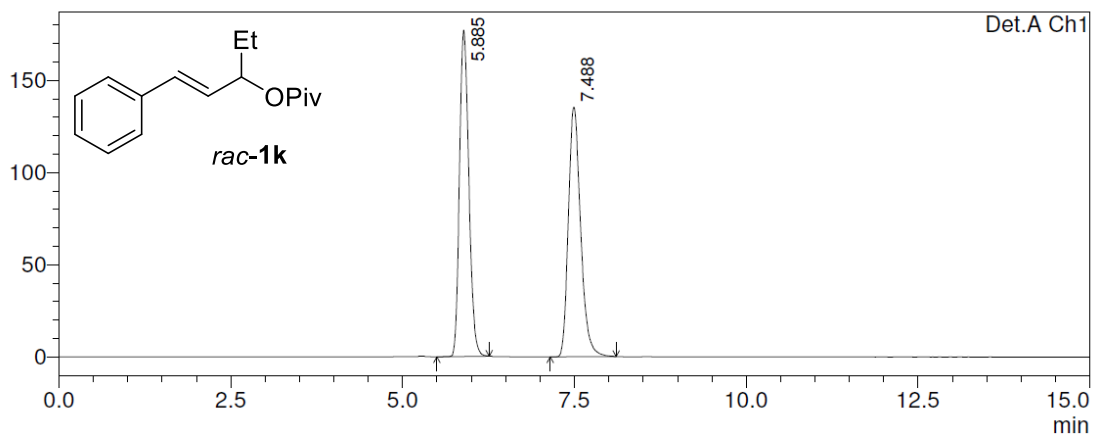

Detector A Ch1 254nm

| Peak# | Ret. Time | Area    | Height | Area %  | Height % |
|-------|-----------|---------|--------|---------|----------|
| 1     | 5.885     | 1677000 | 176994 | 50.017  | 56.641   |
| 2     | 7.488     | 1675869 | 135488 | 49.983  | 43.359   |
| Total |           | 3352870 | 312481 | 100.000 | 100.000  |

### Enantioenriched (*S*)-**1k**, 99% ee

mAU

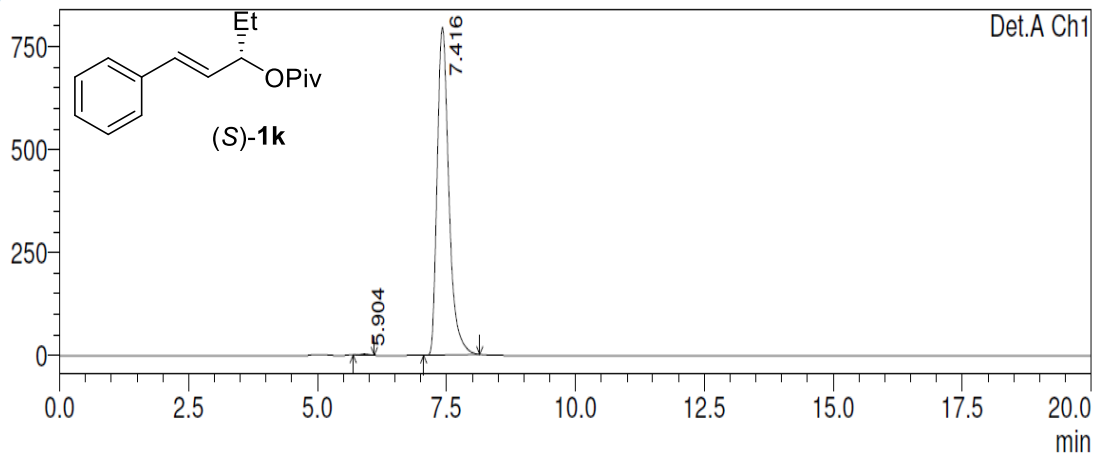

Detector A Ch1 254nm

| Peak# | Ret. Time | Area     | Height | Area %  | Height % |
|-------|-----------|----------|--------|---------|----------|
| 1     | 5.904     | 29135    | 3229   | 0.232   | 0.405    |
| 2     | 7.416     | 12554498 | 794821 | 99.768  | 99.595   |
| Total |           | 12583633 | 798050 | 100.000 | 100.000  |

Racemic **11**

mAU

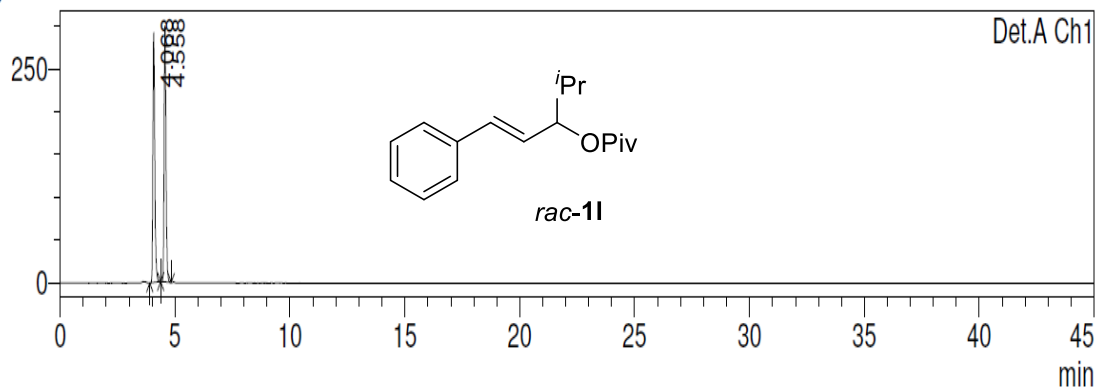

Detector A Ch1 254nm

| Peak# | Ret. Time | Area    | Height | Area %  | Height % |
|-------|-----------|---------|--------|---------|----------|
| 1     | 4.068     | 1669161 | 291954 | 49.996  | 49.430   |
| 2     | 4.558     | 1669422 | 298692 | 50.004  | 50.570   |
| Total |           | 3338582 | 590646 | 100.000 | 100.000  |

Enantioenriched (*S*)-**11**, 99% ee

mAU

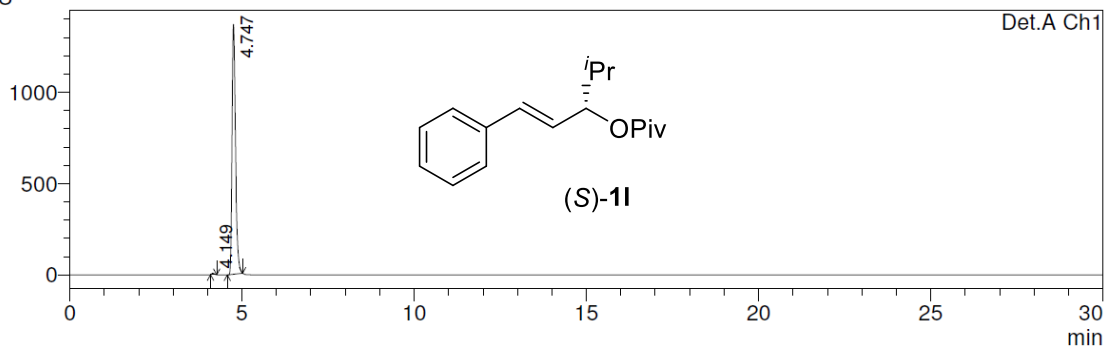

Detector A Ch1 254nm

| Peak# | Ret. Time | Area    | Height  | Area %  | Height % |
|-------|-----------|---------|---------|---------|----------|
| 1     | 4.149     | 46047   | 8338    | 0.476   | 0.605    |
| 2     | 4.747     | 9626484 | 1369240 | 99.524  | 99.395   |
| Total |           | 9672531 | 1377578 | 100.000 | 100.000  |



Racemic **1m**

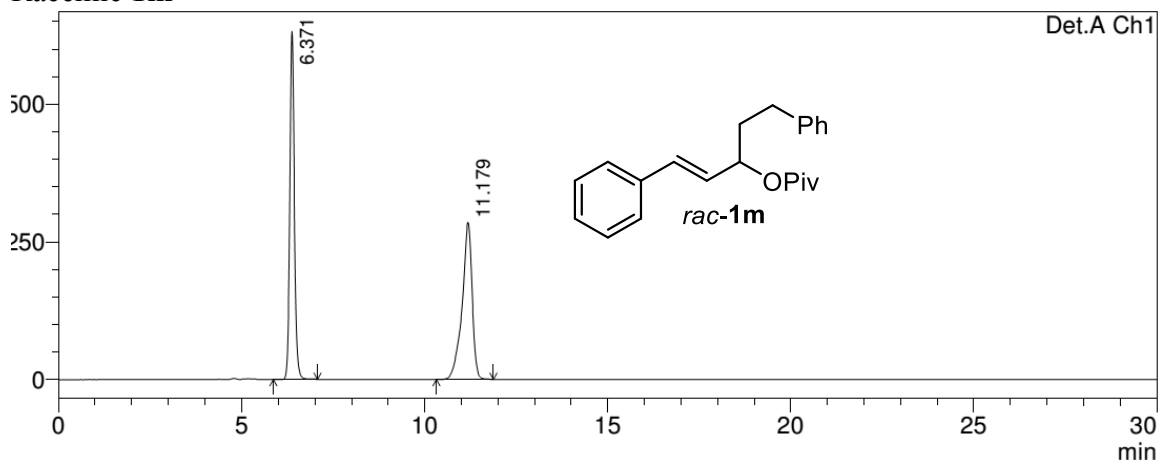

Detector A Ch1 254nm

| Peak# | Ret. Time | Area     | Height | Area %  | Height % |
|-------|-----------|----------|--------|---------|----------|
| 1     | 6.371     | 5421382  | 631961 | 49.966  | 68.882   |
| 2     | 11.179    | 5428694  | 285488 | 50.034  | 31.118   |
| Total |           | 10850076 | 917449 | 100.000 | 100.000  |

Enantioenriched (*S*)-**1m**, >99% ee

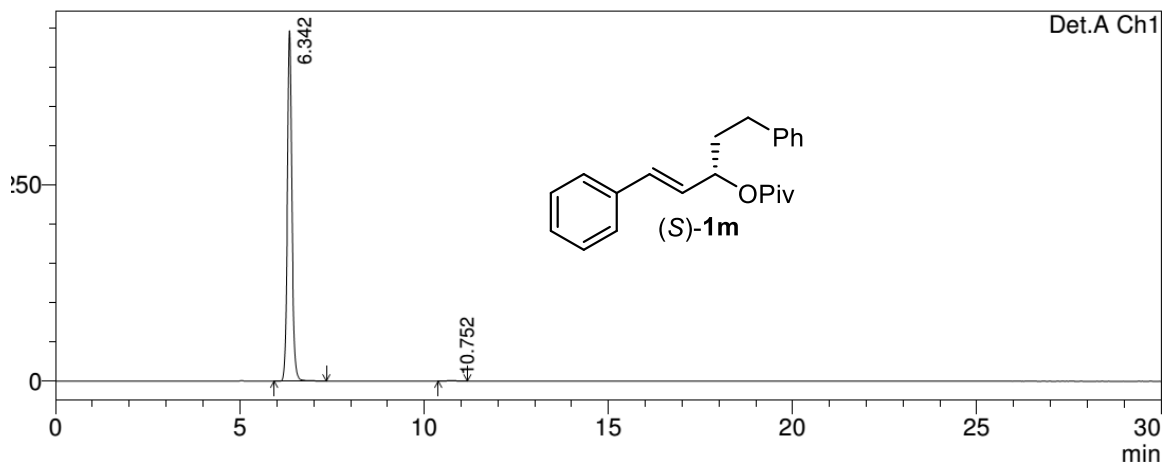

Detector A Ch1 254nm

| Peak# | Ret. Time | Area    | Height | Area %  | Height % |
|-------|-----------|---------|--------|---------|----------|
| 1     | 6.342     | 3836651 | 446020 | 99.772  | 99.885   |
| 2     | 10.752    | 8785    | 514    | 0.228   | 0.115    |
| Total |           | 3845436 | 446534 | 100.000 | 100.000  |

Racemic **1n**

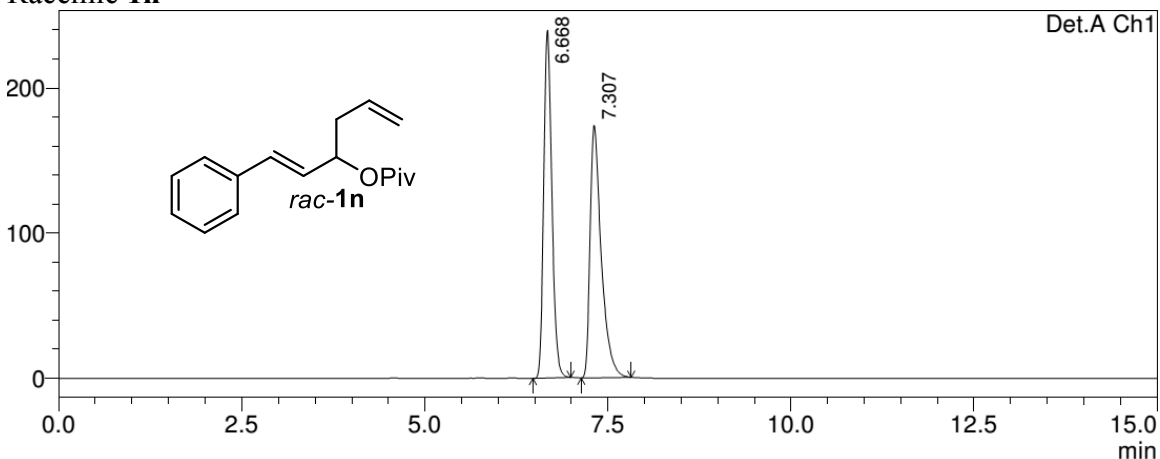

Detector A Ch1 254nm

| Peak# | Ret. Time | Area    | Height | Area %  | Height % |
|-------|-----------|---------|--------|---------|----------|
| 1     | 6.668     | 1856825 | 239598 | 50.111  | 57.948   |
| 2     | 7.307     | 1848604 | 173875 | 49.889  | 42.052   |
| Total |           | 3705428 | 413473 | 100.000 | 100.000  |

Enantioenriched (*S*)-**1n**, >99% ee

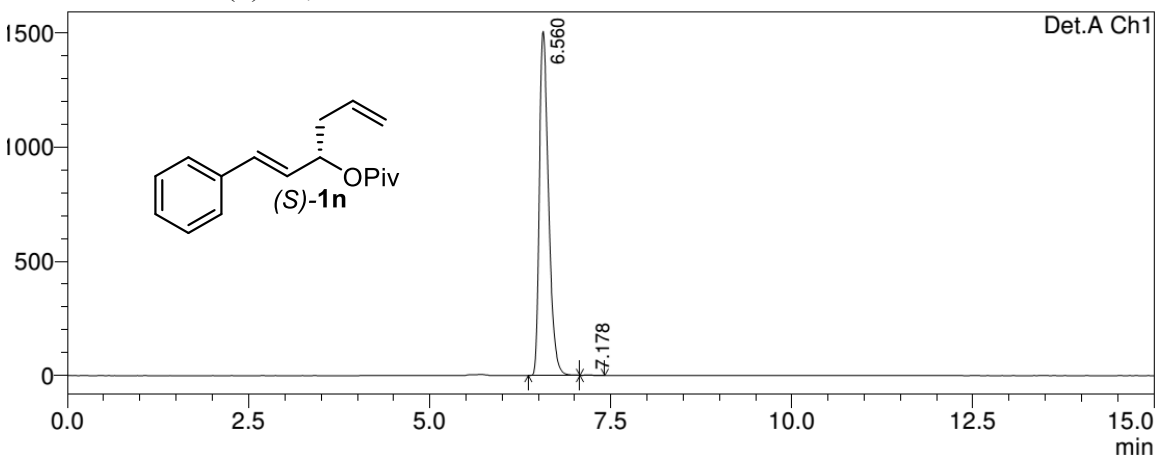

Detector A Ch1 254nm

| Peak# | Ret. Time | Area     | Height  | Area %  | Height % |
|-------|-----------|----------|---------|---------|----------|
| 1     | 6.560     | 13252275 | 1506598 | 99.935  | 99.911   |
| 2     | 7.178     | 8583     | 1338    | 0.065   | 0.089    |
| Total |           | 13260858 | 1507935 | 100.000 | 100.000  |

### Racemic **1o**

mAU

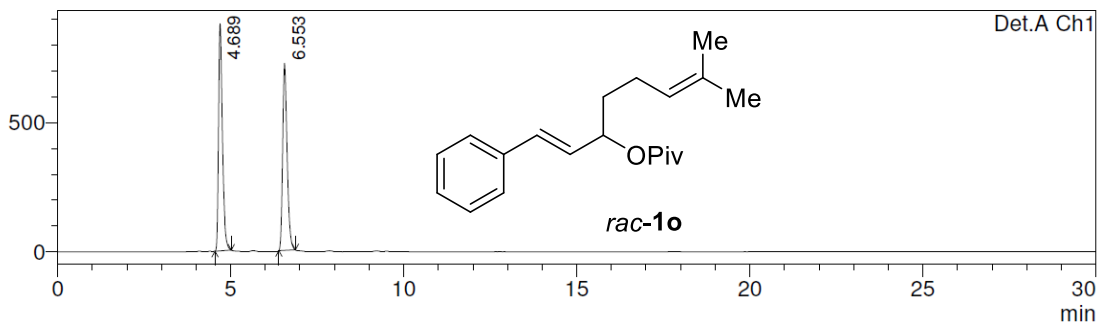

Detector A Ch1 254nm

| Peak# | Ret. Time | Area     | Height  | Area %  | Height % |
|-------|-----------|----------|---------|---------|----------|
| 1     | 4.689     | 6758149  | 879153  | 50.260  | 54.796   |
| 2     | 6.553     | 6688188  | 725245  | 49.740  | 45.204   |
| Total |           | 13446337 | 1604397 | 100.000 | 100.000  |

### Enantioenriched (*S*)-**1o**, 78% ee

mAU

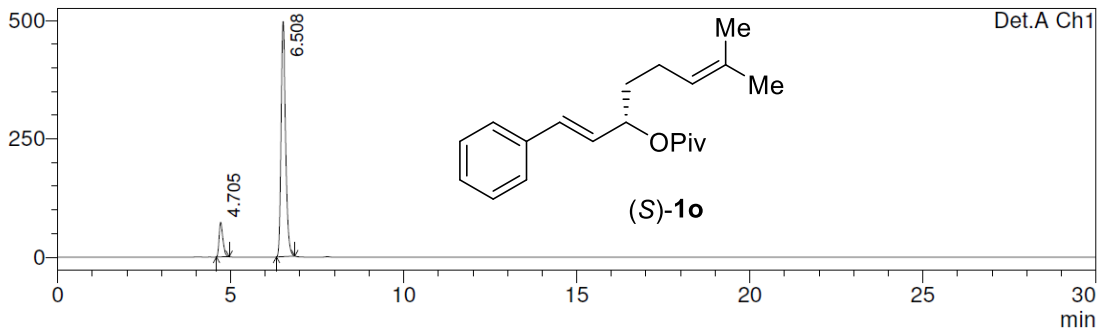

Detector A Ch1 254nm

| Peak# | Ret. Time | Area    | Height | Area %  | Height % |
|-------|-----------|---------|--------|---------|----------|
| 1     | 4.705     | 549103  | 73043  | 10.717  | 12.824   |
| 2     | 6.508     | 4574751 | 496540 | 89.283  | 87.176   |
| Total |           | 5123854 | 569583 | 100.000 | 100.000  |

Racemic **3p**

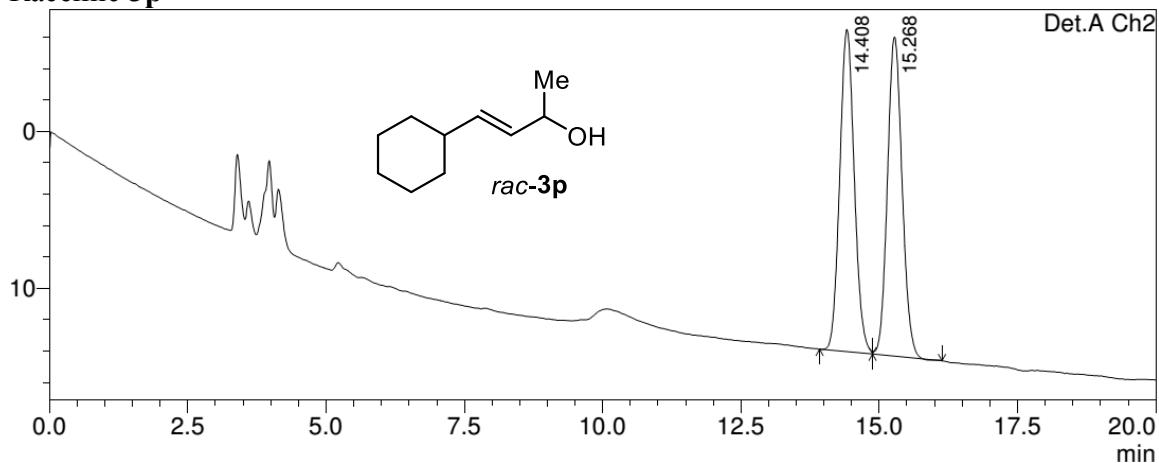

Detector A Ch2 210nm

| Peak# | Ret. Time | Area   | Height | Area %  | Height % |
|-------|-----------|--------|--------|---------|----------|
| 1     | 14.408    | 376692 | 20530  | 50.110  | 50.215   |
| 2     | 15.268    | 375033 | 20354  | 49.890  | 49.785   |
| Total |           | 751724 | 40884  | 100.000 | 100.000  |

Enantioenriched, (*S*)-**3p**, >99% ee

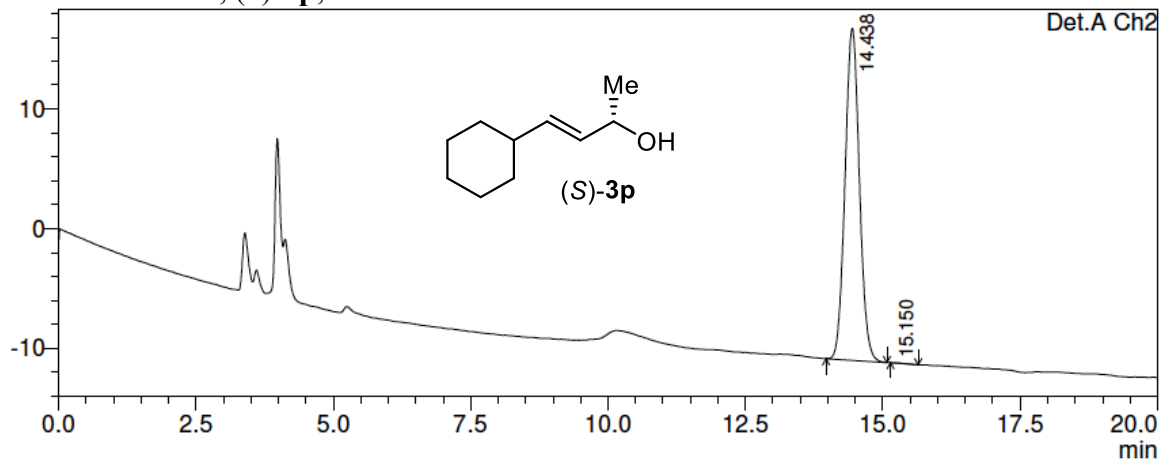

Detector A Ch2 210nm

| Peak# | Ret. Time | Area   | Height | Area %  | Height % |
|-------|-----------|--------|--------|---------|----------|
| 1     | 14.438    | 505358 | 27750  | 99.944  | 99.996   |
| 2     | 15.150    | 281    | 1      | 0.056   | 0.004    |
| Total |           | 505640 | 27751  | 100.000 | 100.000  |

Racemic **8r**

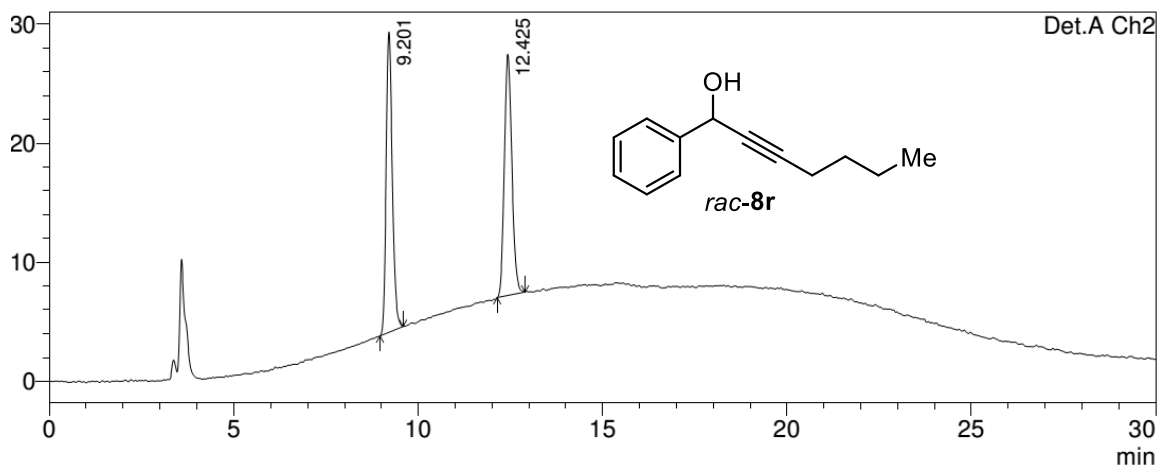

Detector A Ch2 210nm

| Peak# | Ret. Time | Area   | Height | Area %  | Height % |
|-------|-----------|--------|--------|---------|----------|
| 1     | 9.201     | 292810 | 25239  | 50.298  | 55.461   |
| 2     | 12.425    | 289346 | 20268  | 49.702  | 44.539   |
| Total |           | 582156 | 45507  | 100.000 | 100.000  |

Enantioenriched, (*R*)-**8r**, 94% ee

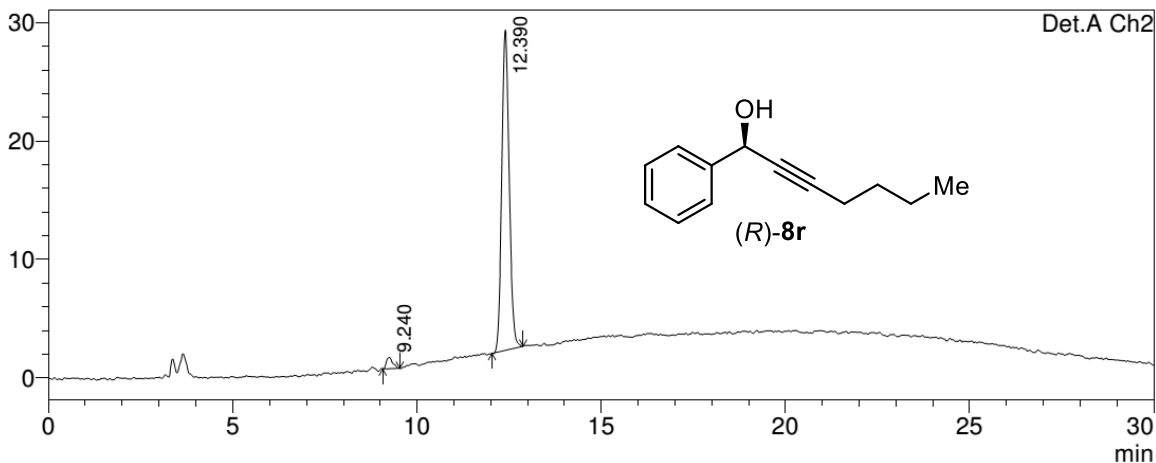

Detector A Ch2 210nm

| Peak# | Ret. Time | Area   | Height | Area %  | Height % |
|-------|-----------|--------|--------|---------|----------|
| 1     | 9.240     | 11371  | 942    | 2.909   | 3.367    |
| 2     | 12.390    | 379442 | 27046  | 97.091  | 96.633   |
| Total |           | 390813 | 27989  | 100.000 | 100.000  |

Racemic **9**

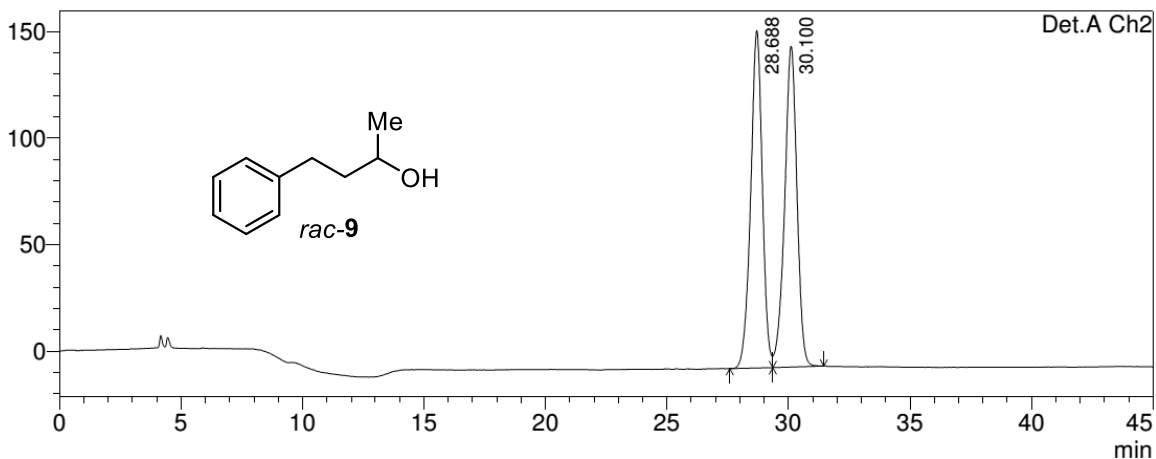

Detector A Ch2 210nm

| Peak# | Ret. Time | Area     | Height | Area %  | Height % |
|-------|-----------|----------|--------|---------|----------|
| 1     | 28.688    | 5275484  | 158371 | 49.824  | 51.253   |
| 2     | 30.100    | 5312766  | 150628 | 50.176  | 48.747   |
| Total |           | 10588250 | 309000 | 100.000 | 100.000  |

Enantioenriched (*R*)-**9**, 95% ee

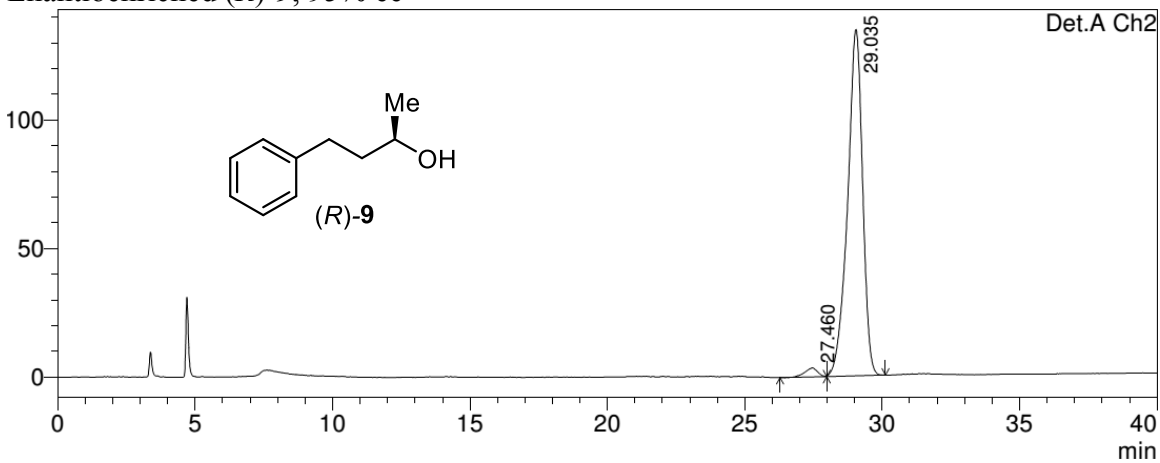

Detector A Ch2 210nm

| Peak# | Ret. Time | Area    | Height | Area %  | Height % |
|-------|-----------|---------|--------|---------|----------|
| 1     | 27.460    | 111513  | 3478   | 2.132   | 2.516    |
| 2     | 29.035    | 5118028 | 134752 | 97.868  | 97.484   |
| Total |           | 5229541 | 138229 | 100.000 | 100.000  |
